# Supplementary material for: The S66x8 benchmark for noncovalent interactions revisited: explicitly correlated ab initio methods and density functional theory
Source: Royal Society of Chemistry journal article supplement (doi:10.1039/c6cp00688d), 2016-01-01
Supplement: c6cp00688d1.xlsx [file c6cp00688d1.xlsx]

## Sheet: Summary
	Reference column		22																																					Error statistics (kcal/mol) for interaction energies of S66x8 set calculated with D2 dispersion corrected MP2, HF and various DFT methods
																		RMSD with respect to:		MP2-F12/cc-pVTZ-F12
RMSD (kcal/mol) for the MP2-F12 limits of the 1.0re slice of S66x8, relative to cc-pV{Q,5}Z-F12 results.										RMSD (kcal/mol) for the interaction energies of S66x8 set calculated with PBE0 using various basis sets relative to counterpoise corrected PBE0/haV5Z										raw	CP	half																		Counterpoise	half	half	half	half	half	half	half	half
																		V{T,Q}Z-F12 CP		0.0582577	0.0452221	0.0122608																		Method	MP2-D2	B2PLYP-D2	B2GP-PLYP-D2	DSD-PBEP86-D2	DSD-PBEPBE-D2	DSD-PBEB95-D2	DSD-APF-D2	dRPA75-D2
MP2-F12						Hobza												VQZ-F12 CP		0.0698822	0.0327321	0.020206																		Basis set	def2-QZVP	haVQZ	haVQZ	haVQZ	haVQZ	haVQZ	def2-QZVP	haV{Q,5}Z
relative to V{Q,5}Z-F12 raw											CP	raw	half					VQZ-F12 half		0.0525302	0.0499589	0.00764735					Error statistics (kcal/mol) for interaction energies of S66x8 set calculated with MP2, HF and various DFT methods													MSD all	0.32	0.024388	0.022341	-0.0161926	0.0122367	-0.0660741	-0.0628787	-0.0168167
	cc-pVTZ-F12	cc-pVQZ-F12	cc-pV5Z-F12	cc-pV{T,Q}Z-F12	cc-pV{Q,5}Z-F12	AV{T,Q}Z				haV5Z	REF	0.00948004	0.00474002					V{T,Q}Z-F12 half		0.0505526	0.0530888	0.0108545					Counterpoise	half	half	half	half	half	half	half	half	full				H-bonds	0.56	0.100019	0.118986	-0.0244157	-0.11547	-0.297087	-0.0911247	-0.100703
raw	0.0726885	0.0348934	0.00891488	0.0288777	REF	MP2				haVQZ	0.00513429	0.0457745	0.151029							MP2-F12/cc-pVQZ-F12							Method	MP2	B2PLYP	B2GP-PLYP	DSD-PBEP86-noD	DSD-PBEPBE-noD	DSD-PBEB95-noD	DSD-APF	dRPA75	PBE0				π stacks	-0.25	-0.0969922	-0.0574093	0.00260787	0.117865	0.0932266	-0.0462749	-0.0579721
counterpoise	0.0502891	0.0130536	0.00395777	0.00573324	0.00371807	0.0147276				haVTZ	0.026784	0.0929054	0.0457745							raw	CP	half					Basis set	def2-QZVP	haVQZ	haVQZ	haVQZ	haVQZ	haVQZ	def2-QZVP	haV{Q,5}Z	def2-QZVP				London	0.5	0.0245349	-0.0617085	-0.0761466	0.056209	0.0736836	-0.115025	0.114898
half-half	0.0166973	0.0128033	0.00438235	0.0159943	0.00185903					def2-QZVP	0.0204555	0.104883	0.053921					V{T,Q}Z-F12 CP		0.0240318	0.0124946	0.00710243					MSD all	0.247641	-1.37486	-0.995295	-0.703097	-1.05628	-0.80386	-0.995588	-0.816399	-1.56061				Mixed	0.22	-0.00199291	0.00570671	0.0228339	0.0777028	0.0290982	-0.00480263	0.0146154
relative to V{Q,5}Z-F12 CP										def2-TZVPP	0.0690186	0.309934	0.157066					VQZ-F12 CP		0.035574	0	0.017787					H-bonds	0.119452	-0.768344	-0.512551	-0.450703	-0.778583	-0.754952	-0.669957	-0.596917	-0.660304				RMSD all	0.605065	0.219804	0.195489	0.151735	0.229881	0.319886	0.230771	0.146243
raw	0.0699965	0.0319836	0.00615358	0.0260351	0.00371807					def2-TZVP	0.143362	0.392129	0.234188					VQZ-F12 half		0.017787	0.017787	0					π stacks	-1.09176	-2.25776	-1.62888	-1.05813	-1.53218	-1.04609	-1.4866	-1.29271	-3.0021				H-bonds	0.705479	0.191191	0.207453	0.147814	0.227213	0.438995	0.194825	0.184545
counterpoise	0.0525522	0.0148867	0.00475938	0.00373195	REF	0.0171437				def2-QZVPD'	0.009587	0.0318317	0.0153241					V{T,Q}Z-F12 half		0.015412	0.0207596	0.00422686					London	-0.221172	-1.97593	-1.51659	-1.05819	-1.47142	-0.981108	-1.44849	-1.02824	-2.33642				π stacks	0.659169	0.21704	0.196188	0.196129	0.318417	0.291366	0.328788	0.123206
half-half	0.0142519	0.00960391	0.00137647	0.012973	0.00185903					def2-TZVPPD'	0.0279286	0.0860287	0.0376123							MP2-F12/cc-pV{T,Q}Z-F12							Mixed	-0.265437	-1.24021	-0.894816	-0.585019	-0.867846	-0.623781	-0.830172	-0.692947	-1.37093				London	0.674068	0.326196	0.236182	0.15917	0.215472	0.250855	0.252266	0.1742
relative to V{Q,5}Z-F12 half										def2-TZVPD'	0.0740245	0.0995233	0.122329							raw	CP	half					RMSD all	0.681247	1.8221	1.33132	0.930402	1.36935	1.00192	1.28034	1.08948	2.22911				Mixed	0.35099	0.157107	0.145318	0.123085	0.184788	0.180846	0.191511	0.0640101
raw	0.071331	0.0334185	0.00743067	0.0274302	0.00185903					aug-pc2	0.0248331	0.108691	0.0507811					V{T,Q}Z-F12 CP		0.0184557	0	0.00922784					H-bonds	0.243151	0.924678	0.627557	0.570436	0.955857	0.948568	0.813627	0.733893	0.853444				s6	-0.16	0.55	0.4	0.27	0.42	0.29	0.366618	0.31429
counterpoise	0.0513995	0.0138762	0.00396255	0.00446573	0.00185903	0.0158728				aug-pc3	0.00273999	0.0104673	0.00458491	partial results				VQZ-F12 CP		0.0295992	0.0124946	0.0207596					π stacks	1.51332	2.80677	2.01107	1.33358	1.92732	1.28788	1.82302	1.68143	3.77367				Counterpoise	full	full	full	full	full	full	full	full
half-half	0.0154111	0.0111635	0.00266342	0.0144431	REF													VQZ-F12 half		0.0124737	0.00710243	0.00422686					London	0.398055	2.37103	1.8075	1.27102	1.7963	1.16267	1.72722	1.30252	2.85737				Method	PBE0-D2	TPSS0-D2	B3P86-D2	B3LYP-D2	B3PW91-D2	PW6B95-D2	APF-D2	ωB97X-V w/o NL with D2
																		V{T,Q}Z-F12 half		0.00922784	0.00922784	0					Mixed	0.464192	1.54263	1.11816	0.736988	1.08747	0.754938	1.02344	0.883858	1.76991				Basis set	def2-QZVP	def2-QZVP	def2-QZVP	def2-QZVP	def2-QZVP	def2-QZVP	def2-QZVP	def2-QZVP
																				MP2/haVQZ							Counterpoise	full	full	full	full	full	full	full	full	full				MSD all	-0.0341535	0.117862	-0.239262	0.176972	-0.0344732	0.0211238	-0.0214571	-0.0460816
RMSD (kcal/mol) for the Hartree-Fock components of the S66x8 interaction energies as calculated with various basis sets																				raw	CP	half					Method	TPSS0	B3P86	B3LYP	B3PW91	PW6B95	APF	ωB97X-V w/o NL	M11	MN12SX				H-bonds	0.287001	0.245016	0.0516711	0.303073	-0.0341078	-0.140444	0.163498	-0.125784
	wrt HF+CABS/cc-pVQZ-F12 CP			wrt HF/haV5Z CP														V{T,Q}Z-F12 CP		0.169523	0.150041	0.0580524					Basis set	def2-QZVP	def2-QZVP	def2-QZVP	def2-QZVP	def2-QZVP	def2-QZVP	def2-QZVP	def2-QZVP	def2-QZVP				π stacks	-0.644895	-0.250144	-0.731708	-0.221229	-0.240086	-0.0864501	-0.458137	-0.303893
	CP	raw	half	CP	raw	half				RMSD (kcal/mol) for the interaction energies of the S66x8 set relative to half-counterpoise corrected MP2-F12/cc-pV{T,Q}Z-F12								VQZ-F12 CP		0.181146	0.139317	0.0621004					MSD all	-2.04462	-2.27453	-2.49432	-2.83297	-1.25092	-2.0837	-1.91515	0.622015	1.1373				London	-0.154098	0.158068	-0.348557	0.368044	0.108806	0.289334	-0.0275394	0.165806
haVQZ	0.00535179	0.0257606	0.0119975	0.00537151	0.0260499	0.0123102												VQZ-F12 half		0.165349	0.155512	0.0592208					H-bonds	-1.097	-1.2114	-1.35471	-1.77083	-0.929865	-1.11632	-1.28572	0.613296	1.18645				Mixed	-0.0201468	0.129503	-0.256569	0.106861	-0.0252188	0.0863769	-0.0118616	0.0367554
haVTZ	0.0281087	0.109542	0.051019	0.0279841	0.109819	0.0512816												V{T,Q}Z-F12 half		0.162564	0.158028	0.0586934					π stacks	-3.58952	-3.87465	-4.34634	-4.56163	-2.05079	-3.64273	-3.19018	0.840518	1.19002				RMSD all	0.462291	0.412184	0.555527	0.48166	0.46747	0.336407	0.402911	0.31077
def2-QZVP	0.0132926	0.063171	0.0310093	0.0135007	0.0635182	0.0314064				Counterpoise	raw	CP	half							MP2/haVTZ							London	-2.93356	-3.25833	-3.45103	-3.89213	-1.52927	-2.97587	-2.50635	0.693806	1.29227				H-bonds	0.472816	0.439944	0.449406	0.413607	0.331258	0.279713	0.387246	0.290205
haV5Z	0.00179419	0.00790091	0.00407477	REF	0.00805431	0.00402716				MP2-F12/cc-pVTZ-F12	0.0582577	0.0452221	0.0122608							raw	CP	half					Mixed	-1.78411	-2.05761	-2.25701	-2.50166	-1.03928	-1.83678	-1.61722	0.476127	0.95369				π stacks	0.782473	0.432016	0.859392	0.348472	0.557855	0.24256	0.574639	0.360989
def2-TZVPP	0.0459017	0.229094	0.0116723	0.0461246	0.229407	0.0112906				MP2-F12/cc-pVQZ-F12	0.0240318	0.0124946	0.00710243					V{T,Q}Z-F12 CP		0.460638	0.346146	0.162163					RMSD all	2.79475	2.99511	3.36289	3.67285	1.63189	2.8135	2.54273	0.746655	1.30693				London	0.355792	0.478331	0.626815	0.7999	0.692221	0.526251	0.447317	0.424117
def2-TZVP	0.110146	0.297934	0.132466	0.110323	0.298232	0.132158				MP2-F12/cc-pV{T,Q}Z-F12	0.0184557	REF	0.00922784					VQZ-F12 CP		0.472201	0.335503	0.16752					H-bonds	1.32338	1.40933	1.61818	2.04179	1.15765	1.32851	1.57924	0.730581	1.35712				Mixed	0.24444	0.309894	0.401859	0.303716	0.357615	0.272131	0.260952	0.19945
VQZ-F12+CABS	REF	0.00773052	0.00386526	0.00179419	0.00819326	0.00449823				MP2/haVTZ	0.460638	0.346146	0.162163					VQZ-F12 half		0.456706	0.351588	0.162456					π stacks	4.50249	4.74593	5.45819	5.64167	2.57177	4.53984	4.04883	0.97004	1.39909				s6	0.6	0.85	0.8	1.05	1.1	0.5	0.810603	0.734672
										MP2/haVQZ	0.169523	0.150041	0.0580524					V{T,Q}Z-F12 half		0.45402	0.354072	0.161385					London	3.60627	3.86479	4.18762	4.69254	1.85704	3.61017	3.06737	0.812122	1.43965				Counterpoise	full	full	full	full	full	full	full	full
										MP2/haV5Z	0.0731869	0.0786589	0.0261385							MP2/def2-QZVP							Mixed	2.27409	2.51961	2.83092	3.08138	1.30322	2.30557	2.03857	0.571602	1.09209				Method	M06-D2	TPSS-D2	M06L-D2	PBE-D2	BP86-D2	BLYP-D2	B97D2	HF-D2
										MP2/haV{T,Q}Z	0.0472271	0.0183666	0.0232782							raw	CP	half					Counterpoise	full	full	full	full	full	full	full	full	full	full			Basis set	def2-QZVP	def2-QZVP	def2-QZVP	def2-QZVP	def2-QZVP	def2-QZVP	def2-QZVP	def2-QZVP
										MP2/haV{Q,5}Z	0.0279242	0.0109386	0.0168504					V{T,Q}Z-F12 CP		0.158014	0.289157	0.0841213					Method	M06	M06-2X	TPSS	M06L	PBE	BP86	BLYP	B97D w/o D	HF	LDA-SPW92			MSD all	-0.138602	0.2791	0.18172	0.275719	-0.114181	-0.0651294	-0.130841	0.100386
										MP2/def2-QZVP	0.158014	0.289157	0.0841213					VQZ-F12 CP		0.168979	0.277561	0.0747213					Basis set	def2-QZVP	def2-QZVP	def2-QZVP	def2-QZVP	def2-QZVP	def2-QZVP	def2-QZVP	def2-QZVP	def2-QZVP	def2-QZVP			H-bonds	-0.321371	0.268359	0.393397	0.43935	-0.0405881	-0.055141	-0.44101	-0.148258
																		VQZ-F12 half		0.152822	0.294592	0.0886325					MSD all	-0.774625	0.287621	-2.26499	0.690538	-1.63235	-2.78548	-3.11804	-3.31095	-3.07973	-1.13717			π stacks	-0.242292	0.0644959	0.0620326	-0.155087	-0.350972	-0.387394	-0.2152	-0.235163
																		V{T,Q}Z-F12 half		0.150332	0.297328	0.0910384					H-bonds	-0.716082	0.260524	-1.31048	0.709165	-0.744781	-1.69837	-1.94975	-2.41456	-2.12181	-2.38024			London	0.315843	0.51629	-0.237002	0.401033	0.0138187	0.250161	0.362441	0.579124
																				MP2/haV5Z							π stacks	-1.22446	0.288893	-3.86418	0.847768	-3.10159	-4.47608	-5.1018	-5.12604	-5.14601	-0.0844824			Mixed	-0.171963	0.24458	0.270303	0.221492	-0.163616	-0.120423	-0.0525994	0.24292
																				raw	CP	half					London	-0.593459	0.420537	-3.12092	0.490441	-2.32688	-3.80525	-4.11449	-4.18407	-3.96739	-0.445905			RMSD all	0.509446	0.518835	0.450527	0.501168	0.543131	0.427871	0.512972	0.598745
RMSD (kcal/mol) for the interaction energies of S66x8 set calculated with DSD-PBEP86 method using various basis sets																		V{T,Q}Z-F12 CP		0.0731869	0.0786589	0.0261385					Mixed	-0.73479	0.231752	-2.00673	0.720565	-1.46699	-2.52749	-2.82199	-2.86673	-2.57121	-0.68331			H-bonds	0.45045	0.426432	0.477341	0.569653	0.406695	0.249448	0.683073	0.559956
		counterpoise	raw	half-half		counterpoise	raw	half-half		counterpoise	raw	half-half						VQZ-F12 CP		0.0848188	0.0679519	0.0285883					RMSD all	0.966104	0.449989	3.07839	0.804483	2.33957	3.57128	4.09773	4.40027	4.1948	2.06006			π stacks	0.419013	0.433182	0.296813	0.317489	0.661933	0.472328	0.41185	0.705804
RMSD																		VQZ-F12 half		0.0688499	0.0840657	0.0285504					H-bonds	0.834606	0.381084	1.59446	0.788823	0.985427	1.94692	2.32844	2.92749	2.63665	3.18243			London	0.798069	0.804524	0.542659	0.656338	0.776417	0.733401	0.538711	0.806692
haV{Q,5}Z	rel. to CP	0.0357033	0.0298609	0.0304941	rel. to half	0.016547	0.0360261	0.0251501	rel. to raw	0.046432	0.0677283	0.0567293						V{T,Q}Z-F12 half		0.0661344	0.0866125	0.0291408					π stacks	1.48732	0.546534	4.90485	0.994763	3.96821	5.4899	6.41917	6.67142	6.69953	0.859906			Mixed	0.348345	0.405789	0.41512	0.35394	0.415147	0.267244	0.241535	0.387792
haV5Z	rel. to CP	REF	0.0759347	0.0379674	rel. to half	0.0379674	0.0379674	REF	rel. to raw	0.0759347	REF	0.0379674								MP2/haV{Q,5}Z							London	0.805193	0.566965	3.88527	0.586621	2.90221	4.52248	5.00907	5.31782	4.99669	1.02832			s6	0.25	1	0.2	0.75	1.05	1.2	1.25	1.25
haVQZ	rel. to CP	0.0340297	0.137664	0.0557375	rel. to half	0.0701961	0.100587	0.0239712	rel. to raw	0.10761	0.0645536	0.0304238								raw	CP	half					Mixed	0.866922	0.378042	2.55111	0.837677	1.89683	3.06031	3.5021	3.66123	3.3768	1.14042
haVTZ	rel. to CP	0.13036	0.322263	0.121803	rel. to half	0.165088	0.286148	0.0947624	rel. to raw	0.200991	0.250582	0.0775038						V{T,Q}Z-F12 CP		0.0279242	0.0109386	0.0168504
def2-QZVPD'	rel. to CP	0.0753964	0.172063	0.0589328	rel. to half	0.11192	0.136058	0.0367001	rel. to raw	0.149166	0.101494	0.0458669						VQZ-F12 CP		0.0236806	0.0172598	0.0162347
def2-QZVP	rel. to CP	0.10205	0.16282	0.0407664	rel. to half	0.138923	0.127746	0.0317622	rel. to raw	0.176261	0.0949234	0.0569106						VQZ-F12 half		0.029374	0.0111063	0.018092
def2-TZVPPD'	rel. to CP	0.199488	0.353487	0.122783	rel. to half	0.235489	0.318922	0.106228	rel. to raw	0.272025	0.285222	0.101863						V{T,Q}Z-F12 half		0.0314333	0.0125053	0.0201606
def2-TZVPP	rel. to CP	0.298478	0.347665	0.102082	rel. to half	0.335104	0.315304	0.106284	rel. to raw	0.371998	0.284333	0.122699								MP2/haV{T,Q}Z
def2-TZVPD	rel. to CP	0.281343	0.380175	0.157344	rel. to half	0.31656	0.348968	0.154622	rel. to raw	0.352348	0.319229	0.161065								raw	CP	half
TZVP	rel. to CP	0.401188	0.380872	0.20295	rel. to half	0.436368	0.355152	0.215535	rel. to raw	0.471979	0.33179	0.233678						V{T,Q}Z-F12 CP		0.0472271	0.0183666	0.0232782
																		VQZ-F12 CP		0.0439514	0.0288306	0.0252878
																		VQZ-F12 half		0.0469213	0.0156124	0.0219245
																		V{T,Q}Z-F12 half		0.0479065	0.0141144	0.0224751
Error statistics (kcal/mol) for the S66x8 interaction energies calculated at the half-counterpoise MP2-F12/cc-pVQZ-F12 level and spin-component scaled variants thereof, as well as with raw [MP3-F12 – MP2-F12]/cc-pVDZ-F12 terms added
	MP2-F12	SCS-MP2-F12	SCS(MI)MP2-F12	S2-MP2-F12	SCS-MP3-F12	MP2.5	SCS-MP2.Xopt
MSD all	0.293413	-0.54121	-0.178217	0.10246	-0.693908	-0.0119826	-0.0313722
H-bonds	-0.0507078	-0.732078	-0.166149	-0.246011	-0.753369	-0.0932905	-0.0771902
π stacks	1.1187	-0.239736	0.0490912	0.852054	-0.679914	0.238344	0.141681
London	0.227622	-0.697922	-0.474974	0.0421231	-0.867695	-0.111923	-0.128235
Mixed	0.319271	-0.370587	-0.112855	0.167623	-0.519563	0.0213197	-0.00224773
RMSD all	0.687783	0.767587	0.342077	0.573029	0.90105	0.20673	0.194112
H-bonds	0.183656	0.966699	0.22206	0.393038	0.971556	0.121821	0.0983502
π stacks	1.53631	0.526525	0.233303	1.22564	0.887266	0.422479	0.398224
London	0.397022	0.880536	0.61502	0.256362	1.08973	0.188426	0.200151
Mixed	0.489564	0.476504	0.237424	0.334864	0.654397	0.107906	0.0888181
cSS	1	0.333333	1.29	0.75	0.333	1	1.01178
cAB	1	1.2	0.4	1.15	1.2	1	1.01178
cMP3	0	0	0	0	0.25	0.5	0.596687
S66x8 error statistics (kcal/mol) for CCSD(F12*) and spin-component-scaled variants thereof, as well as for CCSD(T)(F12*) and CCSD(T*)(F12*)
	SCS(Adhoc)CCSD(F12*)	SCS-CCSD(F12*)	SCS(MI)CCSD(F12*)	scaled CCSD(F12*)	CCSD(T)-(F12*)	CCSD(T*)-(F12*)	CCSD(F12*)	CCSD(F12*)-D2
MSD all	0.00338455	-0.133625	-0.0520935	-0.00706056	-0.0841996	-0.00651756	-0.586019	-0.0137554
H-bonds	0.0197532	-0.176812	-0.0261217	-0.0480188	-0.0665706	0.0112003	-0.440288	-0.0851457
π stacks	-0.0879981	-0.207253	-0.171135	-0.0425356	-0.144393	-0.0441635	-1.00283	-0.119121
London	0.0315744	-0.068097	-0.034646	0.0644613	-0.094424	-0.0383074	-0.68786	0.130288
Mixed	0.0119286	-0.0897375	-0.0337811	0.0112897	-0.0677302	0.0125933	-0.479007	0.0273978
RMSD all	0.0862155	0.213941	0.112861	0.116625	0.113435	0.0457362	0.788268	0.155965
H-bonds	0.0586137	0.278333	0.0668724	0.133328	0.0842344	0.0289084	0.5552	0.176936
π stacks	0.128276	0.278646	0.224484	0.110308	0.187105	0.0582304	1.29287	0.163791
London	0.130379	0.137515	0.121375	0.154709	0.119735	0.053042	0.864484	0.198493
Mixed	0.036082	0.104114	0.0460337	0.0529191	0.0864867	0.0491706	0.61197	0.0724365
cSS	1.31244	1.13	1.28	1.23366	1	1	1	1
cAB	1.11541	1.27	1.11	1.23366	1	1	1	1
S66x8 error statistics (kcal/mol) for CCSD-F12b and spin-component-scaled variants thereof, as well as for CCSD(T)-F12b and CCSD(T*)-F12b
	SCS(Adhoc)CCSD-F12b	SCS-CCSD-F12b	SCS(MI)CCSD-F12	scaled CCSD-F12	CCSD(T)-F12b	CCSD(T*)-F12b	CCSD-F12b
MSD all	0.00492836	-0.144072	-0.0559232	-0.0151639	-0.0824391	-0.00284399	-0.59473
H-bonds	0.0194912	-0.190481	-0.03112	-0.0588756	-0.0651453	0.0144468	-0.446794
pi stacks	-0.0917143	-0.226093	-0.182425	-0.0588008	-0.141444	-0.0383964	-1.01872
London	0.0426986	-0.0673808	-0.0299582	0.0673085	-0.0926236	-0.0347976	-0.69888
mixed	0.0119518	-0.0995388	-0.0380732	0.00331585	-0.0662043	0.0158177	-0.485166
RMSD all	0.0770356	0.224841	0.111035	0.113429	0.111019	0.0443063	0.79984
H-bonds	0.0592366	0.296137	0.0714169	0.144438	0.082393	0.0305028	0.563313
pi stacks	0.132697	0.301802	0.238673	0.120801	0.183289	0.0510945	1.31363
London	0.091105	0.104619	0.0761932	0.116116	0.117155	0.0493368	0.876393
mixed	0.0367314	0.115403	0.0506342	0.0490517	0.0845416	0.0502051	0.619824
cSS	1.3158	1.13	1.28	1.23366	1	1	1
cAB	1.11528	1.27	1.11	1.23366	1	1	1

## Sheet: Table S1- SAPT results
	haVTZ
															R**2	0.990514		R**2	0.917454
													VDZ-F12		NDF2	CSPI			DEBC			Hobza ratio
Molecules	SCF	E2aa+E2bb	E2ab	SAPT0-disp	Disp20	Exch-Disp20	Electrostatics	Exchange	Induction	Ind20,r	Exch-Ind20,r	deltaHF	HLC(Tc)sc		Edisp2/E2-1	(E2ss-E2ab)/E2		sqrt(x^2/(1+x^2))			Disp/Elst	Disp/(Elst+Ind)		%HF	%HLC
01_Water-Water_0.90	-2.83909	-1.03235	-0.400085	-2.73293	-3.42592	0.692996	-10.7642	11.4014	-3.47623	-4.83256	2.85469	-1.49836	-0.01421		0.907889	0.441392		0.672186	0.403805		0.25389	0.191913		66.2451	0.331565
01_Water-Water_0.95	-3.45399	-0.843337	-0.318051	-2.19012	-2.69224	0.502118	-8.86334	7.92401	-2.51466	-3.35939	1.88164	-1.03692	0.0104552		0.88578	0.452292		0.663063	0.4121		0.247099	0.192487		75.0065	-0.227044
01_Water-Water_1.00	-3.72461	-0.688238	-0.248988	-1.76198	-2.12399	0.362013	-7.39032	5.50022	-1.83451	-2.35978	1.24021	-0.714952	0.0235121		0.879992	0.46867		0.660624	0.424375		0.238417	0.191004		80.3008	-0.50691
01_Water-Water_1.05	-3.77562	-0.561104	-0.191255	-1.4216	-1.68121	0.259608	-6.23524	3.80856	-1.34894	-1.67363	0.816247	-0.491558	0.0283103		0.889523	0.491586		0.664629	0.441162		0.227995	0.187443		83.9088	-0.629163
01_Water-Water_1.10	-3.68988	-0.457517	-0.143509	-1.15086	-1.33634	0.185476	-5.32316	2.63434	-1.00106	-1.20057	0.537385	-0.337877	0.027765		0.914828	0.522453		0.674987	0.463063		0.216199	0.181977		86.5531	-0.651281
01_Water-Water_1.25	-3.08496	-0.248741	-0.0461095	-0.62231	-0.688539	0.0662287	-3.51933	0.866551	-0.432189	-0.476291	0.154273	-0.110171	0.0137272		1.1106	0.687235		0.74314	0.56638		0.176827	0.157487		91.6484	-0.407809
01_Water-Water_1.50	-2.02925	-0.0917962	0.0227592	-0.240115	-0.251243	0.0111275	-2.03504	0.134119	-0.128324	-0.12993	0.0194868	-0.017881	-0.0062852		2.47807	1.65933		0.92734	0.856489		0.11799	0.110992		96.421	0.298645
01_Water-Water_2.00	-0.90993	-0.0130279	0.0378538	-0.0497786	-0.0500499	0.00027127	-0.892277	0.00312899	-0.0207818	-0.0204443	0.00037217	-0.0007097	-0.0111581		-3.00511	-2.04954		0.948844	0.89873		0.0557883	0.0545185		101.525	1.24496
02_Water-MeOH_0.90	-2.699	-1.42906	-0.773795	-3.64166	-4.52047	0.878814	-12.21	13.7819	-4.27095	-6.17045	3.73247	-1.83297	-0.0970434		0.653155	0.297462		0.546844	0.285115		0.298253	0.220962		53.9919	1.94129
02_Water-MeOH_0.95	-3.4371	-1.19208	-0.651947	-2.96399	-3.60902	0.645033	-9.99861	9.67893	-3.11742	-4.32731	2.49977	-1.28988	-0.0553206		0.607344	0.292909		0.519104	0.281099		0.29644	0.225982		64.408	1.03666
02_Water-MeOH_1.00	-3.78879	-0.99345	-0.545934	-2.42178	-2.89269	0.470907	-8.28324	6.78689	-2.29243	-3.06264	1.67335	-0.903136	-0.0277012		0.573215	0.290711		0.497307	0.279154		0.292371	0.228995		70.7408	0.517212
02_Water-MeOH_1.05	-3.89055	-0.827383	-0.454488	-1.98486	-2.32679	0.341923	-6.93984	4.74718	-1.69788	-2.18602	1.11823	-0.630088	-0.0108919		0.548412	0.290899		0.480849	0.279321		0.28601	0.22979		75.0591	0.210134
02_Water-MeOH_1.10	-3.83389	-0.689478	-0.376461	-1.63261	-1.87996	0.247344	-5.88212	3.31654	-1.26831	-1.57616	0.747136	-0.439288	-0.0018765		0.531619	0.293654		0.469409	0.281757		0.277555	0.228324		78.2154	0.0382825
02_Water-MeOH_1.25	-3.24252	-0.401581	-0.206687	-0.926802	-1.01862	0.0918133	-3.80922	1.12315	-0.556451	-0.630395	0.223332	-0.149388	0.00124029		0.523674	0.320408		0.463913	0.305128		0.243305	0.212293		84.2312	-0.032219
02_Water-MeOH_1.50	-2.13272	-0.168548	-0.0629432	-0.386397	-0.403018	0.0166209	-2.14717	0.18218	-0.167723	-0.171966	0.0302294	-0.0259869	-0.0104311		0.669167	0.456194		0.556138	0.415045		0.179956	0.166918		89.8123	0.439271
02_Water-MeOH_2.00	-0.937423	-0.0346187	0.0110694	-0.0896843	-0.0901506	0.00046638	-0.914632	0.00466882	-0.0274591	-0.0269057	0.00063938	-0.00119268	-0.0125575		2.80836	1.9401		0.942059	0.888872		0.098055	0.095197		96.2911	1.2899
03_Water-MeNH2_0.90	-3.52754	-1.68778	-1.05657	-4.16121	-5.42873	1.26752	-16.2908	19.0031	-6.23986	-9.35182	5.86766	-2.7557	-0.218566		0.516281	0.230003		0.45875	0.224151		0.255433	0.184691		54.3497	3.36749
03_Water-MeNH2_0.95	-4.34512	-1.41734	-0.890511	-3.39102	-4.35128	0.96026	-13.4322	13.7599	-4.67275	-6.82083	4.17297	-2.0249	-0.152109		0.469342	0.228277		0.424873	0.222552		0.252454	0.187298		63.8511	2.23522
03_Water-MeNH2_1.00	-4.73049	-1.18866	-0.748505	-2.7742	-3.4974	0.723194	-11.1652	9.95299	-3.51833	-5.00975	2.96782	-1.4764	-0.104015		0.432094	0.227216		0.396649	0.221569		0.24847	0.188933		69.8571	1.53603
03_Water-MeNH2_1.05	-4.83176	-0.99577	-0.627491	-2.2761	-2.81758	0.54148	-9.35512	7.18562	-2.66226	-3.70005	2.10799	-1.07021	-0.070432		0.402178	0.226876		0.373132	0.221253		0.2433	0.189401		74.0448	1.07934
03_Water-MeNH2_1.10	-4.75041	-0.834222	-0.525138	-1.87329	-2.27699	0.403698	-7.90707	5.1834	-2.02674	-2.74981	1.49665	-0.773573	-0.0479413		0.37807	0.227375		0.35364	0.221716		0.236914	0.188578		77.1457	0.778558
03_Water-MeNH2_1.25	-4.01002	-0.492432	-0.304492	-1.06111	-1.22475	0.163639	-5.01858	1.93547	-0.926897	-1.17118	0.53449	-0.290204	-0.0194204		0.331508	0.235832		0.314668	0.229535		0.211436	0.178473		83.0857	0.402381
03_Water-MeNH2_1.50	-2.6155	-0.211551	-0.117744	-0.435059	-0.469381	0.0343215	-2.70223	0.371511	-0.284773	-0.32391	0.0966434	-0.0575061	-0.0168592		0.321184	0.284872		0.305798	0.273972		0.161	0.145651		88.3121	0.56925
03_Water-MeNH2_2.00	-1.09282	-0.0479104	-0.0120316	-0.0954695	-0.0967994	0.00132997	-1.06312	0.0134563	-0.0431626	-0.0434836	0.00322162	-0.00290062	-0.0171148		0.592698	0.598559		0.509869	0.513586		0.0898015	0.0862978		93.4133	1.46295
04_Water-Peptide_0.90	-4.67806	-1.74885	-0.644126	-5.22228	-6.49513	1.27285	-16.9789	18.5717	-6.27085	-8.88629	5.18418	-2.56874	0.0550528		1.18234	0.461653		0.763526	0.419144		0.307575	0.224617		66.6772	-0.784677
04_Water-Peptide_0.95	-5.49654	-1.49072	-0.545047	-4.35709	-5.32133	0.964247	-14.2026	13.4218	-4.71569	-6.45282	3.60269	-1.86557	0.0880992		1.14027	0.464529		0.751836	0.421293		0.30678	0.23031		73.8365	-1.18346
04_Water-Peptide_1.00	-5.87284	-1.26888	-0.454768	-3.6496	-4.37692	0.727322	-11.9994	9.69967	-3.57306	-4.73213	2.50746	-1.34838	0.108391		1.11737	0.472319		0.745158	0.427078		0.304147	0.234362		78.429	-1.44751
04_Water-Peptide_1.05	-5.9585	-1.07881	-0.374007	-3.06642	-3.61266	0.546247	-10.2355	7.00352	-2.72651	-3.50071	1.74565	-0.971448	0.118381		1.11067	0.485129		0.743162	0.436478		0.299586	0.236569		81.7023	-1.62323
04_Water-Peptide_1.10	-5.85665	-0.917232	-0.303106	-2.5854	-2.99459	0.409193	-8.81797	5.05917	-2.09785	-2.61542	1.21732	-0.699753	0.12064		1.11859	0.503243		0.745521	0.449529		0.293197	0.236849		84.1914	-1.73424
04_Water-Peptide_1.25	-5.03175	-0.564184	-0.142106	-1.57657	-1.74617	0.169603	-5.93954	1.90906	-1.00127	-1.15516	0.416951	-0.263068	0.102939		1.23219	0.597599		0.776469	0.512979		0.265437	0.227145		89.293	-1.82674
04_Water-Peptide_1.50	-3.46007	-0.252319	0.000811288	-0.730012	-0.767763	0.0377502	-3.50169	0.380384	-0.338763	-0.357573	0.0732224	-0.0544124	0.0584678		1.90254	1.00645		0.885175	0.709377		0.208474	0.190085		94.7157	-1.60049
04_Water-Peptide_2.00	-1.44765	-0.0359987	0.0671387	-0.157622	-0.158622	0.00099965	-1.40721	0.00893489	-0.0493697	-0.048564	0.00148195	-0.00228764	0.0165596		-6.06174	-3.31206		0.986664	0.957317		0.11201	0.108214		103.407	-1.18287
05_MeOH-MeOH_0.90	-2.31366	-1.68613	-0.979664	-4.21946	-5.22584	1.00639	-12.6785	15.0145	-4.64963	-6.91003	4.34641	-2.086	-0.0773668		0.582814	0.265011		0.503536	0.256169		0.332803	0.243503		45.7533	1.52995
05_MeOH-MeOH_0.95	-3.15619	-1.41549	-0.834446	-3.46783	-4.21366	0.745836	-10.3535	10.6059	-3.4085	-4.85273	2.92254	-1.47831	-0.0309134		0.541301	0.258249		0.476034	0.250046		0.334941	0.251985		58.0498	0.568571
05_MeOH-MeOH_1.00	-3.58771	-1.18775	-0.707468	-2.86185	-3.41163	0.549781	-8.55107	7.48045	-2.5171	-3.43915	1.96411	-1.04206	-0.000366305		0.510037	0.253418		0.454352	0.245653		0.334678	0.258566		65.4298	0.00668038
05_MeOH-MeOH_1.05	-3.75027	-0.996492	-0.597326	-2.36962	-2.77269	0.40307	-7.1414	5.2632	-1.87207	-2.45812	1.31781	-0.731764	0.0178455		0.48676	0.250446		0.437664	0.242943		0.331815	0.262898		70.4112	-0.335049
05_MeOH-MeOH_1.10	-3.7394	-0.836888	-0.502764	-1.96949	-2.2639	0.294408	-6.03397	3.69884	-1.40427	-1.77491	0.884078	-0.513443	0.027044		0.470153	0.249411		0.425474	0.241998		0.326401	0.264779		74.0181	-0.535313
05_MeOH-MeOH_1.25	-3.22549	-0.500281	-0.294403	-1.15459	-1.2671	0.112506	-3.87625	1.27487	-0.624117	-0.713587	0.267443	-0.177973	0.0265277		0.452896	0.259069		0.412557	0.25079		0.297864	0.256556		80.7655	-0.664246
05_MeOH-MeOH_1.50	-2.1515	-0.221416	-0.112113	-0.508883	-0.530345	0.0214615	-2.17164	0.213142	-0.193003	-0.19804	0.0371678	-0.0321314	0.00548737		0.525755	0.327717		0.465358	0.31142		0.234332	0.215205		86.7701	-0.221306
05_MeOH-MeOH_2.00	-0.953547	-0.052227	-0.00619816	-0.130344	-0.131026	0.00068211	-0.925959	0.00580857	-0.0333962	-0.0325197	0.00083409	-0.00171057	-0.00712207		1.23096	0.787826		0.776161	0.618846		0.140766	0.135866		93.5681	0.698863
06_MeOH-MeNH2_0.90	-2.65435	-2.39574	-1.67283	-5.70094	-7.27912	1.57817	-17.747	22.322	-7.22941	-11.1766	7.19727	-3.25009	-0.245801		0.401216	0.177682		0.372363	0.174942		0.321235	0.228253		38.0895	3.52721
06_MeOH-MeNH2_0.95	-3.76728	-2.03024	-1.42515	-4.70276	-5.91113	1.20837	-14.5787	16.2652	-5.45382	-8.17982	5.14549	-2.41949	-0.16351		0.360993	0.175115		0.339546	0.17249		0.322579	0.234757		51.0044	2.21372
06_MeOH-MeNH2_1.00	-4.36585	-1.71894	-1.21234	-3.89533	-4.81521	0.919879	-12.0699	11.8394	-4.13541	-6.02894	3.67845	-1.78492	-0.103254		0.328885	0.172826		0.312422	0.170301		0.322732	0.240374		58.9949	1.39525
06_MeOH-MeNH2_1.05	-4.62008	-1.45428	-1.02986	-3.23668	-3.93293	0.69625	-10.0711	8.60136	-3.15033	-4.46902	2.62659	-1.30789	-0.0608617		0.302937	0.170852		0.289926	0.168412		0.321382	0.244805		64.4805	0.84942
06_MeOH-MeNH2_1.10	-4.64693	-1.23072	-0.874364	-2.69853	-3.2233	0.52477	-8.47666	6.24358	-2.41384	-3.33395	1.87508	-0.954972	-0.0324684		0.281911	0.169284		0.271335	0.166909		0.318348	0.247787		68.4935	0.478569
06_MeOH-MeNH2_1.25	-4.06773	-0.74965	-0.533752	-1.59134	-1.81116	0.219817	-5.31785	2.37455	-1.12442	-1.43697	0.68106	-0.368513	0.0018415		0.239938	0.168223		0.233316	0.165892		0.299245	0.247015		76.0424	-0.034425
06_MeOH-MeNH2_1.50	-2.71451	-0.339773	-0.233965	-0.69916	-0.747969	0.0488087	-2.82835	0.469345	-0.355498	-0.406157	0.127156	-0.0764975	-0.00133525		0.218605	0.184419		0.213562	0.18136		0.247197	0.219596		82.5184	0.0405901
06_MeOH-MeNH2_2.00	-1.14654	-0.0850402	-0.0459027	-0.172375	-0.174522	0.00214776	-1.10779	0.0180247	-0.0567709	-0.0569192	0.00458064	-0.00443232	-0.0118697		0.316411	0.29889		0.30167	0.286372		0.155602	0.148017		88.9237	0.920594
07_MeOH-Peptide_0.90	-3.79568	-2.22701	-1.02122	-6.19677	-7.71823	1.52146	-17.6858	20.7996	-6.9095	-10.2272	6.29795	-2.98023	0.0892251		0.907737	0.371214		0.672124	0.34801		0.350381	0.251949		54.5773	-1.28295
07_MeOH-Peptide_0.95	-4.77852	-1.91791	-0.895176	-5.21991	-6.38524	1.16532	-14.7221	15.1709	-5.22733	-7.44005	4.39883	-2.18611	0.126031		0.855583	0.363563		0.650108	0.341682		0.354564	0.261658		64.0074	-1.68816
07_MeOH-Peptide_1.00	-5.28164	-1.6506	-0.779474	-4.41428	-5.30324	0.888959	-12.367	11.0684	-3.98309	-5.46438	3.07665	-1.59536	0.148674		0.816522	0.358477		0.632467	0.33745		0.356941	0.269986		69.8349	-1.9658
07_MeOH-Peptide_1.05	-5.46484	-1.41995	-0.674896	-3.74437	-4.41974	0.675373	-10.4802	8.07051	-3.05515	-4.04744	2.15246	-1.16017	0.159646		0.787419	0.355661		0.618649	0.335097		0.35728	0.276636		73.8488	-2.15737
07_MeOH-Peptide_1.10	-5.43727	-1.22224	-0.58179	-3.18665	-3.69844	0.511791	-8.96362	5.88782	-2.36147	-3.02648	1.50819	-0.843189	0.161666		0.766408	0.355011		0.608302	0.334554		0.35551	0.28138		76.8016	-2.28354
07_MeOH-Peptide_1.25	-4.74375	-0.783745	-0.363833	-1.99803	-2.21787	0.219845	-5.89595	2.29238	-1.14019	-1.33897	0.524187	-0.325402	0.138704		0.741082	0.365912		0.595405	0.343629		0.338882	0.283967		82.4624	-2.41113
07_MeOH-Peptide_1.50	-3.04329	-0.342804	-0.130794	-0.86652	-0.907612	0.0410915	-3.0837	0.375784	-0.335377	-0.35164	0.0716371	-0.0553748	0.0746182		0.829654	0.447658		0.638512	0.408586		0.281	0.253437		88.4094	-2.1677
07_MeOH-Peptide_2.00	-1.03513	-0.0545729	0.00839265	-0.16024	-0.160805	0.00056456	-1.00001	0.00433474	-0.0394551	-0.0385827	0.00064501	-0.00151742	0.0145962		2.46989	1.36347		0.92691	0.806371		0.160238	0.154156		97.0391	-1.36834
08_MeOH-Water_0.90	-2.48133	-1.23835	-0.56058	-3.18704	-3.97497	0.787929	-11.0428	12.3565	-3.79505	-5.37862	3.27866	-1.69509	-0.00194947		0.77163	0.376763		0.610903	0.352569		0.288607	0.214791		57.9451	0.0455249
08_MeOH-Water_0.95	-3.19335	-1.01911	-0.457533	-2.58069	-3.15684	0.576153	-9.06435	8.63068	-2.75968	-3.7455	2.16656	-1.18075	0.0282193		0.747674	0.380307		0.598807	0.355468		0.284708	0.218258		68.7959	-0.607941
08_MeOH-Water_1.00	-3.53742	-0.838285	-0.370051	-2.0982	-2.51727	0.419072	-7.53284	6.01891	-2.02349	-2.63551	1.43101	-0.818986	0.0445932		0.736434	0.387503		0.592986	0.361324		0.27854	0.219561		75.2456	-0.948557
08_MeOH-Water_1.05	-3.6435	-0.689329	-0.296279	-1.71138	-2.01455	0.303169	-6.335	4.18718	-1.49568	-1.87301	0.943686	-0.566349	0.0509569		0.736367	0.398789		0.592951	0.370421		0.270146	0.218548		79.5845	-1.11305
08_MeOH-Water_1.10	-3.59863	-0.567309	-0.234676	-1.40101	-1.6195	0.218487	-5.39223	2.90961	-1.11601	-1.3469	0.622399	-0.391502	0.0507212		0.746934	0.414762		0.598427	0.383116		0.259821	0.215268		82.7291	-1.16603
08_MeOH-Water_1.25	-3.06157	-0.318561	-0.10615	-0.784697	-0.86478	0.0800828	-3.54092	0.970049	-0.490696	-0.540171	0.179375	-0.129901	0.033676		0.847602	0.500131		0.646586	0.447307		0.221608	0.194636		88.6742	-0.975379
08_MeOH-Water_1.50	-2.03774	-0.126356	-0.00837156	-0.32218	-0.336316	0.0141358	-2.0398	0.153454	-0.151389	-0.152529	0.0229753	-0.0218353	0.00622335		1.39135	0.875726		0.812023	0.658814		0.157947	0.147034		94.0679	-0.287288
08_MeOH-Water_2.00	-0.918982	-0.0231162	0.0280179	-0.0743429	-0.0747314	0.00038854	-0.896113	0.00373457	-0.0266035	-0.0260466	0.00044847	-0.00100543	-0.00699683		-16.1668	-10.4319		0.998092	0.995437		0.0829616	0.0805696		99.7725	0.759636
09_MeNH2-MeOH_0.90	0.0500557	-1.4318	-1.1403	-3.30195	-3.9031	0.601145	-5.84062	7.5636	-1.67292	-2.60605	1.74042	-0.807292	0.00492775		0.283758	0.113332		0.272981	0.112611		0.565343	0.439467		-1.98861	-0.19577
09_MeNH2-MeOH_0.95	-0.675257	-1.17367	-0.940115	-2.66593	-3.08757	0.421639	-4.5546	5.06013	-1.18079	-1.73663	1.09135	-0.535512	0.0252803		0.261211	0.110491		0.252731	0.109823		0.585327	0.464821		24.4325	-0.914707
09_MeNH2-MeOH_1.00	-1.08114	-0.964958	-0.776562	-2.16293	-2.45726	0.294331	-3.61844	3.38036	-0.843067	-1.17433	0.685287	-0.354023	0.0344892		0.241977	0.108179		0.23519	0.107552		0.597752	0.484798		38.776	-1.23698
09_MeNH2-MeOH_1.05	-1.28193	-0.795561	-0.642366	-1.76221	-1.96664	0.204428	-2.92634	2.25311	-0.608692	-0.805962	0.430714	-0.233444	0.0366983		0.225522	0.106539		0.219997	0.105939		0.602189	0.498499		47.7769	-1.36773
09_MeNH2-MeOH_1.10	-1.35306	-0.658169	-0.532306	-1.44247	-1.58394	0.141467	-2.40837	1.5003	-0.444997	-0.562422	0.271358	-0.153933	0.0347912		0.211674	0.105725		0.207086	0.105139		0.598939	0.505531		53.9338	-1.3868
09_MeNH2-MeOH_1.25	-1.21478	-0.380427	-0.305587	-0.812865	-0.858721	0.0458558	-1.46729	0.440218	-0.187713	-0.211428	0.0682842	-0.0445692	0.020827		0.184911	0.109094		0.181828	0.108451		0.553992	0.491157		64.6171	-1.10784
09_MeNH2-MeOH_1.50	-0.78697	-0.164151	-0.125599	-0.343591	-0.350171	0.00657963	-0.786083	0.056389	-0.0572759	-0.0579518	0.00692385	-0.00624785	0.00491281		0.185819	0.133053		0.182692	0.13189		0.437092	0.407408		73.4246	-0.458367
09_MeNH2-MeOH_2.00	-0.331234	-0.0397106	-0.0243687	-0.0850895	-0.085218	0.00012849	-0.321603	0.00091047	-0.0105407	-0.0103081	9.738e-05	-0.00033001	-0.00149167		0.327878	0.239421		0.311559	0.23284		0.264579	0.256183		83.4753	0.37592
10_MeNH2-MeNH2_0.90	0.781968	-2.28475	-1.99013	-5.07059	-6.07284	1.00225	-8.70459	12.2059	-2.71936	-4.18358	2.752	-1.28778	-0.229742		0.186136	0.0689189		0.182993	0.0687558		0.582519	0.443856		-21.0057	6.17145
10_MeNH2-MeNH2_0.95	-0.362179	-1.88545	-1.64759	-4.11487	-4.84021	0.725343	-6.79383	8.38442	-1.95278	-2.85806	1.79384	-0.888554	-0.157623		0.164682	0.0673245		0.162493	0.0671724		0.605677	0.470453		8.93642	3.88921
10_MeNH2-MeNH2_1.00	-1.04291	-1.55842	-1.36603	-3.35188	-3.87327	0.52139	-5.37809	5.74772	-1.41254	-1.97305	1.16887	-0.608351	-0.107738		0.146156	0.0657867		0.14462	0.0656448		0.623247	0.493603		25.5923	2.64381
10_MeNH2-MeNH2_1.05	-1.41756	-1.29011	-1.13407	-2.73894	-3.11121	0.372278	-4.31766	3.92921	-1.0291	-1.37637	0.761282	-0.414012	-0.0737442		0.12984	0.0643682		0.128759	0.0642352		0.634356	0.51226		36.204	1.8834
10_MeNH2-MeNH2_1.10	-1.59183	-1.0706	-0.943415	-2.24635	-2.51083	0.264477	-3.51741	2.68183	-0.756249	-0.971945	0.496563	-0.280867	-0.0510655		0.115358	0.06315		0.114598	0.0630244		0.638637	0.525626		43.5294	1.39641
10_MeNH2-MeNH2_1.25	-1.53272	-0.622057	-0.55039	-1.26688	-1.35928	0.0924022	-2.0601	0.844603	-0.317222	-0.369488	0.139145	-0.0868792	-0.0210236		0.0805434	0.061126		0.0802834	0.0610121		0.614961	0.532903		56.222	0.771171
10_MeNH2-MeNH2_1.50	-0.880358	-0.218196	-0.191237	-0.425697	-0.434848	0.00915087	-0.883082	0.0712979	-0.0685744	-0.0707259	0.00977247	-0.00762095	-0.0120617		0.0397236	0.0658447		0.0396923	0.0657024		0.482059	0.447322		67.6235	0.926501
10_MeNH2-MeNH2_2.00	-0.309302	-0.046242	-0.0382095	-0.0875714	-0.0876906	0.00011924	-0.300184	0.00076677	-0.0098847	-0.00979387	9.184e-05	-0.00018268	-0.00700371		0.0369431	0.0951138		0.0369179	0.0946864		0.291725	0.282425		77.1794	1.74762
11_MeNH2-Peptide_0.90	0.275457	-2.75332	-2.15253	-6.57797	-7.79	1.21203	-10.1779	13.4404	-2.98699	-5.00428	3.30963	-1.29234	-0.170711		0.340843	0.122464		0.322618	0.121556		0.646297	0.499659		-5.73737	3.55565
11_MeNH2-Peptide_0.95	-0.931628	-2.32434	-1.8088	-5.49156	-6.38582	0.89426	-8.16917	9.4778	-2.24026	-3.51931	2.19588	-0.916835	-0.105292		0.328665	0.124733		0.312234	0.123774		0.67223	0.527556		18.0197	2.03658
11_MeNH2-Peptide_1.00	-1.65859	-1.96529	-1.52106	-4.59921	-5.25657	0.657363	-6.64937	6.68383	-1.69305	-2.50615	1.46083	-0.64773	-0.0597129		0.319204	0.12742		0.304088	0.126398		0.691675	0.551304		31.8674	1.1473
11_MeNH2-Peptide_1.05	-2.06231	-1.66371	-1.27948	-3.86162	-4.34289	0.481268	-5.48321	4.70866	-1.28775	-1.80534	0.973568	-0.455988	-0.0286953		0.312054	0.130549		0.297887	0.12945		0.704263	0.570321		40.966	0.570007
11_MeNH2-Peptide_1.10	-2.24984	-1.41085	-1.07704	-3.25175	-3.60308	0.351328	-4.57982	3.31632	-0.986336	-1.31641	0.650571	-0.320502	-0.00835328		0.307032	0.134174		0.29351	0.132982		0.710018	0.584201		47.4041	0.176004
11_MeNH2-Peptide_1.25	-1.94972	-0.670907	-0.487215	-1.51909	-1.59784	0.0787487	-2.28159	0.645823	-0.313955	-0.353463	0.101797	-0.0622897	0.0181535		0.311682	0.158612		0.297564	0.156654		0.665803	0.585268		63.1041	-0.58755
11_MeNH2-Peptide_1.50	-1.02561	-0.21383	-0.132162	-0.496681	-0.502695	0.00601413	-0.998744	0.0413874	-0.0682549	-0.0683395	0.00491939	-0.00483474	0.0120296		0.435528	0.23604		0.399301	0.229727		0.497306	0.465494		75.4362	-0.88481
11_MeNH2-Peptide_2.00	-0.401499	-0.0407434	-0.0103394	-0.112169	-0.112243	7.352e-05	-0.389994	0.00039777	-0.0119035	-0.0117765	3.862e-05	-0.00016564	0.00392448		1.19583	0.595191		0.767124	0.511454		0.287618	0.279099		89.489	-0.874716
12_MeNH2-Water_0.90	-3.17292	-2.03611	-1.37523	-4.91743	-6.24876	1.33133	-16.8874	20.3742	-6.65976	-9.90786	6.12779	-2.87968	-0.326854		0.441494	0.19373		0.403884	0.190194		0.291189	0.208833		45.9104	4.72939
12_MeNH2-Water_0.95	-4.15074	-1.71899	-1.16745	-4.02771	-5.03833	1.01063	-13.9016	14.7388	-4.98791	-7.20313	4.33935	-2.12414	-0.244397		0.395389	0.19108		0.367691	0.187684		0.289729	0.213224		57.0033	3.35638
12_MeNH2-Water_1.00	-4.64429	-1.4491	-0.988619	-3.31129	-4.07352	0.762233	-11.5372	10.6477	-3.75488	-5.27365	3.07163	-1.55286	-0.182386		0.358355	0.188898		0.337348	0.185616		0.287011	0.216537		63.9322	2.51068
12_MeNH2-Water_1.05	-4.81688	-1.22002	-0.835211	-2.72974	-3.30099	0.571251	-9.65236	7.67529	-2.8398	-3.88324	2.17101	-1.12757	-0.136742		0.32819	0.187234		0.311826	0.184036		0.282805	0.218516		68.7257	1.95099
12_MeNH2-Water_1.10	-4.78081	-1.02699	-0.704587	-2.25712	-2.68322	0.426099	-8.1471	5.52661	-2.16032	-2.87812	1.53368	-0.815883	-0.103915		0.303507	0.18619		0.290425	0.183045		0.277046	0.21898		72.258	1.57059
12_MeNH2-Water_1.25	-4.0898	-0.614425	-0.419865	-1.29608	-1.46862	0.172538	-5.15359	2.04914	-0.985358	-1.21816	0.539141	-0.306338	-0.0530809		0.25311	0.18811		0.245372	0.184867		0.251491	0.211124		78.9968	1.02529
12_MeNH2-Water_1.50	-2.68028	-0.269652	-0.17448	-0.543477	-0.579489	0.036012	-2.7656	0.387043	-0.301715	-0.336051	0.0949572	-0.0606215	-0.0327725		0.223684	0.214288		0.21829	0.209531		0.196513	0.177183		84.8946	1.03803
12_MeNH2-Water_2.00	-1.11724	-0.0636434	-0.0288039	-0.122904	-0.12428	0.00137592	-1.08516	0.0135748	-0.0456517	-0.0456833	0.00307833	-0.0030467	-0.0221908		0.329445	0.376858		0.312902	0.352647		0.113258	0.108686		90.694	1.80138
13_Peptide-MeOH_0.90	-1.59405	-2.23049	-1.6291	-5.28928	-6.26202	0.972745	-11.2278	13.4087	-3.77497	-5.31447	3.2678	-1.72829	-0.134209		0.370425	0.155817		0.347359	0.153959		0.471088	0.352554		28.5271	2.4018
13_Peptide-MeOH_0.95	-2.63574	-1.88062	-1.37468	-4.41014	-5.13149	0.721355	-9.25119	9.40555	-2.7901	-3.73066	2.15739	-1.21683	-0.0756927		0.354756	0.15542		0.334341	0.153577		0.47671	0.366251		44.1739	1.26858
13_Peptide-MeOH_1.00	-3.22963	-1.5884	-1.15864	-3.69294	-4.22518	0.532237	-7.73582	6.59309	-2.08689	-2.6585	1.42612	-0.854513	-0.0370784		0.344335	0.156445		0.325575	0.154565		0.477382	0.37596		53.7041	0.616561
13_Peptide-MeOH_1.05	-3.52382	-1.34365	-0.975076	-3.10315	-3.49388	0.390734	-6.55923	4.61466	-1.57925	-1.92312	0.943422	-0.599548	-0.0129175		0.338299	0.158955		0.320458	0.156985		0.473096	0.381293		60.18	0.220607
13_Peptide-MeOH_1.10	-3.61892	-1.13904	-0.819642	-2.61746	-2.90335	0.285882	-5.6376	3.22916	-1.21048	-1.41461	0.62568	-0.421551	0.00108557		0.33634	0.163068		0.318791	0.160942		0.464287	0.382219		64.8957	-0.0194669
13_Peptide-MeOH_1.25	-3.31474	-0.702658	-0.482392	-1.60355	-1.71358	0.110029	-3.83225	1.10451	-0.587006	-0.622284	0.185225	-0.149947	0.0117977		0.353149	0.185871		0.332994	0.182741		0.418436	0.362855		73.858	-0.262872
13_Peptide-MeOH_1.50	-2.38812	-0.326948	-0.189301	-0.75804	-0.779458	0.0214182	-2.35314	0.184693	-0.219667	-0.214231	0.0251567	-0.0305924	0.00434771		0.468361	0.266629		0.424145	0.257629		0.322139	0.294635		82.3484	-0.14992
13_Peptide-MeOH_2.00	-1.21233	-0.0795816	-0.00962542	-0.214777	-0.21552	0.00074273	-1.16408	0.00514773	-0.0533986	-0.0512527	0.00054199	-0.00268782	-0.00311867		1.40762	0.7842		0.815222	0.617085		0.184504	0.176412		92.9234	0.239041
14_Peptide-MeNH2_0.90	-1.50421	-2.8636	-2.32315	-6.53269	-8.03883	1.50614	-15.4846	19.8838	-5.90334	-8.8632	5.79392	-2.83405	-0.311278		0.259495	0.104198		0.251176	0.103637		0.421882	0.305437		21.4818	4.44541
14_Peptide-MeNH2_0.95	-2.78256	-2.43178	-1.97947	-5.44522	-6.59586	1.15064	-12.684	14.3442	-4.44271	-6.44694	4.09165	-2.08743	-0.212168		0.234393	0.102536		0.228208	0.102001		0.429297	0.317937		37.5718	2.86482
14_Peptide-MeNH2_1.00	-3.53742	-2.06606	-1.68618	-4.55818	-5.43144	0.873256	-10.5048	10.3362	-3.3689	-4.73155	2.88791	-1.52526	-0.140563		0.21479	0.101241		0.21	0.100726		0.433916	0.328549		47.6085	1.89178
14_Peptide-MeNH2_1.05	-3.93465	-1.75608	-1.43569	-3.82827	-4.48682	0.658548	-8.79511	7.43386	-2.5734	-3.5012	2.03602	-1.10822	-0.0900864		0.199419	0.10038		0.195569	0.0998781		0.435272	0.336743		54.5229	1.24834
14_Peptide-MeNH2_1.10	-4.08901	-1.4944	-1.22255	-3.22649	-3.7208	0.494311	-7.44856	5.34216	-1.9826	-2.61511	1.43587	-0.803362	-0.0555369		0.187541	0.100057		0.184327	0.0995599		0.433169	0.342109		59.5936	0.809399
14_Peptide-MeNH2_1.25	-3.80387	-0.928851	-0.755156	-1.96727	-2.17146	0.20419	-4.82177	1.97253	-0.954622	-1.15389	0.505285	-0.306014	-0.00855673		0.168207	0.103144		0.165876	0.1026		0.407997	0.34057		69.2061	0.155678
14_Peptide-MeNH2_1.50	-2.72341	-0.436384	-0.338608	-0.91636	-0.96068	0.0443201	-2.7594	0.371519	-0.335531	-0.360374	0.0897891	-0.0649455	-0.000746285		0.182412	0.126164		0.179451	0.125172		0.332086	0.296084		77.8307	0.0213276
14_Peptide-MeNH2_2.00	-1.31361	-0.111753	-0.0640496	-0.24976	-0.251656	0.00189551	-1.25644	0.0130035	-0.0701756	-0.0683086	0.00295332	-0.00482028	-0.0086209		0.420687	0.271346		0.38777	0.261877		0.198784	0.188269		87.689	0.575481
15_Peptide-Peptide_0.90	-2.8008	-2.85494	-1.92924	-7.36125	-8.82979	1.46854	-15.7842	18.7788	-5.79537	-8.21556	4.97369	-2.5535	-0.00457884		0.538665	0.193492		0.474239	0.189968		0.466368	0.341121		36.9033	0.0603308
15_Peptide-Peptide_0.95	-4.00129	-2.45428	-1.65889	-6.25243	-7.37551	1.12308	-13.1632	13.5837	-4.42177	-5.99674	3.4404	-1.86543	0.0553311		0.5201	0.193376		0.461423	0.189859		0.474993	0.355555		49.6492	-0.686564
15_Peptide-Peptide_1.00	-4.69375	-2.11249	-1.42448	-5.33217	-6.18746	0.855289	-11.1137	9.83077	-3.4108	-4.43754	2.3854	-1.35867	0.0942767		0.507553	0.19452		0.452593	0.190941		0.479783	0.367115		57.688	-1.1587
15_Peptide-Peptide_1.05	-5.0392	-1.8203	-1.22132	-4.56181	-5.21046	0.648649	-9.49341	7.11252	-2.6583	-3.32663	1.65669	-0.988355	0.117188		0.499796	0.196928		0.447068	0.193217		0.480524	0.375405		63.2777	-1.47154
15_Peptide-Peptide_1.10	-5.1486	-1.57126	-1.04617	-3.91587	-4.40651	0.490637	-8.20395	5.15018	-2.09483	-2.52888	1.15421	-0.720164	0.128356		0.496075	0.200613		0.444399	0.196694		0.477316	0.380227		67.4106	-1.68057
15_Peptide-Peptide_1.25	-4.74683	-1.02062	-0.652555	-2.51998	-2.7295	0.209521	-5.61991	1.96356	-1.09048	-1.20348	0.39742	-0.284414	0.123786		0.506104	0.21998		0.451566	0.214843		0.448402	0.375534		75.3918	-1.96604
15_Peptide-Peptide_1.50	-3.49184	-0.512085	-0.284345	-1.27412	-1.32317	0.0490503	-3.45141	0.399615	-0.440046	-0.442492	0.0703862	-0.0679399	0.0832908		0.599792	0.285951		0.514365	0.274932		0.36916	0.327415		83.0406	-1.98077
15_Peptide-Peptide_2.00	-1.6218	-0.111516	-0.0124261	-0.325266	-0.326716	0.00144939	-1.53772	0.00956516	-0.0936392	-0.0897349	0.00135706	-0.00526139	0.0282738		1.62434	0.799485		0.851564	0.62445		0.211525	0.199383		94.4297	-1.64625
16_Peptide-Water_0.90	-2.28297	-1.35687	-0.786511	-3.4355	-4.12139	0.685888	-9.51799	10.1686	-2.93361	-3.83597	2.18735	-1.28499	0.00526197		0.602844	0.266102		0.516285	0.257154		0.360949	0.275909		51.6382	-0.11902
16_Peptide-Water_0.95	-3.06632	-1.11517	-0.630537	-2.80769	-3.30491	0.497224	-7.90901	6.99782	-2.15513	-2.67442	1.40286	-0.883567	0.0355036		0.608338	0.277614		0.519724	0.267498		0.354998	0.278979		64.1956	-0.743294
16_Peptide-Water_1.00	-3.47368	-0.917935	-0.501516	-2.30584	-2.66436	0.358519	-6.67952	4.81116	-1.60532	-1.89964	0.901012	-0.606696	0.0513651		0.624461	0.293366		0.52967	0.281503		0.345211	0.278321		71.7441	-1.06088
16_Peptide-Water_1.05	-3.63521	-0.756415	-0.394817	-1.9011	-2.15815	0.257051	-5.72447	3.30103	-1.21178	-1.37432	0.579011	-0.41647	0.0576018		0.651357	0.314097		0.545788	0.299662		0.3321	0.274081		76.8732	-1.2181
16_Peptide-Water_1.10	-3.63823	-0.624379	-0.30703	-1.57412	-1.75769	0.183561	-4.97375	2.26332	-0.927802	-1.01414	0.372988	-0.286645	0.0577913		0.690047	0.340719		0.567951	0.322513		0.316487	0.266731		80.6373	-1.28088
16_Peptide-Water_1.25	-3.20845	-0.354179	-0.127432	-0.915346	-0.980744	0.0653982	-3.48342	0.726386	-0.451423	-0.456599	0.101119	-0.0959427	0.0439407		0.900591	0.470809		0.669208	0.425961		0.262772	0.232626		87.9963	-1.20514
16_Peptide-Water_1.50	-2.27622	-0.140526	0.00673677	-0.402945	-0.414004	0.0110596	-2.21328	0.10837	-0.171316	-0.165109	0.011839	-0.0180461	0.0202636		2.01179	1.10071		0.895474	0.740155		0.182058	0.168978		95.2495	-0.847941
16_Peptide-Water_2.00	-1.168	-0.0190647	0.0582677	-0.104463	-0.104757	0.00029377	-1.12866	0.00235382	-0.0416956	-0.0404246	0.00018473	-0.00145577	0.00178801		-3.66468	-1.97261		0.964728	0.891937		0.0925549	0.0892575		103.637	-0.158651
17_Uracil-Uracil_BP_0.90	-9.85025	-4.1311	-0.900001	-11.6501	-14.5001	2.84998	-37.7351	47.2509	-19.3661	-23.8714	13.1439	-8.63856	0.213732		1.31562	0.642225		0.796124	0.540381		0.308734	0.204026		67.1564	-1.45717
17_Uracil-Uracil_BP_0.95	-11.8425	-3.52039	-0.724883	-9.74867	-11.9589	2.21024	-31.7125	34.6188	-14.7487	-17.6931	9.35208	-6.40774	0.319696		1.29636	0.658499		0.791796	0.549969		0.307408	0.209824		75.1043	-2.02749
17_Uracil-Uracil_BP_1.00	-12.8276	-2.99733	-0.568345	-8.19823	-9.90145	1.70322	-26.862	25.3376	-11.3031	-13.2338	6.65617	-4.72555	0.389978		1.29921	0.681213		0.792444	0.562995		0.305198	0.214809		80.156	-2.43686
17_Uracil-Uracil_BP_1.05	-13.1307	-2.55076	-0.431322	-6.92206	-8.22657	1.30451	-22.9273	18.5096	-8.71307	-9.9781	4.73464	-3.46961	0.430306		1.32122	0.710724		0.79736	0.579314		0.301913	0.218773		83.7285	-2.74387
17_Uracil-Uracil_BP_1.10	-12.9801	-2.17251	-0.31391	-5.86964	-6.86449	0.994847	-19.7289	13.5129	-6.7641	-7.59093	3.37037	-2.54355	0.446726		1.36068	0.7475		0.805792	0.598718		0.297515	0.221554		86.42	-2.97425
17_Uracil-Uracil_BP_1.25	-11.2069	-1.35449	-0.0619832	-3.66148	-4.09389	0.432418	-13.1422	5.23848	-3.30318	-3.52114	1.22176	-1.00379	0.41093		1.58492	0.912482		0.845731	0.674043		0.278604	0.222644		91.7662	-3.36485
17_Uracil-Uracil_BP_1.50	-7.55728	-0.641431	0.134554	-1.78549	-1.88846	0.102975	-7.48086	1.07297	-1.14939	-1.15668	0.229787	-0.222499	0.277131		2.52253	1.53091		0.929617	0.837216		0.238674	0.206887		97.0496	-3.55889
17_Uracil-Uracil_BP_2.00	-3.26288	-0.167864	0.189147	-0.540587	-0.545938	0.00535074	-3.08452	0.045486	-0.223848	-0.216064	0.00854877	-0.0163337	0.114359		-26.3999	-16.7745		0.999283	0.998228		0.175258	0.1634		104.337	-3.65688
18_Water-Pyridine_0.90	-3.26891	-1.74773	-1.25142	-4.56496	-5.79104	1.22609	-15.3725	18.1722	-6.06855	-8.69604	5.20298	-2.57549	-0.213051		0.522083	0.165484		0.462806	0.163263		0.296955	0.212907		50.4375	3.28725
18_Water-Pyridine_0.95	-4.13339	-1.47451	-1.07089	-3.74547	-4.67117	0.925697	-12.6546	13.0493	-4.52811	-6.28257	3.63099	-1.87653	-0.148365		0.471466	0.158568		0.426447	0.156612		0.295978	0.217979		60.5434	2.17316
18_Water-Pyridine_1.00	-4.55376	-1.24271	-0.914796	-3.08598	-3.78023	0.694257	-10.5104	9.3563	-3.39963	-4.57604	2.53349	-1.35708	-0.101966		0.430344	0.151988		0.395294	0.150262		0.293611	0.221852		66.837	1.49659
18_Water-Pyridine_1.05	-4.68164	-1.0466	-0.780287	-2.55074	-3.06801	0.517273	-8.80673	6.69238	-2.56729	-3.35656	1.76537	-0.976105	-0.0699334		0.396223	0.145774		0.368362	0.14425		0.289636	0.22426		71.1662	1.06307
18_Water-Pyridine_1.10	-4.62103	-0.881925	-0.665296	-2.11575	-2.49928	0.383528	-7.44946	4.78099	-1.95255	-2.4819	1.22986	-0.700517	-0.0488644		0.367455	0.140012		0.344907	0.138659		0.284015	0.225032		74.3276	0.785965
18_Water-Pyridine_1.25	-3.92393	-0.531832	-0.412553	-1.23072	-1.38328	0.152559	-4.75703	1.73034	-0.89724	-1.05432	0.415637	-0.25856	-0.0237734		0.303193	0.126303		0.29015	0.125308		0.258715	0.217661		80.2097	0.485955
18_Water-Pyridine_1.50	-2.57633	-0.239767	-0.18851	-0.533173	-0.564203	0.0310297	-2.60438	0.313409	-0.285366	-0.303458	0.0691658	-0.0510736	-0.0224177		0.244926	0.119682		0.237894	0.118834		0.204722	0.184505		85.111	0.740585
18_Water-Pyridine_2.00	-1.10571	-0.0604536	-0.0428972	-0.131006	-0.132122	0.00111573	-1.06688	0.0100049	-0.0488342	-0.0478879	0.00196796	-0.00291419	-0.0202242		0.267589	0.169872		0.258494	0.167473		0.122794	0.117419		89.9474	1.6452
19_MeOH-Pyridine_0.90	-2.65548	-2.3326	-1.74341	-5.84967	-7.36362	1.51396	-16.8389	21.1957	-7.01225	-10.5412	6.59094	-3.06201	-0.297202		0.435146	0.144551		0.399006	0.143064		0.34739	0.245257		37.7806	4.22841
19_MeOH-Pyridine_0.95	-3.73924	-1.98933	-1.5097	-4.86177	-6.01986	1.1581	-13.8214	15.353	-5.27085	-7.64792	4.6398	-2.26274	-0.210312		0.389461	0.137075		0.362909	0.135805		0.351756	0.254646		50.2007	2.82351
19_MeOH-Pyridine_1.00	-4.32199	-1.69538	-1.3055	-4.0584	-4.93838	0.879974	-11.4405	11.1037	-3.98515	-5.59235	3.26478	-1.65758	-0.145876		0.352405	0.129922		0.33237	0.128839		0.354739	0.263094		57.8677	1.95316
19_MeOH-Pyridine_1.05	-4.56868	-1.44424	-1.12761	-3.39932	-4.06357	0.664254	-9.55013	8.01107	-3.02962	-4.117	2.29396	-1.20658	-0.0996061		0.321741	0.123114		0.306278	0.122191		0.355945	0.270222		63.1021	1.37575
19_MeOH-Pyridine_1.10	-4.59316	-1.23115	-0.973802	-2.85768	-3.35663	0.498946	-8.04671	5.7724	-2.31885	-3.05449	1.61139	-0.875751	-0.0676986		0.296029	0.116714		0.283852	0.115927		0.355137	0.27569		66.899	0.986024
19_MeOH-Pyridine_1.25	-4.02226	-0.768865	-0.628279	-1.73106	-1.9373	0.206235	-5.08046	2.14225	-1.08404	-1.30831	0.557893	-0.333625	-0.0252753		0.238999	0.100624		0.232453	0.100118		0.340729	0.280811		73.8751	0.46422
19_MeOH-Pyridine_1.50	-2.69712	-0.367014	-0.308406	-0.801084	-0.845786	0.0447022	-2.74789	0.403915	-0.353147	-0.380252	0.0965685	-0.0694634	-0.0191139		0.186052	0.0867727		0.182914	0.0864478		0.291527	0.258328		79.5223	0.563557
19_MeOH-Pyridine_2.00	-1.1691	-0.102769	-0.0837338	-0.21971	-0.221554	0.00184355	-1.12035	0.0139153	-0.0626596	-0.0610969	0.00300343	-0.00456616	-0.0203014		0.178054	0.102064		0.175297	0.101536		0.196108	0.185721		84.9696	1.4755
20_AcOH-AcOH_0.90	-12.8985	-3.39761	0.0770087	-12.139	-15.6412	3.50225	-45.9206	60.2933	-27.2712	-34.3798	19.2517	-12.1431	0.319062		2.65566	1.04638		0.93585	0.722948		0.264347	0.165852		81.1224	-2.00667
20_AcOH-AcOH_0.95	-14.7488	-2.93656	0.0538609	-10.1326	-12.8895	2.75686	-38.8404	44.9927	-20.9011	-25.7448	14.0263	-9.18263	0.38325		2.51499	1.03737		0.929238	0.719955		0.260879	0.169608		85.509	-2.22196
20_AcOH-AcOH_1.00	-15.5366	-2.52462	0.0556339	-8.49302	-10.6509	2.15788	-33.011	33.5518	-16.0775	-19.4086	10.2243	-6.89318	0.428197		2.43988	1.04507		0.925299	0.722514		0.257279	0.173015		88.3897	-2.43607
20_AcOH-AcOH_1.05	-15.6199	-2.1609	0.0709259	-7.14148	-8.82122	1.67974	-28.1956	24.9816	-12.4059	-14.7094	7.44745	-5.1439	0.454142		2.41702	1.06787		0.924037	0.729923		0.253283	0.175892		90.5201	-2.63183
20_AcOH-AcOH_1.10	-15.2475	-1.84472	0.0924106	-6.0264	-7.32896	1.30256	-24.2259	18.5937	-9.61531	-11.2143	5.42565	-3.82666	0.462725		2.43912	1.10547		0.925257	0.741599		0.248758	0.178078		92.2019	-2.7981
20_AcOH-AcOH_1.25	-12.8788	-1.1388	0.157966	-3.68793	-4.28422	0.596284	-15.9212	7.64444	-4.6021	-5.13299	2.09325	-1.56236	0.416524		2.76	1.32211		0.940191	0.797555		0.231637	0.179695		95.8022	-3.09842
20_AcOH-AcOH_1.50	-8.53361	-0.510231	0.215869	-1.71929	-1.87514	0.155854	-8.78392	1.7358	-1.48549	-1.56176	0.430129	-0.353865	0.270472		4.84073	2.46669		0.979322	0.926741		0.195731	0.167418		99.7208	-3.16065
20_AcOH-AcOH_2.00	-3.5655	-0.10395	0.194196	-0.459462	-0.469192	0.00973044	-3.43268	0.0910606	-0.223876	-0.221326	0.0188989	-0.0214481	0.0975465		-6.09121	-3.3037		0.98679	0.957115		0.133849	0.125654		105.56	-2.88795
21_AcNH2-AcNH2_0.90	-9.51855	-3.27197	-1.09049	-10.2036	-12.9923	2.78868	-36.332	43.8659	-17.0524	-21.5201	12.2034	-7.73573	0.315281		1.33896	0.500057		0.80121	0.447255		0.280844	0.191135		70.1662	-2.3241
21_AcNH2-AcNH2_0.95	-11.395	-2.75365	-0.886558	-8.43549	-10.5789	2.14343	-30.3748	31.8891	-12.9094	-15.8423	8.61562	-5.68267	0.380397		1.31731	0.512908		0.796499	0.456378		0.277714	0.194886		77.756	-2.59572
21_AcNH2-AcNH2_1.00	-12.3118	-2.31347	-0.708485	-7.00743	-8.64545	1.63801	-25.6374	23.1684	-9.84282	-11.7783	6.08743	-4.15199	0.416663		1.31884	0.531108		0.796837	0.469058		0.273329	0.197503		82.5349	-2.79319
21_AcNH2-AcNH2_1.05	-12.5844	-1.94119	-0.555476	-5.84348	-7.08836	1.24488	-21.8384	16.8085	-7.5546	-8.83388	4.30077	-3.02149	0.429332		1.34051	0.555026		0.801542	0.485289		0.267578	0.198805		85.8902	-2.93025
21_AcNH2-AcNH2_1.10	-12.4323	-1.62888	-0.426158	-4.8929	-5.83546	0.942557	-18.7809	12.192	-5.84342	-6.68964	3.04242	-2.19621	0.424163		1.38093	0.585255		0.809938	0.505108		0.260526	0.198702		88.4032	-3.01612
21_AcNH2-AcNH2_1.25	-10.7543	-0.965415	-0.152044	-2.93432	-3.33614	0.401824	-12.5719	4.64681	-2.82917	-3.06982	1.08613	-0.845479	0.353322		1.62588	0.727875		0.851785	0.58849		0.233402	0.190526		93.366	-3.06745
21_AcNH2-AcNH2_1.50	-7.366	-0.409097	0.0643272	-1.33603	-1.42921	0.0931727	-7.32654	0.935393	-0.974856	-0.99567	0.201047	-0.180232	0.214803		2.87515	1.37316		0.944502	0.808361		0.182355	0.160941		98.2662	-2.86558
21_AcNH2-AcNH2_2.00	-3.01564	-0.0494394	0.138688	-0.293084	-0.295935	0.00285078	-2.89243	0.023523	-0.146727	-0.142904	0.004268	-0.00809135	0.0684663		-4.2839	-2.1079		0.97382	0.903486		0.101328	0.0964358		105.519	-2.39567
22_AcOH-Uracil_0.90	-12.8263	-3.71249	-0.298952	-11.8769	-15.0719	3.19496	-43.477	54.3896	-23.739	-29.4503	16.251	-10.5397	0.285885		1.96077	0.85095		0.890834	0.648069		0.273178	0.176698		77.4916	-1.72721
22_AcOH-Uracil_0.95	-14.7679	-3.17757	-0.212101	-9.94164	-12.4478	2.50613	-36.9204	40.4096	-18.2571	-22.0724	11.7624	-7.94714	0.376134		1.93292	0.874855		0.888178	0.658443		0.269273	0.180176		83.0523	-2.11532
22_AcOH-Uracil_1.00	-15.6693	-2.71009	-0.124472	-8.35873	-10.313	1.95429	-31.5571	29.9982	-14.1104	-16.6741	8.51739	-5.95372	0.438455		1.94886	0.912175		0.889709	0.67392		0.264877	0.183035		86.7365	-2.42704
22_AcOH-Uracil_1.05	-15.8689	-2.30433	-0.0418137	-7.05246	-8.56774	1.51529	-27.1465	22.2316	-10.954	-12.6802	6.16371	-4.43747	0.475814		2.00598	0.964355		0.89496	0.694162		0.259793	0.185102		89.4565	-2.68227
22_AcOH-Uracil_1.10	-15.6039	-1.95613	0.0324156	-5.9731	-7.14333	1.17022	-23.5194	16.4676	-8.55208	-9.7149	4.46251	-3.2997	0.491728		2.10498	1.0337		0.903256	0.718726		0.253965	0.186243		91.5943	-2.88643
22_AcOH-Uracil_1.25	-13.4697	-1.19027	0.198012	-3.70159	-4.23025	0.528655	-15.9249	6.66862	-4.21343	-4.55701	1.69509	-1.35151	0.456243		2.73047	1.39911		0.939007	0.813559		0.23244	0.183808		96.1729	-3.25755
22_AcOH-Uracil_1.50	-9.26931	-0.517243	0.320122	-1.7715	-1.90635	0.134851	-9.28562	1.47316	-1.45685	-1.48666	0.342541	-0.312726	0.315537		7.98688	4.24797		0.992253	0.973393		0.190779	0.164906		101.294	-3.44815
22_AcOH-Uracil_2.00	-4.22165	-0.0860186	0.304998	-0.505588	-0.513595	0.00800678	-4.03062	0.0727644	-0.263795	-0.256934	0.0146978	-0.0215589	0.136762		-3.30884	-1.78563		0.957239	0.872496		0.125437	0.117732		109.202	-3.53764
23_AcNH2-Uracil_0.90	-12.3598	-3.71123	-0.653239	-11.3069	-14.2699	2.963	-41.0418	48.9495	-20.2675	-24.9728	13.774	-9.06875	0.259491		1.59068	0.700656		0.846602	0.573823		0.275498	0.184425		75.0681	-1.57604
23_AcNH2-Uracil_0.95	-14.3017	-3.15813	-0.480561	-9.46799	-11.7884	2.32043	-34.9229	36.2675	-15.6463	-18.7528	9.94484	-6.83837	0.353282		1.60203	0.735861		0.8483	0.592687		0.271111	0.187228		81.3192	-2.00876
23_AcNH2-Uracil_1.00	-15.2692	-2.68056	-0.325715	-7.96507	-9.77143	1.80636	-29.963	26.8501	-12.1562	-14.2149	7.18565	-5.12693	0.416798		1.64948	0.78331		0.855126	0.616651		0.26583	0.189108		85.5002	-2.33387
23_AcNH2-Uracil_1.05	-15.5678	-2.26998	-0.190061	-6.72551	-8.12359	1.39808	-25.9131	19.8456	-9.50029	-10.8647	5.19162	-3.82717	0.454186		1.7339	0.845481		0.866257	0.645643		0.259541	0.189915		88.586	-2.58447
23_AcNH2-Uracil_1.10	-15.4143	-1.92007	-0.0738127	-5.70153	-6.77924	1.07771	-22.5995	14.6621	-7.47695	-8.37986	3.75553	-2.85263	0.470126		1.85951	0.925961		0.880723	0.679422		0.252286	0.189568		91.0039	-2.77556
23_AcNH2-Uracil_1.25	-13.5941	-1.15673	0.173876	-3.54606	-4.03012	0.484058	-15.6891	5.89495	-3.8	-4.04802	1.4311	-1.18307	0.438132		2.60793	1.35382		0.933711	0.80436		0.226021	0.181951		96.1473	-3.09879
23_AcNH2-Uracil_1.50	-9.71824	-0.48917	0.357374	-1.71041	-1.83254	0.122127	-9.60046	1.289	-1.40678	-1.41538	0.29444	-0.285841	0.308832		11.9777	6.42314		0.996533	0.988097		0.17816	0.15539		101.855	-3.23683
23_AcNH2-Uracil_2.00	-4.81242	-0.0616794	0.3699	-0.497491	-0.504607	0.00711614	-4.57929	0.062757	-0.295893	-0.285322	0.013235	-0.0238062	0.142613		-2.61407	-1.40023		0.933992	0.813778		0.108639	0.102046		110.336	-3.26975
24_Benzene-Benzene_pi-pi_0.90	13.2862	-7.7362	-8.84777	-17.0446	-20.9515	3.90697	-8.94632	24.3924	-2.15986	-12.1445	11.702	-1.71735	-3.84502		0.0277731	-0.0670268		0.0277624	0.0668767		1.9052	1.53469		-186.009	53.8308
24_Benzene-Benzene_pi-pi_0.95	8.28091	-5.99018	-6.77073	-13.0176	-15.5676	2.55001	-4.93144	14.5948	-1.38246	-6.93333	6.60961	-1.05874	-2.92048		0.0201142	-0.0611673		0.0201102	0.0610532		2.63971	2.06173		-111.897	39.4634
24_Benzene-Benzene_pi-pi_1.00	5.24154	-4.66375	-5.21666	-10.0177	-11.6719	1.65419	-2.5888	8.73293	-0.902589	-4.00878	3.74018	-0.633988	-2.23438		0.0138967	-0.0559602		0.0138954	0.0558728		3.86964	2.86927		-76.26	32.5083
24_Benzene-Benzene_pi-pi_1.05	3.3855	-3.64971	-4.04635	-7.76043	-8.82759	1.06716	-1.23223	5.22058	-0.602852	-2.3543	2.12311	-0.371657	-1.72135		0.00836363	-0.0515381		0.00836334	0.0514697		6.29785	4.22892		-56.1265	28.5374
24_Benzene-Benzene_pi-pi_1.10	2.24684	-2.87235	-3.16176	-6.05265	-6.7385	0.685853	-0.460011	3.12019	-0.413341	-1.4114	1.21226	-0.214202	-1.33587		0.00307191	-0.0479623		0.0030719	0.0479073		13.1576	6.93036		-43.8567	26.0753
24_Benzene-Benzene_pi-pi_1.25	0.788092	-1.41374	-1.53734	-2.91052	-3.08063	0.170103	0.312733	0.626424	-0.151066	-0.338298	0.220976	-0.033744	-0.633926		-0.0137426	-0.041883		0.0137413	0.0418463		-9.30673	-18.0031		-28.1772	22.6652
24_Benzene-Benzene_pi-pi_1.50	0.265968	-0.463192	-0.505952	-0.927117	-0.940843	0.0137258	0.269307	0.0367726	-0.0401112	-0.0515747	0.011406	5.746e-05	-0.194717		-0.043365	-0.0441214		0.0433243	0.0440785		-3.44261	-4.04509		-29.6214	21.686
24_Benzene-Benzene_pi-pi_2.00	0.0718399	-0.0821195	-0.0932888	-0.160779	-0.16087	9.111e-05	0.0769859	0.00013646	-0.00528243	-0.00546873	5.474e-05	0.00013155	-0.0311132		-0.0834042	-0.063676		0.0831156	0.0635473		-2.08842	-2.24227		-53.3405	23.1013
25_Pyridine-Pyridine_pi-pi_0.90	12.4483	-7.9966	-9.03285	-17.5106	-21.4194	3.90883	-11.0811	26.1076	-2.57822	-13.6496	13.1163	-2.0449	-4.10803		0.0282518	-0.0608505		0.0282406	0.0607381		1.58022	1.28195		-143.262	47.2775
25_Pyridine-Pyridine_pi-pi_0.95	7.48039	-6.25413	-6.97749	-13.5036	-16.0891	2.5855	-6.80957	15.9268	-1.6368	-7.93193	7.58992	-1.29479	-3.1592		0.0205578	-0.054669		0.0205534	0.0545875		1.98304	1.59875		-83.9509	35.4551
25_Pyridine-Pyridine_pi-pi_1.00	4.44814	-4.91337	-5.41883	-10.4827	-12.1819	1.69918	-4.2095	9.71092	-1.05328	-4.64395	4.39191	-0.801237	-2.44592		0.0145662	-0.0489208		0.0145647	0.0488624		2.49025	1.99186		-53.3992	29.3628
25_Pyridine-Pyridine_pi-pi_1.05	2.60094	-3.87638	-4.23093	-8.18497	-9.2951	1.11013	-2.623	5.91294	-0.689	-2.74432	2.54395	-0.488629	-1.90619		0.00957899	-0.0437321		0.00957855	0.0436904		3.12046	2.47131		-35.0883	25.7157
25_Pyridine-Pyridine_pi-pi_1.10	1.48227	-3.07321	-3.3238	-6.42988	-7.15219	0.722307	-1.65605	3.59855	-0.460229	-1.64353	1.47875	-0.295441	-1.4965		0.00513849	-0.039173		0.00513843	0.039143		3.88266	3.0383		-23.1199	23.3418
25_Pyridine-Pyridine_pi-pi_1.25	0.163504	-1.57819	-1.67288	-3.22918	-3.42443	0.195248	-0.484353	0.806902	-0.159046	-0.393603	0.297592	-0.0630351	-0.756779		-0.00673245	-0.0291258		0.0067323	0.0291134		6.66701	5.01895		-4.2531	19.6855
25_Pyridine-Pyridine_pi-pi_1.50	-0.142128	-0.534769	-0.556789	-1.06621	-1.08379	0.0175749	-0.155862	0.0540994	-0.0403656	-0.0538443	0.0170267	-0.00354799	-0.256028		-0.0232189	-0.020173		0.0232127	0.0201689		6.84073	5.43354		9.54062	17.1864
25_Pyridine-Pyridine_pi-pi_2.00	-0.101715	-0.094987	-0.09614	-0.186622	-0.186751	0.00012873	-0.0951074	0.00024068	-0.00684821	-0.00676467	7.689e-05	-0.00016043	-0.0490382		-0.0235715	-0.00603264		0.023565	0.00603253		1.96222	1.83042		29.7516	14.3437
26_Uracil-Uracil_pi-pi_0.90	7.50964	-8.61951	-7.87387	-19.3609	-22.461	3.10005	-16.6536	27.614	-3.45072	-12.4805	10.4041	-1.37426	-2.02725		0.173862	0.0452084		0.171292	0.0451623		1.16257	0.963025		-68.2013	18.4112
26_Uracil-Uracil_pi-pi_0.95	2.80269	-6.96844	-6.25255	-15.432	-17.4959	2.06393	-12.0463	17.2449	-2.39598	-7.60651	6.09239	-0.881862	-1.52677		0.167231	0.054148		0.164941	0.0540688		1.28106	1.06853		-23.4631	12.7816
26_Uracil-Uracil_pi-pi_1.00	0.0487525	-5.6521	-4.97338	-12.3663	-13.7322	1.36587	-8.99394	10.7403	-1.69758	-4.70041	3.56205	-0.559224	-1.15184		0.163833	0.0638766		0.161678	0.0637467		1.37496	1.15664		-0.415673	9.82078
26_Uracil-Uracil_pi-pi_1.05	-1.49482	-4.59799	-3.96035	-9.95813	-10.8566	0.898474	-6.93287	6.66635	-1.22831	-2.95488	2.07997	-0.3534	-0.87066		0.163559	0.0745051		0.161414	0.0742992		1.43637	1.22018		13.684	7.97029
26_Uracil-Uracil_pi-pi_1.10	-2.29413	-3.75379	-3.1586	-8.06244	-8.6509	0.588462	-5.51432	4.12927	-0.909076	-1.90051	1.21581	-0.224382	-0.660458		0.166375	0.0861048		0.164119	0.0857874		1.46209	1.25517		23.2506	6.69362
26_Uracil-Uracil_pi-pi_1.25	-2.68577	-2.08803	-1.61469	-4.4186	-4.58044	0.161837	-3.23653	0.970433	-0.419683	-0.603148	0.245617	-0.0621514	-0.297281		0.19334	0.127836		0.189825	0.126804		1.36523	1.20852		40.1714	4.44647
26_Uracil-Uracil_pi-pi_1.50	-1.85876	-0.850574	-0.535641	-1.80291	-1.82092	0.018018	-1.78243	0.0851189	-0.16145	-0.168117	0.0180166	-0.0113497	-0.0824239		0.300597	0.227189		0.287872	0.221544		1.01149	0.927478		55.8623	2.47713
26_Uracil-Uracil_pi-pi_2.00	-0.800636	-0.186922	-0.0400975	-0.417656	-0.41787	0.00021393	-0.759584	0.00065397	-0.0417059	-0.0414385	0.00015621	-0.00042357	0.00375003		0.839735	0.646748		0.643073	0.543068		0.549848	0.521229		78.1943	-0.366247
27_Benzene-Pyridine_pi-pi_0.90	13.0955	-7.95884	-9.02278	-17.5925	-21.6048	4.01228	-10.4975	26.0495	-2.45648	-13.4064	12.8947	-1.94474	-3.99106		0.0359737	-0.0626524		0.0359505	0.0625298		1.67588	1.35808		-166.246	50.6661
27_Benzene-Pyridine_pi-pi_0.95	7.85709	-6.14505	-6.88007	-13.3834	-15.9871	2.60362	-6.09478	15.4915	-1.53963	-7.60461	7.26462	-1.19964	-3.02544		0.0275095	-0.056431		0.0274991	0.0563413		2.19588	1.75304		-95.8946	36.925
27_Benzene-Pyridine_pi-pi_1.00	4.73758	-4.77562	-5.2871	-10.2715	-11.9536	1.68207	-3.51232	9.23468	-0.984787	-4.37147	4.109	-0.722312	-2.31322		0.0207514	-0.0508292		0.020747	0.0507637		2.92443	2.28403		-62.0235	30.2843
27_Benzene-Pyridine_pi-pi_1.05	2.87224	-3.73339	-4.09315	-7.94321	-9.02554	1.08232	-1.99399	5.51078	-0.644553	-2.55131	2.33511	-0.428344	-1.78299		0.0149076	-0.0459667		0.0149059	0.0459182		3.98358	3.01046		-42.632	26.4645
27_Benzene-Pyridine_pi-pi_1.10	1.75567	-2.93706	-3.19399	-6.18918	-6.8839	0.694719	-1.10456	3.29355	-0.433321	-1.51792	1.33622	-0.251625	-1.38595		0.00948151	-0.0419064		0.00948109	0.0418696		5.60328	4.02448		-30.4733	24.0561
27_Benzene-Pyridine_pi-pi_1.25	0.432361	-1.48338	-1.58814	-3.05321	-3.23498	0.181768	-0.118017	0.706272	-0.155894	-0.3682	0.260929	-0.0486233	-0.682759		-0.00596118	-0.0341069		0.00596107	0.0340871		25.8708	11.1467		-13.0154	20.5532
27_Benzene-Pyridine_pi-pi_1.50	0.0494487	-0.489569	-0.520952	-0.97953	-0.994775	0.0152456	0.0465395	0.0434118	-0.0405021	-0.0526841	0.0140753	-0.00189333	-0.218244		-0.0306687	-0.0310563		0.0306543	0.0310413		-21.0473	-162.243		-4.193	18.506
27_Benzene-Pyridine_pi-pi_2.00	-0.0140624	-0.0859339	-0.0921268	-0.168519	-0.168623	0.0001036	-0.00835892	0.00017219	-0.0058748	-0.00604032	6.459e-05	0.00010093	-0.0378877		-0.0535854	-0.0347797		0.0535087	0.0347587		20.1604	11.8394		6.1138	16.4721
28_Benzene-Uracil_pi-pi_0.90	11.6899	-8.51897	-9.03801	-19.0065	-22.8439	3.83741	-13.0885	27.5982	-2.81969	-16.3139	15.1163	-1.62208	-3.18906		0.0825597	-0.0295632		0.0822797	0.0295503		1.45215	1.19476		-129.083	35.2143
28_Benzene-Uracil_pi-pi_0.95	6.7913	-6.77229	-7.10269	-14.9527	-17.5271	2.57439	-8.57642	17.2634	-1.89572	-9.98958	9.14987	-1.05601	-2.44929		0.0776749	-0.0238126		0.0774416	0.0238059		1.74347	1.42786		-71.2401	25.6929
28_Benzene-Uracil_pi-pi_1.00	3.79446	-5.39851	-5.59974	-11.819	-13.5326	1.71357	-5.67895	10.7653	-1.29187	-6.14816	5.52421	-0.667926	-1.88803		0.0746274	-0.0182965		0.0744204	0.0182935		2.0812	1.6955		-41.7349	20.7662
28_Benzene-Uracil_pi-pi_1.05	1.98669	-4.31484	-4.42938	-9.3822	-10.5142	1.13204	-3.80725	6.68801	-0.894064	-3.80861	3.32901	-0.41446	-1.46129		0.0729598	-0.0130989		0.0727664	0.0130978		2.4643	1.99565		-24.1724	17.7798
28_Benzene-Uracil_pi-pi_1.10	0.920993	-3.46066	-3.51866	-7.48407	-8.22764	0.743573	-2.59322	4.14435	-0.630136	-2.38261	2.00668	-0.254204	-1.13707		0.0723203	-0.00831027		0.0721319	0.00830998		2.88601	2.32182		-12.7998	15.8027
28_Benzene-Uracil_pi-pi_1.25	-0.194207	-1.8275	-1.81588	-3.91352	-4.11829	0.204765	-0.91816	0.971989	-0.248035	-0.632431	0.441022	-0.0566264	-0.555828		0.0741457	0.00318935		0.0739428	0.00318933		4.26235	3.3558		4.42041	12.6514
28_Benzene-Uracil_pi-pi_1.50	-0.224118	-0.691183	-0.67534	-1.47557	-1.49785	0.0222738	-0.233308	0.0841489	-0.074959	-0.105365	0.0353237	-0.00491718	-0.189473		0.0798013	0.0115937		0.0795484	0.0115929		6.32456	4.78667		12.5901	10.6439
28_Benzene-Uracil_pi-pi_2.00	-0.0173693	-0.140791	-0.143913	-0.301271	-0.301502	0.00023092	-0.00392521	0.00059925	-0.0140433	-0.0143569	0.00029231	2.125e-05	-0.029571		0.0581913	-0.0109658		0.058093	0.0109651		76.7529	16.7666		5.23733	8.91649
29_Pyridine-Uracil_pi-pi_0.90	12.1928	-9.00089	-9.38419	-20.2246	-24.2678	4.04323	-15.6376	31.212	-3.38166	-17.1739	15.7229	-1.93069	-3.43472		0.100055	-0.0208484		0.0995579	0.0208439		1.29333	1.06337		-126.652	35.678
29_Pyridine-Uracil_pi-pi_0.95	5.86601	-6.87624	-7.04649	-15.2872	-17.8211	2.53383	-10.0392	18.0203	-2.1151	-9.56258	8.62041	-1.17293	-2.52062		0.0980047	-0.0122282		0.0975374	0.0122273		1.52276	1.25776		-55.4583	23.8304
29_Pyridine-Uracil_pi-pi_1.00	2.3432	-5.28862	-5.32751	-11.6654	-13.244	1.57857	-6.71724	10.4162	-1.35576	-5.39922	4.73771	-0.694255	-1.86619		0.098842	-0.00366329		0.0983626	0.00366327		1.73664	1.445		-23.1105	18.4059
29_Pyridine-Uracil_pi-pi_1.05	0.42156	-4.09219	-4.05288	-8.97683	-9.95483	0.978	-4.70537	6.01975	-0.892822	-3.09765	2.61116	-0.406338	-1.39409		0.102119	0.00482623		0.10159	0.00482618		1.90779	1.60352		-4.62358	15.2901
29_Pyridine-Uracil_pi-pi_1.10	-0.585171	-3.1869	-3.10379	-6.96695	-7.57059	0.60364	-3.46	3.48068	-0.60585	-1.814	1.44576	-0.23761	-1.05199		0.107501	0.0132116		0.106886	0.0132104		2.01357	1.71353		7.3812	13.2696
29_Pyridine-Uracil_pi-pi_1.25	-1.33092	-1.56351	-1.44938	-3.41809	-3.55758	0.139488	-1.77735	0.672978	-0.226544	-0.427924	0.251303	-0.0499234	-0.481208		0.134489	0.0378806		0.133289	0.0378534		1.92313	1.70572		27.5837	9.97319
29_Pyridine-Uracil_pi-pi_1.50	-0.96306	-0.541029	-0.461665	-1.21218	-1.22386	0.0116739	-0.936629	0.0436972	-0.0701297	-0.078793	0.0143622	-0.00569885	-0.154975		0.208927	0.0791508		0.204512	0.078904		1.2942	1.20405		45.4117	7.30764
29_Pyridine-Uracil_pi-pi_2.00	-0.412557	-0.0961557	-0.0661882	-0.236836	-0.236914	7.748e-05	-0.398538	0.00018491	-0.0142038	-0.0139431	6.854e-05	-0.00032923	-0.0253547		0.458857	0.184593		0.417048	0.181526		0.594263	0.573813		68.7302	4.22398
30_Benzene-Ethene_0.90	7.72765	-4.31155	-4.95827	-9.48813	-11.8187	2.33055	-5.1724	14.4046	-1.50459	-7.60263	7.29169	-1.19365	-1.87716		0.0235503	-0.0697662		0.0235438	0.069597		1.83438	1.42102		-225.999	54.8985
30_Benzene-Ethene_0.95	5.03616	-3.33162	-3.82221	-7.24445	-8.78428	1.53983	-2.74276	8.72212	-0.943199	-4.4088	4.20758	-0.74198	-1.41145		0.0126675	-0.0685773		0.0126665	0.0684166		2.6413	1.96542		-142.703	39.9943
30_Benzene-Ethene_1.00	3.35982	-2.58557	-2.9612	-5.56018	-6.56806	1.00788	-1.29897	5.25801	-0.599226	-2.56502	2.41277	-0.446984	-1.06815		0.0024173	-0.0677205		0.0024173	0.0675657		4.28046	2.92919		-103.217	32.8146
30_Benzene-Ethene_1.05	2.30861	-2.01497	-2.30637	-4.28778	-4.94181	0.654023	-0.457561	3.15356	-0.387387	-1.50276	1.37807	-0.262704	-0.813415		-0.00776548	-0.0674328		0.00776525	0.06728		9.37096	5.07461		-81.6876	28.7818
30_Benzene-Ethene_1.10	1.64445	-1.57799	-1.80781	-3.32421	-3.7458	0.42159	0.0172406	1.88331	-0.256101	-0.891836	0.786955	-0.15122	-0.623613		-0.0181918	-0.0678776		0.0181888	0.0677218		-192.813	13.917		-69.5339	26.3688
30_Benzene-Ethene_1.25	0.750486	-0.781613	-0.906787	-1.60064	-1.70992	0.109287	0.446709	0.390162	-0.086386	-0.209634	0.148254	-0.0250057	-0.290723		-0.051981	-0.0741376		0.0519109	0.0739347		-3.58317	-4.44222		-61.0828	23.6622
30_Benzene-Ethene_1.50	0.341091	-0.270485	-0.329331	-0.532887	-0.543332	0.0104445	0.337122	0.02641	-0.0224408	-0.0310311	0.00886098	-0.00027075	-0.0879427		-0.111582	-0.0981068		0.110894	0.097638		-1.58069	-1.69342		-98.3913	25.368
30_Benzene-Ethene_2.00	0.110838	-0.0484846	-0.067629	-0.091688	-0.0917622	7.418e-05	0.114045	8.357e-05	-0.00328986	-0.00308884	4.141e-05	-0.00024243	-0.0122694		-0.210359	-0.164876		0.205854	0.16268		-0.803966	-0.827847		-631.734	69.9311
31_Uracil-Ethene_0.90	4.87525	-3.99536	-4.05067	-9.08377	-10.946	1.86225	-7.1926	13.4159	-1.34806	-8.96861	8.33066	-0.710117	-1.10724		0.128975	-0.0068742		0.127916	0.00687404		1.26293	1.06359		-113.96	25.8821
31_Uracil-Ethene_0.95	2.64803	-3.1804	-3.17905	-7.15776	-8.43212	1.27435	-5.02174	8.55965	-0.889888	-5.70472	5.27989	-0.465065	-0.841727		0.125532	0.000212283		0.124554	0.000212283		1.42536	1.21079		-58.1582	18.4867
31_Uracil-Ethene_1.00	1.27731	-2.53833	-2.49456	-5.66701	-6.53389	0.86688	-3.58152	5.45778	-0.598948	-3.64118	3.33896	-0.296729	-0.643955		0.125995	0.00869679		0.125007	0.00869646		1.58229	1.35559		-29.0328	14.6369
31_Uracil-Ethene_1.05	0.447727	-2.03067	-1.95731	-4.50616	-5.09245	0.586295	-2.61585	3.47534	-0.411766	-2.33302	2.10722	-0.185968	-0.495343		0.129935	0.0183953		0.128852	0.0183922		1.72264	1.48835		-11.0944	12.2743
31_Uracil-Ethene_1.10	-0.0398406	-1.62943	-1.53713	-3.6005	-3.99535	0.394845	-1.96223	2.21227	-0.289881	-1.50383	1.32928	-0.115334	-0.383078		0.137039	0.0291484		0.13577	0.029136		1.8349	1.59872		1.10993	10.6722
31_Uracil-Ethene_1.25	-0.522253	-0.858212	-0.75032	-1.89073	-2.00877	0.11804	-0.974312	0.568832	-0.116772	-0.422333	0.332663	-0.0271025	-0.181773		0.175439	0.0670748		0.1728	0.0669244		1.94058	1.73289		22.5833	7.86026
31_Uracil-Ethene_1.50	-0.43793	-0.317935	-0.236016	-0.714594	-0.729521	0.014927	-0.458558	0.0587982	-0.0381698	-0.0668962	0.0321272	-0.00340069	-0.0546593		0.289996	0.147881		0.278521	0.14629		1.55835	1.4386		41.8455	5.22286
31_Uracil-Ethene_2.00	-0.183689	-0.0584354	-0.0243695	-0.143312	-0.143509	0.00019704	-0.176327	0.0005791	-0.00794138	-0.00784189	0.0003006	-0.00040008	-0.00525559		0.730716	0.4114		0.589989	0.380461		0.812763	0.777736		67.595	1.93398
32_Uracil-Ethyne_0.90	3.84303	-3.72759	-3.61955	-8.70208	-10.5107	1.80858	-8.48667	13.7781	-1.44837	-8.84471	8.04957	-0.653239	-1.27107		0.184417	0.014705		0.181359	0.0147035		1.02538	0.875897		-80.4792	26.6183
32_Uracil-Ethyne_0.95	1.61154	-2.93683	-2.78542	-6.83091	-8.05549	1.22458	-6.12054	8.69852	-0.966441	-5.52778	4.99329	-0.431951	-0.951785		0.193745	0.0264599		0.190208	0.0264506		1.11606	0.963867		-31.8329	18.8007
32_Uracil-Ethyne_1.00	0.305722	-2.321	-2.14554	-5.39033	-6.21415	0.823819	-4.52434	5.48573	-0.65566	-3.47042	3.09088	-0.276124	-0.715462		0.206824	0.0392832		0.202537	0.0392529		1.19141	1.0406		-6.26957	14.6723
32_Uracil-Ethyne_1.05	-0.428104	-1.83929	-1.65373	-4.27334	-4.82409	0.550751	-3.42855	3.45315	-0.452707	-2.18978	1.90968	-0.172612	-0.53969		0.223394	0.0531231		0.218021	0.0530483		1.2464	1.10102		9.59699	12.0985
32_Uracil-Ethyne_1.10	-0.810813	-1.46237	-1.27637	-3.4051	-3.77159	0.366488	-2.66392	2.17185	-0.318749	-1.39209	1.17976	-0.106422	-0.40868		0.243308	0.0679144		0.236411	0.0677584		1.27823	1.14163		20.4842	10.3248
32_Uracil-Ethyne_1.25	-1.01181	-0.750492	-0.592295	-1.77564	-1.88114	0.105499	-1.42338	0.537111	-0.125543	-0.379361	0.277966	-0.0241474	-0.180737		0.322353	0.117812		0.306806	0.117003		1.24748	1.14637		39.9084	7.12871
32_Uracil-Ethyne_1.50	-0.650078	-0.267305	-0.170818	-0.6659	-0.67838	0.0124796	-0.663363	0.0517123	-0.0384281	-0.0598408	0.0242921	-0.0028794	-0.0483981		0.519893	0.220228		0.461278	0.215074		1.00383	0.948858		57.195	4.25815
32_Uracil-Ethyne_2.00	-0.219584	-0.0466457	-0.0145778	-0.134591	-0.134742	0.00015025	-0.212693	0.00045815	-0.00734843	-0.00728382	0.0002123	-0.00027691	-0.00302647		1.19836	0.523784		0.767791	0.463989		0.632795	0.611662		77.3635	1.06628
33_Pyridine-Ethene_0.90	6.92585	-4.27765	-4.82822	-9.35133	-11.5892	2.23785	-5.73563	14.2232	-1.56173	-8.03237	7.71028	-1.23965	-1.85442		0.0269562	-0.0604632		0.0269464	0.060353		1.63039	1.28147		-171.668	45.9648
33_Pyridine-Ethene_0.95	4.52561	-3.3691	-3.79885	-7.28106	-8.80365	1.52259	-3.42926	8.94311	-0.988242	-4.87839	4.68297	-0.792824	-1.42394		0.0157794	-0.0599544		0.0157774	0.0598469		2.12321	1.64823		-111.296	35.0182
33_Pyridine-Ethene_1.00	2.99049	-2.66297	-2.99878	-5.69401	-6.72154	1.02753	-1.98087	5.60274	-0.631376	-2.96581	2.82987	-0.495435	-1.09973		0.00569757	-0.0593121		0.00569747	0.059208		2.87449	2.17973		-79.3025	29.1629
33_Pyridine-Ethene_1.05	2.00781	-2.11186	-2.37569	-4.47052	-5.15864	0.688124	-1.07893	3.49513	-0.408392	-1.80827	1.70386	-0.30399	-0.854086		-0.00379489	-0.0587915		0.00379486	0.0586902		4.14347	3.00575		-60.2254	25.6188
33_Pyridine-Ethene_1.10	1.37913	-1.68154	-1.8908	-3.52579	-3.98389	0.458099	-0.525472	2.17324	-0.268638	-1.10992	1.02517	-0.183887	-0.667444		-0.0130307	-0.0585779		0.0130296	0.0584776		6.70976	4.43992		-48.2103	23.3319
33_Pyridine-Ethene_1.25	0.540671	-0.87056	-0.983119	-1.77818	-1.90939	0.131207	0.116237	0.511534	-0.0871013	-0.273214	0.223663	-0.0375504	-0.330004		-0.0407278	-0.0607219		0.040694	0.0606103		-15.2978	-61.03		-32.9073	20.0853
33_Pyridine-Ethene_1.50	0.214194	-0.319047	-0.370407	-0.628802	-0.643857	0.0150544	0.192706	0.0433436	-0.0218558	-0.0370793	0.0169853	-0.00176175	-0.112091		-0.0879706	-0.0744937		0.0876322	0.0742879		-3.26301	-3.68043		-36.4678	19.0842
33_Pyridine-Ethene_2.00	0.0720384	-0.0612055	-0.0781434	-0.115594	-0.11575	0.00015606	0.0755668	0.00024997	-0.00377855	-0.00373194	0.00011067	-0.00015729	-0.018289		-0.170472	-0.12155		0.168048	0.120662		-1.52969	-1.6102		-84.1575	21.3658
34_Pentane-Pentane_0.90	7.89078	-5.1796	-5.33459	-11.341	-12.726	1.38495	-3.96204	13.008	-1.15515	-2.22451	1.9619	-0.892537	-0.335696		0.0786414	-0.014741		0.0783994	0.0147394		2.86243	2.21626		-266.661	11.3445
34_Pentane-Pentane_0.95	4.99593	-4.14316	-4.25871	-8.94297	-9.8594	0.916426	-2.45816	8.18568	-0.731594	-1.30669	1.14391	-0.568808	-0.214221		0.0644027	-0.0137529		0.0642695	0.0137516		3.63808	2.80366		-138.003	5.91746
34_Pentane-Pentane_1.00	3.17902	-3.3403	-3.42692	-7.12261	-7.72901	0.606404	-1.52886	5.1714	-0.46352	-0.774757	0.671948	-0.360711	-0.13993		0.0525157	-0.0127999		0.0524434	0.0127989		4.65877	3.57492		-85.2712	3.75335
34_Pentane-Pentane_1.05	2.02981	-2.71197	-2.77707	-5.72254	-6.12347	0.40093	-0.949892	3.27353	-0.293829	-0.462652	0.396901	-0.228078	-0.0949069		0.0425393	-0.01186		0.0425009	0.0118592		6.02441	4.60115		-57.1112	2.67032
34_Pentane-Pentane_1.10	1.30154	-2.21758	-2.26656	-4.63742	-4.90253	0.265112	-0.588499	2.07678	-0.186743	-0.278373	0.235857	-0.144226	-0.0680254		0.0341833	-0.0109229		0.0341634	0.0109223		7.88009	5.98191		-40.0397	2.09269
34_Pentane-Pentane_1.25	0.353493	-1.26061	-1.28155	-2.58426	-2.66091	0.0766569	-0.131876	0.53425	-0.0488804	-0.0632857	0.0510295	-0.0366243	-0.0370236		0.0165597	-0.00823709		0.0165575	0.00823681		19.5962	14.2969		-15.8824	1.66347
34_Pentane-Pentane_1.50	0.0504229	-0.551203	-0.556571	-1.11087	-1.12055	0.00967314	-0.00054056	0.0564017	-0.00543822	-0.00651129	0.00435354	-0.00328047	-0.0239755		0.00279902	-0.00484575		0.00279901	0.0048457		2055.04	185.803		-4.66306	2.21723
34_Pentane-Pentane_2.00	0.0075115	-0.145361	-0.146246	-0.29066	-0.290804	0.00014483	0.00725172	0.0006532	-0.00039343	-0.00034609	3.563e-05	-8.297e-05	-0.0102337		-0.00324924	-0.00303491		0.00324922	0.00303489		-40.0815	-42.3808		-2.55207	3.47695
35_Neopentane-Pentane_0.90	5.80656	-3.65647	-3.73181	-8.04673	-9.07138	1.02465	-3.03364	9.79758	-0.957386	-1.85306	1.62193	-0.726255	-0.134431		0.0891206	-0.0101972		0.0887688	0.0101967		2.6525	2.01621		-338.348	7.83327
35_Neopentane-Pentane_0.95	3.51327	-2.85368	-2.91218	-6.18413	-6.83431	0.650185	-1.79778	5.88713	-0.57608	-1.02777	0.893021	-0.441331	-0.0580987		0.0725422	-0.0101459		0.0723521	0.0101454		3.43987	2.6051		-152.044	2.51435
35_Neopentane-Pentane_1.00	2.15654	-2.26001	-2.30529	-4.8345	-5.25023	0.415734	-1.0783	3.58556	-0.350727	-0.583051	0.50126	-0.268936	-0.0194875		0.0589658	-0.0099183		0.0588636	0.00991781		4.48344	3.38307		-88.8106	0.802534
35_Neopentane-Pentane_1.05	1.33768	-1.81161	-1.84648	-3.83253	-4.09975	0.26722	-0.65064	2.20378	-0.215459	-0.336478	0.285434	-0.164415	-0.00129013		0.0476871	-0.0095323		0.047633	0.00953186		5.8904	4.42505		-57.6164	0.0555683
35_Neopentane-Pentane_1.10	0.837918	-1.46811	-1.49486	-3.07646	-3.24909	0.17263	-0.393559	1.36498	-0.133505	-0.197186	0.164613	-0.100932	0.00605783		0.0383041	-0.0090281		0.038276	0.00902774		7.81702	5.83697		-39.5432	-0.285882
35_Neopentane-Pentane_1.25	0.217756	-0.824356	-0.836244	-1.6915	-1.73906	0.0475633	-0.0834864	0.33431	-0.0330673	-0.0428423	0.033378	-0.0236029	0.00522264		0.0186078	-0.00715886		0.0186046	0.00715867		20.2608	14.5126		-15.147	-0.363284
35_Neopentane-Pentane_1.50	0.0316882	-0.361608	-0.36487	-0.72894	-0.734704	0.00576361	0.00153505	0.0339579	-0.00380473	-0.00443664	0.00262305	-0.00199114	-0.00363462		0.00338921	-0.00449016		0.0033892	0.00449011		-474.864	321.164		-4.5371	0.520403
35_Neopentane-Pentane_2.00	0.00572984	-0.0982196	-0.0989386	-0.196656	-0.196741	8.511e-05	0.00561905	0.00039275	-0.00028197	-0.00026661	2.229e-05	-3.765e-05	-0.00341633		-0.00254897	-0.00364682		0.00254896	0.00364679		-34.998	-36.847		-2.94072	1.75336
36_Neopentane-Neopentane_0.90	3.53511	-2.30083	-2.39518	-5.15995	-5.7085	0.548548	-1.52064	5.65755	-0.601808	-0.843883	0.685024	-0.442949	0.0361213		0.098794	-0.0200915		0.0983153	0.0200875		3.39328	2.43114		-314.294	-3.21142
36_Neopentane-Neopentane_0.95	2.27261	-1.84247	-1.9166	-4.07315	-4.43577	0.362625	-0.925343	3.57707	-0.379117	-0.498267	0.397932	-0.278781	0.0540414		0.0835515	-0.0197203		0.0832614	0.0197165		4.40177	3.12248		-158.655	-3.77274
36_Neopentane-Neopentane_1.00	1.47308	-1.49026	-1.54825	-3.25206	-3.49195	0.239891	-0.559195	2.27177	-0.239504	-0.297497	0.232935	-0.174942	0.0584639		0.0702805	-0.019085		0.0701076	0.0190815		5.81561	4.0717		-97.7514	-3.87957
36_Neopentane-Neopentane_1.05	0.962055	-1.21583	-1.26107	-2.62223	-2.78089	0.15866	-0.332626	1.44632	-0.151641	-0.179286	0.137116	-0.109471	0.0563301		0.0586759	-0.0182648		0.0585752	0.0182617		7.88344	5.41486		-65.9613	-3.86216
36_Neopentane-Neopentane_1.10	0.634102	-1.00015	-1.03545	-2.13445	-2.23946	0.105001	-0.192652	0.9231	-0.0963464	-0.109149	0.0812042	-0.0684012	0.0513758		0.0485626	-0.0173413		0.0485055	0.0173387		11.0793	7.3857		-46.9663	-3.80527
36_Neopentane-Neopentane_1.25	0.194833	-0.580651	-0.597721	-1.20883	-1.23936	0.030524	-0.0215948	0.241859	-0.0254307	-0.0262514	0.0173984	-0.0165778	0.0325822		0.0258509	-0.0144861		0.0258422	0.0144846		55.978	25.7059		-20.4881	-3.42625
36_Neopentane-Neopentane_1.50	0.0406803	-0.262406	-0.268246	-0.534346	-0.538235	0.00388904	0.0180901	0.0262078	-0.0036176	-0.00326371	0.00143785	-0.00179174	0.0088028		0.00696202	-0.0110053		0.00696185	0.0110047		-29.538	-36.9214		-8.45447	-1.82946
36_Neopentane-Neopentane_2.00	0.00873625	-0.0724511	-0.0739067	-0.146309	-0.146367	5.787e-05	0.00875024	0.00031772	-0.00033172	-0.00022961	1.124e-05	-0.00011335	-0.000522065		-0.00033015	-0.00994549		0.00033015	0.009945		-16.7206	-17.3795		-6.32403	0.377914
37_Cyclopentane-Neopentane_0.90	5.98353	-3.65195	-3.72293	-8.06056	-9.10622	1.04566	-3.13902	10.1334	-1.0109	-1.90342	1.65782	-0.765287	-0.181805		0.0929751	-0.00962456		0.0925758	0.00962412		2.56786	1.94234		-380.352	11.5567
37_Cyclopentane-Neopentane_0.95	3.71169	-2.8523	-2.91093	-6.20882	-6.88336	0.674542	-1.89702	6.23473	-0.626022	-1.0808	0.933145	-0.478369	-0.0935213		0.0773162	-0.0101731		0.0770861	0.0101726		3.27294	2.46085		-173.034	4.35984
37_Cyclopentane-Neopentane_1.00	2.34284	-2.26364	-2.31125	-4.86903	-5.30904	0.440011	-1.16364	3.89922	-0.392744	-0.629177	0.536775	-0.300343	-0.0462023		0.0642944	-0.0104068		0.064162	0.0104062		4.18433	3.12843		-102.835	2.02797
37_Cyclopentane-Neopentane_1.05	1.49716	-1.8194	-1.85754	-3.87287	-4.16195	0.289085	-0.719084	2.46482	-0.248576	-0.372889	0.313484	-0.189171	-0.0215363		0.0532848	-0.0103728		0.0532094	0.0103722		5.38583	4.0023		-68.012	0.978339
37_Cyclopentane-Neopentane_1.10	0.967241	-1.47877	-1.50905	-3.11907	-3.31014	0.19107	-0.445629	1.57143	-0.158557	-0.224389	0.185393	-0.119561	-0.00927094		0.0439271	-0.0101345		0.0438848	0.010134		6.99925	5.16243		-47.6509	0.45673
37_Cyclopentane-Neopentane_1.25	0.276379	-0.837653	-0.852417	-1.72964	-1.78612	0.0564808	-0.101276	0.420256	-0.0426008	-0.0525458	0.040407	-0.0304621	-0.000737988		0.0234155	-0.00873573		0.0234091	0.0087354		17.0784	12.0217		-19.54	0.0521757
37_Cyclopentane-Neopentane_1.50	0.0452604	-0.371163	-0.375789	-0.751443	-0.759167	0.00772407	0.00150299	0.0491102	-0.00535274	-0.00595226	0.0035591	-0.00295957	-0.00526684		0.00601227	-0.00619317		0.00601217	0.00619305		-499.965	195.193		-6.40213	0.745
37_Cyclopentane-Neopentane_2.00	0.00723212	-0.100998	-0.101998	-0.202721	-0.202865	0.00014364	0.00693489	0.00071169	-0.00041447	-0.00033209	3.47e-05	-0.00011708	-0.0045962		-0.00135313	-0.00492621		0.00135313	0.00492615		-29.2321	-31.0902		-3.60956	2.29397
38_Cyclopentane-Cyclopentane_0.90	6.24618	-4.1234	-4.18219	-8.90546	-9.99467	1.08921	-3.29372	10.5578	-1.01786	-1.71455	1.47063	-0.773938	-0.250218		0.0722253	-0.00707837		0.0720377	0.00707819		2.70377	2.06547		-270.441	10.8337
38_Cyclopentane-Cyclopentane_0.95	4.05857	-3.34022	-3.38972	-7.13792	-7.87777	0.739852	-2.11263	6.83489	-0.663684	-1.0378	0.881436	-0.50732	-0.157757		0.060621	-0.00735519		0.0605099	0.00735499		3.37868	2.571		-143.457	5.57619
38_Cyclopentane-Cyclopentane_1.00	2.51426	-2.66037	-2.70083	-5.62724	-6.10657	0.479321	-1.28804	4.21265	-0.410349	-0.596848	0.500269	-0.313769	-0.0958826		0.0496241	-0.00754682		0.0495631	0.0075466		4.36883	3.31328		-85.437	3.25818
38_Cyclopentane-Cyclopentane_1.05	1.54519	-2.12541	-2.15786	-4.45522	-4.7622	0.306983	-0.776128	2.57184	-0.250519	-0.341589	0.281882	-0.190813	-0.0605975		0.0401435	-0.00757599		0.0401112	0.00757577		5.74031	4.33958		-55.2114	2.16522
38_Cyclopentane-Cyclopentane_1.10	0.959443	-1.71709	-1.74284	-3.57167	-3.76934	0.197671	-0.469762	1.58324	-0.154033	-0.198544	0.161	-0.116489	-0.0419799		0.0322963	-0.00744235		0.0322795	0.00744214		7.60316	5.72572		-37.7367	1.65115
38_Cyclopentane-Cyclopentane_1.25	0.243004	-0.956823	-0.969108	-1.95669	-2.01071	0.0540222	-0.101557	0.381854	-0.0372936	-0.0420877	0.0318639	-0.0270699	-0.0237775		0.0159717	-0.00637873		0.0159697	0.0063786		19.267	14.0921		-14.2382	1.39318
38_Cyclopentane-Cyclopentane_1.50	0.0333119	-0.415819	-0.419345	-0.838042	-0.844553	0.00651075	-0.00046	0.0380331	-0.00426124	-0.00419195	0.00245626	-0.00252555	-0.0178419		0.00344637	-0.00422193		0.00344634	0.00422189		1821.83	177.505		-4.06394	2.17666
38_Cyclopentane-Cyclopentane_2.00	0.00568013	-0.111153	-0.111806	-0.222697	-0.222793	9.69e-05	0.00552832	0.00042281	-0.000271	-0.0002612	1.915e-05	-2.895e-05	-0.00848629		-0.00117699	-0.00292879		0.00117699	0.00292878		-40.2829	-42.3593		-2.51595	3.7589
39_Benzene-Cyclopentane_0.90	8.58147	-5.76021	-6.1282	-12.6251	-14.8391	2.21404	-6.22792	16.44	-1.63063	-5.26989	4.91714	-1.27788	-1.74529		0.061963	-0.0309537		0.0618444	0.0309389		2.02717	1.60654		-169.855	34.545
39_Benzene-Cyclopentane_0.95	5.27478	-4.58744	-4.84011	-9.94003	-11.4313	1.49129	-3.97576	10.3217	-1.0712	-3.16286	2.91594	-0.82427	-1.34684		0.0543603	-0.0268012		0.0542802	0.0267916		2.50016	1.96951		-95.9118	24.4898
39_Benzene-Cyclopentane_1.00	3.15758	-3.64468	-3.8134	-7.81664	-8.80302	0.986381	-2.52303	6.38184	-0.701231	-1.88953	1.70577	-0.517469	-1.04212		0.048077	-0.0226224		0.0480215	0.0226167		3.09812	2.42432		-59.1017	19.5058
39_Benzene-Cyclopentane_1.05	1.83284	-2.89348	-3.00272	-6.14865	-6.79109	0.64244	-1.60076	3.894	-0.460404	-1.13025	0.988199	-0.318352	-0.811035		0.0428154	-0.0185272		0.0427762	0.018524		3.84108	2.98309		-37.6014	16.6387
39_Benzene-Cyclopentane_1.10	1.04202	-2.31556	-2.38475	-4.88124	-5.30021	0.418973	-1.03651	2.38774	-0.309205	-0.691977	0.57893	-0.196159	-0.640961		0.0384929	-0.0147203		0.0384644	0.0147187		4.70928	3.62723		-24.2372	14.9087
39_Benzene-Cyclopentane_1.25	0.126446	-1.23857	-1.25111	-2.56273	-2.67963	0.116902	-0.326917	0.562499	-0.109136	-0.184719	0.123092	-0.0475097	-0.339875		0.0293416	-0.00503679		0.0293289	0.00503673		7.8391	5.87711		-4.6778	12.5735
39_Benzene-Cyclopentane_1.50	-0.0665384	-0.487911	-0.481971	-0.991069	-1.00467	0.013598	-0.0886761	0.0516057	-0.029468	-0.0342399	0.0100212	-0.00524926	-0.135598		0.0218453	0.00612446		0.0218401	0.00612434		11.1763	8.38865		5.67725	11.5696
39_Benzene-Cyclopentane_2.00	-0.0289073	-0.0997505	-0.0962567	-0.199882	-0.200013	0.00013106	-0.0253952	0.00034942	-0.0038615	-0.00404192	6.41e-05	0.00011633	-0.0272586		0.0197707	0.0178249		0.0197668	0.017822		7.87088	6.83202		11.4633	10.8095
40_Benzene-Neopentane_0.90	6.40212	-4.35749	-4.63253	-9.67458	-11.2815	1.6069	-4.48146	12.1398	-1.25621	-3.47614	3.1271	-0.907178	-1.19935		0.0761469	-0.0305939		0.0759271	0.0305796		2.1588	1.68615		-169.044	31.6682
40_Benzene-Neopentane_0.95	3.83182	-3.45044	-3.62832	-7.54413	-8.60597	1.06184	-2.85902	7.51711	-0.826275	-2.02714	1.7809	-0.580039	-0.917465		0.0657423	-0.0251287		0.0656007	0.0251208		2.63872	2.04709		-92.0136	22.0311
40_Benzene-Neopentane_1.00	2.25396	-2.74951	-2.86055	-5.93187	-6.63041	0.698546	-1.85275	4.65583	-0.549121	-1.20175	1.01808	-0.36545	-0.711873		0.0573628	-0.019793		0.0572687	0.0197891		3.20166	2.46969		-55.4075	17.4994
40_Benzene-Neopentane_1.05	1.28688	-2.20372	-2.26919	-4.69905	-5.15662	0.457575	-1.22354	2.88022	-0.369807	-0.725428	0.583836	-0.228215	-0.560202		0.0505575	-0.014637		0.050493	0.0146354		3.84054	2.94917		-34.3513	14.9537
40_Benzene-Neopentane_1.10	0.699821	-1.77734	-1.81228	-3.75124	-4.05017	0.298935	-0.827879	1.78117	-0.253466	-0.447661	0.336218	-0.142024	-0.446822		0.045024	-0.00973362		0.0449784	0.00973316		4.53114	3.46905		-20.9739	13.3914
40_Benzene-Neopentane_1.25	0.0193232	-0.965953	-0.959779	-1.99126	-2.07336	0.0820926	-0.307657	0.419406	-0.0924262	-0.123458	0.0653393	-0.0343075	-0.240437		0.0340296	0.00320605		0.03401	0.00320604		6.47236	4.97713		-0.900074	11.1995
40_Benzene-Neopentane_1.50	-0.0990547	-0.391289	-0.376884	-0.789057	-0.798147	0.00908998	-0.110925	0.0372213	-0.025351	-0.0266578	0.00455916	-0.00325235	-0.0992957		0.0271867	0.0187523		0.0271766	0.018749		7.11343	5.79014		10.2486	10.2735
40_Benzene-Neopentane_2.00	-0.0407594	-0.0912292	-0.0850185	-0.18135	-0.181448	9.784e-05	-0.0368741	0.00027074	-0.00415603	-0.0041988	3.224e-05	1.053e-05	-0.0243251		0.0289504	0.0352385		0.0289383	0.0352166		4.91809	4.41993		16.8893	10.0795
41_Uracil-Pentane_0.90	8.3094	-6.19739	-6.25541	-13.5056	-15.3574	1.85182	-5.56089	15.5533	-1.68303	-5.35525	4.52852	-0.856299	-0.884663		0.084545	-0.00465919		0.0842444	0.00465914		2.42868	1.86441		-165.26	17.5945
41_Uracil-Pentane_0.95	5.11979	-5.01095	-5.04269	-10.7695	-12.0062	1.23672	-3.54349	9.81438	-1.1511	-3.30831	2.70057	-0.543358	-0.646132		0.0712069	-0.00315707		0.0710271	0.00315705		3.03924	2.29403		-91.7528	11.5795
41_Uracil-Pentane_1.00	3.1121	-4.0649	-4.07895	-8.62921	-9.44968	0.820468	-2.26095	6.16999	-0.796938	-2.06517	1.60762	-0.339394	-0.476635		0.0595987	-0.00172523		0.0594931	0.00172523		3.81662	2.82195		-56.4975	8.6529
41_Uracil-Pentane_1.05	1.85262	-3.3053	-3.30753	-6.94048	-7.48033	0.539848	-1.44238	3.85478	-0.559783	-1.30379	0.953145	-0.209138	-0.35523		0.0495481	-0.000337223		0.0494874	0.000337223		4.81184	3.4665		-36.2162	6.94426
41_Uracil-Pentane_1.10	0.958659	-2.58995	-2.58324	-5.37694	-5.70083	0.323888	-0.843671	2.17832	-0.375988	-0.767887	0.507656	-0.115757	-0.253979		0.0393861	0.00129707		0.0393556	0.00129707		6.37327	4.40856		-21.4537	5.68374
41_Uracil-Pentane_1.25	0.071971	-1.31298	-1.29851	-2.66264	-2.73253	0.069896	-0.184646	0.399445	-0.142828	-0.202404	0.08041	-0.0208342	-0.109606		0.019586	0.0055409		0.0195823	0.00554081		14.4202	8.13083		-2.71678	4.13746
41_Uracil-Pentane_1.50	-0.0450536	-0.499517	-0.49046	-0.996558	-1.00212	0.00556441	-0.0217453	0.0252413	-0.0485496	-0.0513564	0.00435146	-0.00154463	-0.0421489		0.00664727	0.0091487		0.00664712	0.00914831		45.8286	14.1768		4.18255	3.9129
41_Uracil-Pentane_2.00	-0.011287	-0.112189	-0.110466	-0.222802	-0.22284	3.81e-05	0.00033539	0.00011565	-0.0117381	-0.0117672	2.104e-05	8.05e-06	-0.00894371		0.000660439	0.00773843		0.000660439	0.0077382		-664.307	19.5394		4.64704	3.68227
42_Uracil-Cyclopentane_0.90	8.0097	-5.64797	-5.79085	-12.2853	-13.998	1.71274	-4.8994	14.2989	-1.38976	-5.01469	4.3759	-0.750977	-0.874482		0.0740013	-0.0124908		0.0737995	0.0124898		2.50751	1.95341		-186.116	20.3198
42_Uracil-Cyclopentane_0.95	4.81743	-4.48781	-4.58515	-9.62143	-10.7294	1.10799	-2.96221	8.67637	-0.896729	-2.94654	2.50561	-0.455793	-0.62464		0.0604512	-0.0107286		0.0603411	0.010728		3.24806	2.49329		-98.7144	12.7996
42_Uracil-Cyclopentane_1.00	2.88594	-3.59045	-3.65518	-7.60084	-8.31603	0.71519	-1.79893	5.2748	-0.589938	-1.75882	1.44285	-0.273962	-0.454182		0.0490243	-0.00893366		0.0489655	0.0089333		4.22521	3.18178		-59.9505	9.43486
42_Uracil-Cyclopentane_1.05	1.71494	-2.89016	-2.93146	-6.05105	-6.51145	0.460403	-1.09639	3.20796	-0.396631	-1.06723	0.834382	-0.16378	-0.336823		0.0394098	-0.00709425		0.0393792	0.00709407		5.51908	4.0529		-38.5943	7.58013
42_Uracil-Cyclopentane_1.10	1.0078	-2.34147	-2.36609	-4.85545	-5.15145	0.295995	-0.671981	1.95337	-0.27359	-0.660705	0.485012	-0.0978973	-0.255306		0.0314154	-0.00522989		0.0313999	0.00522981		7.22558	5.13494		-25.4812	6.45517
42_Uracil-Cyclopentane_1.25	0.172746	-1.29031	-1.28969	-2.6192	-2.69718	0.0779838	-0.163721	0.442372	-0.105907	-0.182024	0.0975676	-0.0214499	-0.126103		0.0151925	0.00024031		0.0151907	0.00024031		15.9979	9.71411		-6.81886	4.9777
42_Uracil-Cyclopentane_1.50	-0.0255762	-0.53409	-0.525838	-1.06498	-1.07322	0.0082478	-0.0286668	0.0374816	-0.0343914	-0.0398763	0.00717846	-0.00169358	-0.0517577		0.0047624	0.00778543		0.00476234	0.0077852		37.1501	16.8888		2.24893	4.55108
42_Uracil-Cyclopentane_2.00	-0.0206752	-0.127742	-0.123374	-0.252622	-0.252708	8.621e-05	-0.01248	0.00027163	-0.00846679	-0.00846999	4.899e-05	-4.58e-05	-0.0112854		0.00599791	0.0173944		0.0059978	0.0173917		20.2421	12.0602		7.30375	3.98669
43_Uracil-Neopentane_0.90	5.73717	-4.34238	-4.38087	-9.69005	-11.0593	1.36927	-4.8826	11.7408	-1.12099	-4.26101	3.73208	-0.592062	-0.497073		0.11083	-0.00441235		0.110156	0.0044123		1.98461	1.61404		-164.712	14.2708
43_Uracil-Neopentane_0.95	3.21544	-3.45172	-3.45177	-7.57102	-8.45473	0.883714	-3.16728	7.10008	-0.717355	-2.49975	2.14301	-0.36062	-0.341772		0.0966943	-7.24271e-06		0.0962454	7.24271e-06		2.39038	1.94896		-79.7911	8.48106
43_Uracil-Neopentane_1.00	1.73085	-2.76336	-2.74005	-5.96962	-6.53883	0.569214	-2.10707	4.305	-0.467078	-1.48751	1.23749	-0.217057	-0.237626		0.0847127	0.00423556		0.0844103	0.00423552		2.83313	2.31906		-43.1613	5.92555
43_Uracil-Neopentane_1.05	0.861878	-2.22612	-2.1894	-4.74518	-5.1109	0.36572	-1.44071	2.61266	-0.31007	-0.897984	0.717622	-0.129708	-0.167374		0.0746584	0.00831612		0.0744512	0.00831583		3.29363	2.71032		-23.1624	4.49807
43_Uracil-Neopentane_1.10	0.361424	-1.80487	-1.76127	-3.8026	-4.03725	0.234643	-1.01574	1.58779	-0.210621	-0.551497	0.418187	-0.0773104	-0.119898		0.0663078	0.0122261		0.0661625	0.0122252		3.74367	3.10072		-10.8712	3.60636
43_Uracil-Neopentane_1.25	-0.149415	-0.996407	-0.952179	-2.04594	-2.10737	0.0614283	-0.429991	0.357696	-0.0771198	-0.145247	0.0846591	-0.0165322	-0.0503618		0.0499605	0.0226975		0.0498982	0.0226916		4.7581	4.0345		6.95483	2.34419
43_Uracil-Neopentane_1.50	-0.160847	-0.413183	-0.384828	-0.831126	-0.83753	0.00640452	-0.167194	0.0299975	-0.0236504	-0.0283479	0.00622007	-0.00152257	-0.0190435		0.0414968	0.0355321		0.0414612	0.0355097		4.97102	4.35499		16.4482	1.94738
43_Uracil-Neopentane_2.00	-0.0546316	-0.0998068	-0.090564	-0.199212	-0.199277	6.45e-05	-0.0490733	0.00020992	-0.0057683	-0.00581315	4.1e-05	3.85e-06	-0.00313732		0.046444	0.0485516		0.046394	0.0484944		4.05949	3.63251		22.0165	1.26434
44_Ethene-Pentane_0.90	3.82892	-2.6414	-2.72938	-5.72047	-6.45982	0.739356	-2.13451	6.6581	-0.694673	-1.46769	1.28786	-0.514845	-0.267183		0.0651091	-0.0163812		0.0649715	0.016379		2.67999	2.02195		-211.654	14.7693
44_Ethene-Pentane_0.95	2.37622	-2.08777	-2.15245	-4.46695	-4.95052	0.483568	-1.32351	4.13998	-0.440247	-0.872755	0.75441	-0.321902	-0.183481		0.053471	-0.0152539		0.0533947	0.0152522		3.37507	2.53263		-116.056	8.96132
44_Ethene-Pentane_1.00	1.47956	-1.66469	-1.71186	-3.52484	-3.8416	0.316765	-0.827801	2.58823	-0.280878	-0.527089	0.446731	-0.20052	-0.129864		0.0439165	-0.0139699		0.0438742	0.0139685		4.25807	3.17931		-72.9979	6.40715
44_Ethene-Pentane_1.05	0.9219	-1.33768	-1.37174	-2.8071	-3.01477	0.207667	-0.521274	1.62363	-0.180454	-0.322695	0.266833	-0.124593	-0.0951874		0.0360528	-0.012571		0.0360294	0.01257		5.38508	4.00027		-48.9667	5.05588
44_Ethene-Pentane_1.10	0.574549	-1.08324	-1.10754	-2.2557	-2.39209	0.136382	-0.330594	1.02221	-0.117064	-0.200397	0.160775	-0.0774428	-0.072434		0.0296353	-0.0110919		0.0296223	0.0110913		6.82318	5.0389		-34.0239	4.28942
44_Ethene-Pentane_1.25	0.136738	-0.599617	-0.607511	-1.22747	-1.26643	0.0389671	-0.0877778	0.259134	-0.0346176	-0.0522841	0.036682	-0.0190155	-0.0381834		0.016849	-0.00653949		0.0168466	0.00653935		13.9838	10.0287		-12.3346	3.44437
44_Ethene-Pentane_1.50	0.00913657	-0.252059	-0.252244	-0.508717	-0.513636	0.00491988	-0.0119211	0.0274092	-0.00635157	-0.00774571	0.00343524	-0.0020411	-0.017103		0.0087519	-0.000366843		0.00875157	0.000366843		42.6737	27.8403		-1.78355	3.33867
44_Ethene-Pentane_2.00	-0.0014274	-0.0624386	-0.0618864	-0.12538	-0.125459	7.859e-05	-0.00116458	0.00034485	-0.00060768	-0.00066447	4.049e-05	1.63e-05	-0.00494941		0.00848518	0.00444158		0.00848487	0.00444154		107.661	70.7458		1.0921	3.78679
45_Ethyne-Pentane_0.90	4.16703	-2.66157	-2.87941	-5.82897	-6.79668	0.967705	-3.03406	8.03525	-0.834156	-2.45087	2.23446	-0.617746	-0.711184		0.0519747	-0.0393143		0.0519046	0.039284		1.92118	1.50689		-199.845	34.1074
45_Ethyne-Pentane_0.95	2.48134	-2.07513	-2.22208	-4.48508	-5.11595	0.630865	-1.91097	4.92802	-0.535708	-1.44298	1.29511	-0.387833	-0.537923		0.04372	-0.0341966		0.0436782	0.0341766		2.34702	1.83313		-105.419	22.8535
45_Ethyne-Pentane_1.00	1.4576	-1.62855	-1.72552	-3.48122	-3.89086	0.409635	-1.22401	3.02862	-0.347011	-0.860009	0.753181	-0.240184	-0.412413		0.0379097	-0.0289111		0.0378825	0.0288991		2.84412	2.2159		-63.1301	17.862
45_Ethyne-Pentane_1.05	0.835792	-1.28594	-1.34803	-2.72347	-2.98844	0.264972	-0.799807	1.86257	-0.226973	-0.518956	0.439281	-0.147299	-0.320238		0.0339792	-0.0235728		0.0339596	0.0235662		3.40516	2.65244		-39.4536	15.1169
45_Ethyne-Pentane_1.10	0.460536	-1.02211	-1.06021	-2.14796	-2.31897	0.171007	-0.535997	1.14691	-0.150376	-0.317837	0.257291	-0.0898309	-0.251806		0.031523	-0.0182969		0.0315074	0.0182938		4.00742	3.12944		-24.5804	13.4397
45_Ethyne-Pentane_1.25	0.0254307	-0.533175	-0.536906	-1.10242	-1.14787	0.0454562	-0.195144	0.269052	-0.0484777	-0.081069	0.0529403	-0.0203489	-0.130079		0.0302197	-0.00348665		0.0302059	0.00348663		5.64925	4.52512		-2.16481	11.0731
45_Ethyne-Pentane_1.50	-0.0567038	-0.203297	-0.196882	-0.415405	-0.420249	0.00484376	-0.0697912	0.0242816	-0.0111941	-0.0127834	0.0039351	-0.00234583	-0.0493691		0.0380476	0.0160303		0.0380201	0.0160283		5.95211	5.12938		11.2007	9.75189
45_Ethyne-Pentane_2.00	-0.0255088	-0.0429651	-0.0396149	-0.0876484	-0.0876964	4.803e-05	-0.0244165	0.00019157	-0.00128388	-0.00130866	2.275e-05	2.03e-06	-0.0101981		0.0613755	0.0405691		0.0612602	0.0405358		3.58972	3.41039		21.5652	8.62153
46_Peptide-Pentane_0.90	5.80715	-4.70106	-4.6899	-10.3892	-11.7182	1.32901	-4.30542	11.6999	-1.58737	-3.19434	2.42639	-0.819419	-0.353591		0.106296	0.00118838		0.1057	0.00118838		2.41304	1.76303		-147.487	8.98031
46_Peptide-Pentane_0.95	3.71478	-3.89172	-3.87536	-8.49024	-9.42139	0.931146	-2.94906	7.80937	-1.14553	-2.13231	1.5314	-0.544614	-0.24772		0.0931062	0.00210633		0.0927053	0.00210632		2.87897	2.07353		-86.3898	5.7609
46_Peptide-Pentane_1.00	2.33161	-3.23126	-3.21106	-6.96775	-7.61733	0.649574	-2.03416	5.20361	-0.837844	-1.44443	0.966311	-0.359722	-0.174907		0.0815595	0.00313552		0.0812896	0.0031355		3.42537	2.42609		-54.4055	4.08126
46_Peptide-Pentane_1.05	1.42192	-2.69017	-2.66737	-5.74041	-6.19143	0.45102	-1.41466	3.45828	-0.6217	-0.994454	0.609051	-0.236298	-0.124992		0.0714646	0.00425568		0.0712828	0.00425565		4.05781	2.81896		-35.0174	3.07817
46_Peptide-Pentane_1.10	0.830613	-2.24715	-2.2229	-4.75029	-5.06238	0.31209	-0.995214	2.29477	-0.468949	-0.698136	0.383925	-0.154738	-0.090966		0.0626919	0.005425		0.0625691	0.00542492		4.77313	3.24437		-22.266	2.4385
46_Peptide-Pentane_1.25	0.0601283	-1.33691	-1.31305	-2.76391	-2.8654	0.101494	-0.380799	0.663709	-0.222782	-0.275813	0.096255	-0.0432244	-0.0410729		0.0430004	0.00900391		0.0429607	0.00900354		7.25819	4.57919		-2.28546	1.56117
46_Peptide-Pentane_1.50	-0.121211	-0.545395	-0.529667	-1.10127	-1.1126	0.0113353	-0.10539	0.0607776	-0.0765986	-0.079555	0.00713619	-0.00417975	-0.0164156		0.0243743	0.0146299		0.024367	0.0146283		10.4494	6.05129		9.99523	1.35366
46_Peptide-Pentane_2.00	-0.04907	-0.126902	-0.121884	-0.25301	-0.253136	0.00012588	-0.0324949	0.00049068	-0.0170657	-0.0171124	4.686e-05	-2.2e-07	-0.00367092		0.0169794	0.0201699		0.0169769	0.0201658		7.78615	5.10506		16.2738	1.21744
47_Benzene-Benzene_TS_0.90	5.8111	-4.1923	-4.3423	-9.23171	-10.7801	1.54836	-4.77707	12.0933	-1.50513	-3.69178	3.21353	-1.02688	-1.51746		0.0816807	-0.0175755		0.0814095	0.0175728		1.93251	1.4695		-137.023	35.7811
47_Benzene-Benzene_TS_0.95	3.26701	-3.31109	-3.38105	-7.20088	-8.21849	1.01761	-3.15521	7.41784	-0.995628	-2.14744	1.80965	-0.657832	-1.16169		0.0760204	-0.0104541		0.0758017	0.0104535		2.28222	1.7348		-71.226	25.3267
47_Benzene-Benzene_TS_1.00	1.74282	-2.63262	-2.65196	-5.66739	-6.33351	0.666122	-2.14726	4.55634	-0.666255	-1.27568	1.0245	-0.415074	-0.899797		0.0724384	-0.0036597		0.0722491	0.00365968		2.63936	2.01434		-39.2389	20.2586
47_Benzene-Benzene_TS_1.05	0.834617	-2.1059	-2.09393	-4.49545	-4.92976	0.434304	-1.51083	2.79754	-0.452093	-0.775344	0.582767	-0.259516	-0.705243		0.0703896	0.00285012		0.0702159	0.0028501		2.9755	2.29019		-20.5043	17.3259
47_Benzene-Benzene_TS_1.10	0.302401	-1.69545	-1.6649	-3.59406	-3.87654	0.282482	-1.10303	1.71774	-0.312306	-0.48408	0.333465	-0.161691	-0.559825		0.0695496	0.00909131		0.069382	0.00909094		3.25834	2.53936		-8.35876	15.4743
47_Benzene-Benzene_TS_1.25	-0.252797	-0.918623	-0.871088	-1.91913	-1.996	0.076871	-0.532257	0.396603	-0.117144	-0.141672	0.0643656	-0.0398371	-0.299836		0.0723102	0.0265602		0.0721219	0.0265508		3.60564	2.95523		10.7925	12.8007
47_Benzene-Benzene_TS_1.50	-0.25449	-0.372796	-0.335829	-0.770948	-0.779495	0.00854705	-0.254533	0.0344179	-0.0343754	-0.0336151	0.00454184	-0.00530219	-0.12359		0.0879498	0.0521672		0.0876116	0.0520964		3.02888	2.66849		23.4185	11.3729
47_Benzene-Benzene_TS_2.00	-0.10232	-0.088199	-0.0728865	-0.182926	-0.183022	9.664e-05	-0.0972335	0.00025534	-0.00534205	-0.0055442	3.62e-05	0.00016594	-0.0290508		0.13558	0.0950582		0.134351	0.0946316		1.8813	1.78333		34.9864	9.93338
48_Pyridine-Pyridine_TS_0.90	4.54426	-4.00873	-3.98942	-8.83493	-10.2123	1.37732	-5.84524	12.0728	-1.6833	-3.63737	2.9758	-1.02173	-1.38941		0.104622	0.00241431		0.104054	0.0024143		1.51147	1.17352		-93.8257	28.6872
48_Pyridine-Pyridine_TS_0.95	2.35127	-3.22872	-3.17545	-7.03919	-7.96978	0.930586	-4.1716	7.67485	-1.15198	-2.23167	1.75056	-0.670866	-1.08617		0.0991575	0.00831802		0.0986736	0.00831773		1.68741	1.32227		-45.7529	21.1355
48_Pyridine-Pyridine_TS_1.00	1.01178	-2.61373	-2.54019	-5.6468	-6.27252	0.625721	-3.06897	4.87917	-0.798419	-1.3948	1.03242	-0.436039	-0.858747		0.0956324	0.0142688		0.095198	0.0142673		1.83997	1.46011		-20.232	17.1719
48_Pyridine-Pyridine_TS_1.05	0.207553	-2.12562	-2.04096	-4.55738	-4.97611	0.418724	-2.32892	3.09794	-0.561473	-0.889789	0.610036	-0.28172	-0.686942		0.0937951	0.0203188		0.0933852	0.0203146		1.95687	1.57674		-4.46738	14.7858
48_Pyridine-Pyridine_TS_1.10	-0.259367	-1.7376	-1.64804	-3.7016	-3.98091	0.279301	-1.82338	1.96595	-0.401939	-0.581705	0.361567	-0.181802	-0.55638		0.0933248	0.0264529		0.092921	0.0264437		2.03008	1.6634		6.17337	13.2428
48_Pyridine-Pyridine_TS_1.25	-0.694246	-0.978397	-0.893305	-2.05665	-2.1382	0.0815517	-1.02737	0.499796	-0.166675	-0.192881	0.0764041	-0.0501975	-0.315237		0.0988145	0.0454624		0.0983356	0.0454155		2.00187	1.72243		24.0958	10.9412
48_Pyridine-Pyridine_TS_1.50	-0.553329	-0.415219	-0.35463	-0.865517	-0.875582	0.0100659	-0.54756	0.0504507	-0.0562193	-0.0544477	0.00604513	-0.00781669	-0.142474		0.124268	0.0787024		0.123319	0.0784598		1.58068	1.4335		37.7531	9.72089
48_Pyridine-Pyridine_TS_2.00	-0.241721	-0.102927	-0.0756681	-0.215971	-0.216109	0.00013857	-0.22957	0.00049381	-0.0126448	-0.0122029	4.733e-05	-0.00048922	-0.0416859		0.209276	0.15263		0.204838	0.150882		0.940763	0.89165		52.3203	9.02289
49_Benzene-Pyridine_TS_0.90	5.23687	-4.13625	-4.18494	-9.22551	-10.738	1.51246	-5.40051	12.3975	-1.76009	-3.85356	3.24447	-1.151	-1.45872		0.108677	-0.00585133		0.108041	0.00585123		1.70827	1.28837		-115.272	32.1089
49_Benzene-Pyridine_TS_0.95	2.68841	-3.26389	-3.2469	-7.19191	-8.18486	0.992952	-3.74307	7.61687	-1.18538	-2.27657	1.83457	-0.743386	-1.11711		0.104614	0.00260951		0.104046	0.00260951		1.92139	1.45926		-54.4269	22.6159
49_Benzene-Pyridine_TS_1.00	1.17912	-2.59149	-2.53538	-5.65638	-6.3054	0.649021	-2.69653	4.68493	-0.809277	-1.37829	1.04283	-0.473817	-0.865533		0.103281	0.0109443		0.102735	0.0109436		2.09765	1.61343		-24.4972	17.9822
49_Benzene-Pyridine_TS_1.05	0.29726	-2.06935	-1.99125	-4.48357	-4.90602	0.422445	-2.02162	2.88026	-0.561383	-0.857191	0.59571	-0.299902	-0.678788		0.104166	0.0192336		0.103605	0.0192301		2.21781	1.7358		-6.69184	15.2807
49_Benzene-Pyridine_TS_1.10	-0.203003	-1.66263	-1.57362	-3.58207	-3.85633	0.274262	-1.57678	1.77079	-0.397012	-0.549788	0.34235	-0.189575	-0.539417		0.106857	0.0275041		0.106252	0.0274937		2.27176	1.81481		5.10228	13.5577
49_Benzene-Pyridine_TS_1.25	-0.657619	-0.894126	-0.804555	-1.90898	-1.98314	0.0741596	-0.908076	0.410303	-0.159845	-0.17745	0.0669386	-0.0493334	-0.29129		0.123799	0.0527297		0.122861	0.0526566		2.10222	1.78756		24.8384	11.0021
49_Benzene-Pyridine_TS_1.50	-0.527616	-0.357649	-0.294202	-0.764933	-0.773076	0.00814209	-0.511931	0.0357848	-0.05147	-0.049031	0.00479613	-0.00723509	-0.124033		0.173479	0.0973336		0.170926	0.0968758		1.49421	1.35771		40.4769	9.51536
49_Benzene-Pyridine_TS_2.00	-0.236668	-0.0822566	-0.0545698	-0.180886	-0.180975	8.873e-05	-0.226916	0.00026648	-0.010019	-0.00977384	3.516e-05	-0.00028031	-0.0324887		0.322012	0.20235		0.306512	0.19833		0.79715	0.763442		58.295	8.00248
50_Benzene-Ethyne_CH-pi_0.90	2.78559	-2.77263	-2.52391	-6.27189	-7.17573	0.903844	-4.25584	9.07765	-2.03621	-2.6307	1.73513	-1.14064	-1.0744		0.184148	0.046959		0.181103	0.0469073		1.47371	0.996795		-77.6937	29.9663
50_Benzene-Ethyne_CH-pi_0.95	0.926904	-2.1564	-1.90626	-4.83271	-5.41702	0.584309	-3.20336	5.50154	-1.37128	-1.60259	0.961829	-0.73052	-0.814821		0.189544	0.0615705		0.186228	0.0614541		1.50864	1.05641		-23.4625	20.6254
50_Benzene-Ethyne_CH-pi_1.00	-0.111989	-1.68653	-1.44587	-3.75596	-4.13122	0.37526	-2.51142	3.33256	-0.933131	-1.00767	0.536319	-0.461782	-0.623762		0.199069	0.0768293		0.195238	0.0766035		1.49555	1.09041		2.89516	16.1256
50_Benzene-Ethyne_CH-pi_1.05	-0.667033	-1.326	-1.1003	-2.94163	-3.18123	0.239603	-2.03935	2.01503	-0.642718	-0.654173	0.300754	-0.289298	-0.48284		0.212393	0.0930223		0.207759	0.0926224		1.44244	1.09678		18.6521	13.5016
50_Benzene-Ethyne_CH-pi_1.10	-0.937074	-1.04875	-0.840262	-2.32215	-2.47456	0.152404	-1.70465	1.217	-0.449417	-0.438764	0.169738	-0.180391	-0.378953		0.229294	0.110369		0.223494	0.109703		1.36224	1.07803		29.2375	11.8237
50_Benzene-Ethyne_CH-pi_1.25	-1.01647	-0.538327	-0.380979	-1.19568	-1.23423	0.038551	-1.11085	0.265714	-0.171336	-0.158161	0.031211	-0.0443865	-0.19864		0.300632	0.17116		0.287903	0.168706		1.07637	0.932535		47.6229	9.30653
50_Benzene-Ethyne_CH-pi_1.50	-0.659758	-0.200895	-0.106387	-0.456635	-0.460395	0.00375904	-0.632092	0.02072	-0.0483858	-0.0445384	0.00198493	-0.00583232	-0.080772		0.486047	0.307561		0.437146	0.293971		0.722419	0.671051		62.9653	7.70864
50_Benzene-Ethyne_CH-pi_2.00	-0.246835	-0.0412954	-0.0052086	-0.100665	-0.100697	3.27e-05	-0.239968	0.00011719	-0.00698449	-0.00701567	1.872e-05	1.246e-05	-0.0192522		1.16465	0.775993		0.758699	0.613062		0.419493	0.407629		78.9642	6.15891
51_Ethyne-Ethyne_TS_0.90	0.459651	-0.947705	-0.741494	-2.20418	-2.58328	0.379092	-3.40232	5.03315	-1.17119	-1.59794	1.11251	-0.685759	-0.2422		0.30487	0.122076		0.291619	0.121177		0.647849	0.481947		-31.2316	16.4566
51_Ethyne-Ethyne_TS_0.95	-0.192209	-0.740623	-0.546515	-1.71202	-1.96667	0.254641	-2.62748	3.2252	-0.789937	-1.03879	0.68819	-0.43934	-0.185101		0.330102	0.150806		0.313464	0.14912		0.651585	0.500971		11.5479	11.1209
51_Ethyne-Ethyne_TS_1.00	-0.54407	-0.580481	-0.400384	-1.33863	-1.50835	0.169718	-2.07004	2.06374	-0.53777	-0.684507	0.426533	-0.279795	-0.142564		0.364742	0.18361		0.342661	0.180591		0.646668	0.513315		32.6279	8.54957
51_Ethyne-Ethyne_TS_1.05	-0.712978	-0.456437	-0.291343	-1.05317	-1.16548	0.112303	-1.66101	1.3176	-0.369571	-0.45699	0.26467	-0.177252	-0.110168		0.408398	0.220779		0.378084	0.215587		0.634054	0.518655		45.3858	7.01294
51_Ethyne-Ethyne_TS_1.10	-0.772624	-0.360513	-0.210589	-0.834323	-0.908251	0.0739281	-1.35594	0.840204	-0.256884	-0.309488	0.164532	-0.111928	-0.085284		0.4609	0.262517		0.41858	0.253914		0.615308	0.517304		54.0671	5.96805
51_Ethyne-Ethyne_TS_1.25	-0.678824	-0.183491	-0.0753014	-0.432985	-0.45363	0.0206444	-0.801495	0.216319	-0.0936479	-0.105143	0.0396318	-0.0281364	-0.0410016		0.673099	0.418056		0.558389	0.385707		0.540222	0.483705		69.3656	4.18974
51_Ethyne-Ethyne_TS_1.50	-0.397065	-0.0669379	-0.00701521	-0.166353	-0.168729	0.0023757	-0.395679	0.0221797	-0.0235663	-0.0237583	0.00372873	-0.00353681	-0.0165129		1.24944	0.81028		0.780733	0.629553		0.420425	0.396792		81.444	3.38705
51_Ethyne-Ethyne_TS_2.00	-0.1322	-0.0129598	0.00689031	-0.0364754	-0.0365034	2.8e-05	-0.129582	0.00021882	-0.00283648	-0.00284782	3.772e-05	-2.638e-05	-0.00380656		5.00963	3.27047		0.980653	0.956295		0.281484	0.275455		93.0488	2.67924
52_Benzene-AcOH_OH-pi_0.90	1.9958	-3.27863	-3.00944	-7.53289	-8.77614	1.24325	-6.50527	12.0695	-3.56847	-6.23801	4.18499	-1.51545	-0.838888		0.197966	0.0428096		0.194197	0.0427705		1.15797	0.747775		-38.8957	16.3489
52_Benzene-AcOH_OH-pi_0.95	0.248904	-2.66472	-2.40525	-6.07322	-6.94549	0.872278	-5.17045	8.02085	-2.60149	-4.22825	2.68144	-1.05468	-0.645305		0.19788	0.0511778		0.194116	0.0511109		1.1746	0.781429		-4.55337	11.805
52_Benzene-AcOH_OH-pi_1.00	-0.784829	-2.1738	-1.92796	-4.9227	-5.53226	0.609564	-4.20517	5.32718	-1.90684	-2.89918	1.71961	-0.727269	-0.500058		0.200143	0.0599352		0.196251	0.0598279		1.17063	0.805414		14.5699	9.28328
52_Benzene-AcOH_OH-pi_1.05	-1.36458	-1.77905	-1.54868	-4.00869	-4.43286	0.42417	-3.49116	3.53223	-1.40565	-2.01003	1.10269	-0.498311	-0.390747		0.204632	0.0692274		0.200478	0.0690621		1.14824	0.818633		26.8457	7.68725
52_Benzene-AcOH_OH-pi_1.10	-1.65608	-1.46139	-1.24711	-3.28062	-3.57493	0.294303	-2.95267	2.34024	-1.04365	-1.41104	0.707771	-0.340381	-0.308586		0.211233	0.0791139		0.206672	0.0788675		1.11107	0.820911		35.4381	6.60336
52_Benzene-AcOH_OH-pi_1.25	-1.71376	-0.828227	-0.660162	-1.84994	-1.94678	0.0968428	-1.94228	0.676884	-0.448364	-0.528254	0.187945	-0.108055	-0.163766		0.242913	0.112917		0.236049	0.112204		0.952458	0.773825		50.9151	4.86543
52_Benzene-AcOH_OH-pi_1.50	-1.16605	-0.348394	-0.241085	-0.782422	-0.797023	0.0146007	-1.11873	0.0845109	-0.131838	-0.135626	0.0208945	-0.0171063	-0.0710512		0.327311	0.18204		0.311072	0.179097		0.699386	0.625655		63.8379	3.88985
52_Benzene-AcOH_OH-pi_2.00	-0.453643	-0.0833743	-0.0411073	-0.192075	-0.192375	0.00030012	-0.434669	0.00127453	-0.0202481	-0.0198387	0.00029185	-0.00070118	-0.0200221		0.543002	0.339544		0.47719	0.321516		0.441889	0.422221		75.8414	3.34735
53_Benzene-AcNH2_NH-pi_0.90	1.27666	-2.76663	-2.43851	-6.45131	-7.63295	1.18165	-7.66475	11.7885	-2.84713	-5.8766	4.38492	-1.35544	-0.527505		0.239411	0.0630377		0.232831	0.0629128		0.841685	0.613716		-28.6505	11.8381
53_Benzene-AcNH2_NH-pi_0.95	-0.134629	-2.27329	-1.95706	-5.29368	-6.16045	0.86677	-6.16074	8.12849	-2.10237	-4.133	2.97247	-0.941836	-0.40236		0.251357	0.0747527		0.243774	0.0745447		0.85926	0.64064		2.82399	8.43994
53_Benzene-AcNH2_NH-pi_1.00	-0.982364	-1.87444	-1.57522	-4.3633	-4.99612	0.632822	-5.019	5.60767	-1.57104	-2.93552	2.01397	-0.649487	-0.309471		0.26485	0.086739		0.256022	0.0864145		0.869357	0.662106		20.7184	6.52687
53_Benzene-AcNH2_NH-pi_1.05	-1.4604	-1.55065	-1.27139	-3.61005	-4.06997	0.459918	-4.13951	3.86689	-1.18777	-2.10529	1.36284	-0.445323	-0.240321		0.279236	0.0989568		0.268947	0.0984758		0.872096	0.677654		32.29	5.31359
53_Benzene-AcNH2_NH-pi_1.10	-1.69712	-1.28774	-1.02976	-2.99897	-3.33216	0.333191	-3.45496	2.66724	-0.909398	-1.52691	0.921891	-0.304379	-0.188863		0.294055	0.111318		0.282111	0.110635		0.868018	0.68715		40.3741	4.49301
53_Benzene-AcNH2_NH-pi_1.25	-1.69898	-0.75488	-0.559509	-1.75941	-1.8841	0.12469	-2.13346	0.874838	-0.440358	-0.628138	0.283958	-0.0961781	-0.0991856		0.338573	0.14864		0.320691	0.147025		0.824673	0.683579		54.5847	3.18663
53_Benzene-AcNH2_NH-pi_1.50	-1.12598	-0.335126	-0.219731	-0.781078	-0.804411	0.0233336	-1.09535	0.136125	-0.166751	-0.191968	0.0391315	-0.013914	-0.0418812		0.40771	0.207973		0.377537	0.203616		0.713083	0.61887		65.3607	2.43111
53_Benzene-AcNH2_NH-pi_2.00	-0.375783	-0.0797613	-0.0436248	-0.185724	-0.186304	0.00057983	-0.338996	0.00254509	-0.0393326	-0.03983	0.00060443	-0.00010699	-0.0112506		0.505225	0.292873		0.450941	0.281067		0.547865	0.490906		73.6224	2.20419
54_Benzene-Water_OH-pi_0.90	1.01534	-2.02176	-1.83777	-4.60767	-5.33244	0.724765	-4.44903	7.30657	-1.8422	-2.91919	1.82249	-0.7455	-0.496591		0.193844	0.0476716		0.190301	0.0476175		1.03566	0.732397		-30.3923	14.8645
54_Benzene-Water_OH-pi_0.95	-0.214149	-1.60401	-1.41286	-3.63686	-4.12679	0.489922	-3.59318	4.70927	-1.33024	-1.9399	1.11521	-0.505541	-0.378984		0.205509	0.0633604		0.201302	0.0632336		1.01216	0.738687		5.9321	10.4982
54_Benzene-Water_OH-pi_1.00	-0.913939	-1.27618	-1.08605	-2.88501	-3.21495	0.329935	-2.97658	3.03265	-0.970008	-1.31491	0.685403	-0.340503	-0.292465		0.221308	0.0804875		0.21608	0.0802281		0.969238	0.731015		25.6103	8.19544
54_Benzene-Water_OH-pi_1.05	-1.2854	-1.01791	-0.833702	-2.2987	-2.51999	0.221288	-2.52017	1.9495	-0.714721	-0.909227	0.422869	-0.228363	-0.228599		0.241458	0.0994852		0.234713	0.0989965		0.912119	0.710594		38.1922	6.7922
54_Benzene-Water_OH-pi_1.10	-1.45448	-0.814492	-0.638983	-1.84055	-1.98855	0.148001	-2.17383	1.25233	-0.532984	-0.642284	0.262285	-0.152985	-0.181442		0.26631	0.120751		0.257341	0.11988		0.846685	0.679969		47.0797	5.87305
54_Benzene-Water_OH-pi_1.25	-1.41399	-0.426005	-0.282364	-0.973355	-1.01692	0.0435681	-1.50588	0.330461	-0.238574	-0.256339	0.0642514	-0.0464862	-0.0998217		0.374079	0.202777		0.350367	0.198732		0.64637	0.557972		63.6307	4.49206
54_Benzene-Water_OH-pi_1.50	-0.963615	-0.156841	-0.0610839	-0.374236	-0.3796	0.00536428	-0.919624	0.0353056	-0.0792963	-0.0781223	0.00610743	-0.00728144	-0.0455529		0.71727	0.439404		0.582843	0.402282		0.406945	0.37464		78.5283	3.71226
54_Benzene-Water_OH-pi_2.00	-0.415699	-0.0286701	0.0141454	-0.0801069	-0.0801806	7.362e-05	-0.400663	0.00040735	-0.0154431	-0.0152053	6.919e-05	-0.00030702	-0.0142614		4.51522	2.94777		0.976342	0.946992		0.199936	0.192516		93.5237	3.20853
55_Benzene-MeOH_OH-pi_0.90	3.1577	-3.5164	-3.48817	-7.60408	-8.79499	1.19091	-5.59468	11.1264	-2.37401	-4.20988	2.97675	-1.14088	-0.968894		0.0855884	0.00403023		0.0852766	0.00403019		1.35916	0.954245		-65.5701	20.1192
55_Benzene-MeOH_OH-pi_0.95	1.27258	-2.84639	-2.77425	-6.12704	-6.95549	0.828451	-4.36481	7.35244	-1.71506	-2.80375	1.86873	-0.78004	-0.756212		0.0900971	0.0128348		0.0897336	0.0128338		1.40374	1.00776		-24.9317	14.8153
55_Benzene-MeOH_OH-pi_1.00	0.0984955	-2.31005	-2.21004	-4.95672	-5.52999	0.573267	-3.49832	4.84724	-1.25043	-1.89452	1.1744	-0.530312	-0.594271		0.0965982	0.0221257		0.0961506	0.0221203		1.41689	1.0438		-1.96368	11.8478
55_Benzene-MeOH_OH-pi_1.05	-0.61101	-1.87917	-1.76268	-4.02412	-4.41865	0.394532	-2.87596	3.18554	-0.920588	-1.29994	0.73856	-0.359208	-0.470498		0.104965	0.0319865		0.104391	0.0319701		1.39922	1.05994		12.9359	9.9611
55_Benzene-MeOH_OH-pi_1.10	-1.01699	-1.53333	-1.40839	-3.2803	-3.55073	0.270437	-2.42066	2.08924	-0.685569	-0.907987	0.465543	-0.243126	-0.37601		0.115095	0.0424718		0.11434	0.0424335		1.35512	1.05604		23.4615	8.67438
55_Benzene-MeOH_OH-pi_1.25	-1.3292	-0.849629	-0.726144	-1.82121	-1.90648	0.0852697	-1.60647	0.582304	-0.305041	-0.346892	0.118103	-0.0762521	-0.205036		0.155756	0.0783647		0.1539	0.0781252		1.13367	0.952761		42.7394	6.59278
55_Benzene-MeOH_OH-pi_1.50	-1.00298	-0.343087	-0.250757	-0.746199	-0.757941	0.0117421	-0.969362	0.0670279	-0.100642	-0.100093	0.012033	-0.012582	-0.0902452		0.256557	0.155479		0.248509	0.153633		0.769784	0.69738		59.451	5.34923
55_Benzene-MeOH_OH-pi_2.00	-0.43584	-0.0753175	-0.0326394	-0.171852	-0.172043	0.00019164	-0.417419	0.00083018	-0.019251	-0.0186416	0.00013892	-0.00074835	-0.0236862		0.591854	0.395325		0.509332	0.36764		0.411701	0.393551		76.8023	4.1739
56_Benzene-MeNH2_NH-pi_0.90	4.16391	-3.54395	-3.64899	-7.77884	-9.03315	1.25431	-4.59618	10.2165	-1.4564	-3.27877	2.71599	-0.89362	-1.03523		0.0814545	-0.0146032		0.0811856	0.0146017		1.69246	1.28521		-102.452	25.4716
56_Benzene-MeNH2_NH-pi_0.95	2.26874	-2.8583	-2.90397	-6.22154	-7.08606	0.864527	-3.34988	6.63389	-1.01527	-2.09131	1.673	-0.596953	-0.807829		0.0797023	-0.0079257		0.0794504	0.00792545		1.85724	1.42528		-52.7447	18.7808
56_Benzene-MeNH2_NH-pi_1.00	1.07304	-2.31177	-2.31749	-4.99647	-5.58909	0.592622	-2.50949	4.29737	-0.714848	-1.35187	1.03284	-0.395818	-0.634754		0.0793229	-0.00123562		0.0790746	0.00123562		1.99103	1.54961		-25.6036	15.1457
56_Benzene-MeNH2_NH-pi_1.05	0.289176	-1.84588	-1.82388	-3.9641	-4.35676	0.392656	-1.90043	2.68613	-0.496524	-0.860313	0.616854	-0.253065	-0.494125		0.0802069	0.00599494		0.0799502	0.00599483		2.08589	1.65381		-7.46317	12.7526
56_Benzene-MeNH2_NH-pi_1.10	-0.172344	-1.47214	-1.43307	-3.14438	-3.40095	0.256565	-1.48171	1.65704	-0.347678	-0.553789	0.365845	-0.159734	-0.386806		0.0823247	0.0134483		0.0820471	0.013447		2.12213	1.71882		4.97477	11.1653
56_Benzene-MeNH2_NH-pi_1.25	-0.589546	-0.774496	-0.720429	-1.63671	-1.70816	0.0714476	-0.846898	0.392908	-0.135557	-0.174249	0.0799879	-0.0412955	-0.20129		0.0948433	0.036167		0.0944196	0.0361434		1.93259	1.66594		25.7921	8.80628
56_Benzene-MeNH2_NH-pi_1.50	-0.46102	-0.294747	-0.252736	-0.61996	-0.628087	0.00812733	-0.456471	0.0355784	-0.0401266	-0.0415431	0.00661444	-0.0051979	-0.0799893		0.132382	0.0767348		0.131237	0.0765099		1.35816	1.24841		42.354	7.34863
56_Benzene-MeNH2_NH-pi_2.00	-0.180936	-0.0590665	-0.0415481	-0.126262	-0.126348	8.611e-05	-0.174567	0.00027321	-0.00664224	-0.00652687	6.143e-05	-0.0001768	-0.0172458		0.254903	0.174114		0.247005	0.171533		0.723285	0.696772		60.5549	5.77176
57_Benzene-Peptide_NH-pi_0.90	5.8771	-5.22525	-5.34054	-11.539	-13.4157	1.8767	-7.62414	16.4051	-2.90389	-5.89184	4.53879	-1.55084	-1.57487		0.0921118	-0.0109116		0.0917235	0.010911		1.51348	1.09603		-93.83	25.1434
57_Benzene-Peptide_NH-pi_0.95	2.58498	-4.12689	-4.14086	-9.00806	-10.2496	1.24157	-5.5814	10.2239	-2.05756	-3.69092	2.6655	-1.03214	-1.1944		0.0895419	-0.0016897		0.0891851	0.0016897		1.61394	1.17923		-37.5878	17.3676
57_Benzene-Peptide_NH-pi_1.00	0.660378	-3.28205	-3.23195	-7.09976	-7.91993	0.820173	-4.25648	6.39752	-1.48067	-2.3793	1.58003	-0.68139	-0.91676		0.0899235	0.00769113		0.0895621	0.0076909		1.66799	1.23751		-9.75392	13.5407
57_Benzene-Peptide_NH-pi_1.05	-0.44174	-2.62583	-2.53657	-5.64178	-6.18249	0.540708	-3.37014	4.01135	-1.08295	-1.5781	0.943891	-0.448746	-0.712162		0.0928595	0.0172904		0.0924617	0.0172878		1.67405	1.26693		6.99365	11.275
57_Benzene-Peptide_NH-pi_1.10	-1.04477	-2.11373	-2.00199	-4.51939	-4.87552	0.356135	-2.75949	2.5208	-0.806085	-1.07821	0.568395	-0.296274	-0.56046		0.0980796	0.0271496		0.0976112	0.0271396		1.63776	1.26751		18.2622	9.79663
57_Benzene-Peptide_NH-pi_1.25	-1.49224	-1.14096	-1.01423	-2.42619	-2.5274	0.10121	-1.75467	0.630718	-0.368286	-0.408279	0.128685	-0.088692	-0.294377		0.125744	0.0588022		0.124761	0.0587008		1.38271	1.14284		37.8567	7.46808
57_Benzene-Peptide_NH-pi_1.50	-1.11449	-0.454657	-0.356619	-0.978171	-0.990376	0.0122049	-1.0469	0.0640316	-0.131623	-0.128484	0.0116895	-0.0148277	-0.121083		0.205719	0.120844		0.2015	0.119971		0.934354	0.830001		54.449	5.9156
57_Benzene-Peptide_NH-pi_2.00	-0.501771	-0.101046	-0.0536994	-0.2308	-0.230969	0.00016962	-0.473028	0.00069014	-0.0294321	-0.0284447	0.0001271	-0.00111451	-0.0303196		0.49148	0.305965		0.441086	0.292576		0.48792	0.459339		73.0554	4.41438
58_Pyridine-Pyridine_CH-N_0.90	2.173	-2.70841	-2.2731	-6.82571	-8.13187	1.30616	-9.79122	15.4374	-3.47321	-4.81448	2.98851	-1.64723	-0.325477		0.370209	0.0873852		0.347182	0.0870534		0.697126	0.514588		-69.3366	10.3854
58_Pyridine-Pyridine_CH-N_0.95	0.194276	-2.16558	-1.82906	-5.35568	-6.23661	0.880934	-7.16497	9.68351	-2.32427	-3.01784	1.72075	-1.02717	-0.211931		0.340717	0.0842429		0.322511	0.0839455		0.747481	0.564395		-4.84202	5.28204
58_Pyridine-Pyridine_CH-N_1.00	-1.17039	-1.59144	-1.35577	-3.85188	-4.34867	0.49679	-4.80991	4.99337	-1.35384	-1.62383	0.79097	-0.520981	-0.116353		0.306957	0.0799638		0.293443	0.0797093		0.80082	0.624923		27.643	2.74808
58_Pyridine-Pyridine_CH-N_1.05	-1.62428	-1.20446	-1.03294	-2.86816	-3.15511	0.286947	-3.46208	2.67989	-0.842085	-0.95224	0.384229	-0.274074	-0.0683491		0.281918	0.0766604		0.271342	0.0764361		0.828451	0.666369		41.33	1.73915
58_Pyridine-Pyridine_CH-N_1.10	-1.69521	-0.932909	-0.803578	-2.19357	-2.3625	0.16893	-2.62392	1.481	-0.552294	-0.598563	0.194544	-0.148275	-0.0435093		0.263225	0.0744785		0.254554	0.0742728		0.83599	0.690625		48.7801	1.25199
58_Pyridine-Pyridine_CH-N_1.25	-1.29981	-0.478862	-0.412398	-1.10109	-1.13839	0.0372962	-1.38129	0.279974	-0.198498	-0.201854	0.0298737	-0.0265173	-0.0180362		0.235435	0.0745731		0.229169	0.0743666		0.797152	0.69699		58.8387	0.81645
58_Pyridine-Pyridine_CH-N_1.50	-0.672867	-0.195486	-0.163133	-0.448178	-0.451684	0.00350662	-0.633471	0.0215281	-0.060925	-0.0605415	0.00189892	-0.00228246	-0.00617623		0.249732	0.0902155		0.242291	0.0898506		0.707496	0.645421		64.8445	0.595206
58_Pyridine-Pyridine_CH-N_2.00	-0.196991	-0.0510846	-0.0380624	-0.121907	-0.121947	3.934e-05	-0.183856	0.00017836	-0.0133138	-0.0133762	1.262e-05	4.982e-05	-0.00176303		0.367486	0.146076		0.344933	0.144542		0.66306	0.618287		68.4232	0.612374
59_Ethyne-Water_CH-O_0.90	-1.49002	-0.735712	-0.110442	-2.05772	-2.44478	0.387065	-6.0726	6.37926	-1.79668	-2.04886	1.07685	-0.824668	0.0224199		1.43185	0.738955		0.819848	0.5943		0.338853	0.261487		64.3984	-0.968986
59_Ethyne-Water_CH-O_0.95	-1.99919	-0.584763	-0.0584823	-1.63006	-1.89865	0.268591	-4.95088	4.22325	-1.27157	-1.38747	0.656253	-0.540352	0.0330535		1.53412	0.818165		0.837739	0.63323		0.329247	0.261964		76.6155	-1.26672
59_Ethyne-Water_CH-O_1.00	-2.23149	-0.465653	-0.0190944	-1.29846	-1.48353	0.18507	-4.10799	2.78949	-0.912998	-0.960149	0.400397	-0.353245	0.0357424		1.67863	0.921219		0.85911	0.677542		0.316082	0.258607		83.2492	-1.33343
59_Ethyne-Water_CH-O_1.05	-2.28994	-0.371397	0.0104594	-1.03934	-1.16599	0.126641	-3.46173	1.83672	-0.664937	-0.678898	0.244498	-0.230538	0.0339511		1.87957	1.05796		0.882828	0.726732		0.300239	0.251861		87.5049	-1.29737
59_Ethyne-Water_CH-O_1.10	-2.24298	-0.296927	0.0322593	-0.836494	-0.922713	0.0862193	-2.95837	1.20725	-0.491854	-0.490981	0.149699	-0.150571	0.0300405		2.16054	1.24377		0.907507	0.779344		0.282755	0.242446		90.5301	-1.21248
59_Ethyne-Water_CH-O_1.25	-1.84943	-0.153804	0.0666672	-0.450488	-0.476965	0.0264767	-1.9702	0.33912	-0.21835	-0.210548	0.0347678	-0.04257	0.0172951		4.1699	2.53017		0.972428	0.929999		0.228652	0.205839		96.361	-0.901131
59_Ethyne-Water_CH-O_1.50	-1.1778	-0.053649	0.0728558	-0.180048	-0.183509	0.00346078	-1.14328	0.0398136	-0.0743373	-0.0714608	0.00312551	-0.00600207	0.00623183		-10.3742	-6.58646		0.995386	0.98867		0.157485	0.14787		102.208	-0.540788
59_Ethyne-Water_CH-O_2.00	-0.499964	-0.00638339	0.0464108	-0.0417825	-0.0418373	5.481e-05	-0.484578	0.00051795	-0.0159042	-0.0155849	2.767e-05	-0.00034699	-0.00179938		-2.04385	-1.31895		0.898248	0.796861		0.0862245	0.0834845		108.279	0.389699
60_Ethyne-AcOH_OH-pi_0.90	-0.945865	-1.959	-1.14717	-5.26677	-6.43334	1.16657	-11.2542	14.9683	-4.6599	-8.06433	5.44463	-2.0402	-0.243081		0.695582	0.26136		0.571026	0.252867		0.467981	0.330949		22.0219	5.65948
60_Ethyne-AcOH_OH-pi_0.95	-2.10524	-1.58247	-0.87518	-4.24304	-5.09047	0.847431	-9.06242	10.3421	-3.38489	-5.64106	3.68577	-1.4296	-0.162181		0.726462	0.287791		0.587743	0.276566		0.468202	0.34088		44.5547	3.43236
60_Ethyne-AcOH_OH-pi_1.00	-2.71265	-1.28172	-0.663889	-3.43435	-4.04687	0.612518	-7.3839	7.14343	-2.47217	-3.97045	2.49265	-0.994379	-0.107286		0.765182	0.317551		0.607689	0.302658		0.465114	0.348451		56.9221	2.25129
60_Ethyne-AcOH_OH-pi_1.05	-2.96849	-1.04051	-0.499428	-2.79061	-3.23104	0.440431	-6.08199	4.9281	-1.8146	-2.80954	1.68279	-0.687847	-0.0703868		0.812157	0.351366		0.630432	0.331498		0.458832	0.353394		64.831	1.53723
60_Ethyne-AcOH_OH-pi_1.10	-3.00491	-0.84719	-0.371949	-2.27725	-2.59275	0.315491	-5.06394	3.39907	-1.34004	-2.00091	1.1354	-0.47454	-0.045757		0.86792	0.389817		0.655471	0.363197		0.4497	0.3556		70.3758	1.07164
60_Ethyne-AcOH_OH-pi_1.25	-2.54039	-0.465584	-0.138851	-1.26877	-1.38253	0.11376	-3.09308	1.11303	-0.560347	-0.753369	0.347822	-0.154799	-0.0100254		1.0991	0.540559		0.739667	0.47553		0.410197	0.347283		80.5233	0.317777
60_Ethyne-AcOH_OH-pi_1.50	-1.54435	-0.18377	-0.00221574	-0.523322	-0.543356	0.0200344	-1.56562	0.172802	-0.151532	-0.17536	0.0482661	-0.0244378	0.00416616		1.81377	0.976173		0.875721	0.69853		0.334258	0.304761		89.4669	-0.241353
60_Ethyne-AcOH_OH-pi_2.00	-0.541638	-0.0368563	0.0259808	-0.121549	-0.122132	0.00058369	-0.526606	0.00412236	-0.0191543	-0.0193388	0.0009424	-0.00075784	0.00212956		10.1764	5.77786		0.995207	0.985351		0.230816	0.222715		98.4109	-0.386922
61_Pentane-AcOH_0.90	3.64706	-3.0795	-3.05019	-6.69944	-7.45251	0.753073	-2.55396	7.07467	-0.873644	-1.89013	1.48132	-0.464833	-0.146774		0.0929485	0.00478164		0.0925496	0.00478159		2.62315	1.95455		-138.703	5.58203
61_Pentane-AcOH_0.95	2.42557	-2.58224	-2.55602	-5.55603	-6.09321	0.537177	-1.79223	4.84727	-0.629476	-1.28061	0.966987	-0.315857	-0.10018		0.0813063	0.00510289		0.0810389	0.00510283		3.10007	2.29427		-86.2311	3.56149
61_Pentane-AcOH_1.00	1.59693	-2.17029	-2.14613	-4.62292	-5.0046	0.381684	-1.26253	3.31718	-0.457719	-0.87541	0.631236	-0.213546	-0.0682255		0.0710075	0.00559723		0.0708291	0.00559714		3.66164	2.68736		-57.2845	2.44736
61_Pentane-AcOH_1.05	1.03649	-1.82781	-1.80518	-3.85796	-4.12797	0.270012	-0.892581	2.26523	-0.336154	-0.604083	0.411601	-0.143672	-0.0464046		0.0619248	0.00622903		0.0618064	0.00622891		4.32226	3.13979		-39.2178	1.75582
61_Pentane-AcOH_1.10	0.660863	-1.54348	-1.52222	-3.23104	-3.42144	0.190399	-0.634247	1.545	-0.249887	-0.421853	0.268351	-0.0963846	-0.0317164		0.0539328	0.00693479		0.0538545	0.00693463		5.0943	3.65447		-27.1229	1.30169
61_Pentane-AcOH_1.25	0.138819	-0.944649	-0.927431	-1.93877	-2.00431	0.065534	-0.235458	0.485605	-0.111328	-0.1566	0.0741437	-0.0288711	-0.0112351		0.0356247	0.00919726		0.0356021	0.00919687		8.23404	5.59069		-7.95754	0.644032																	12.0455	-4.25854	3.32596	-1.10654	1.02203
61_Pentane-AcOH_1.50	-0.0232498	-0.382345	-0.373347	-0.767359	-0.774552	0.00719281	-0.0374056	0.0455646	-0.0314088	-0.0343564	0.00558434	-0.00263671	-0.00286842		0.0154386	0.011907		0.0154367	0.0119061		20.5145	11.1511		2.97384	0.366895																	8.29607	-2.87418	2.19192	-0.762626	1.10125
61_Pentane-AcOH_2.00	-0.00145589	-0.0867069	-0.0856438	-0.17173	-0.171803	7.273e-05	0.00379055	0.00036105	-0.00560753	-0.005684	3.425e-05	4.222e-05	0.000186757		-0.00360016	0.00616824		0.00360014	0.00616812		-45.3048	94.5141		0.838551	-0.107567																	5.70928	-1.95874	1.44725	-0.522951	1.17348
62_Pentane-AcNH2_0.90	4.48544	-3.72682	-3.63547	-8.24256	-9.34151	1.09895	-3.80524	9.90617	-1.61549	-2.9852	2.10411	-0.734399	-0.196693		0.119564	0.0124078		0.118719	0.0124069		2.16611	1.52056		-145.937	6.39957																	3.92304	-1.34771	0.956917	-0.357359	1.23545
62_Pentane-AcNH2_0.95	2.77275	-3.05572	-2.97606	-6.67956	-7.44069	0.76113	-2.59595	6.54901	-1.1803	-2.00329	1.30706	-0.484079	-0.12152		0.107394	0.0132067		0.10678	0.0132056		2.57307	1.76883		-82.0207	3.59468																	2.69445	-0.937846	0.63443	-0.24401	1.28429
62_Pentane-AcNH2_1.00	1.66328	-2.5161	-2.446	-5.44217	-5.96749	0.525318	-1.78732	4.32528	-0.874677	-1.37053	0.812637	-0.316784	-0.0730472		0.0967476	0.0141271		0.0962979	0.0141257		3.04487	2.04439		-49.3282	2.16637																	0.869958	-0.33995	0.18721	-0.0780468	1.34089
62_Pentane-AcNH2_1.05	0.949633	-2.07971	-2.01757	-4.45569	-4.8168	0.361108	-1.2435	2.85097	-0.657833	-0.956967	0.505161	-0.206027	-0.0422924		0.087475	0.0151662		0.0871423	0.0151644		3.58317	2.34345		-29.7696	1.32581																	0.131652	-0.0831535	0.025013	-0.0125371	1.20067
62_Pentane-AcNH2_1.10	0.497414	-1.72654	-1.67124	-3.66753	-3.91506	0.247527	-0.877121	1.87737	-0.502833	-0.683619	0.314335	-0.133549	-0.0232248		0.0793907	0.0162753		0.0791417	0.0162732		4.18133	2.65772		-17.0138	0.794394																	0.0028424	-0.0132619	0.0004684	-0.00050873	0.764383
62_Pentane-AcNH2_1.25	-0.0571523	-1.01327	-0.973903	-2.10922	-2.1877	0.0784773	-0.342574	0.532389	-0.246968	-0.286753	0.0760984	-0.0363139	-0.00161858		0.0614179	0.0198106		0.0613024	0.0198067		6.15699	3.57773		2.79344	0.0791115																	1.62237	-0.717169	0.704491	-0.0690758	1.90588
62_Pentane-AcNH2_1.50	-0.145362	-0.452984	-0.430636	-0.924861	-0.935977	0.0111162	-0.112278	0.0638573	-0.0969413	-0.0998778	0.00738203	-0.00444552	-0.00054412		0.0466726	0.0252914		0.0466218	0.0252833		8.23727	4.42054		14.1193	0.0528515																	0.810416	-0.323259	0.317525	-0.0334675	2.70544
62_Pentane-AcNH2_2.00	-0.0573905	-0.114396	-0.107101	-0.23138	-0.231555	0.00017495	-0.0352486	0.00075395	-0.0228959	-0.0230494	6.9e-05	8.448e-05	0.000110147		0.0446173	0.032935		0.0445729	0.0329171		6.56423	3.97939		20.5865	-0.0395107																	0.40333	-0.14694	0.144183	-0.0161147	3.88586
63_Benzene-AcOH_0.90	5.3999	-4.41997	-4.42024	-10.1164	-11.8896	1.77315	-7.08983	14.3948	-1.90504	-6.54125	5.7921	-1.15588	-1.31673		0.144367	-3.05423e-05		0.142885	3.05423e-05		1.4269	1.12469		-113.514	27.6796																	0.200098	-0.06731	0.0659477	-0.00776163	5.6562
63_Benzene-AcOH_0.95	2.77983	-3.49444	-3.43665	-7.90139	-9.07816	1.17676	-4.89526	8.95492	-1.27983	-4.00215	3.46347	-0.741151	-0.997203		0.139993	0.00833779		0.138641	0.0083375		1.61409	1.27956		-53.9934	19.3689																	0.0990372	-0.0309214	0.0302478	-0.00374814	8.36136
63_Benzene-AcOH_1.00	1.21896	-2.77381	-2.68161	-6.21153	-6.98835	0.776825	-3.47681	5.56799	-0.872218	-2.47936	2.07616	-0.469019	-0.761325		0.138597	0.0169006		0.137285	0.0168982		1.78656	1.42826		-24.39	15.2332																	0.0119432	-0.00276475	0.00269249	-0.0004439	29.5334
63_Benzene-AcOH_1.05	0.306932	-2.21009	-2.09957	-4.91165	-5.4218	0.51015	-2.54563	3.45652	-0.603962	-1.55698	1.24745	-0.294434	-0.586428		0.139683	0.0256447		0.13834	0.0256363		1.92945	1.55946		-6.6882	12.7786																	0.00033786	-2.727e-05	2.468e-05	-5.195e-05	156.442
63_Benzene-AcOH_1.10	-0.206927	-1.76874	-1.65058	-3.90816	-4.24198	0.333817	-1.92501	2.14408	-0.426	-0.994123	0.752367	-0.184244	-0.456383		0.142965	0.0345566		0.141526	0.034536		2.03021	1.66234		5.06847	11.1787																	2.9e-07	-1.1e-07	7e-08	2.196e-05	53.7954
63_Benzene-AcOH_1.25	-0.65341	-0.932443	-0.823043	-2.04284	-2.13472	0.0918849	-0.993902	0.508533	-0.168041	-0.291165	0.168499	-0.0453754	-0.227951		0.163687	0.0623189		0.161537	0.0621983		2.05537	1.75812		24.78	8.64482
63_Benzene-AcOH_1.50	-0.479167	-0.345486	-0.274555	-0.762545	-0.772166	0.00962111	-0.473228	0.0428066	-0.0487459	-0.0576608	0.0137622	-0.00484736	-0.0787433		0.229829	0.114397		0.22399	0.113656		1.61137	1.46089		40.678	6.68477
63_Benzene-AcOH_2.00	-0.17264	-0.0669708	-0.040494	-0.155908	-0.155998	8.982e-05	-0.164926	0.00028684	-0.00800066	-0.00797844	0.0001055	-0.00012772	-0.0116857		0.45078	0.246376		0.410956	0.239223		0.945319	0.901583		59.1657	4.00482
64_Peptide-Ethene_0.90	2.3649	-2.53516	-2.30041	-5.80261	-6.71084	0.908226	-4.78012	8.559	-1.41398	-3.04657	2.29282	-0.660228	-0.284217		0.199985	0.0485465		0.196102	0.0484894		1.2139	0.936796		-85.8438	10.3168
64_Peptide-Ethene_0.95	1.10621	-2.07872	-1.86572	-4.69946	-5.33124	0.631781	-3.53551	5.66804	-1.02632	-2.03664	1.44819	-0.437863	-0.20804		0.191413	0.0540001		0.188	0.0539215		1.32921	1.03017		-36.3136	6.82933
64_Peptide-Ethene_1.00	0.327773	-1.70907	-1.51566	-3.82176	-4.2595	0.437737	-2.66996	3.75258	-0.754843	-1.38368	0.917937	-0.289102	-0.154154		0.185142	0.0599771		0.182048	0.0598695		1.43139	1.11591		-10.7427	5.05238
64_Peptide-Ethene_1.05	-0.139214	-1.40854	-1.233	-3.11941	-3.42145	0.302039	-2.05871	2.48181	-0.562313	-0.955398	0.583324	-0.190239	-0.115808		0.180907	0.0664537		0.178017	0.0663074		1.51523	1.19015		4.80618	3.99813
64_Peptide-Ethene_1.10	-0.404596	-1.16436	-1.00517	-2.55687	-2.76471	0.207837	-1.62148	1.64151	-0.424633	-0.67153	0.371983	-0.125086	-0.0882555		0.178537	0.0733753		0.175758	0.0731786		1.57688	1.24963		15.1968	3.31491
64_Peptide-Ethene_1.25	-0.610627	-0.670055	-0.552287	-1.44392	-1.51068	0.0667618	-0.887848	0.475084	-0.197863	-0.260136	0.0980759	-0.0358031	-0.0414538		0.181272	0.0963462		0.178365	0.0959021		1.62631	1.32993		32.5768	2.21155
64_Peptide-Ethene_1.50	-0.41514	-0.264804	-0.19827	-0.562807	-0.570917	0.0081097	-0.401109	0.0497394	-0.0637704	-0.0687468	0.00905793	-0.00408146	-0.0118796		0.215372	0.143679		0.210545	0.142219		1.40313	1.21065		46.64	1.33465
64_Peptide-Ethene_2.00	-0.122669	-0.0450005	-0.025758	-0.0975029	-0.0975564	5.351e-05	-0.11353	0.00026395	-0.00940317	-0.00963632	4.516e-05	0.00018799	-0.00104174		0.377967	0.271946		0.353555	0.262416		0.858831	0.793138		63.0789	0.535684
65_Pyridine-Ethyne_0.90	-1.45912	-1.37555	-0.759633	-3.62527	-4.3602	0.734937	-9.09054	10.9397	-3.30828	-3.84475	2.21657	-1.6801	-0.189743		0.697871	0.288461		0.57229	0.27716		0.398796	0.292388		38.5598	5.0143
65_Pyridine-Ethyne_0.95	-2.18896	-1.13651	-0.62531	-2.94723	-3.48283	0.535599	-7.33449	7.53525	-2.38971	-2.70105	1.4742	-1.16286	-0.138351		0.672831	0.290154		0.558236	0.278661		0.401831	0.303082		53.5312	3.38339
65_Pyridine-Ethyne_1.00	-2.5621	-0.941709	-0.516393	-2.40992	-2.79681	0.386895	-5.99962	5.18017	-1.74265	-1.92246	0.980962	-0.801153	-0.103733		0.652776	0.291692		0.546622	0.280022		0.401678	0.311267		62.1276	2.51538
65_Pyridine-Ethyne_1.05	-2.7025	-0.782645	-0.427752	-1.98028	-2.25749	0.277215	-4.9715	3.55163	-1.28262	-1.38535	0.652884	-0.55015	-0.0807874		0.636058	0.293204		0.536692	0.281359		0.398326	0.316636		67.6693	2.02288
65_Pyridine-Ethyne_1.10	-2.69473	-0.652965	-0.355469	-1.63583	-1.83328	0.197449	-4.17228	2.43157	-0.954012	-1.01175	0.435285	-0.377552	-0.0656623		0.622147	0.295008		0.528256	0.282952		0.39207	0.319105		71.5005	1.74225
65_Pyridine-Ethyne_1.25	-2.27689	-0.388559	-0.206915	-0.950131	-1.01951	0.0693812	-2.63185	0.773588	-0.418631	-0.425893	0.130012	-0.12275	-0.0432962		0.595588	0.305041		0.511706	0.291768		0.361013	0.31147		78.0917	1.48496
65_Pyridine-Ethyne_1.50	-1.44193	-0.177376	-0.0853738	-0.424118	-0.435564	0.0114455	-1.42285	0.112582	-0.131665	-0.128674	0.0175211	-0.0205123	-0.0301687		0.614153	0.350151		0.523336	0.330478		0.298077	0.27283		83.1156	1.73898
65_Pyridine-Ethyne_2.00	-0.578425	-0.0474346	-0.0127551	-0.116142	-0.116422	0.00027975	-0.556414	0.00231723	-0.0243287	-0.0233256	0.0003368	-0.00133985	-0.0160216		0.929597	0.57617		0.680854	0.499233		0.208733	0.199989		88.3582	2.44741
66_MeNH2-Pyridine_0.90	2.81391	-3.34416	-3.32841	-7.37591	-8.62146	1.24556	-7.19247	12.0455	-2.03911	-4.25854	3.32595	-1.10653	-0.894909		0.105407	0.00236041		0.104826	0.0023604		1.0255	0.798986		-59.1957	18.826
66_MeNH2-Pyridine_0.95	1.32979	-2.78052	-2.75821	-6.08468	-6.99283	0.908145	-5.52139	8.29607	-1.44488	-2.87418	2.19192	-0.76262	-0.71618		0.0985703	0.004028		0.0980949	0.00402797		1.10202	0.873449		-27.0002	14.5414
66_MeNH2-Pyridine_1.00	0.369199	-2.31781	-2.29126	-5.03666	-5.69535	0.658688	-4.30566	5.70929	-1.03444	-1.95874	1.44726	-0.522951	-0.577211		0.0927721	0.00576038		0.0923754	0.00576029		1.16978	0.943179		-7.66437	11.9826
66_MeNH2-Pyridine_1.05	-0.236371	-1.93635	-1.90728	-4.18104	-4.65633	0.475296	-3.41126	3.92304	-0.748149	-1.34771	0.956915	-0.357354	-0.468578		0.0877832	0.00756316		0.0874469	0.00756295		1.22566	1.0052		5.19659	10.3016
66_MeNH2-Pyridine_1.10	-0.600994	-1.62209	-1.59178	-3.48224	-3.82397	0.341726	-2.74802	2.69445	-0.547423	-0.937845	0.634429	-0.244007	-0.383571		0.0835045	0.009431		0.0832149	0.00943058		1.26718	1.05668		14.3147	9.13604
66_MeNH2-Pyridine_1.25	-0.937541	-0.969202	-0.939772	-2.05067	-2.17536	0.124686	-1.57671	0.86996	-0.230788	-0.339951	0.187211	-0.0780478	-0.221258		0.0742287	0.0154167		0.074025	0.0154148		1.3006	1.13454		30.561	7.21233
66_MeNH2-Pyridine_1.50	-0.732732	-0.435473	-0.41321	-0.906967	-0.929131	0.0221636	-0.793708	0.131652	-0.0706765	-0.0831535	0.0250129	-0.012536	-0.101087		0.0686761	0.0262324		0.0685147	0.0262234		1.1427	1.04926		43.5502	6.00811
66_MeNH2-Pyridine_2.00	-0.319041	-0.108223	-0.0981267	-0.223472	-0.224063	0.00059058	-0.308582	0.00284239	-0.0133022	-0.0132619	0.0004684	-0.00050874	-0.0294552		0.0829784	0.0489281		0.0826942	0.0488696		0.724192	0.694264		57.5008	5.30872
99_Ar2_test_0.90	1.04404	-0.482431	-0.474542	-1.05104	-1.17006	0.119019	-0.496577	1.62237	-0.0817535	-0.717169	0.704491	-0.0690758			0.0982976	0.0082437		0.0978261	0.00824342		2.11657	1.81737
99_Ar2_test_0.95	0.527633	-0.346697	-0.342515	-0.741092	-0.803816	0.0627236	-0.243583	0.810416	-0.0392009	-0.323259	0.317525	-0.0334675			0.0752747	0.0060678		0.0750623	0.00606769		3.04247	2.6207
99_Ar2_test_1.00	0.26484	-0.251504	-0.249423	-0.529279	-0.562033	0.0327544	-0.119618	0.40333	-0.0188716	-0.14694	0.144183	-0.0161147			0.0565991	0.0041543		0.0565086	0.00415426		4.42474	3.82179
99_Ar2_test_1.05	0.132239	-0.184302	-0.183311	-0.382983	-0.399946	0.0169625	-0.0587347	0.200098	-0.0091239	-0.06731	0.0659477	-0.00776163			0.0418105	0.00269577		0.041774	0.00269576		6.52056	5.64384
99_Ar2_test_1.10	0.0658372	-0.136513	-0.136049	-0.280839	-0.28955	0.00871105	-0.0287783	0.0990372	-0.00442171	-0.0309214	0.0302478	-0.00374814			0.0303685	0.00170236		0.0303545	0.00170236		9.7587	8.459
99_Ar2_test_1.25	0.00807633	-0.0594028	-0.0593495	-0.120002	-0.121117	0.00111413	-0.00335066	0.0119432	-0.00051616	-0.00276475	0.00269249	-0.0004439			0.0105277	0.000448833		0.0105271	0.000448833		35.8146	31.0339
99_Ar2_test_1.50	8.83247e-05	-0.0184236	-0.0184309	-0.0368979	-0.0369286	3.069e-05	-0.000195	0.00033786	-5.454e-05	-2.727e-05	2.468e-05	-5.195e-05			0.00117679	-0.000198076		0.00117679	0.000198076		189.22	147.864
99_Ar2_test_2.00	-9.49555e-05	-0.00306036	-0.00305512	-0.00612439	-0.00612442	3e-08	-0.00011717	2.9e-07	2.192e-05	-1.1e-07	7e-08	2.196e-05			0.00145696	0.000856842		0.00145696	0.000856842		52.2693	64.2981

## Sheet: Reference worksheet
WARNING! This sheet uses indirect cell references: do not add or delete columns unless you know what you are doing
In particular, it is assumed that all data start at row 21
																														RMSD	0.0142435	0.0130924	0.00305884
																															4.35476
	enter column offset																														Extrapolation of MP2-F12				0.0122578	0.00612892
	22	2	3	4	5	6	7	8	9		11								19	20	21	22	23													0.00612892
	Revised reference data		original		revised				scaledS66x8		MP2/AV{Q,5Z}								counterpoise corrected MP2-F12/V{T,Q}Z-F12 +
	used		S66 paper		Hobza	ratio			try1	factor used	-AV{T,Q}Z								HLC(T)	HLC(T*)	HLC(T*)sc	HLC(Tc)sc	HLC(Ts)								raw	CP	half-half		raw	CP	half-half
01_Water-Water_0.90	-4.65882	1	-4.573	1			1	-5.01	-4.68139	1.0237	-4.66139								-4.60198	-4.66179	-4.66574	-4.65882	-4.64191								-0.0101809	0.0079974	-0.00109177		4.68767	4.67432	4.681
01_Water-Water_0.95	-4.95377	2	-4.884	2			1	-5.01	-4.99976	1.0237	-4.98276								-4.90545	-4.95554	-4.95967	-4.95377	-4.93941								-0.00989923	0.00627277	-0.00181323		4.95738	4.94428	4.95083
01_Water-Water_1.00	-4.95065	3	-4.894	3	-5.01	1.0237	1	-5.01	-5.01	1.0237	-4.994								-4.90993	-4.95173	-4.95563	-4.95065	-4.93855								-0.00938649	0.0050025	-0.002192		4.94063	4.9279	4.93427
01_Water-Water_1.05	-4.76839	4	-4.723	4			1	-5.01	-4.83495	1.0237	-4.81995								-4.73439	-4.76913	-4.77255	-4.76839	-4.75828								-0.0087792	0.00405699	-0.0023611		4.75293	4.74069	4.74681
01_Water-Water_1.10	-4.48656	5	-4.451	5			1	-5.01	-4.5565	1.0237	-4.5395								-4.4584	-4.4872	-4.49002	-4.48656	-4.47819								-0.00814165	0.0033572	-0.00239222		4.47095	4.45933	4.46514
01_Water-Water_1.25	-3.47347	6	-3.457	6			1	-5.01	-3.53894	1.0237	-3.52394								-3.45813	-3.4742	-3.47535	-3.47347	-3.4689								-0.00618601	0.00213244	-0.00202678		3.46965	3.46017	3.46491
01_Water-Water_1.50	-2.11314	7	-2.108	7			1	-5.01	-2.15796	1.0237	-2.14296								-2.10814	-2.11369	-2.11375	-2.11314	-2.11165								-0.00405438	0.00119102	-0.00143168		2.12493	2.11959	2.12226
01_Water-Water_2.00	-0.871683	8	-0.871	8			1	-5.01	-0.891645	1.0237	-0.881645								-0.871572	-0.871904	-0.871697	-0.871683	-0.87165								-0.00232639	0.000534775	-0.000895806		0.883575	0.883081	0.883328
02_Water-MeOH_0.90	-5.29278	9	-5.194	9			2	-5.7	-5.31618	1.02352	-5.28418								-5.22156	-5.3007	-5.30352	-5.29278	-5.27463								-0.0106496	0.0115538	0.00045212		5.40092	5.39181	5.39637
02_Water-MeOH_0.95	-5.63046	10	-5.55	10			2	-5.7	-5.68055	1.02352	-5.65055								-5.56892	-5.63691	-5.63975	-5.63046	-5.61479								-0.0103158	0.0094783	-0.000418752		5.69634	5.68734	5.69184
02_Water-MeOH_1.00	-5.63423	11	-5.569	11	-5.7	1.02352	2	-5.7	-5.7	1.02352	-5.672								-5.58148	-5.63974	-5.6422	-5.63423	-5.62079								-0.00958754	0.00797535	-0.000806092		5.67209	5.6632	5.66764
02_Water-MeOH_1.05	-5.43386	12	-5.381	12			2	-5.7	-5.50758	1.02352	-5.48158								-5.38901	-5.43884	-5.44066	-5.43386	-5.42244								-0.00885226	0.00670243	-0.00107491		5.45452	5.44583	5.45017
02_Water-MeOH_1.10	-5.11853	13	-5.076	13			2	-5.7	-5.1954	1.02352	-5.1714								-5.08063	-5.12324	-5.12428	-5.11853	-5.10887								-0.00800102	0.00580141	-0.0010998		5.12972	5.12135	5.12554
02_Water-MeOH_1.25	-3.96658	14	-3.944	14			2	-5.7	-4.03678	1.02352	-4.01778								-3.94444	-3.97118	-3.96994	-3.96658	-3.96092								-0.00549743	0.00417767	-0.000659878		3.97325	3.96613	3.96969
02_Water-MeOH_1.50	-2.39407	15	-2.385	15			2	-5.7	-2.4411	1.02352	-2.4241								-2.38565	-2.39868	-2.39535	-2.39407	-2.39192								-0.00285215	0.00251556	-0.000168294		2.40966	2.40498	2.40732
02_Water-MeOH_2.00	-0.954668	16	-0.951	16			2	-5.7	-0.97337	1.02352	-0.96537								-0.953696	-0.959247	-0.954816	-0.954668	-0.954419								-0.0012847	0.000869804	-0.000207446		0.968248	0.967437	0.967843
03_Water-MeNH2_0.90	-6.57684	17	-6.493	17			3	-7.04	-6.64883	1.024	-6.62383								-6.4968	-6.59852	-6.59049	-6.57684	-6.56049								-0.00866544	0.0117565	0.00154552		6.80362	6.79748	6.80055
03_Water-MeNH2_0.95	-6.93748	18	-6.87	18			3	-7.04	-7.03488	1.024	-7.01188								-6.86744	-6.95735	-6.94946	-6.93748	-6.9232								-0.00847787	0.00974526	0.000633699		7.09741	7.09116	7.09428
03_Water-MeNH2_1.00	-6.9286	19	-6.875	19	-7.04	1.024	3	-7.04	-7.04	1.024	-7.019								-6.86771	-6.94716	-6.93904	-6.9286	-6.9162								-0.00804361	0.00811143	3.39129e-05		7.04025	7.03381	7.03703
03_Water-MeNH2_1.05	-6.68924	20	-6.648	20			3	-7.04	-6.80755	1.024	-6.78555								-6.63663	-6.7069	-6.69828	-6.68924	-6.67853								-0.00744193	0.0068004	-0.000320765		6.76721	6.76058	6.7639
03_Water-MeNH2_1.10	-6.31548	21	-6.284	21			3	-7.04	-6.43482	1.024	-6.41382								-6.27027	-6.33255	-6.32326	-6.31548	-6.30628								-0.00675702	0.00575877	-0.000499123		6.37087	6.36412	6.36749
03_Water-MeNH2_1.25	-4.93163	22	-4.919	22			3	-7.04	-5.03706	1.024	-5.01606								-4.90358	-4.94784	-4.93647	-4.93163	-4.92591								-0.0046886	0.00376402	-0.000462292		4.95807	4.95145	4.95476
03_Water-MeNH2_1.50	-2.9817	23	-2.977	23			3	-7.04	-3.04845	1.024	-3.03245								-2.96957	-2.99759	-2.9838	-2.9817	-2.97922								-0.00290946	0.00209236	-0.00040855		3.00358	2.99882	3.0012
03_Water-MeNH2_2.00	-1.14331	24	-1.14	24			3	-7.04	-1.16736	1.024	-1.15736								-1.14093	-1.15928	-1.14372	-1.14331	-1.14282								-0.0020304	0.000572138	-0.000729129		1.16191	1.16029	1.1611
04_Water-Peptide_0.90	-7.74844	25	-7.634	25			4	-8.22	-7.77108	1.01796	-7.74008								-7.66675	-7.78864	-7.76108	-7.74844	-7.73107								-0.0129372	0.0138914	0.000477096		7.7104	7.69525	7.70283
04_Water-Peptide_0.95	-8.14892	26	-8.055	26			4	-8.22	-8.19964	1.01796	-8.16964								-8.07656	-8.18707	-8.16013	-8.14892	-8.13355								-0.0127005	0.0116769	-0.000511773		8.07689	8.06221	8.06955
04_Water-Peptide_1.00	-8.153	27	-8.075	27	-8.22	1.01796	4	-8.22	-8.22	1.01796	-8.191								-8.08946	-8.18978	-8.16285	-8.153	-8.13951								-0.0119598	0.0100022	-0.000978794		8.06003	8.0457	8.05287
04_Water-Peptide_1.05	-7.90748	28	-7.843	28			4	-8.22	-7.98383	1.01796	-7.95583								-7.85215	-7.94343	-7.91606	-7.90748	-7.89573								-0.0109137	0.00873995	-0.00108689		7.80396	7.79	7.79698
04_Water-Peptide_1.10	-7.51416	29	-7.462	29			4	-8.22	-7.59599	1.01796	-7.56899								-7.46632	-7.54966	-7.52158	-7.51416	-7.504								-0.00974726	0.00780211	-0.000972574		7.4078	7.3943	7.40105
04_Water-Peptide_1.25	-6.02344	30	-5.994	30			4	-8.22	-6.10163	1.01796	-6.08063								-5.99359	-6.05871	-6.02808	-6.02344	-6.0171								-0.00623988	0.00619737	-2.12535e-05		5.93283	5.92118	5.927
04_Water-Peptide_1.50	-3.84403	31	-3.832	31			4	-8.22	-3.90081	1.01796	-3.88581								-3.83164	-3.87961	-3.84596	-3.84403	-3.84139								-0.00263801	0.00453546	0.000948723		3.7935	3.78607	3.78979
04_Water-Peptide_2.00	-1.44228	32	-1.436	32			4	-8.22	-1.46179	1.01796	-1.45879								-1.44129	-1.47792	-1.44244	-1.44228	-1.44207								-0.00102123	0.00161461	0.000296693		1.42681	1.42589	1.42635
05_MeOH-MeOH_0.90	-5.39588	33	-5.279	33			5	-5.85	-5.37548	1.01828	-5.33648								-5.31144	-5.39638	-5.41021	-5.39588	-5.37674								-0.00866048	0.0124184	0.00187898		5.48342	5.47475	5.47909
05_MeOH-MeOH_0.95	-5.78687	34	-5.691	34			5	-5.85	-5.79501	1.01828	-5.76401								-5.71343	-5.78601	-5.79934	-5.78687	-5.77022								-0.00837688	0.0103846	0.00100385		5.82769	5.81892	5.8233
05_MeOH-MeOH_1.00	-5.82437	35	-5.745	35	-5.85	1.01828	5	-5.85	-5.85	1.01828	-5.821								-5.76091	-5.8227	-5.83516	-5.82437	-5.80998								-0.00780451	0.00881338	0.000504437		5.83448	5.82564	5.83006
05_MeOH-MeOH_1.05	-5.64391	36	-5.578	36			5	-5.85	-5.67995	1.01828	-5.65295								-5.58942	-5.64185	-5.65319	-5.64391	-5.63155								-0.00700196	0.00768659	0.000342318		5.63563	5.62681	5.63122
05_MeOH-MeOH_1.10	-5.33682	37	-5.283	37			5	-5.85	-5.37956	1.01828	-5.35456								-5.29027	-5.33465	-5.34475	-5.33682	-5.32625								-0.00630176	0.00670852	0.000203377		5.31908	5.31042	5.31475
05_MeOH-MeOH_1.25	-4.17157	38	-4.141	38			5	-5.85	-4.21668	1.01828	-4.19468								-4.14321	-4.16975	-4.1764	-4.17157	-4.16511								-0.00409635	0.00498155	0.000442597		4.15337	4.14561	4.14949
05_MeOH-MeOH_1.50	-2.53824	39	-2.524	39			5	-5.85	-2.57013	1.01828	-2.55313								-2.52622	-2.53696	-2.54029	-2.53824	-2.5355								-0.00178507	0.00324941	0.000732168		2.53878	2.53317	2.53598
05_MeOH-MeOH_2.00	-1.01501	40	-1.009	40			5	-5.85	-1.02744	1.01828	-1.01944								-1.01274	-1.01419	-1.0154	-1.01501	-1.01449								-0.000477889	0.00133781	0.000429962		1.02436	1.02229	1.02333
06_MeOH-MeNH2_0.90	-7.06731	41	-6.972	41			6	-7.67	-7.09221	1.01724	-7.05921								-6.95434	-7.07397	-7.08835	-7.06731	-7.04668								-0.00752964	0.0133133	0.00289181		7.3202	7.31449	7.31734
06_MeOH-MeNH2_0.95	-7.54963	42	-7.472	42			6	-7.67	-7.60083	1.01724	-7.56983								-7.45022	-7.55458	-7.5682	-7.54963	-7.53149								-0.00726695	0.011306	0.00201951		7.72008	7.7141	7.71709
06_MeOH-MeNH2_1.00	-7.60314	43	-7.54	43	-7.67	1.01724	6	-7.67	-7.67	1.01724	-7.641								-7.51609	-7.60687	-7.61943	-7.60314	-7.58726								-0.00681399	0.00965255	0.00141928		7.71329	7.70703	7.71016
06_MeOH-MeNH2_1.05	-7.38503	44	-7.335	44			6	-7.67	-7.46147	1.01724	-7.43447								-7.30921	-7.38799	-7.39924	-7.38503	-7.37119								-0.0062469	0.00828522	0.00101916		7.45278	7.44628	7.44953
06_MeOH-MeNH2_1.10	-7.00455	45	-6.967	45			6	-7.67	-7.08712	1.01724	-7.06112								-6.93879	-7.00707	-7.01689	-7.00455	-6.99253								-0.00563304	0.00716583	0.000766397		7.04386	7.03723	7.04055
06_MeOH-MeNH2_1.25	-5.51719	46	-5.503	46			6	-7.67	-5.59788	1.01724	-5.57488								-5.47514	-5.51937	-5.52511	-5.51719	-5.50948								-0.0037992	0.00496373	0.00058227		5.52185	5.51537	5.51861
06_MeOH-MeNH2_1.50	-3.35163	47	-3.349	47			6	-7.67	-3.40674	1.01724	-3.38974								-3.33221	-3.35403	-3.35529	-3.35163	-3.34805								-0.00224972	0.00306624	0.000408257		3.35789	3.35313	3.35551
06_MeOH-MeNH2_2.00	-1.2771	48	-1.274	48			6	-7.67	-1.29597	1.01724	-1.28897								-1.27246	-1.27993	-1.27798	-1.2771	-1.27624								-0.00180085	0.0010427	-0.000379072		1.29058	1.28881	1.28969
07_MeOH-Peptide_0.90	-7.78382	49	-7.629	49			7	-8.34	-7.74037	1.0146	-7.71337								-7.67205	-7.80297	-7.80244	-7.78382	-7.76165								-0.0121894	0.0153148	0.00156267		7.71245	7.6962	7.70432
07_MeOH-Peptide_0.95	-8.27017	50	-8.14	50			7	-8.34	-8.25883	1.0146	-8.23383								-8.1702	-8.28732	-8.28683	-8.27017	-8.25035								-0.011759	0.0131784	0.000709707		8.1616	8.14533	8.15347
07_MeOH-Peptide_1.00	-8.32956	51	-8.22	51	-8.34	1.0146	7	-8.34	-8.34	1.0146	-8.315								-8.24072	-8.34538	-8.34438	-8.32956	-8.31195								-0.0109244	0.0115359	0.000305744		8.19818	8.18183	8.19
07_MeOH-Peptide_1.05	-8.11612	52	-8.024	52			7	-8.34	-8.14114	1.0146	-8.11614								-8.03762	-8.13118	-8.12922	-8.11612	-8.10055								-0.0098403	0.0102685	0.000214102		7.97366	7.95727	7.96546
07_MeOH-Peptide_1.10	-7.73713	53	-7.66	53			7	-8.34	-7.77182	1.0146	-7.74782								-7.66812	-7.75185	-7.74866	-7.73713	-7.72344								-0.00867267	0.00929567	0.000311496		7.59248	7.57616	7.58432
07_MeOH-Peptide_1.25	-6.2281	54	-6.182	54			7	-8.34	-6.27225	1.0146	-6.24625								-6.1822	-6.24286	-6.23578	-6.2281	-6.21898								-0.00522365	0.00750233	0.00113934		6.10543	6.08998	6.0977
07_MeOH-Peptide_1.50	-3.66818	55	-3.648	55			7	-8.34	-3.70126	1.0146	-3.68026								-3.6482	-3.6834	-3.67152	-3.66818	-3.6642								-0.00111537	0.00522659	0.00205561		3.60532	3.59382	3.59957
07_MeOH-Peptide_2.00	-1.10412	56	-1.096	56			7	-8.34	-1.112	1.0146	-1.105								-1.10121	-1.12049	-1.10461	-1.10412	-1.10354								-0.000130982	0.00151343	0.000691225		1.0915	1.08967	1.09058
08_MeOH-Water_0.90	-4.6843	57	-4.587	57			8	-5.09	-4.67237	1.01861	-4.64237								-4.61706	-4.69053	-4.69448	-4.6843	-4.66717								-0.0105361	0.00868625	-0.000924904		4.69979	4.68711	4.69345
08_MeOH-Water_0.95	-5.03233	58	-4.952	58			8	-5.09	-5.04416	1.01861	-5.01716								-4.97458	-5.03736	-5.04109	-5.03233	-5.01762								-0.0101196	0.00704919	-0.00153519		5.01746	5.00472	5.01109
08_MeOH-Water_1.00	-5.06346	59	-4.997	59	-5.09	1.01861	8	-5.09	-5.09	1.01861	-5.065								-5.01421	-5.06786	-5.07094	-5.06346	-5.05091								-0.00954005	0.00582601	-0.00185702		5.03198	5.01932	5.02565
08_MeOH-Water_1.05	-4.90126	60	-4.847	60			8	-5.09	-4.93721	1.01861	-4.91421								-4.85956	-4.90545	-4.9076	-4.90126	-4.89063								-0.00892868	0.00489574	-0.00201647		4.86304	4.85067	4.85685
08_MeOH-Water_1.10	-4.62922	61	-4.586	61			8	-5.09	-4.67135	1.01861	-4.65135								-4.59412	-4.63345	-4.63456	-4.62922	-4.62027								-0.00834354	0.00419111	-0.00207622		4.59071	4.57882	4.58476
08_MeOH-Water_1.25	-3.61094	62	-3.589	62			8	-5.09	-3.6558	1.01861	-3.6388								-3.59055	-3.61565	-3.61405	-3.61094	-3.60573								-0.00662722	0.00292745	-0.00184988		3.58754	3.57758	3.58256
08_MeOH-Water_1.50	-2.20797	63	-2.199	63			8	-5.09	-2.23993	1.01861	-2.22593								-2.19993	-2.2128	-2.20919	-2.20797	-2.20591								-0.0047692	0.00174132	-0.00151394		2.20799	2.20192	2.20496
08_MeOH-Water_2.00	-0.909445	64	-0.907	64			8	-5.09	-0.92388	1.01861	-0.91588								-0.908118	-0.914183	-0.909647	-0.909445	-0.909105								-0.00270152	0.000850812	-0.000925356		0.917978	0.916678	0.917328
09_MeNH2-MeOH_0.90	-2.8623	65	-2.814	65			9	-3.11	-2.88354	1.02471	-2.85754								-2.79096	-2.86316	-2.87569	-2.8623	-2.84929								-0.00750615	0.00891257	0.00070321		2.86458	2.85785	2.86121
09_MeNH2-MeOH_0.95	-3.07802	66	-3.041	66			9	-3.11	-3.11615	1.02471	-3.09115								-3.01827	-3.07871	-3.08925	-3.07802	-3.0671								-0.00671837	0.00779602	0.000538827		3.05962	3.05311	3.05637
09_MeNH2-MeOH_1.00	-3.06325	67	-3.035	67	-3.11	1.02471	9	-3.11	-3.11	1.02471	-3.087								-3.01332	-3.06401	-3.07265	-3.06325	-3.05411								-0.0060163	0.00689185	0.000437777		3.03521	3.02906	3.03214
09_MeNH2-MeOH_1.05	-2.91723	68	-2.896	68			9	-3.11	-2.96757	1.02471	-2.94657								-2.87558	-2.91819	-2.92507	-2.91723	-2.90959								-0.0053894	0.00612974	0.000370169		2.8865	2.88079	2.88365
09_MeNH2-MeOH_1.10	-2.70387	69	-2.687	69			9	-3.11	-2.7534	1.02471	-2.7334								-2.66915	-2.70507	-2.71041	-2.70387	-2.69749								-0.00484003	0.00546902	0.000314498		2.67454	2.66931	2.67193
09_MeNH2-MeOH_1.25	-1.98385	70	-1.976	70			9	-3.11	-2.02483	1.02471	-2.00883								-1.96364	-1.98563	-1.98766	-1.98385	-1.98013								-0.00355004	0.00383419	0.000142074		1.96688	1.96316	1.96502
09_MeNH2-MeOH_1.50	-1.10419	71	-1.1	71			9	-3.11	-1.12718	1.02471	-1.11818								-1.09547	-1.10642	-1.10584	-1.10419	-1.10258								-0.00251086	0.00190277	-0.000304043		1.10071	1.09912	1.09992
09_MeNH2-MeOH_2.00	-0.39645	72	-0.393	72			9	-3.11	-0.402712	1.02471	-0.398712								-0.394344	-0.399485	-0.396848	-0.39645	-0.39606								-0.00147088	0.000530589	-0.000470146		0.397757	0.397978	0.397868
10_MeNH2-MeNH2_0.90	-3.72444	73	-3.696	73			10	-4.22	-3.75653	1.01638	-3.72353								-3.62591	-3.72151	-3.74479	-3.72444	-3.71161								-0.00855159	0.00980917	0.000628794		3.95903	3.95472	3.95688
10_MeNH2-MeNH2_0.95	-4.11268	74	-4.093	74			10	-4.22	-4.16003	1.01638	-4.12803								-4.02939	-4.10944	-4.12992	-4.11268	-4.1018								-0.00739021	0.00874393	0.00067686		4.27522	4.27071	4.27297
10_MeNH2-MeNH2_1.00	-4.16466	75	-4.152	75	-4.22	1.01638	10	-4.22	-4.22	1.01638	-4.189								-4.09437	-4.16133	-4.17924	-4.16466	-4.15545								-0.00635682	0.00787343	0.000758309		4.27724	4.27273	4.27498
10_MeNH2-MeNH2_1.05	-4.01591	76	-4.008	76			10	-4.22	-4.07364	1.01638	-4.04464								-3.95669	-4.0126	-4.02821	-4.01591	-4.00812								-0.0054712	0.007127	0.0008279		4.09431	4.08994	4.09212
10_MeNH2-MeNH2_1.10	-3.75635	77	-3.752	77			10	-4.22	-3.81345	1.01638	-3.78545								-3.70649	-3.75314	-3.76671	-3.75635	-3.74977								-0.0047292	0.00646216	0.00086648		3.81185	3.80768	3.80976
10_MeNH2-MeNH2_1.25	-2.79299	78	-2.793	78			10	-4.22	-2.83874	1.01638	-2.81874								-2.76323	-2.79025	-2.79918	-2.79299	-2.78903								-0.00313438	0.00476472	0.000815169		2.81772	2.81427	2.816
10_MeNH2-MeNH2_1.50	-1.30885	79	-1.307	79			10	-4.22	-1.32841	1.01638	-1.31541								-1.29828	-1.30699	-1.31105	-1.30885	-1.30743								-0.00197101	0.00214594	8.74642e-05		1.32264	1.32094	1.32179
10_MeNH2-MeNH2_2.00	-0.38974	80	-0.387	80			10	-4.22	-0.393338	1.01638	-0.384338								-0.38756	-0.388903	-0.390195	-0.38974	-0.389446								-0.00100991	0.000375972	-0.00031697		0.39724	0.396741	0.39699
11_MeNH2-Peptide_0.90	-5.00913	81	-4.949	81			11	-5.48	-5.01674	1.01369	-4.96074								-4.87865	-4.99228	-5.03227	-5.00913	-4.98726								-0.0126987	0.0134889	0.0003951		5.19353	5.18086	5.1872
11_MeNH2-Peptide_0.95	-5.40909	82	-5.356	82			11	-5.48	-5.42932	1.01369	-5.37532								-5.29696	-5.39237	-5.429	-5.40909	-5.39027								-0.0113241	0.0122754	0.000475626		5.52757	5.51525	5.52141
11_MeNH2-Peptide_1.00	-5.45281	83	-5.406	83	-5.48	1.01369	11	-5.48	-5.48	1.01369	-5.429								-5.35656	-5.4365	-5.46992	-5.45281	-5.43662								-0.0100088	0.0113054	0.000648275		5.52515	5.51329	5.51922
11_MeNH2-Peptide_1.05	-5.27745	84	-5.236	84			11	-5.48	-5.30767	1.01369	-5.26067								-5.19494	-5.26172	-5.29212	-5.27745	-5.26355								-0.00877723	0.0104721	0.000847452		5.31819	5.30684	5.31252
11_MeNH2-Peptide_1.10	-4.97585	85	-4.939	85			11	-5.48	-5.00661	1.01369	-4.96261								-4.9052	-4.96078	-4.98843	-4.97585	-4.96393								-0.0076622	0.00970462	0.00102121		4.99567	4.98485	4.99026
11_MeNH2-Peptide_1.25	-3.2298	86	-3.209	86			11	-5.48	-3.25293	1.01369	-3.22193								-3.19569	-3.21749	-3.23587	-3.2298	-3.224								-0.00405812	0.00643813	0.00119		3.21989	3.21191	3.2159
11_MeNH2-Peptide_1.50	-1.41274	87	-1.401	87			11	-5.48	-1.42018	1.01369	-1.40518								-1.40187	-1.40324	-1.41467	-1.41274	-1.41088								-0.00155317	0.00293194	0.000689385		1.40416	1.40072	1.40244
11_MeNH2-Peptide_2.00	-0.460212	88	-0.455	88			11	-5.48	-0.461228	1.01369	-0.454228								-0.458255	-0.453314	-0.460561	-0.460212	-0.459877								-0.00108011	0.000428817	-0.000325646		0.45706	0.456276	0.456668
12_MeNH2-Water_0.90	-6.83393	89	-6.747	89			12	-7.4	-6.89135	1.02139	-6.85535								-6.74328	-6.85522	-6.84937	-6.83393	-6.81547								-0.00969081	0.0125164	0.00141281		7.1698	7.16289	7.16635
12_MeNH2-Water_0.95	-7.27212	90	-7.203	90			12	-7.4	-7.3571	1.02139	-7.3231								-7.19278	-7.29187	-7.28568	-7.27212	-7.25598								-0.00949277	0.0104002	0.000453723		7.52502	7.51814	7.52158
12_MeNH2-Water_1.00	-7.29992	91	-7.245	91	-7.4	1.02139	12	-7.4	-7.4	1.02139	-7.368								-7.23091	-7.31854	-7.31174	-7.29992	-7.28589								-0.00900771	0.00872921	-0.000139252		7.49049	7.48358	7.48703
12_MeNH2-Water_1.05	-7.07008	92	-7.029	92			12	-7.4	-7.17938	1.02139	-7.14938								-7.0104	-7.0879	-7.08032	-7.07008	-7.05795								-0.00831375	0.0074157	-0.000449028		7.21479	7.20784	7.21131
12_MeNH2-Water_1.10	-6.68838	93	-6.657	93			12	-7.4	-6.79942	1.02139	-6.77242								-6.63702	-6.70563	-6.6972	-6.68838	-6.67793								-0.00751651	0.00639523	-0.000560642		6.80006	6.79312	6.79659
12_MeNH2-Water_1.25	-5.23424	94	-5.222	94			12	-7.4	-5.33372	1.02139	-5.31172								-5.2022	-5.25055	-5.23976	-5.23424	-5.22771								-0.00511472	0.00450806	-0.00030333		5.29436	5.28793	5.29115
12_MeNH2-Water_1.50	-3.15783	95	-3.153	95			12	-7.4	-3.22046	1.02139	-3.20246								-3.14385	-3.17372	-3.16024	-3.15783	-3.15497								-0.0027221	0.00280912	4.35132e-05		3.19559	3.19112	3.19335
12_MeNH2-Water_2.00	-1.19853	96	-1.195	96			12	-7.4	-1.22057	1.02139	-1.21057								-1.19573	-1.21446	-1.19902	-1.19853	-1.19796								-0.00177229	0.00075601	-0.000508139		1.22168	1.2207	1.22119
13_Peptide-MeOH_0.90	-5.81102	97	-5.673	97			13	-6.28	-5.7648	1.01618	-5.6898								-5.70306	-5.81176	-5.82894	-5.81102	-5.78981								-0.00880889	0.0124823	0.0018367		5.95418	5.94615	5.95016
13_Peptide-MeOH_0.95	-6.22383	98	-6.107	98			13	-6.28	-6.20582	1.01618	-6.13782								-6.13084	-6.22571	-6.23928	-6.22383	-6.20552								-0.00787053	0.0108928	0.00151113		6.30864	6.30033	6.30449
13_Peptide-MeOH_1.00	-6.27817	99	-6.18	99	-6.28	1.01618	13	-6.28	-6.28	1.01618	-6.219								-6.19831	-6.28143	-6.29145	-6.27817	-6.26242								-0.00693896	0.00962668	0.00134386		6.32441	6.31601	6.32021
13_Peptide-MeOH_1.05	-6.1095	100	-6.027	100			13	-6.28	-6.12452	1.01618	-6.06852								-6.04109	-6.11425	-6.12088	-6.1095	-6.09599								-0.00610262	0.00860072	0.00124905		6.13143	6.12316	6.12729
13_Peptide-MeOH_1.10	-5.81023	101	-5.741	101			13	-6.28	-5.8339	1.01618	-5.7839								-5.75175	-5.81647	-5.81997	-5.81023	-5.79866								-0.00536217	0.00774574	0.00119179		5.81791	5.80989	5.8139
13_Peptide-MeOH_1.25	-4.6463	102	-4.604	102			13	-6.28	-4.6785	1.01618	-4.6405								-4.61003	-4.65627	-4.65235	-4.6463	-4.6391								-0.00370792	0.00579608	0.00104408		4.64217	4.63525	4.63871
13_Peptide-MeOH_1.50	-2.96981	103	-2.946	103			13	-6.28	-2.99367	1.01618	-2.97167								-2.95331	-2.98293	-2.97256	-2.96981	-2.96652								-0.00215687	0.00359144	0.000717281		2.97077	2.96591	2.96834
13_Peptide-MeOH_2.00	-1.31493	104	-1.303	104			13	-6.28	-1.32408	1.01618	-1.31508								-1.31154	-1.33073	-1.31549	-1.31493	-1.31425								-0.000813061	0.00134982	0.000268379		1.32052	1.31831	1.31941
14_Peptide-MeNH2_0.90	-6.93822	105	-6.812	105			14	-7.56	-6.91165	1.01463	-6.83865								-6.80096	-6.91787	-6.96244	-6.93822	-6.91527								-0.0122214	0.0117055	-0.000257985		7.25358	7.24994	7.25176
14_Peptide-MeNH2_0.95	-7.44608	106	-7.341	106			14	-7.56	-7.44839	1.01463	-7.38139								-7.32605	-7.42633	-7.46731	-7.44608	-7.42598								-0.0114036	0.0101204	-0.000641593		7.66258	7.6585	7.66054
14_Peptide-MeNH2_1.00	-7.53646	107	-7.451	107	-7.56	1.01463	14	-7.56	-7.56	1.01463	-7.498								-7.43183	-7.51759	-7.55499	-7.53646	-7.51891								-0.0105026	0.0088426	-0.000829999		7.68163	7.67716	7.67939
14_Peptide-MeNH2_1.05	-7.35958	108	-7.291	108			14	-7.56	-7.39766	1.01463	-7.33966								-7.2687	-7.34177	-7.3757	-7.35958	-7.34431								-0.00959855	0.00780798	-0.000895283		7.45446	7.44974	7.4521
14_Peptide-MeNH2_1.10	-7.0205	109	-6.966	109			14	-7.56	-7.0679	1.01463	-7.0139								-6.94174	-7.00378	-7.03448	-7.0205	-7.00724								-0.00872827	0.00698976	-0.000869256		7.08084	7.07609	7.07846
14_Peptide-MeNH2_1.25	-5.63893	110	-5.611	110			14	-7.56	-5.69308	1.01463	-5.64908								-5.58819	-5.62514	-5.64795	-5.63893	-5.63035								-0.00654723	0.00517631	-0.000685458		5.65202	5.64762	5.64982
14_Peptide-MeNH2_1.50	-3.56734	111	-3.553	111			14	-7.56	-3.60498	1.01463	-3.57698								-3.54309	-3.55662	-3.57165	-3.56734	-3.56321								-0.00447012	0.00318735	-0.000641385		3.57138	3.56818	3.56978
14_Peptide-MeNH2_2.00	-1.49832	112	-1.489	112			14	-7.56	-1.51078	1.01463	-1.49678								-1.49233	-1.49059	-1.49939	-1.49832	-1.4973								-0.00264984	0.00106669	-0.000791575		1.50828	1.50681	1.50755
15_Peptide-Peptide_0.90	-8.20422	113	-8.015	113			15	-8.72	-8.10422	1.01113	-8.02622								-8.05514	-8.18136	-8.22875	-8.20422	-8.1769								-0.0157151	0.0149902	-0.000362449		8.22488	8.20982	8.21735
15_Peptide-Peptide_0.95	-8.69565	114	-8.531	114			15	-8.72	-8.62596	1.01113	-8.55296								-8.56407	-8.67356	-8.71731	-8.69565	-8.67151								-0.0144085	0.0132379	-0.000585287		8.6565	8.64111	8.64881
15_Peptide-Peptide_1.00	-8.76729	115	-8.624	115	-8.72	1.01113	15	-8.72	-8.72	1.01113	-8.653								-8.6515	-8.74639	-8.78637	-8.76729	-8.74602								-0.0130015	0.0119182	-0.000541693		8.68903	8.67368	8.68135
15_Peptide-Peptide_1.05	-8.56864	116	-8.445	116			15	-8.72	-8.53901	1.01113	-8.47701								-8.46702	-8.54919	-8.5854	-8.56864	-8.54994								-0.0115952	0.010864	-0.000365569		8.46729	8.45204	8.45966
15_Peptide-Peptide_1.10	-8.20436	117	-8.098	117			15	-8.72	-8.18814	1.01113	-8.13214								-8.11536	-8.18647	-8.21905	-8.20436	-8.18796								-0.0102845	0.00998698	-0.000148775		8.09158	8.07654	8.08406
15_Peptide-Peptide_1.25	-6.72825	118	-6.657	118			15	-8.72	-6.7311	1.01113	-6.6901								-6.6689	-6.71465	-6.73806	-6.72825	-6.71728								-0.00639836	0.00848117	0.00104141		6.61885	6.60496	6.6119
15_Peptide-Peptide_1.50	-4.45655	119	-4.415	119			15	-8.72	-4.46415	1.01113	-4.43915								-4.42638	-4.44749	-4.46154	-4.45655	-4.45095								-0.00333712	0.00572502	0.00119395		4.38376	4.37345	4.37861
15_Peptide-Peptide_2.00	-1.7925	120	-1.774	120			15	-8.72	-1.79375	1.01113	-1.79375								-1.78606	-1.78903	-1.79357	-1.7925	-1.7913								-0.00112421	0.00199859	0.000437192		1.76732	1.76423	1.76578
16_Peptide-Water_0.90	-4.80144	121	-4.695	121			16	-5.2	-4.77022	1.01602	-4.72622								-4.73086	-4.82934	-4.81236	-4.80144	-4.78652								-0.0119271	0.00814997	-0.00188856		4.80717	4.79666	4.80192
16_Peptide-Water_0.95	-5.15	122	-5.061	122			16	-5.2	-5.14209	1.01602	-5.10209								-5.09012	-5.17845	-5.15927	-5.15	-5.13733								-0.0112033	0.00693209	-0.00213561		5.12525	5.11489	5.12007
16_Peptide-Water_1.00	-5.19092	123	-5.118	123	-5.2	1.01602	16	-5.2	-5.2	1.01602	-5.162								-5.14031	-5.22023	-5.19877	-5.19092	-5.1802								-0.0105536	0.00597836	-0.00228764		5.14988	5.1399	5.14489
16_Peptide-Water_1.05	-5.04427	124	-4.983	124			16	-5.2	-5.06284	1.01602	-5.02784								-5.00164	-5.07457	-5.05089	-5.04427	-5.03523								-0.00999841	0.00523135	-0.00238353		4.99641	4.987	4.9917
16_Peptide-Water_1.10	-4.79049	125	-4.74	125			16	-5.2	-4.81594	1.01602	-4.78494								-4.75467	-4.82179	-4.79606	-4.79049	-4.78289								-0.00948713	0.00463852	-0.00242431		4.74181	4.73304	4.73742
16_Peptide-Water_1.25	-3.82538	126	-3.793	126			16	-5.2	-3.85377	1.01602	-3.82877								-3.80431	-3.85907	-3.82866	-3.82538	-3.8209								-0.00811169	0.00338177	-0.00236496		3.78874	3.78185	3.78529
16_Peptide-Water_1.50	-2.46807	127	-2.449	127			16	-5.2	-2.48824	1.01602	-2.47324								-2.45931	-2.50351	-2.46944	-2.46807	-2.46621								-0.00630575	0.00202895	-0.0021384		2.45257	2.44809	2.45033
16_Peptide-Water_2.00	-1.13891	128	-1.133	128			16	-5.2	-1.15115	1.01602	-1.14515								-1.13781	-1.17577	-1.13908	-1.13891	-1.13867								-0.00376944	0.00083364	-0.0014679		1.13926	1.13744	1.13835
17_Uracil-Uracil_BP_0.90	-16.2292	129	-15.7	129			17	-17.45	-15.9449	1.0156	-15.7809								-15.9915	-16.2061	-16.2584	-16.2292	-16.1756								-0.0226247	0.0252341	0.00130473		16.055	16.0166	16.0358
17_Uracil-Uracil_BP_0.95	-17.3585	130	-16.898	130			17	-17.45	-17.1616	1.0156	-17.0076								-17.1463	-17.3327	-17.3846	-17.3585	-17.3107								-0.0217387	0.0215012	-0.000118751		17.0774	17.0392	17.0583
17_Uracil-Uracil_BP_1.00	-17.583	131	-17.182	131	-17.45	1.0156	17	-17.45	-17.45	1.0156	-17.302								-17.3946	-17.5557	-17.6063	-17.583	-17.5406								-0.0201467	0.0187897	-0.000678538		17.2309	17.193	17.212
17_Uracil-Uracil_BP_1.05	-17.2136	132	-16.864	132			17	-17.45	-17.127	1.0156	-16.986								-17.047	-17.1858	-17.2342	-17.2136	-17.1761								-0.018099	0.0166111	-0.000743958		16.8212	16.783	16.8021
17_Uracil-Uracil_BP_1.10	-16.4732	133	-16.169	133			17	-17.45	-16.4212	1.0156	-16.2912								-16.3264	-16.446	-16.4913	-16.4732	-16.4401								-0.0158655	0.0152526	-0.000306457		16.0633	16.026	16.0447
17_Uracil-Uracil_BP_1.25	-13.3496	134	-13.15	134			17	-17.45	-13.3551	1.0156	-13.2511								-13.2509	-13.327	-13.3618	-13.3496	-13.3274								-0.00952479	0.0128365	0.00165584		12.9722	12.9383	12.9552
17_Uracil-Uracil_BP_1.50	-8.46175	135	-8.354	135			17	-17.45	-8.4843	1.0156	-8.4083								-8.41144	-8.44637	-8.46798	-8.46175	-8.45037								-0.00237042	0.0101926	0.0039111		8.21119	8.18436	8.19777
17_Uracil-Uracil_BP_2.00	-3.38004	136	-3.333	136			17	-17.45	-3.38499	1.0156	-3.34599								-3.36525	-3.37145	-3.38187	-3.38004	-3.37669								0.000289334	0.00485933	0.00257433		3.27543	3.26485	3.27014
18_Water-Pyridine_0.90	-6.52673	137	-6.392	137			18	-6.97	-6.5192	1.0199	-6.4222								-6.43643	-6.61529	-6.53999	-6.52673	-6.51133								-0.0140539	0.0118005	-0.0011267		6.74436	6.74077	6.74257
18_Water-Pyridine_0.95	-6.91751	138	-6.804	138			18	-6.97	-6.9394	1.0199	-6.8504								-6.83826	-7.00687	-6.92916	-6.91751	-6.90399								-0.0132136	0.0101944	-0.00150961		7.07037	7.06663	7.0685
18_Water-Pyridine_1.00	-6.92808	139	-6.834	139	-6.97	1.0199	18	-6.97	-6.97	1.0199	-6.89								-6.85901	-7.01875	-6.93825	-6.92808	-6.91628								-0.0121668	0.00891336	-0.00162673		7.03456	7.03064	7.0326
18_Water-Pyridine_1.05	-6.70133	140	-6.624	140			18	-6.97	-6.75582	1.0199	-6.68382								-6.6415	-6.79359	-6.71015	-6.70133	-6.69109								-0.0110283	0.00787617	-0.00157607		6.7758	6.77171	6.77376
18_Water-Pyridine_1.10	-6.33583	141	-6.273	141			18	-6.97	-6.39784	1.0199	-6.33284								-6.28426	-6.42978	-6.34344	-6.33583	-6.327								-0.00988007	0.00703489	-0.00142259		6.38921	6.38503	6.38712
18_Water-Pyridine_1.25	-4.96488	142	-4.931	142			18	-6.97	-5.02913	1.0199	-4.97713								-4.93255	-5.06319	-4.96967	-4.96488	-4.95932								-0.0066614	0.00527834	-0.00069153		4.99298	4.98885	4.99091
18_Water-Pyridine_1.50	-3.02649	143	-3.011	143			18	-6.97	-3.07092	1.0199	-3.03492								-3.01199	-3.12879	-3.02863	-3.02649	-3.02398								-0.00348007	0.00333185	-7.41105e-05		3.05185	3.049	3.05042
18_Water-Pyridine_2.00	-1.19491	144	-1.186	144			18	-6.97	-1.2096	1.0199	-1.1916								-1.19172	-1.30018	-1.19538	-1.19491	-1.19436								-0.00159912	0.00111451	-0.000242308		1.21519	1.21501	1.2151
19_MeOH-Pyridine_0.90	-6.94443	145	-6.783	145			19	-7.51	-6.88011	1.01432	-6.77511								-6.82581	-7.00499	-6.96328	-6.94443	-6.92536								-0.00997685	0.0129611	0.00149212		7.248	7.24235	7.24517
19_MeOH-Pyridine_0.95	-7.44547	146	-7.307	146			19	-7.51	-7.41161	1.01432	-7.31361								-7.34064	-7.50748	-7.46216	-7.44547	-7.4286								-0.00901085	0.0112938	0.00114146		7.66219	7.65623	7.65921
19_MeOH-Pyridine_1.00	-7.52025	147	-7.404	147	-7.51	1.01432	19	-7.51	-7.51	1.01432	-7.421								-7.42812	-7.58413	-7.53494	-7.52025	-7.5054								-0.00786766	0.00996926	0.0010508		7.67268	7.66638	7.66953
19_MeOH-Pyridine_1.05	-7.32365	148	-7.226	148			19	-7.51	-7.32945	1.01432	-7.24745								-7.24311	-7.38965	-7.33651	-7.32365	-7.31064								-0.00666562	0.00890029	0.00111734		7.42995	7.42338	7.42666
19_MeOH-Pyridine_1.10	-6.96348	149	-6.882	149			19	-7.51	-6.98053	1.01432	-6.90553								-6.89335	-7.03167	-6.97469	-6.96348	-6.95213								-0.00550639	0.00803484	0.00126422		7.0379	7.03119	7.03454
19_MeOH-Pyridine_1.25	-5.52459	150	-5.479	150			19	-7.51	-5.55744	1.01432	-5.49844								-5.47908	-5.59864	-5.53188	-5.52459	-5.51718								-0.00251934	0.0062325	0.00185658		5.55633	5.54976	5.55304
19_MeOH-Pyridine_1.50	-3.40319	151	-3.381	151			19	-7.51	-3.4294	1.01432	-3.3884								-3.38139	-3.48305	-3.40668	-3.40319	-3.39962								-0.000202277	0.00425172	0.00202472		3.42698	3.42221	3.4246
19_MeOH-Pyridine_2.00	-1.34347	152	-1.331	152			19	-7.51	-1.35006	1.01432	-1.33106								-1.33783	-1.42813	-1.34437	-1.34347	-1.34254								-8.62784e-05	0.00164316	0.000778439		1.36486	1.3636	1.36423
20_AcOH-AcOH_0.90	-17.9699	153	-17.449	153			20	-19.41	-17.7415	1.01676	-17.7015								-17.7819	-17.995	-17.9953	-17.9699	-17.9226								-0.0193613	0.0278096	0.00422418		17.688	17.6543	17.6711
20_AcOH-AcOH_0.95	-19.2277	154	-18.787	154			20	-19.41	-19.1019	1.01676	-19.0559								-19.055	-19.2462	-19.2512	-19.2277	-19.1844								-0.0201769	0.0227558	0.00128949		18.8802	18.8467	18.8634
20_AcOH-AcOH_1.00	-19.4687	155	-19.09	155	-19.41	1.01676	20	-19.41	-19.41	1.01676	-19.371								-19.3117	-19.4813	-19.49	-19.4687	-19.4294								-0.0199238	0.019012	-0.000455921		19.0752	19.0419	19.0585
20_AcOH-AcOH_1.05	-19.0493	156	-18.724	156			20	-19.41	-19.0379	1.01676	-19.0009								-18.9081	-19.0572	-19.0685	-19.0493	-19.014								-0.0192001	0.0158686	-0.00166576		18.6291	18.596	18.6125
20_AcOH-AcOH_1.10	-18.2195	157	-17.938	157			20	-19.41	-18.2387	1.01676	-18.2027								-18.0936	-18.224	-18.2366	-18.2195	-18.188								-0.0176231	0.0137114	-0.00195585		17.7903	17.7572	17.7738
20_AcOH-AcOH_1.25	-14.7358	158	-14.558	158			20	-19.41	-14.802	1.01676	-14.771								-14.6504	-14.7361	-14.7475	-14.7358	-14.7145								-0.0116849	0.0101161	-0.000784416		14.3516	14.3195	14.3355
20_AcOH-AcOH_1.50	-9.2885	159	-9.207	159			20	-19.41	-9.36133	1.01676	-9.34533								-9.24754	-9.28839	-9.29409	-9.2885	-9.27825								-0.00383031	0.00824525	0.00220747		9.04508	9.0185	9.03179
20_AcOH-AcOH_2.00	-3.61056	160	-3.592	160			20	-19.41	-3.65221	1.01676	-3.64321								-3.60229	-3.60963	-3.61169	-3.61056	-3.60849								-0.000711551	0.00387065	0.00157955		3.52209	3.51237	3.51723
21_AcNH2-AcNH2_0.90	-15.3351	161	-14.926	161			21	-16.52	-15.1647	1.01599	-15.1607								-15.1564	-15.3428	-15.3622	-15.3351	-15.298								-0.0206608	0.0217742	0.000556684		15.0571	15.0214	15.0392
21_AcNH2-AcNH2_0.95	-16.375	162	-16.026	162			21	-16.52	-16.2823	1.01599	-16.2813								-16.2171	-16.3788	-16.399	-16.375	-16.3423								-0.019745	0.0181705	-0.000787255		16.0313	15.9954	16.0134
21_AcNH2-AcNH2_1.00	-16.5588	163	-16.26	163	-16.52	1.01599	21	-16.52	-16.52	1.01599	-16.52								-16.4202	-16.5597	-16.5798	-16.5588	-16.53								-0.0179706	0.0156991	-0.00113576		16.1784	16.1425	16.1605
21_AcNH2-AcNH2_1.05	-16.1883	164	-15.935	164			21	-16.52	-16.1898	1.01599	-16.1908								-16.0676	-16.1876	-16.2066	-16.1883	-16.1633								-0.0158368	0.0139227	-0.000957046		15.7949	15.7591	15.777
21_AcNH2-AcNH2_1.10	-15.4764	165	-15.262	165			21	-16.52	-15.506	1.01599	-15.474								-15.3718	-15.4749	-15.4923	-15.4764	-15.4547								-0.0136261	0.0126596	-0.000483263		15.0875	15.0523	15.0699
21_AcNH2-AcNH2_1.25	-12.5444	166	-12.418	166			21	-16.52	-12.6166	1.01599	-12.5916								-12.4783	-12.5431	-12.5545	-12.5444	-12.5307								-0.00768491	0.0106256	0.00147035		12.2225	12.1912	12.2068
21_AcNH2-AcNH2_1.50	-8.05386	167	-7.997	167			21	-16.52	-8.12487	1.01599	-8.09887								-8.02466	-8.053	-8.05831	-8.05386	-8.04778								-0.00110292	0.00840376	0.00365042		7.8623	7.83917	7.85074
21_AcNH2-AcNH2_2.00	-3.01978	168	-2.999	168			21	-16.52	-3.04695	1.01599	-3.03595								-3.01594	-3.01874	-3.02037	-3.01978	-3.01898								0.000434984	0.00330931	0.00187215		2.95615	2.95101	2.95358
22_AcOH-Uracil_0.90	-18.421	169	-17.902	169			22	-19.78	-18.1674	1.01483	-18.0624								-18.2163	-18.4459	-18.4471	-18.421	-18.3729								-0.0217922	0.0260474	0.0021276		18.1718	18.1376	18.1547
22_AcOH-Uracil_0.95	-19.6319	170	-19.185	170			22	-19.78	-19.4695	1.01483	-19.3755								-19.4472	-19.652	-19.6555	-19.6319	-19.5886								-0.0216123	0.021847	0.000117386		19.2915	19.2573	19.2744
22_AcOH-Uracil_1.00	-19.8775	171	-19.491	171	-19.78	1.01483	22	-19.78	-19.78	1.01483	-19.693								-19.7121	-19.8936	-19.8987	-19.8775	-19.8387								-0.0207245	0.0187035	-0.00101048		19.4737	19.4398	19.4567
22_AcOH-Uracil_1.05	-19.4881	172	-19.152	172			22	-19.78	-19.436	1.01483	-19.352								-19.3411	-19.5013	-19.5069	-19.4881	-19.4536								-0.0192165	0.0163407	-0.00143788		19.0462	19.0126	19.0294
22_AcOH-Uracil_1.10	-18.6975	173	-18.406	173			22	-19.78	-18.6789	1.01483	-18.5999								-18.5679	-18.7092	-18.7141	-18.6975	-18.6671								-0.0172667	0.0145528	-0.00135691		18.2394	18.2059	18.2227
22_AcOH-Uracil_1.25	-15.3249	174	-15.137	174			22	-19.78	-15.3614	1.01483	-15.2984								-15.2389	-15.3365	-15.3359	-15.3249	-15.3047								-0.010902	0.0116574	0.000377666		14.9008	14.8686	14.8847
22_AcOH-Uracil_1.50	-9.95316	175	-9.859	175			22	-19.78	-10.0052	1.01483	-9.96118								-9.91305	-9.9681	-9.95831	-9.95316	-9.94374								-0.00294913	0.00974995	0.00340041		9.66431	9.63787	9.65109
22_AcOH-Uracil_2.00	-4.17934	176	-4.146	176			22	-19.78	-4.20747	1.01483	-4.18547								-4.17207	-4.19646	-4.18027	-4.17934	-4.17763								0.000179495	0.00495891	0.0025692		4.0523	4.0419	4.0471
23_AcNH2-Uracil_0.90	-18.1824	177	-17.697	177			23	-19.47	-17.9552	1.01459	-17.8662								-17.982	-18.1822	-18.209	-18.1824	-18.1384								-0.0217827	0.0248537	0.0015355		17.9593	17.9247	17.942
23_AcNH2-Uracil_0.95	-19.3101	178	-18.889	178			23	-19.47	-19.1646	1.01459	-19.0846								-19.1314	-19.3065	-19.3339	-19.3101	-19.2709								-0.0208585	0.021268	0.000204714		18.9927	18.9578	18.9753
23_AcNH2-Uracil_1.00	-19.5567	179	-19.19	179	-19.47	1.01459	23	-19.47	-19.47	1.01459	-19.394								-19.3983	-19.5506	-19.5778	-19.5567	-19.522								-0.0193429	0.0185234	-0.000409738		19.1755	19.1404	19.1579
23_AcNH2-Uracil_1.05	-19.2169	180	-18.898	180			23	-19.47	-19.1737	1.01459	-19.1017								-19.0776	-19.2094	-19.2355	-19.2169	-19.1864								-0.0174232	0.0166137	-0.000404758		18.7977	18.7629	18.7803
23_AcNH2-Uracil_1.10	-18.501	181	-18.224	181			23	-19.47	-18.4899	1.01459	-18.4219								-18.3792	-18.493	-18.5173	-18.501	-18.4743								-0.0153504	0.0151431	-0.000103606		18.0654	18.0309	18.0482
23_AcNH2-Uracil_1.25	-15.3858	182	-15.208	182			23	-19.47	-15.4299	1.01459	-15.3749								-15.3069	-15.3794	-15.3964	-15.3858	-15.3685								-0.00915416	0.0126662	0.001756		14.9799	14.9476	14.9638
23_AcNH2-Uracil_1.50	-10.3196	183	-10.229	183			23	-19.47	-10.3783	1.01459	-10.3383								-10.2844	-10.3166	-10.3243	-10.3196	-10.3118								-0.00165807	0.0104399	0.00439089		10.0369	10.0108	10.0239
23_AcNH2-Uracil_2.00	-4.69061	184	-4.653	184			23	-19.47	-4.72089	1.01459	-4.70389								-4.68605	-4.68958	-4.69122	-4.69061	-4.6896								0.00136178	0.00547602	0.0034189		4.55804	4.54739	4.55272
24_Benzene-Benzene_pi-pi_0.90	-0.105376	185	-0.225	185			24	-2.72	-0.223684	0.994152	0.0333158								0.230306	0.0206283	-0.16083	-0.105376	-0.071481								-0.0380702	0.0317322	-0.00316899		3.94326	3.9523	3.94778
24_Benzene-Benzene_pi-pi_0.95	-2.01598	186	-2.069	186			24	-2.72	-2.0569	0.994152	-1.8259								-1.75048	-1.9087	-2.06015	-2.01598	-1.98873								-0.0318159	0.0300548	-0.000880553		4.93002	4.9377	4.93386
24_Benzene-Benzene_pi-pi_1.00	-2.72488	187	-2.736	187	-2.72	0.994152	24	-2.72	-2.72	0.994152	-2.517								-2.51381	-2.63407	-2.76017	-2.72488	-2.7029								-0.0268624	0.027657	0.000397342		4.954	4.96004	4.95702
24_Benzene-Benzene_pi-pi_1.05	-2.81335	188	-2.799	188			24	-2.72	-2.78263	0.994152	-2.60763								-2.6449	-2.73687	-2.84162	-2.81335	-2.79559								-0.0228932	0.0247179	0.000912354		4.531	4.5352	4.5331
24_Benzene-Benzene_pi-pi_1.10	-2.60708	189	-2.578	189			24	-2.72	-2.56292	0.994152	-2.41592								-2.4721	-2.54279	-2.6298	-2.60708	-2.5927								-0.0195327	0.0216017	0.00103453		3.94116	3.94329	3.94223
24_Benzene-Benzene_pi-pi_1.25	-1.57756	190	-1.538	190			24	-2.72	-1.52901	0.994152	-1.44901								-1.50764	-1.53956	-1.58939	-1.57756	-1.56994								-0.0116326	0.0132523	0.000809863		2.21415	2.21173	2.21294
24_Benzene-Benzene_pi-pi_1.50	-0.515145	191	-0.487	191			24	-2.72	-0.484152	0.994152	-0.442152								-0.489425	-0.497376	-0.519507	-0.515145	-0.51229								-0.00761994	0.00474909	-0.00143542		0.710244	0.710136	0.71019
24_Benzene-Benzene_pi-pi_2.00	-0.0718033	192	-0.063	192			24	-2.72	-0.0626316	0.994152	-0.0516316								-0.0662986	-0.0668402	-0.0727381	-0.0718033	-0.0711859								-0.00461046	0.000572407	-0.00201903		0.101924	0.102818	0.102371
25_Pyridine-Pyridine_pi-pi_0.90	-1.20095	193	-1.321	193			25	-3.8	-1.31237	0.993464	-1.06037								-0.852898	-1.08235	-1.25375	-1.20095	-1.158								-0.0327348	0.0334842	0.000374707		5.30179	5.31124	5.30651
25_Pyridine-Pyridine_pi-pi_0.95	-3.11051	194	-3.168	194			25	-3.8	-3.14729	0.993464	-2.91929								-2.83417	-3.00833	-3.15275	-3.11051	-3.07607								-0.0262128	0.0321568	0.00297202		6.26344	6.27129	6.26736
25_Pyridine-Pyridine_pi-pi_1.00	-3.80907	195	-3.825	195	-3.8	0.993464	25	-3.8	-3.8	0.993464	-3.603								-3.5887	-3.72134	-3.84293	-3.80907	-3.78135								-0.0214753	0.0299681	0.0042464		6.24942	6.25601	6.25271
25_Pyridine-Pyridine_pi-pi_1.05	-3.86521	196	-3.855	196			25	-3.8	-3.8298	0.993464	-3.6618								-3.6889	-3.79026	-3.89242	-3.86521	-3.84285								-0.0181387	0.0270266	0.00444395		5.7667	5.77203	5.76936
25_Pyridine-Pyridine_pi-pi_1.10	-3.60651	197	-3.58	197			25	-3.8	-3.5566	0.993464	-3.4146								-3.46499	-3.54279	-3.62841	-3.60651	-3.58843								-0.0156646	0.0237769	0.00405613		5.09925	5.10335	5.1013
25_Pyridine-Pyridine_pi-pi_1.25	-2.39647	198	-2.356	198			25	-3.8	-2.3406	0.993464	-2.2606								-2.32179	-2.35803	-2.40809	-2.39647	-2.38677								-0.0096761	0.0152293	0.00277659		3.15289	3.15329	3.15309
25_Pyridine-Pyridine_pi-pi_1.50	-0.990079	199	-0.96	199			25	-3.8	-0.953725	0.993464	-0.915725								-0.963329	-0.972892	-0.994255	-0.990079	-0.986556								-0.00567793	0.00585227	8.71713e-05		1.24597	1.24612	1.24604
25_Pyridine-Pyridine_pi-pi_2.00	-0.245614	200	-0.236	200			25	-3.8	-0.234458	0.993464	-0.222458								-0.240367	-0.241075	-0.246435	-0.245614	-0.244918								-0.00393716	0.00107565	-0.00143076		0.292621	0.294576	0.293599
26_Uracil-Uracil_pi-pi_0.90	-7.97577	201	-7.855	201			26	-9.75	-7.79821	0.992771	-7.29121								-7.50031	-7.85604	-8.0339	-7.97577	-7.87112								-0.0484237	0.0415994	-0.00341219		10.0473	10.0063	10.0268
26_Uracil-Uracil_pi-pi_0.95	-9.64006	202	-9.498	202			26	-9.75	-9.42934	0.992771	-8.96034								-9.24509	-9.53226	-9.68851	-9.64006	-9.55283								-0.0422536	0.0386999	-0.00177684		11.2083	11.1694	11.1888
26_Uracil-Uracil_pi-pi_1.00	-9.97639	203	-9.821	203	-9.75	0.992771	26	-9.75	-9.75	0.992771	-9.325								-9.64744	-9.87984	-10.0168	-9.97639	-9.9035								-0.0369903	0.0357768	-0.000606755		11.167	11.1302	11.1486
26_Uracil-Uracil_pi-pi_1.05	-9.58987	204	-9.429	204			26	-9.75	-9.36083	0.992771	-8.97983								-9.31542	-9.50382	-9.62367	-9.58987	-9.52888								-0.0326207	0.0327817	8.0533e-05		10.4967	10.462	10.4793
26_Uracil-Uracil_pi-pi_1.10	-8.84824	205	-8.685	205			26	-9.75	-8.62221	0.992771	-8.28421								-8.61882	-8.77189	-8.87655	-8.84824	-8.79713								-0.0289596	0.0298835	0.000461934		9.5418	9.50973	9.52577
26_Uracil-Uracil_pi-pi_1.25	-6.21709	206	-6.072	206			26	-9.75	-6.0281	0.992771	-5.8001								-6.08154	-6.16512	-6.23386	-6.21709	-6.1867								-0.0200838	0.0218882	0.000902204		6.54027	6.51446	6.52736
26_Uracil-Uracil_pi-pi_1.50	-3.19565	207	-3.096	207			26	-9.75	-3.07362	0.992771	-2.95262								-3.13549	-3.16782	-3.20311	-3.19565	-3.18208								-0.0114821	0.0114726	-4.77667e-06		3.29441	3.27787	3.28614
26_Uracil-Uracil_pi-pi_2.00	-1.03386	208	-0.992	208			26	-9.75	-0.984828	0.992771	-0.948828								-1.0172	-1.02378	-1.03593	-1.03386	-1.03009								-0.00628421	0.0022299	-0.00202715		1.03561	1.03007	1.03284
27_Benzene-Pyridine_pi-pi_0.90	-0.602151	209	-0.725	209			27	-3.34	-0.718759	0.991392	-0.466759								-0.255878	-0.479079	-0.656945	-0.602151	-0.563217								-0.035607	0.0323661	-0.00162046		4.58677	4.59531	4.59104
27_Benzene-Pyridine_pi-pi_0.95	-2.63579	210	-2.69	210			27	-3.34	-2.66684	0.991392	-2.43584								-2.36344	-2.53057	-2.67921	-2.63579	-2.60477								-0.0290122	0.0308555	0.000921645		5.65545	5.66259	5.65902
27_Benzene-Pyridine_pi-pi_1.00	-3.35795	211	-3.369	211	-3.34	0.991392	27	-3.34	-3.34	0.991392	-3.136								-3.14237	-3.26837	-3.39251	-3.35795	-3.33311								-0.0240871	0.0285373	0.0022251		5.66624	5.67202	5.66913
27_Benzene-Pyridine_pi-pi_1.05	-3.41398	212	-3.398	212			27	-3.34	-3.36875	0.991392	-3.19175								-3.24251	-3.33806	-3.44159	-3.41398	-3.39403								-0.0204193	0.0255697	0.00257518		5.1932	5.19748	5.19534
27_Benzene-Pyridine_pi-pi_1.10	-3.15867	213	-3.128	213			27	-3.34	-3.10107	0.991392	-2.95107								-3.02162	-3.09451	-3.18079	-3.15867	-3.14257								-0.0175355	0.0223677	0.00241611		4.54217	4.5449	4.54353
27_Benzene-Pyridine_pi-pi_1.25	-2.01249	214	-1.97	214			27	-3.34	-1.95304	0.991392	-1.86704								-1.94044	-1.97375	-2.02417	-2.01249	-2.00386								-0.0109165	0.0140069	0.00154519		2.69644	2.69537	2.6959
27_Benzene-Pyridine_pi-pi_1.50	-0.752017	215	-0.721	215			27	-3.34	-0.714794	0.991392	-0.669794								-0.725996	-0.734071	-0.756251	-0.752017	-0.748853								-0.00643478	0.00526503	-0.000584878		0.970818	0.970395	0.970606
27_Benzene-Pyridine_pi-pi_2.00	-0.155335	216	-0.145	216			27	-3.34	-0.143752	0.991392	-0.129752								-0.150027	-0.150333	-0.156201	-0.155335	-0.154684								-0.00392745	0.000946237	-0.00149061		0.191853	0.193149	0.192501
28_Benzene-Uracil_pi-pi_0.90	-3.49156	217	-3.531	217			28	-5.59	-3.45982	0.979842	-3.07582								-3.07225	-3.3896	-3.54961	-3.49156	-3.41775								-0.0457171	0.0380139	-0.00385161		6.69927	6.68302	6.69115
28_Benzene-Uracil_pi-pi_0.95	-5.22194	218	-5.216	218			28	-5.59	-5.11086	0.979842	-4.75686								-4.8804	-5.1368	-5.26946	-5.22194	-5.16142								-0.0393889	0.035613	-0.00188796		7.68909	7.67289	7.68099
28_Benzene-Uracil_pi-pi_1.00	-5.74119	219	-5.705	219	-5.59	0.979842	28	-5.59	-5.59	0.979842	-5.27								-5.46228	-5.67119	-5.78013	-5.74119	-5.69147								-0.0343251	0.0329227	-0.000701225		7.64625	7.63041	7.63833
28_Benzene-Uracil_pi-pi_1.05	-5.60411	220	-5.549	220			28	-5.59	-5.43714	0.979842	-5.15314								-5.37598	-5.54762	-5.63604	-5.60411	-5.56322								-0.030319	0.0299643	-0.000177318		7.0816	7.0663	7.07395
28_Benzene-Uracil_pi-pi_1.10	-5.14357	221	-5.077	221			28	-5.59	-4.97466	0.979842	-4.72566								-4.95663	-5.099	-5.16979	-5.14357	-5.1099								-0.026959	0.0269329	-1.30087e-05		6.29602	6.28135	6.28868
28_Benzene-Uracil_pi-pi_1.25	-3.36301	222	-3.292	222			28	-5.59	-3.22564	0.979842	-3.06564								-3.25869	-3.34582	-3.3777	-3.36301	-3.34402								-0.0179186	0.0186016	0.00034149		3.93334	3.91925	3.9263
28_Benzene-Uracil_pi-pi_1.50	-1.41237	223	-1.364	223			28	-5.59	-1.3365	0.979842	-1.2585								-1.36923	-1.41883	-1.41846	-1.41237	-1.40444								-0.00889331	0.00878325	-5.50303e-05		1.61234	1.60182	1.60708
28_Benzene-Uracil_pi-pi_2.00	-0.271054	224	-0.251	224			28	-5.59	-0.24594	0.979842	-0.22194								-0.260162	-0.293476	-0.272593	-0.271054	-0.269041								-0.00520258	0.0020081	-0.00159724		0.302045	0.30056	0.301303
29_Pyridine-Uracil_pi-pi_0.90	-3.67934	225	-3.74	225			29	-6.7	-3.67743	0.98327	-3.29743								-3.23892	-3.58193	-3.73813	-3.67934	-3.59871								-0.0406861	0.0414066	0.000360211		7.13389	7.11702	7.12545
29_Pyridine-Uracil_pi-pi_0.95	-6.17031	226	-6.173	226			29	-6.7	-6.06972	0.98327	-5.71972								-5.82539	-6.09133	-6.21663	-6.17031	-6.10673								-0.0331696	0.0384212	0.00262578		8.71006	8.693	8.70153
29_Pyridine-Uracil_pi-pi_1.00	-6.84711	227	-6.814	227	-6.7	0.98327	29	-6.7	-6.7	0.98327	-6.387								-6.57532	-6.78423	-6.88376	-6.84711	-6.79671								-0.0276462	0.0350266	0.00369021		8.73142	8.71479	8.72311
29_Pyridine-Uracil_pi-pi_1.05	-6.63673	228	-6.581	228			29	-6.7	-6.4709	0.98327	-6.1999								-6.42164	-6.58782	-6.66581	-6.63673	-6.59663								-0.0235987	0.0313037	0.00385252		8.04764	8.0319	8.03977
29_Pyridine-Uracil_pi-pi_1.10	-6.03884	229	-5.971	229			29	-6.7	-5.8711	0.98327	-5.6411								-5.86794	-6.00198	-6.06201	-6.03884	-6.00684								-0.0202178	0.0275796	0.00368091		7.10667	7.0916	7.09913
29_Pyridine-Uracil_pi-pi_1.25	-3.93693	230	-3.866	230			29	-6.7	-3.80132	0.98327	-3.66032								-3.84894	-3.92644	-3.9489	-3.93693	-3.92029								-0.0119874	0.0180556	0.00303413		4.43161	4.41827	4.42494
29_Pyridine-Uracil_pi-pi_1.50	-1.82447	231	-1.776	231			29	-6.7	-1.74629	0.98327	-1.67829								-1.79143	-1.83486	-1.82897	-1.82447	-1.81817								-0.00607064	0.00799276	0.00096106		1.98698	1.97929	1.98314
29_Pyridine-Uracil_pi-pi_2.00	-0.552071	232	-0.532	232			29	-6.7	-0.5231	0.98327	-0.5031								-0.545019	-0.576303	-0.553034	-0.552071	-0.550722								-0.00411751	0.00173679	-0.00119036		0.577307	0.577362	0.577334
30_Benzene-Ethene_0.90	-0.110963	233	-0.259	233			30	-1.36	-0.249462	0.963173	-0.129462								0.0650895	-0.0658846	-0.143312	-0.110963	-0.0945271								-0.00862468	0.0253621	0.00836873		1.9921	1.98945	1.99078
30_Benzene-Ethene_0.95	-1.02729	234	-1.125	234			30	-1.36	-1.08357	0.963173	-0.973569								-0.887886	-0.988442	-1.05303	-1.02729	-1.01414								-0.00463807	0.0245256	0.00994378		2.44304	2.43968	2.44136
30_Benzene-Ethene_1.00	-1.35041	235	-1.412	235	-1.36	0.963173	30	-1.36	-1.36	0.963173	-1.263								-1.2396	-1.31718	-1.37095	-1.35041	-1.33985								-0.0023099	0.0227147	0.0102024		2.42293	2.41919	2.42106
30_Benzene-Ethene_1.05	-1.36583	236	-1.401	236			30	-1.36	-1.34941	0.963173	-1.26541								-1.27749	-1.3377	-1.38225	-1.36583	-1.35735								-0.0012555	0.0202181	0.00948129		2.18365	2.17964	2.18164
30_Benzene-Ethene_1.10	-1.23689	237	-1.256	237			30	-1.36	-1.20975	0.963173	-1.13975								-1.16621	-1.21329	-1.25006	-1.23689	-1.23005								-0.00102372	0.0174036	0.00818993		1.8648	1.8607	1.86275
30_Benzene-Ethene_1.25	-0.69203	238	-0.689	238			30	-1.36	-0.663626	0.963173	-0.629626								-0.654817	-0.678193	-0.69898	-0.69203	-0.688364								-0.00163716	0.0102875	0.00432518		0.986082	0.982765	0.984423
30_Benzene-Ethene_1.50	-0.182771	239	-0.174	239			30	-1.36	-0.167592	0.963173	-0.153592								-0.168002	-0.176158	-0.185534	-0.182771	-0.181298								-0.00278555	0.00435992	0.000787185		0.271272	0.271051	0.271162
30_Benzene-Ethene_2.00	0.00645559	240	0.009	240			30	-1.36	0.00866856	0.963173	0.0126686								0.00968555	0.00703007	0.00585075	0.00645559	0.0067808								-0.00284938	0.000577463	-0.00113596		0.00433341	0.00568733	0.00501037
31_Uracil-Ethene_0.90	-2.51916	241	-2.567	241			31	-3.33	-2.53052	0.98579	-2.34652								-2.32547	-2.45783	-2.54678	-2.51916	-2.48129								-0.0148619	0.0247606	0.00494933		3.63929	3.62777	3.63353
31_Uracil-Ethene_0.95	-3.2089	242	-3.237	242			31	-3.33	-3.191	0.98579	-3.023								-3.05114	-3.15399	-3.23146	-3.2089	-3.17795								-0.0110495	0.0234946	0.00622257		4.0626	4.0516	4.0571
31_Uracil-Ethene_1.00	-3.36541	243	-3.378	243	-3.33	0.98579	31	-3.33	-3.33	0.98579	-3.18								-3.23682	-3.3163	-3.38385	-3.36541	-3.34011								-0.00816436	0.0218447	0.00684016		4.02068	4.01005	4.01536
31_Uracil-Ethene_1.05	-3.23506	244	-3.237	244			31	-3.33	-3.191	0.98579	-3.057								-3.13016	-3.19104	-3.25012	-3.23506	-3.21436								-0.00611658	0.01989	0.00688673		3.74118	3.73087	3.73603
31_Uracil-Ethene_1.10	-2.96582	245	-2.959	245			31	-3.33	-2.91695	0.98579	-2.79895								-2.88012	-2.92618	-2.97813	-2.96582	-2.94886								-0.00474567	0.0177879	0.00652113		3.3592	3.34923	3.35421
31_Uracil-Ethene_1.25	-2.00895	246	-1.99	246			31	-3.33	-1.96172	0.98579	-1.88372								-1.96158	-1.9788	-2.01578	-2.00895	-1.99954								-0.00310392	0.0118716	0.00438383		2.19937	2.19088	2.19513
31_Uracil-Ethene_1.50	-0.951385	247	-0.932	247			31	-3.33	-0.918757	0.98579	-0.880757								-0.932103	-0.928852	-0.954164	-0.951385	-0.947535								-0.00302629	0.00558325	0.00127848		1.01073	1.00606	1.00839
31_Uracil-Ethene_2.00	-0.261729	248	-0.254	248			31	-3.33	-0.250391	0.98579	-0.241391								-0.257383	-0.244916	-0.262356	-0.261729	-0.260859								-0.00303967	0.00111708	-0.000961296		0.26662	0.266958	0.266789
32_Uracil-Ethyne_0.90	-2.70836	249	-2.793	249			32	-3.69	-2.75787	0.987423	-2.61187								-2.53145	-2.68934	-2.73155	-2.70836	-2.67308								-0.0361502	0.0263315	-0.00490937		3.98218	3.98107	3.98163
32_Uracil-Ethyne_0.95	-3.50744	250	-3.563	250			32	-3.69	-3.51819	0.987423	-3.38219								-3.36436	-3.49318	-3.52625	-3.50744	-3.47884								-0.031914	0.0248652	-0.00352438		4.46176	4.46033	4.46105
32_Uracil-Ethyne_1.00	-3.70204	251	-3.737	251	-3.69	0.987423	32	-3.69	-3.69	0.987423	-3.566								-3.58605	-3.69208	-3.71732	-3.70204	-3.67881								-0.0285535	0.0231174	-0.00271803		4.41985	4.41821	4.41903
32_Uracil-Ethyne_1.05	-3.57104	252	-3.591	252			32	-3.69	-3.54584	0.987423	-3.43384								-3.47686	-3.56485	-3.58347	-3.57104	-3.55214								-0.0258468	0.0212553	-0.00229577		4.11292	4.11119	4.11206
32_Uracil-Ethyne_1.10	-3.28142	253	-3.291	253			32	-3.69	-3.24961	0.987423	-3.14761								-3.20476	-3.27843	-3.29155	-3.28142	-3.26601								-0.0235592	0.019447	-0.0020561		3.69212	3.69041	3.69127
32_Uracil-Ethyne_1.25	-2.23208	254	-2.225	254			32	-3.69	-2.19702	0.987423	-2.12602								-2.18989	-2.23557	-2.23766	-2.23208	-2.22357								-0.0178757	0.0148982	-0.00148872		2.41452	2.41302	2.41377
32_Uracil-Ethyne_1.50	-1.05367	255	-1.042	255			32	-3.69	-1.02889	0.987423	-0.993895								-1.03647	-1.06203	-1.05595	-1.05367	-1.05019								-0.0115983	0.00897782	-0.00131023		1.10378	1.10214	1.10296
32_Uracil-Ethyne_2.00	-0.277912	256	-0.273	256			32	-3.69	-0.269566	0.987423	-0.259566								-0.274003	-0.290132	-0.27843	-0.277912	-0.27712								-0.00619236	0.00231259	-0.00193988		0.281275	0.280895	0.281085
33_Pyridine-Ethene_0.90	-0.764551	257	-0.885	257			33	-1.8	-0.855991	0.967222	-0.737991								-0.587061	-0.71653	-0.795308	-0.764551	-0.745041								-0.00749183	0.0257141	0.00911112		2.62225	2.62018	2.62121
33_Pyridine-Ethene_0.95	-1.54094	258	-1.622	258			33	-1.8	-1.56883	0.967222	-1.45883								-1.39801	-1.49858	-1.56583	-1.54094	-1.52511								-0.00367632	0.0249261	0.0106249		2.96883	2.96572	2.96727
33_Pyridine-Ethene_1.00	-1.8083	259	-1.861	259	-1.8	0.967222	33	-1.8	-1.8	0.967222	-1.701								-1.69284	-1.77112	-1.82847	-1.8083	-1.79543								-0.00133258	0.0233126	0.01099		2.9124	2.9086	2.9105
33_Pyridine-Ethene_1.05	-1.79853	260	-1.83	260			33	-1.8	-1.77002	0.967222	-1.68202								-1.70505	-1.76609	-1.8149	-1.79853	-1.78804								-0.000210544	0.0210462	0.0104178		2.65716	2.65298	2.65507
33_Pyridine-Ethene_1.10	-1.65103	261	-1.668	261			33	-1.8	-1.61333	0.967222	-1.53733								-1.57513	-1.62288	-1.66435	-1.65103	-1.64246								9.24431e-05	0.0184623	0.00927737		2.323	2.31868	2.32084
33_Pyridine-Ethene_1.25	-1.02959	262	-1.027	262			33	-1.8	-0.993337	0.967222	-0.950337								-0.988222	-1.01146	-1.03688	-1.02959	-1.02486								-0.000759085	0.01138	0.00531045		1.36322	1.3596	1.36141
33_Pyridine-Ethene_1.50	-0.373598	263	-0.366	263			33	-1.8	-0.354003	0.967222	-0.334003								-0.357032	-0.363868	-0.376522	-0.373598	-0.371681								-0.00223363	0.00492987	0.00134812		0.486801	0.485918	0.486359
33_Pyridine-Ethene_2.00	-0.0492694	264	-0.046	264			33	-1.8	-0.0444922	0.967222	-0.0374922								-0.0454681	-0.0452529	-0.0499408	-0.0492694	-0.0488264								-0.00238205	0.000885869	-0.000748093		0.0663553	0.0675077	0.0669315
34_Pentane-Pentane_0.90	-2.91887	265	-2.856	265			34	-3.76	-2.84541	0.99629	-2.73241								-2.70101	-2.86669	-2.97007	-2.91887	-2.90487								-0.00599189	0.0160417	0.00502493		3.25559	3.25538	3.25549
34_Pentane-Pentane_0.95	-3.67445	266	-3.62	266			34	-3.76	-3.60657	0.99629	-3.50157								-3.49627	-3.62974	-3.71639	-3.67445	-3.66267								-0.00385931	0.0140663	0.00510348		3.89015	3.88929	3.88972
34_Pentane-Pentane_1.00	-3.81979	267	-3.774	267	-3.76	0.99629	34	-3.76	-3.76	0.99629	-3.664								-3.67357	-3.78158	-3.85425	-3.81979	-3.8099								-0.00241082	0.0121708	0.00487999		3.96153	3.96018	3.96085
34_Pentane-Pentane_1.05	-3.65128	268	-3.613	268			34	-3.76	-3.5996	0.99629	-3.5146								-3.53089	-3.61858	-3.67967	-3.65128	-3.64297								-0.001462	0.0104469	0.00449247		3.74822	3.74655	3.74738
34_Pentane-Pentane_1.10	-3.33681	269	-3.304	269			34	-3.76	-3.29174	0.99629	-3.21574								-3.2373	-3.30873	-3.36028	-3.33681	-3.32983								-0.000817568	0.00892027	0.00405135		3.40712	3.40515	3.40613
34_Pentane-Pentane_1.25	-2.25711	270	-2.235	270			34	-3.76	-2.22671	0.99629	-2.17671								-2.19949	-2.23883	-2.27071	-2.25711	-2.25293								0.000282897	0.00572962	0.00300626		2.2963	2.29433	2.29531
34_Pentane-Pentane_1.50	-1.06638	271	-1.05	271			34	-3.76	-1.0461	0.99629	-1.0181								-1.04093	-1.05644	-1.07239	-1.06638	-1.06448								0.000214892	0.00279939	0.00150714		1.0914	1.09032	1.09086
34_Pentane-Pentane_2.00	-0.278441	272	-0.27	272			34	-3.76	-0.268998	0.99629	-0.258998								-0.271632	-0.274961	-0.280046	-0.278441	-0.277923								9.08051e-06	0.000601299	0.00030519		0.289629	0.288664	0.289146
35_Neopentane-Pentane_0.90	-1.91344	273	-1.852	273			35	-2.6	-1.8442	0.995787	-1.7612								-1.75363	-1.87314	-1.95083	-1.91344	-1.90344								-0.00812535	0.0104246	0.00114961		2.04683	2.0487	2.04777
35_Neopentane-Pentane_0.95	-2.54217	274	-2.492	274			35	-2.6	-2.4815	0.995787	-2.4055								-2.41403	-2.50837	-2.57219	-2.54217	-2.53396								-0.00634464	0.00881801	0.00123668		2.59949	2.60081	2.60015
35_Neopentane-Pentane_1.00	-2.65134	275	-2.611	275	-2.6	0.995787	35	-2.6	-2.6	0.995787	-2.533								-2.54776	-2.62304	-2.67563	-2.65134	-2.64457								-0.00504025	0.0074308	0.00119528		2.6702	2.67115	2.67068
35_Neopentane-Pentane_1.05	-2.51754	276	-2.484	276			35	-2.6	-2.47354	0.995787	-2.41554								-2.43323	-2.49371	-2.53731	-2.51754	-2.51194								-0.00396074	0.00624143	0.00114035		2.51853	2.51901	2.51877
35_Neopentane-Pentane_1.10	-2.28186	277	-2.254	277			35	-2.6	-2.2445	0.995787	-2.1935								-2.21277	-2.2616	-2.29807	-2.28186	-2.27721								-0.00306913	0.00527004	0.00110046		2.2758	2.27591	2.27585
35_Neopentane-Pentane_1.25	-1.51579	278	-1.496	278			35	-2.6	-1.4897	0.995787	-1.4567								-1.47623	-1.50261	-1.52507	-1.51579	-1.51306								-0.00129939	0.00340853	0.00105457		1.51107	1.51063	1.51085
35_Neopentane-Pentane_1.50	-0.711231	279	-0.698	279			35	-2.6	-0.695059	0.995787	-0.675059								-0.693654	-0.704175	-0.715354	-0.711231	-0.709993								-0.000414181	0.0018182	0.000702012		0.71518	0.714889	0.715034
35_Neopentane-Pentane_2.00	-0.191308	280	-0.184	280			35	-2.6	-0.183225	0.995787	-0.177225								-0.186446	-0.18906	-0.192449	-0.191308	-0.190961								-2.72505e-06	0.000545111	0.000271193		0.195392	0.1947	0.195046
36_Neopentane-Neopentane_0.90	-1.48419	281	-1.454	281			36	-1.76	-1.44415	0.993228	-1.39315								-1.37676	-1.45802	-1.50922	-1.48419	-1.47764								-0.00639271	0.0069319	0.000269595		1.44659	1.44856	1.44758
36_Neopentane-Neopentane_0.95	-1.75788	282	-1.735	282			36	-1.76	-1.72325	0.993228	-1.67625								-1.66981	-1.73551	-1.77841	-1.75788	-1.75243								-0.00558343	0.00563543	2.60007e-05		1.7029	1.70419	1.70354
36_Neopentane-Neopentane_1.00	-1.79011	283	-1.772	283	-1.76	0.993228	36	-1.76	-1.76	0.993228	-1.718								-1.71754	-1.77093	-1.80703	-1.79011	-1.78556								-0.00491184	0.00455351	-0.000179162		1.73126	1.7319	1.73158
36_Neopentane-Neopentane_1.05	-1.6984	284	-1.684	284			36	-1.76	-1.6726	0.993228	-1.6356								-1.63832	-1.68179	-1.71241	-1.6984	-1.69459								-0.00419506	0.003574	-0.000310531		1.64267	1.64226	1.64246
36_Neopentane-Neopentane_1.10	-1.55092	285	-1.537	285			36	-1.76	-1.52659	0.993228	-1.49359								-1.50093	-1.53635	-1.56258	-1.55092	-1.54772								-0.0035574	0.00299687	-0.000280264		1.50002	1.49967	1.49984
36_Neopentane-Neopentane_1.25	-1.06046	286	-1.048	286			36	-1.76	-1.0409	0.993228	-1.0189								-1.03081	-1.05024	-1.06738	-1.06046	-1.05853								-0.0019813	0.00189179	-4.47556e-05		1.0284	1.02783	1.02811
36_Neopentane-Neopentane_1.50	-0.512297	287	-0.504	287			36	-1.76	-0.500587	0.993228	-0.486587								-0.498789	-0.506694	-0.515448	-0.512297	-0.511405								-0.000643135	0.00138725	0.000372058		0.50344	0.503399	0.503419
36_Neopentane-Neopentane_2.00	-0.138908	288	-0.135	288			36	-1.76	-0.134086	0.993228	-0.130086								-0.135194	-0.137016	-0.139775	-0.138908	-0.13866								-0.00012357	0.000293328	8.48791e-05		0.139997	0.139375	0.139686
37_Cyclopentane-Neopentane_0.90	-1.66886	289	-1.607	289			37	-2.4	-1.60366	0.997921	-1.52666								-1.50831	-1.6235	-1.70511	-1.66886	-1.65753								-0.0068971	0.0100494	0.00157613		1.85068	1.85146	1.85107
37_Cyclopentane-Neopentane_0.95	-2.29906	290	-2.25	290			37	-2.4	-2.24532	0.997921	-2.17432								-2.17022	-2.26115	-2.3282	-2.29906	-2.28978								-0.00496293	0.00857748	0.00180727		2.39292	2.39315	2.39303
37_Cyclopentane-Neopentane_1.00	-2.44277	291	-2.405	291	-2.4	0.997921	37	-2.4	-2.4	0.997921	-2.336								-2.33834	-2.41102	-2.46641	-2.44277	-2.43512								-0.00365531	0.00724024	0.00179247		2.48953	2.48935	2.48944
37_Cyclopentane-Neopentane_1.05	-2.35362	292	-2.325	292			37	-2.4	-2.32017	0.997921	-2.26417								-2.26831	-2.32683	-2.37294	-2.35362	-2.34727								-0.00284429	0.00606739	0.00161155		2.37574	2.37541	2.37558
37_Cyclopentane-Neopentane_1.10	-2.16092	293	-2.138	293			37	-2.4	-2.13356	0.997921	-2.08556								-2.09073	-2.13807	-2.17682	-2.16092	-2.15564								-0.00230018	0.00511017	0.001405		2.17078	2.17039	2.17058
37_Cyclopentane-Neopentane_1.25	-1.48153	294	-1.467	294			37	-2.4	-1.46395	0.997921	-1.43295								-1.4409	-1.46617	-1.49073	-1.48153	-1.4784								-0.0011228	0.0032016	0.0010394		1.48323	1.4824	1.48282
37_Cyclopentane-Neopentane_1.50	-0.71648	295	-0.706	295			37	-2.4	-0.704532	0.997921	-0.687532								-0.698231	-0.707389	-0.720613	-0.71648	-0.71505								-0.000356337	0.00172787	0.000685767		0.722603	0.721783	0.722193
37_Cyclopentane-Neopentane_2.00	-0.194453	296	-0.188	296			37	-2.4	-0.187609	0.997921	-0.186609								-0.189409	-0.190285	-0.195596	-0.194453	-0.194053								0.00023587	0.000684154	0.000460012		0.200259	0.199054	0.199657
38_Cyclopentane-Cyclopentane_0.90	-2.30091	297	-2.237	297			38	-2.99	-2.23178	0.997664	-2.13178								-2.11784	-2.25237	-2.34098	-2.30091	-2.28582								-0.00367042	0.0114739	0.00390172		2.55427	2.55201	2.55314
38_Cyclopentane-Cyclopentane_0.95	-2.89424	298	-2.842	298			38	-2.99	-2.83536	0.997664	-2.74036								-2.74282	-2.85238	-2.92742	-2.89424	-2.88154								-0.00199533	0.0102143	0.00410946		3.05523	3.05262	3.05392
38_Cyclopentane-Cyclopentane_1.00	-3.03815	299	-2.997	299	-2.99	0.997664	38	-2.99	-2.99	0.997664	-2.903								-2.91532	-3.00288	-3.06509	-3.03815	-3.02768								-0.000968856	0.00877607	0.0039036		3.13704	3.13438	3.13571
38_Cyclopentane-Cyclopentane_1.05	-2.8931	300	-2.86	300			38	-2.99	-2.85332	0.997664	-2.77532								-2.79359	-2.86354	-2.91493	-2.8931	-2.88449								-0.000530152	0.00737804	0.00342395		2.95639	2.95386	2.95513
38_Cyclopentane-Cyclopentane_1.10	-2.62129	301	-2.595	301			38	-2.99	-2.58894	0.997664	-2.52094								-2.5401	-2.59633	-2.63911	-2.62129	-2.61419								-0.000407193	0.0061742	0.0028835		2.66556	2.66335	2.66445
38_Cyclopentane-Cyclopentane_1.25	-1.73072	302	-1.713	302			38	-2.99	-1.709	0.997664	-1.662								-1.68475	-1.71447	-1.74081	-1.73072	-1.72661								-0.000243927	0.00377885	0.00176746		1.75597	1.75451	1.75524
38_Cyclopentane-Cyclopentane_1.50	-0.803855	303	-0.791	303			38	-2.99	-0.789152	0.997664	-0.764152								-0.783733	-0.794773	-0.808271	-0.803855	-0.802026								-0.000215746	0.00192829	0.000856271		0.822221	0.82164	0.821931
38_Cyclopentane-Cyclopentane_2.00	-0.21123	304	-0.204	304			38	-2.99	-0.203524	0.997664	-0.199524								-0.205761	-0.20792	-0.21243	-0.21123	-0.210727								4.77391e-05	0.000492224	0.000269982		0.22087	0.219709	0.220289
39_Benzene-Cyclopentane_0.90	-2.14254	305	-2.156	305			39	-3.51	-2.12036	0.983469	-1.92636								-1.89638	-2.06654	-2.18956	-2.14254	-2.11999								-0.0298565	0.01636	-0.00674826		3.88401	3.88887	3.88644
39_Benzene-Cyclopentane_0.95	-3.24254	306	-3.239	306			39	-3.51	-3.18546	0.983469	-3.01146								-3.04261	-3.17909	-3.28085	-3.24254	-3.2239								-0.0259943	0.0150272	-0.00548355		4.58604	4.59025	4.58815
39_Benzene-Cyclopentane_1.00	-3.58357	307	-3.569	307	-3.51	0.983469	39	-3.51	-3.51	0.983469	-3.35								-3.4219	-3.53162	-3.61464	-3.58357	-3.56826								-0.0225294	0.0138059	-0.00436176		4.6228	4.6264	4.6246
39_Benzene-Cyclopentane_1.05	-3.49181	308	-3.47	308			39	-3.51	-3.41264	0.983469	-3.27864								-3.36151	-3.45017	-3.5169	-3.49181	-3.4793								-0.0193278	0.0125607	-0.00338353		4.30061	4.30339	4.302
39_Benzene-Cyclopentane_1.10	-3.19344	309	-3.167	309			39	-3.51	-3.11465	0.983469	-2.99665								-3.08789	-3.16046	-3.21378	-3.19344	-3.18318								-0.0163473	0.0113029	-0.00252222		3.83318	3.83477	3.83397
39_Benzene-Cyclopentane_1.25	-2.09435	310	-2.065	310			39	-3.51	-2.03086	0.983469	-1.95886								-2.0363	-2.07866	-2.10556	-2.09435	-2.08857								-0.00902877	0.00787337	-0.000577699		2.43635	2.43432	2.43533
39_Benzene-Cyclopentane_1.50	-0.91841	311	-0.895	311			39	-3.51	-0.880205	0.983469	-0.847205								-0.894393	-0.915584	-0.923052	-0.91841	-0.915978								-0.00424663	0.00386555	-0.00019054		1.05597	1.05408	1.05503
39_Benzene-Cyclopentane_2.00	-0.199481	312	-0.189	312			39	-3.51	-0.185876	0.983469	-0.177876								-0.193954	-0.206066	-0.20055	-0.199481	-0.198915								-0.00212911	0.000921471	-0.000603821		0.228283	0.226791	0.227537
40_Benzene-Neopentane_0.90	-1.85878	313	-1.863	313			40	-2.85	-1.83468	0.984796	-1.68468								-1.66924	-1.79522	-1.89644	-1.85878	-1.84331								-0.0305849	0.0125274	-0.00902872		3.05217	3.05861	3.05539
40_Benzene-Neopentane_0.95	-2.68281	314	-2.675	314			40	-2.85	-2.63433	0.984796	-2.50133								-2.52942	-2.62944	-2.71337	-2.68281	-2.67009								-0.0270979	0.0113497	-0.0078741		3.59481	3.60058	3.5977
40_Benzene-Neopentane_1.00	-2.90941	315	-2.894	315	-2.85	0.984796	40	-2.85	-2.85	0.984796	-2.737								-2.78494	-2.86495	-2.93425	-2.90941	-2.89893								-0.0237591	0.0104325	-0.0066633		3.61665	3.62152	3.61909
40_Benzene-Neopentane_1.05	-2.82401	316	-2.804	316			40	-2.85	-2.76137	0.984796	-2.66537								-2.72279	-2.78718	-2.84424	-2.82401	-2.81539								-0.0204663	0.00957172	-0.00544729		3.38073	3.38441	3.38257
40_Benzene-Neopentane_1.10	-2.59065	317	-2.568	317			40	-2.85	-2.52896	0.984796	-2.44796								-2.50806	-2.56011	-2.60716	-2.59065	-2.58354								-0.0172873	0.00868177	-0.00430279		3.0354	3.03764	3.03652
40_Benzene-Neopentane_1.25	-1.72948	318	-1.703	318			40	-2.85	-1.67711	0.984796	-1.63111								-1.68326	-1.71088	-1.73873	-1.72948	-1.72542								-0.00925237	0.00634548	-0.00145345		1.97203	1.97006	1.97105
40_Benzene-Neopentane_1.50	-0.786207	319	-0.765	319			40	-2.85	-0.753369	0.984796	-0.732369								-0.766563	-0.777001	-0.790142	-0.786207	-0.784454								-0.00447007	0.00318442	-0.000642823		0.887253	0.88548	0.886367
40_Benzene-Neopentane_2.00	-0.195601	320	-0.187	320			40	-2.85	-0.184157	0.984796	-0.177157								-0.190656	-0.193912	-0.196593	-0.195601	-0.195156								-0.00243683	0.000893782	-0.000771526		0.220166	0.219976	0.220071
41_Uracil-Pentane_0.90	-3.93232	321	-3.827	321			41	-4.81	-3.80406	0.994007	-3.52006								-3.61503	-3.79058	-3.98429	-3.93232	-3.87994								-0.0342297	0.0226574	-0.00578617		4.84251	4.81876	4.83063
41_Uracil-Pentane_0.95	-4.79242	322	-4.692	322			41	-4.81	-4.66388	0.994007	-4.40588								-4.52991	-4.66284	-4.8355	-4.79242	-4.74876								-0.0295812	0.0206261	-0.00447759		5.46315	5.43999	5.45157
41_Uracil-Pentane_1.00	-4.93376	323	-4.839	323	-4.81	0.994007	41	-4.81	-4.81	0.994007	-4.579								-4.7165	-4.81483	-4.96946	-4.93376	-4.89738								-0.0256972	0.0186772	-0.00351		5.4335	5.41151	5.4225
41_Uracil-Pentane_1.05	-4.68928	324	-4.6	324			41	-4.81	-4.57243	0.994007	-4.36643								-4.50951	-4.57969	-4.71885	-4.68928	-4.659								-0.0222592	0.0168191	-0.00272005		5.06588	5.04531	5.05559
41_Uracil-Pentane_1.10	-4.1628	325	-4.079	325			41	-4.81	-4.05455	0.994007	-3.87755								-4.01938	-4.06285	-4.18641	-4.1628	-4.13851								-0.0184922	0.0147597	-0.00186629		4.43617	4.41728	4.42673
41_Uracil-Pentane_1.25	-2.50794	326	-2.443	326			41	-4.81	-2.42836	0.994007	-2.31836								-2.43223	-2.42789	-2.52042	-2.50794	-2.49496								-0.00984114	0.00991796	3.84067e-05		2.63307	2.61769	2.62538
41_Uracil-Pentane_1.50	-1.01178	327	-0.976	327			41	-4.81	-0.970151	0.994007	-0.915151								-0.981606	-0.947399	-1.01675	-1.01178	-1.00656								-0.00391854	0.00469054	0.000385998		1.06493	1.05401	1.05947
41_Uracil-Pentane_2.00	-0.227902	328	-0.213	328			41	-4.81	-0.211723	0.994007	-0.193723								-0.220535	-0.174067	-0.229117	-0.227902	-0.22662								-0.00124546	0.00125747	6.00505e-06		0.239534	0.236843	0.238188
42_Uracil-Cyclopentane_0.90	-3.14593	329	-3.049	329			42	-4.09	-3.01801	0.989835	-2.74501								-2.85236	-3.01994	-3.19209	-3.14593	-3.09545								-0.0307767	0.0214904	-0.00464318		4.04485	4.0218	4.03333
42_Uracil-Cyclopentane_0.95	-4.06178	330	-3.968	330			42	-4.09	-3.92767	0.989835	-3.67967								-3.82226	-3.94875	-4.09951	-4.06178	-4.02029								-0.0260517	0.0196473	-0.00320217		4.70953	4.68749	4.69851
42_Uracil-Cyclopentane_1.00	-4.22087	331	-4.132	331	-4.09	0.989835	42	-4.09	-4.09	0.989835	-3.869								-4.02495	-4.1191	-4.25178	-4.22087	-4.18672								-0.022137	0.017824	-0.0021565		4.69684	4.67586	4.68635
42_Uracil-Cyclopentane_1.05	-4.00123	332	-3.919	332			42	-4.09	-3.87917	0.989835	-3.68517								-3.84062	-3.90924	-4.02659	-4.00123	-3.97308								-0.0187637	0.0159412	-0.00141122		4.3589	4.33865	4.34877
42_Uracil-Cyclopentane_1.10	-3.61506	333	-3.539	333			42	-4.09	-3.50303	0.989835	-3.33303								-3.48302	-3.53151	-3.63593	-3.61506	-3.59183								-0.0158346	0.0141773	-0.000828672		3.89008	3.87081	3.88044
42_Uracil-Cyclopentane_1.25	-2.35201	334	-2.294	334			42	-4.09	-2.27068	0.989835	-2.15768								-2.27702	-2.28679	-2.36388	-2.35201	-2.33868								-0.00890974	0.00980166	0.000445959		2.49481	2.47831	2.48656
42_Uracil-Cyclopentane_1.50	-1.05203	335	-1.017	335			42	-4.09	-1.00666	0.989835	-0.948663								-1.01979	-1.00189	-1.05714	-1.05203	-1.04626								-0.00362504	0.00496585	0.00067041		1.11522	1.10385	1.10954
42_Uracil-Cyclopentane_2.00	-0.262721	336	-0.247	336			42	-4.09	-0.244489	0.989835	-0.228489								-0.254267	-0.223378	-0.264059	-0.262721	-0.261198								-0.00161112	0.00129461	-0.000158259		0.278277	0.274029	0.276153
43_Uracil-Neopentane_0.90	-2.95433	337	-2.868	337			43	-3.69	-2.86025	0.997297	-2.63825								-2.72634	-2.83547	-2.99156	-2.95433	-2.91682								-0.0276342	0.0181307	-0.00475176		3.47138	3.45278	3.46208
43_Uracil-Neopentane_0.95	-3.68368	338	-3.599	338			43	-3.69	-3.58927	0.997297	-3.38827								-3.49789	-3.57345	-3.71405	-3.68368	-3.65293								-0.0235117	0.0164458	-0.00353295		4.04453	4.02648	4.0355
43_Uracil-Neopentane_1.00	-3.78166	339	-3.7	339	-3.69	0.997297	43	-3.69	-3.69	0.997297	-3.51								-3.62964	-3.679	-3.80653	-3.78166	-3.75638								-0.0200739	0.0150645	-0.00250467		4.03662	4.02004	4.02833
43_Uracil-Neopentane_1.05	-3.56649	340	-3.489	340			43	-3.69	-3.47957	0.997297	-3.31957								-3.44168	-3.47048	-3.58693	-3.56649	-3.54565								-0.0172444	0.0133383	-0.00195307		3.75058	3.73441	3.7425
43_Uracil-Neopentane_1.10	-3.21715	341	-3.145	341			43	-3.69	-3.1365	0.997297	-2.9955								-3.11427	-3.12693	-3.234	-3.21715	-3.19991								-0.0147666	0.0118205	-0.00147307		3.35291	3.33742	3.34517
43_Uracil-Neopentane_1.25	-2.10216	342	-2.045	342			43	-3.69	-2.03947	0.997297	-1.94347								-2.04318	-2.02492	-2.11182	-2.10216	-2.0922								-0.00878489	0.00812827	-0.000328309		2.16644	2.1527	2.15957
43_Uracil-Neopentane_1.50	-0.955087	343	-0.92	343			43	-3.69	-0.917514	0.997297	-0.865514								-0.929521	-0.889668	-0.959279	-0.955087	-0.95074								-0.00326681	0.00442002	0.000576605		0.984346	0.97421	0.979278
43_Uracil-Neopentane_2.00	-0.243577	344	-0.229	344			43	-3.69	-0.228381	0.997297	-0.209381								-0.236735	-0.186936	-0.2447	-0.243577	-0.242409								-0.00141498	0.00106932	-0.000172833		0.249856	0.246713	0.248285
44_Ethene-Pentane_0.90	-1.64737	345	-1.656	345			44	-1.99	-1.65683	1.0005	-1.60583								-1.5357	-1.62646	-1.67362	-1.64737	-1.63994								-0.00565157	0.0115345	0.00294146		1.91778	1.91523	1.91651
44_Ethene-Pentane_0.95	-1.96622	346	-1.971	346			44	-1.99	-1.97199	1.0005	-1.92399								-1.87594	-1.94838	-1.98749	-1.96622	-1.96011								-0.004315	0.0104113	0.00304816		2.15299	2.15024	2.15161
44_Ethene-Pentane_1.00	-1.98672	347	-1.989	347	-1.99	1.0005	44	-1.99	-1.99	1.0005	-1.947								-1.91341	-1.9716	-2.004	-1.98672	-1.98168								-0.00331642	0.00931681	0.00300019		2.11994	2.11702	2.11848
44_Ethene-Pentane_1.05	-1.86125	348	-1.862	348			44	-1.99	-1.86294	1.0005	-1.82494								-1.80149	-1.84848	-1.87534	-1.86125	-1.85709								-0.00257516	0.00829395	0.00285939		1.95984	1.9568	1.95832
44_Ethene-Pentane_1.10	-1.67396	349	-1.674	349			44	-1.99	-1.67484	1.0005	-1.64184								-1.62503	-1.66317	-1.68551	-1.67396	-1.67052								-0.00202231	0.00735198	0.00266483		1.7498	1.7467	1.74825
44_Ethene-Pentane_1.25	-1.09294	350	-1.09	350			44	-1.99	-1.09055	1.0005	-1.06755								-1.06518	-1.08619	-1.09949	-1.09294	-1.09095								-0.00100364	0.00514432	0.00207034		1.13429	1.13126	1.13277
44_Ethene-Pentane_1.50	-0.49698	351	-0.492	351			44	-1.99	-0.492247	1.0005	-0.480247								-0.48474	-0.493514	-0.499868	-0.49698	-0.496085								-0.000779343	0.00282056	0.00102061		0.516145	0.514102	0.515124
44_Ethene-Pentane_2.00	-0.123279	352	-0.12	352			44	-1.99	-0.12006	1.0005	-0.11706								-0.120138	-0.12264	-0.124021	-0.123279	-0.123047								-0.000758951	0.000687511	-3.572e-05		0.128998	0.128231	0.128614
45_Ethyne-Pentane_0.90	-1.04531	353	-1.134	353			45	-1.72	-1.1152	0.983419	-1.0652								-0.939508	-1.04982	-1.06842	-1.04531	-1.03797								-0.028221	0.0137911	-0.00721494		1.75214	1.75758	1.75486
45_Ethyne-Pentane_0.95	-1.56349	354	-1.631	354			45	-1.72	-1.60396	0.983419	-1.55796								-1.47935	-1.57017	-1.58189	-1.56349	-1.55757								-0.0251919	0.0128837	-0.00615405		2.09769	2.10224	2.09997
45_Ethyne-Pentane_1.00	-1.69762	355	-1.749	355	-1.72	0.983419	45	-1.72	-1.72	0.983419	-1.679								-1.63045	-1.70618	-1.71234	-1.69762	-1.69285								-0.0224846	0.0121079	-0.00518835		2.10685	2.11065	2.10875
45_Ethyne-Pentane_1.05	-1.63779	356	-1.676	356			45	-1.72	-1.64821	0.983419	-1.61221								-1.58397	-1.64791	-1.64958	-1.63779	-1.63393								-0.0200301	0.0114052	-0.00431247		1.95531	1.95842	1.95687
45_Ethyne-Pentane_1.10	-1.48983	357	-1.519	357			45	-1.72	-1.49381	0.983419	-1.46181								-1.44655	-1.50123	-1.49932	-1.48983	-1.4867								-0.0177338	0.0107627	-0.00348555		1.73943	1.74186	1.74065
45_Ethyne-Pentane_1.25	-0.966266	358	-0.977	358			45	-1.72	-0.9608	0.983419	-0.9398								-0.943089	-0.980181	-0.971354	-0.966266	-0.964568								-0.0116505	0.00901432	-0.00131807		1.096	1.09636	1.09618
45_Ethyne-Pentane_1.50	-0.420584	359	-0.421	359			45	-1.72	-0.414019	0.983419	-0.401019								-0.411112	-0.436352	-0.422664	-0.420584	-0.419882								-0.00665091	0.00558628	-0.000532315		0.470967	0.46996	0.470463
45_Ethyne-Pentane_2.00	-0.0981162	360	-0.097	360			45	-1.72	-0.0953917	0.983419	-0.0923917								-0.0961691	-0.115633	-0.0985441	-0.0981162	-0.0979711								-0.0019751	0.0013464	-0.000314354		0.110983	0.108316	0.10965
46_Peptide-Pentane_0.90	-3.81429	361	-3.751	361			46	-4.26	-3.76514	1.00377	-3.60714								-3.59213	-3.74999	-3.85824	-3.81429	-3.78618								-0.0147375	0.0184048	0.00183365		4.1798	4.16912	4.17446
46_Peptide-Pentane_0.95	-4.26368	362	-4.205	362			46	-4.26	-4.22085	1.00377	-4.07385								-4.07619	-4.20537	-4.30081	-4.26368	-4.23973								-0.0122163	0.0168485	0.00231609		4.52294	4.51241	4.51768
46_Peptide-Pentane_1.00	-4.29754	363	-4.244	363	-4.26	1.00377	46	-4.26	-4.26	1.00377	-4.124								-4.13933	-4.24466	-4.32891	-4.29754	-4.27717								-0.0101658	0.015308	0.00257113		4.4835	4.47327	4.47838
46_Peptide-Pentane_1.05	-4.09624	364	-4.048	364			46	-4.26	-4.06326	1.00377	-3.93526								-3.96271	-4.04819	-4.12274	-4.09624	-4.07893								-0.00851187	0.0138125	0.00265034		4.23164	4.22189	4.22676
46_Peptide-Pentane_1.10	-3.77452	365	-3.73	365			46	-4.26	-3.74406	1.00377	-3.62806								-3.66169	-3.73071	-3.79692	-3.77452	-3.7598								-0.00713024	0.012386	0.00262786		3.87524	3.86599	3.87062
46_Peptide-Pentane_1.25	-2.66244	366	-2.628	366			46	-4.26	-2.63791	1.00377	-2.55691								-2.59358	-2.62843	-2.67613	-2.66244	-2.65334								-0.00392517	0.00882828	0.00245155		2.71138	2.70375	2.70757
46_Peptide-Pentane_1.50	-1.21242	367	-1.188	367			46	-4.26	-1.19248	1.00377	-1.15248								-1.18336	-1.1885	-1.21819	-1.21242	-1.20852								-0.00164477	0.00445444	0.00140484		1.23332	1.22891	1.23111
46_Peptide-Pentane_2.00	-0.297776	368	-0.286	368			46	-4.26	-0.287078	1.00377	-0.274078								-0.290466	-0.281839	-0.299229	-0.297776	-0.296787								-0.000953405	0.000980234	1.34144e-05		0.303282	0.301471	0.302377
47_Benzene-Benzene_TS_0.90	-1.65707	369	-1.643	369			47	-2.83	-1.62236	0.987439	-1.44536								-1.47203	-1.57626	-1.68813	-1.65707	-1.63769								-0.0319087	0.015071	-0.00841885		3.17002	3.17503	3.17253
47_Benzene-Benzene_TS_0.95	-2.6025	370	-2.578	370			47	-2.83	-2.54562	0.987439	-2.38362								-2.45294	-2.53365	-2.62768	-2.6025	-2.58667								-0.0276642	0.0136342	-0.007015		3.76078	3.76456	3.76267
47_Benzene-Benzene_TS_1.00	-2.89781	371	-2.866	371	-2.83	0.987439	47	-2.83	-2.83	0.987439	-2.686								-2.77637	-2.83916	-2.91829	-2.89781	-2.88483								-0.0240125	0.0124827	-0.00576487		3.79492	3.79796	3.79644
47_Benzene-Benzene_TS_1.05	-2.8525	372	-2.816	372			47	-2.83	-2.78063	0.987439	-2.65563								-2.75357	-2.80263	-2.86922	-2.8525	-2.84185								-0.0208637	0.0113608	-0.00475145		3.55585	3.55812	3.55699
47_Benzene-Benzene_TS_1.10	-2.64267	373	-2.604	373			47	-2.83	-2.57129	0.987439	-2.46229								-2.56179	-2.60028	-2.65636	-2.64267	-2.63391								-0.0179065	0.0103394	-0.00378359		3.20149	3.20285	3.20217
47_Benzene-Benzene_TS_1.25	-1.80356	374	-1.767	374			47	-2.83	-1.7448	0.987439	-1.6758								-1.7582	-1.77686	-1.81125	-1.80356	-1.79857								-0.0100018	0.0072169	-0.00139243		2.10698	2.10352	2.10525
47_Benzene-Benzene_TS_1.50	-0.855794	375	-0.828	375			47	-2.83	-0.817599	0.987439	-0.780599								-0.836269	-0.841149	-0.859106	-0.855794	-0.853622								-0.00475408	0.00362098	-0.000566549		0.982227	0.97925	0.980739
47_Benzene-Benzene_TS_2.00	-0.237012	376	-0.224	376			47	-2.83	-0.221186	0.987439	-0.208186								-0.231593	-0.231203	-0.237932	-0.237012	-0.236405								-0.0032865	0.00097247	-0.00115702		0.265378	0.266062	0.26572
48_Pyridine-Pyridine_TS_0.90	-2.54666	377	-2.526	377			48	-3.51	-2.50956	0.99349	-2.36556								-2.36848	-2.48014	-2.57422	-2.54666	-2.52401								-0.0256369	0.0157962	-0.00492037		3.93156	3.93679	3.93417
48_Pyridine-Pyridine_TS_0.95	-3.33554	378	-3.307	378			48	-3.51	-3.28547	0.99349	-3.15247								-3.18919	-3.27756	-3.35822	-3.33554	-3.31682								-0.0220178	0.0148599	-0.00357893		4.41798	4.42233	4.42015
48_Pyridine-Pyridine_TS_1.00	-3.56603	379	-3.533	379	-3.51	0.99349	48	-3.51	-3.51	0.99349	-3.39								-3.44554	-3.51556	-3.58474	-3.56603	-3.55054								-0.0189228	0.0139928	-0.00246495		4.42171	4.42539	4.42355
48_Pyridine-Pyridine_TS_1.05	-3.48901	380	-3.453	380			48	-3.51	-3.43052	0.99349	-3.32352								-3.38966	-3.44517	-3.50445	-3.48901	-3.47617								-0.0162113	0.0130786	-0.00156634		4.17351	4.17655	4.17503
48_Pyridine-Pyridine_TS_1.10	-3.25501	381	-3.218	381			48	-3.51	-3.19705	0.99349	-3.10105								-3.17294	-3.21697	-3.26779	-3.25501	-3.24436								-0.0137607	0.0120406	-0.000860017		3.80982	3.81195	3.81089
48_Pyridine-Pyridine_TS_1.25	-2.32764	382	-2.292	382			48	-3.51	-2.27708	0.99349	-2.21008								-2.28054	-2.30241	-2.33498	-2.32764	-2.32147								-0.00791873	0.00879179	0.000436529		2.64393	2.64316	2.64355
48_Pyridine-Pyridine_TS_1.50	-1.20594	383	-1.178	383			48	-3.51	-1.17033	0.99349	-1.13133								-1.18557	-1.19191	-1.20912	-1.20594	-1.20325								-0.00392483	0.00474916	0.000412167		1.3492	1.34835	1.34877
48_Pyridine-Pyridine_TS_2.00	-0.384102	384	-0.371	384			48	-3.51	-0.368585	0.99349	-0.351585								-0.378924	-0.378988	-0.384912	-0.384102	-0.383415								-0.00258791	0.00143262	-0.000577644		0.424701	0.425788	0.425245
49_Benzene-Pyridine_TS_0.90	-2.09912	385	-2.087	385			49	-3.29	-2.06565	0.989771	-1.89065								-1.9167	-2.0227	-2.12851	-2.09912	-2.07796								-0.0322686	0.0143792	-0.00894467		3.55115	3.55815	3.55465
49_Benzene-Pyridine_TS_0.95	-3.0636	386	-3.041	386			49	-3.29	-3.00989	0.989771	-2.84789								-2.91654	-2.99843	-3.08736	-3.0636	-3.04639								-0.0280866	0.0129495	-0.00756857		4.17523	4.18089	4.17806
49_Benzene-Pyridine_TS_1.00	-3.35433	387	-3.324	387	-3.29	0.989771	49	-3.29	-3.29	0.989771	-3.145								-3.23529	-3.29874	-3.3736	-3.35433	-3.3403								-0.0245008	0.0117752	-0.00636282		4.21538	4.22006	4.21772
49_Benzene-Pyridine_TS_1.05	-3.29112	388	-3.257	388			49	-3.29	-3.22369	0.989771	-3.09569								-3.19448	-3.24382	-3.3068	-3.29112	-3.27966								-0.0213694	0.0107652	-0.00530214		3.96633	3.97016	3.96825
49_Benzene-Pyridine_TS_1.10	-3.05632	389	-3.02	389			49	-3.29	-2.98911	0.989771	-2.87811								-2.97762	-3.01611	-3.0691	-3.05632	-3.04693								-0.0185271	0.00981196	-0.00435756		3.593	3.596	3.5945
49_Benzene-Pyridine_TS_1.25	-2.13397	390	-2.098	390			49	-3.29	-2.07654	0.989771	-2.00254								-2.09049	-2.10879	-2.14104	-2.13397	-2.12872								-0.0107298	0.00718044	-0.00177466		2.42595	2.42536	2.42566
49_Benzene-Pyridine_TS_1.50	-1.07499	391	-1.049	391			49	-3.29	-1.03827	0.989771	-0.99627								-1.05694	-1.06145	-1.07793	-1.07499	-1.07279								-0.00505058	0.00360148	-0.000724548		1.2003	1.19884	1.19957
49_Benzene-Pyridine_TS_2.00	-0.344899	392	-0.333	392			49	-3.29	-0.329594	0.989771	-0.310594								-0.340299	-0.339589	-0.345648	-0.344899	-0.344335								-0.00332998	0.00096751	-0.00118123		0.376577	0.377406	0.376992
50_Benzene-Ethyne_CH-pi_0.90	-1.84672	393	-1.869	393			50	-2.86	-1.86639	0.998603	-1.78039								-1.74081	-1.81424	-1.86463	-1.84672	-1.83643								-0.0230505	0.0171229	-0.0029638		2.9142	2.92113	2.91766
50_Benzene-Ethyne_CH-pi_0.95	-2.63638	394	-2.646	394			50	-2.86	-2.6423	0.998603	-2.5603								-2.55258	-2.60794	-2.65058	-2.63638	-2.62818								-0.0204273	0.0149933	-0.00271702		3.44532	3.45115	3.44823
50_Benzene-Ethyne_CH-pi_1.00	-2.86486	395	-2.864	395	-2.86	0.998603	50	-2.86	-2.86	0.998603	-2.786								-2.79819	-2.83981	-2.87619	-2.86486	-2.85831								-0.018017	0.0133885	-0.00231423		3.48361	3.48868	3.48615
50_Benzene-Ethyne_CH-pi_1.05	-2.79952	396	-2.791	396			50	-2.86	-2.7871	0.998603	-2.7221								-2.7463	-2.77751	-2.80858	-2.79952	-2.79426								-0.015861	0.0121463	-0.00185732		3.27812	3.2826	3.28036
50_Benzene-Ethyne_CH-pi_1.10	-2.59289	397	-2.58	397			50	-2.86	-2.5764	0.998603	-2.5204								-2.5503	-2.57371	-2.60014	-2.59289	-2.58866								-0.0137537	0.0111101	-0.00132177		2.96844	2.97224	2.97034
50_Benzene-Ethyne_CH-pi_1.25	-1.80226	398	-1.785	398			50	-2.86	-1.78251	0.998603	-1.74351								-1.78001	-1.79005	-1.80605	-1.80226	-1.80002								-0.00709279	0.00831117	0.000609193		2.00143	2.0013	2.00136
50_Benzene-Ethyne_CH-pi_1.50	-0.902823	399	-0.889	399			50	-2.86	-0.887758	0.998603	-0.865758								-0.89432	-0.895798	-0.904275	-0.902823	-0.901962								-0.00297967	0.00402422	0.000522277		0.984793	0.983433	0.984113
50_Benzene-Ethyne_CH-pi_2.00	-0.277246	400	-0.271	400			50	-2.86	-0.270622	0.998603	-0.262622								-0.275478	-0.27373	-0.277548	-0.277246	-0.277066								-0.00235249	0.00106007	-0.000646213		0.295523	0.296518	0.29602
51_Ethyne-Ethyne_TS_0.90	-1.20308	401	-1.207	401			51	-1.54	-1.22047	1.01116	-1.20647								-1.16277	-1.19976	-1.21007	-1.20308	-1.20038								-0.0223575	0.0108007	-0.00577837		1.43927	1.44572	1.4425
51_Ethyne-Ethyne_TS_0.95	-1.46352	402	-1.47	402			51	-1.54	-1.48641	1.01116	-1.47041								-1.43166	-1.46133	-1.46905	-1.46352	-1.46136								-0.021051	0.00952673	-0.00576216		1.64309	1.64898	1.64603
51_Ethyne-Ethyne_TS_1.00	-1.51585	403	-1.523	403	-1.54	1.01116	51	-1.54	-1.54	1.01116	-1.521								-1.49061	-1.51441	-1.52023	-1.51585	-1.51413								-0.0197098	0.00856073	-0.00557455		1.65332	1.65875	1.65604
51_Ethyne-Ethyne_TS_1.05	-1.4559	404	-1.462	404			51	-1.54	-1.47832	1.01116	-1.45932								-1.4358	-1.45486	-1.45939	-1.4559	-1.45453								-0.0183137	0.00783093	-0.00524141		1.56139	1.56643	1.56391
51_Ethyne-Ethyne_TS_1.10	-1.34111	405	-1.346	405			51	-1.54	-1.36102	1.01116	-1.34302								-1.32496	-1.3402	-1.34392	-1.34111	-1.34001								-0.0168177	0.00726675	-0.00477547		1.42222	1.4268	1.42451
51_Ethyne-Ethyne_TS_1.25	-0.933765	406	-0.933	406			51	-1.54	-0.943414	1.01116	-0.929414								-0.924961	-0.93278	-0.935295	-0.933765	-0.933159								-0.0120736	0.0059419	-0.00306586		0.972949	0.975239	0.974094
51_Ethyne-Ethyne_TS_1.50	-0.46263	407	-0.461	407			51	-1.54	-0.466146	1.01116	-0.456146								-0.459291	-0.461904	-0.463211	-0.46263	-0.4624								-0.00755914	0.00341318	-0.00207298		0.478976	0.479269	0.479123
51_Ethyne-Ethyne_TS_2.00	-0.135484	408	-0.135	408			51	-1.54	-0.136507	1.01116	-0.133507								-0.134937	-0.135115	-0.135579	-0.135484	-0.135446								-0.000935735	0.0010351	4.96804e-05		0.141181	0.139241	0.140211
52_Benzene-AcOH_OH-pi_0.90	-4.00161	409	-3.968	409			52	-4.73	-3.98993	1.00553	-3.86593								-3.84069	-4.05531	-4.02614	-4.00161	-3.97312								-0.025684	0.0160603	-0.00481182		4.85276	4.84121	4.84699
52_Benzene-AcOH_OH-pi_0.95	-4.6131	410	-4.58	410			52	-4.73	-4.60531	1.00553	-4.49031								-4.47951	-4.6703	-4.6335	-4.6131	-4.58938								-0.0237582	0.0135839	-0.00508716		5.27023	5.25881	5.26452
52_Benzene-AcOH_OH-pi_1.00	-4.73718	411	-4.704	411	-4.73	1.00553	52	-4.73	-4.73	1.00553	-4.626								-4.62608	-4.79738	-4.75417	-4.73718	-4.71741								-0.0217243	0.0116617	-0.00503131		5.24858	5.23749	5.24303
52_Benzene-AcOH_OH-pi_1.05	-4.58343	412	-4.55	412			52	-4.73	-4.57515	1.00553	-4.48315								-4.49093	-4.64638	-4.59758	-4.58343	-4.56693								-0.0195447	0.0102459	-0.00464939		4.98507	4.9744	4.97974
52_Benzene-AcOH_OH-pi_1.10	-4.28292	413	-4.25	413			52	-4.73	-4.27349	1.00553	-4.19349								-4.2058	-4.34846	-4.29473	-4.28292	-4.26914								-0.0172816	0.00923663	-0.0040225		4.60205	4.5918	4.59693
52_Benzene-AcOH_OH-pi_1.25	-3.15593	414	-3.126	414			52	-4.73	-3.14328	1.00553	-3.09428								-3.1109	-3.22807	-3.16283	-3.15593	-3.14784								-0.0106207	0.00738609	-0.0016173		3.32965	3.32028	3.32497
52_Benzene-AcOH_OH-pi_1.50	-1.72199	415	-1.699	415			52	-4.73	-1.70839	1.00553	-1.68239								-1.70262	-1.8006	-1.72496	-1.72199	-1.71849								-0.00411902	0.00450404	0.000192513		1.80017	1.79317	1.79667
52_Benzene-AcOH_OH-pi_2.00	-0.564062	416	-0.554	416			52	-4.73	-0.557062	1.00553	-0.549062								-0.559265	-0.64797	-0.564798	-0.564062	-0.563193								-0.00277657	0.000998986	-0.00088879		0.584632	0.583826	0.584229
53_Benzene-AcNH2_NH-pi_0.90	-3.84881	417	-3.787	417			53	-4.4	-3.8235	1.00964	-3.6995								-3.71388	-3.87878	-3.87047	-3.84881	-3.82786								-0.0203584	0.0159557	-0.00220134		4.39449	4.37748	4.38598
53_Benzene-AcNH2_NH-pi_0.95	-4.32013	418	-4.265	418			53	-4.4	-4.3061	1.00964	-4.1841								-4.20768	-4.35275	-4.33821	-4.32013	-4.30263								-0.0177711	0.014711	-0.00153008		4.7405	4.72335	4.73192
53_Benzene-AcNH2_NH-pi_1.00	-4.40828	419	-4.358	419	-4.4	1.00964	53	-4.4	-4.4	1.00964	-4.281								-4.31432	-4.44306	-4.4234	-4.40828	-4.39362								-0.0155283	0.0135024	-0.00101293		4.7354	4.71832	4.72686
53_Benzene-AcNH2_NH-pi_1.05	-4.27029	420	-4.225	420			53	-4.4	-4.26572	1.00964	-4.15372								-4.19161	-4.30695	-4.28296	-4.27029	-4.25799								-0.0136002	0.0123337	-0.000633262		4.52774	4.51096	4.51935
53_Benzene-AcNH2_NH-pi_1.10	-4.0079	421	-3.967	421			53	-4.4	-4.00523	1.00964	-3.89923								-3.94185	-4.04629	-4.01855	-4.0079	-3.99756								-0.0119624	0.0112525	-0.00035493		4.21308	4.19695	4.20502
53_Benzene-AcNH2_NH-pi_1.25	-3.00521	422	-2.973	422			53	-4.4	-3.00165	1.00964	-2.91765								-2.96544	-3.04801	-3.01163	-3.00521	-2.99896								-0.008132	0.008456	0.000161999		3.11781	3.10439	3.1111
53_Benzene-AcNH2_NH-pi_1.50	-1.6679	423	-1.645	423			53	-4.4	-1.66085	1.00964	-1.60385								-1.64947	-1.71507	-1.67088	-1.6679	-1.66499								-0.00426803	0.00507947	0.000405716		1.71832	1.70972	1.71402
53_Benzene-AcNH2_NH-pi_2.00	-0.491778	424	-0.481	424			53	-4.4	-0.485636	1.00964	-0.446636								-0.48704	-0.5435	-0.492544	-0.491778	-0.491028								-0.00243081	0.00112146	-0.000654676		0.504725	0.502938	0.503832
54_Benzene-Water_OH-pi_0.90	-2.76563	425	-2.804	425			54	-3.29	-2.82288	1.00673	-2.75588								-2.6706	-2.86372	-2.78058	-2.76563	-2.75075								-0.0250169	0.00990906	-0.00755394		3.26638	3.26291	3.26464
54_Benzene-Water_OH-pi_0.95	-3.18554	426	-3.213	426			54	-3.29	-3.23463	1.00673	-3.17263								-3.10902	-3.28502	-3.19759	-3.18554	-3.17353								-0.0223964	0.00868714	-0.00685462		3.56874	3.56503	3.56689
54_Benzene-Water_OH-pi_1.00	-3.25011	427	-3.268	427	-3.29	1.00673	54	-3.29	-3.29	1.00673	-3.233								-3.18849	-3.35106	-3.25983	-3.25011	-3.24042								-0.0195155	0.0078459	-0.00583481		3.54713	3.543	3.54506
54_Benzene-Water_OH-pi_1.05	-3.12098	428	-3.132	428			54	-3.29	-3.15308	1.00673	-3.10308								-3.07139	-3.22345	-3.1288	-3.12098	-3.11316								-0.0165472	0.00724759	-0.00464979		3.35463	3.34999	3.35231
54_Benzene-Water_OH-pi_1.10	-2.89572	429	-2.901	429			54	-3.29	-2.92053	1.00673	-2.87653								-2.85585	-2.9997	-2.90202	-2.89572	-2.88942								-0.0137145	0.00675484	-0.00347983		3.08274	3.0776	3.08017
54_Benzene-Water_OH-pi_1.25	-2.10498	430	-2.102	430			54	-3.29	-2.11615	1.00673	-2.08515								-2.08435	-2.21273	-2.10824	-2.10498	-2.1017								-0.00736825	0.00504864	-0.00115981		2.21114	2.20519	2.20817
54_Benzene-Water_OH-pi_1.50	-1.16029	431	-1.156	431			54	-3.29	-1.16378	1.00673	-1.14378								-1.15323	-1.27094	-1.16141	-1.16029	-1.15917								-0.00399779	0.00219889	-0.000899447		1.20861	1.20564	1.20713
54_Benzene-Water_OH-pi_2.00	-0.419038	432	-0.416	432			54	-3.29	-0.4188	1.00673	-0.4138								-0.418306	-0.531627	-0.419154	-0.419038	-0.418921								-0.00175237	0.000549395	-0.000601488		0.433546	0.433302	0.433424
55_Benzene-MeOH_OH-pi_0.90	-3.40283	433	-3.453	433			55	-4.17	-3.43898	0.99594	-3.34198								-3.24348	-3.46135	-3.42958	-3.40283	-3.37951								-0.0240194	0.0143478	-0.00483581		4.37481	4.37232	4.37357
55_Benzene-MeOH_OH-pi_0.95	-4.01384	434	-4.047	434			55	-4.17	-4.03057	0.99594	-3.93957								-3.88325	-4.0766	-4.03582	-4.01384	-3.99463								-0.0210985	0.0128289	-0.00413477		4.77354	4.77043	4.77199
55_Benzene-MeOH_OH-pi_1.00	-4.16759	435	-4.187	435	-4.17	0.99594	55	-4.17	-4.17	0.99594	-4.085								-4.06044	-4.23411	-4.18566	-4.16759	-4.15176								-0.0183343	0.011551	-0.00339164		4.76579	4.76213	4.76396
55_Benzene-MeOH_OH-pi_1.05	-4.05688	436	-4.065	436			55	-4.17	-4.0485	0.99594	-3.9725								-3.96887	-4.12682	-4.07173	-4.05688	-4.04381								-0.0158135	0.0104866	-0.00266347		4.53159	4.52761	4.5296
55_Benzene-MeOH_OH-pi_1.10	-3.80401	437	-3.804	437			55	-4.17	-3.78856	0.99594	-3.72156								-3.73166	-3.87712	-3.81624	-3.80401	-3.79323								-0.0135507	0.00959475	-0.00197797		4.18445	4.18028	4.18237
55_Benzene-MeOH_OH-pi_1.25	-2.81332	438	-2.8	438			55	-4.17	-2.78863	0.99594	-2.74363								-2.77289	-2.89424	-2.82017	-2.81332	-2.80725								-0.0079666	0.00734768	-0.000309462		3.0233	3.01869	3.02099
55_Benzene-MeOH_OH-pi_1.50	-1.54163	439	-1.528	439			55	-4.17	-1.5218	0.99594	-1.4978								-1.52551	-1.62946	-1.54437	-1.54163	-1.53919								-0.00351116	0.00387706	0.000182951		1.63556	1.63171	1.63364
55_Benzene-MeOH_OH-pi_2.00	-0.525743	440	-0.517	440			55	-4.17	-0.514901	0.99594	-0.505901								-0.522279	-0.617894	-0.526331	-0.525743	-0.525216								-0.00239747	0.00100469	-0.000696386		0.549122	0.5493	0.549211
56_Benzene-MeNH2_NH-pi_0.90	-2.45699	441	-2.512	441			56	-3.2	-2.4879	0.990405	-2.3929								-2.30554	-2.44753	-2.48416	-2.45699	-2.43999								-0.022862	0.0146393	-0.00411137		3.49279	3.49259	3.49269
56_Benzene-MeNH2_NH-pi_0.95	-3.05074	442	-3.087	442			56	-3.2	-3.05738	0.990405	-2.96738								-2.9267	-3.04642	-3.07306	-3.05074	-3.0367								-0.0198447	0.0132925	-0.0032761		3.8598	3.85879	3.85929
56_Benzene-MeNH2_NH-pi_1.00	-3.20933	443	-3.231	443	-3.2	0.990405	56	-3.2	-3.2	0.990405	-3.12								-3.10756	-3.20969	-3.22768	-3.20933	-3.19773								-0.0172881	0.0120867	-0.0026007		3.84568	3.84424	3.84496
56_Benzene-MeNH2_NH-pi_1.05	-3.10912	444	-3.119	444			56	-3.2	-3.08907	0.990405	-3.01907								-3.02674	-3.11408	-3.124	-3.10912	-3.09966								-0.0149762	0.0109158	-0.00203017		3.60499	3.6034	3.6042
56_Benzene-MeNH2_NH-pi_1.10	-2.86149	445	-2.863	445			56	-3.2	-2.83553	0.990405	-2.77753								-2.79503	-2.87067	-2.8735	-2.86149	-2.85381								-0.0128774	0.0098198	-0.00152881		3.25022	3.24848	3.24935
56_Benzene-MeNH2_NH-pi_1.25	-1.96023	446	-1.95	446			56	-3.2	-1.93129	0.990405	-1.89429								-1.92451	-1.9787	-1.9667	-1.96023	-1.95604								-0.00760296	0.00684092	-0.000381023		2.16447	2.16165	2.16306
56_Benzene-MeNH2_NH-pi_1.50	-0.950967	447	-0.94	447			56	-3.2	-0.930981	0.990405	-0.907981								-0.936886	-0.976199	-0.953519	-0.950967	-0.949299								-0.00410758	0.00299632	-0.00055563		1.03232	1.03073	1.03153
56_Benzene-MeNH2_NH-pi_2.00	-0.267291	448	-0.261	448			56	-3.2	-0.258496	0.990405	-0.251496								-0.264324	-0.297488	-0.267829	-0.267291	-0.266937								-0.00243549	0.000624301	-0.000905594		0.283773	0.284519	0.284146
57_Benzene-Peptide_NH-pi_0.90	-3.75648	449	-3.746	449			57	-5.26	-3.73181	0.996212	-3.55481								-3.52015	-3.73148	-3.7955	-3.75648	-3.7226								-0.0341401	0.0169539	-0.00859311		5.32832	5.33197	5.33015
57_Benzene-Peptide_NH-pi_0.95	-4.97835	450	-4.955	450			57	-5.26	-4.93623	0.996212	-4.77323								-4.78754	-4.964	-5.00996	-4.97835	-4.95077								-0.029986	0.0147047	-0.00764064		6.1708	6.17302	6.17191
57_Benzene-Peptide_NH-pi_1.00	-5.31335	451	-5.28	451	-5.26	0.996212	57	-5.26	-5.26	0.996212	-5.115								-5.15859	-5.30803	-5.33905	-5.31335	-5.29083								-0.0263161	0.0128977	-0.0067092		6.22918	6.23024	6.22971
57_Benzene-Peptide_NH-pi_1.05	-5.18284	452	-5.144	452			57	-5.26	-5.12452	0.996212	-4.99952								-5.05691	-5.18537	-5.20379	-5.18284	-5.1644								-0.0230844	0.011603	-0.00574069		5.8944	5.89513	5.89476
57_Benzene-Peptide_NH-pi_1.10	-4.82458	453	-4.782	453			57	-5.26	-4.76389	0.996212	-4.65689								-4.72181	-4.83396	-4.8417	-4.82458	-4.80946								-0.0201822	0.0103369	-0.00492267		5.38555	5.38524	5.38539
57_Benzene-Peptide_NH-pi_1.25	-3.45789	454	-3.414	454			57	-5.26	-3.40107	0.996212	-3.33907								-3.40097	-3.48233	-3.46739	-3.45789	-3.44942								-0.0126052	0.00779956	-0.00240281		3.75449	3.7525	3.75349
57_Benzene-Peptide_NH-pi_1.50	-1.83675	455	-1.803	455			57	-5.26	-1.79617	0.996212	-1.76917								-1.81347	-1.8733	-1.84064	-1.83675	-1.83325								-0.00600463	0.00420795	-0.00089834		1.95949	1.95766	1.95857
57_Benzene-Peptide_NH-pi_2.00	-0.632287	456	-0.618	456			57	-5.26	-0.615659	0.996212	-0.611659								-0.626892	-0.677143	-0.63319	-0.632287	-0.631473								-0.00346186	0.00109251	-0.00118468		0.662261	0.662588	0.662424
58_Pyridine-Pyridine_CH-N_0.90	-2.98855	457	-2.804	457			58	-4.24	-2.86757	1.02267	-2.75057								-2.85451	-2.94025	-3.00935	-2.98855	-2.97132								-0.00602723	0.0144533	0.00421306		3.31893	3.31439	3.31666
58_Pyridine-Pyridine_CH-N_0.95	-3.9696	458	-3.819	458			58	-4.24	-3.90559	1.02267	-3.79959								-3.85905	-3.92674	-3.98679	-3.9696	-3.95534								-0.00408808	0.0129398	0.00442588		4.18729	4.18181	4.18455
58_Pyridine-Pyridine_CH-N_1.00	-4.25883	459	-4.146	459	-4.24	1.02267	58	-4.24	-4.24	1.02267	-4.144								-4.17464	-4.22292	-4.27195	-4.25883	-4.24792								-0.00204935	0.0113807	0.00466567		4.38084	4.37545	4.37814
58_Pyridine-Pyridine_CH-N_1.05	-3.97335	460	-3.885	460			58	-4.24	-3.97308	1.02267	-3.88408								-3.90797	-3.94292	-3.98355	-3.97335	-3.96485								-0.00084914	0.0101148	0.00463281		4.04662	4.04197	4.04429
58_Pyridine-Pyridine_CH-N_1.10	-3.51736	461	-3.446	461			58	-4.24	-3.52413	1.02267	-3.44313								-3.46571	-3.49123	-3.52542	-3.51736	-3.51062								-0.000124331	0.00904652	0.0044611		3.5647	3.56111	3.56291
58_Pyridine-Pyridine_CH-N_1.25	-2.22589	462	-2.181	462			58	-4.24	-2.23045	1.02267	-2.17545								-2.19817	-2.20809	-2.23022	-2.22589	-2.22225								0.000252465	0.00597942	0.00311594		2.24567	2.24399	2.24483
58_Pyridine-Pyridine_CH-N_1.50	-1.04091	463	-1.01	463			58	-4.24	-1.0329	1.02267	-1.0009								-1.02871	-1.02984	-1.04281	-1.04091	-1.0393								-0.0002381	0.00307398	0.00141794		1.04723	1.04709	1.04716
58_Pyridine-Pyridine_CH-N_2.00	-0.287246	464	-0.275	464			58	-4.24	-0.281235	1.02267	-0.270235								-0.283796	-0.283327	-0.287785	-0.287246	-0.286789								-0.000411776	0.00104961	0.000318916		0.288771	0.289036	0.288903
59_Ethyne-Water_CH-O_0.90	-2.60809	465	-2.515	465			59	-2.93	-2.58832	1.02915	-2.55532								-2.57312	-2.69632	-2.61326	-2.60809	-2.60156								-0.00339924	0.00979004	0.0031954		2.5953	2.58586	2.59058
59_Ethyne-Water_CH-O_0.95	-2.87259	466	-2.797	466			59	-2.93	-2.87854	1.02915	-2.84754								-2.84391	-2.96077	-2.87683	-2.87259	-2.86723								-0.00352906	0.0082918	0.00238137		2.84868	2.83973	2.84421
59_Ethyne-Water_CH-O_1.00	-2.90708	467	-2.847	467	-2.93	1.02915	59	-2.93	-2.93	1.02915	-2.9								-2.88369	-2.99551	-2.91055	-2.90708	-2.90271								-0.0036231	0.00709154	0.00173422		2.87986	2.87157	2.87572
59_Ethyne-Water_CH-O_1.05	-2.80691	468	-2.759	468			59	-2.93	-2.83943	1.02915	-2.81143								-2.78792	-2.8957	-2.80973	-2.80691	-2.80336								-0.00369657	0.00610069	0.00120206		2.78076	2.77323	2.77699
59_Ethyne-Water_CH-O_1.10	-2.6342	469	-2.596	469			59	-2.93	-2.67168	1.02915	-2.64468								-2.61882	-2.72336	-2.63648	-2.6342	-2.63132								-0.00377144	0.00526773	0.000748145		2.61119	2.60446	2.60783
59_Ethyne-Water_CH-O_1.25	-2.00295	470	-1.981	470			59	-2.93	-2.03875	1.02915	-2.01475								-1.99472	-2.09271	-2.00417	-2.00295	-2.0014								-0.00390198	0.00343541	-0.000233283		1.9904	1.98594	1.98817
59_Ethyne-Water_CH-O_1.50	-1.18234	471	-1.169	471			59	-2.93	-1.20308	1.02915	-1.18508								-1.17896	-1.27197	-1.18284	-1.18234	-1.1817								-0.00344954	0.00186922	-0.00079016		1.17831	1.17626	1.17729
59_Ethyne-Water_CH-O_2.00	-0.461369	472	-0.458	472			59	-2.93	-0.471352	1.02915	-0.462352								-0.460801	-0.551578	-0.461454	-0.461369	-0.461262								-0.0022679	0.000677147	-0.000795377		0.463737	0.463348	0.463542
60_Ethyne-AcOH_OH-pi_0.90	-4.36371	473	-4.284	473			60	-4.97	-4.38096	1.02263	-4.37996								-4.26113	-4.42007	-4.37862	-4.36371	-4.34259								-0.0316686	0.0116518	-0.0100084		4.61564	4.60821	4.61192
60_Ethyne-AcOH_OH-pi_0.95	-4.84398	474	-4.781	474			60	-4.97	-4.88921	1.02263	-4.88421								-4.75894	-4.89973	-4.85636	-4.84398	-4.82646								-0.0285753	0.0106215	-0.00897693		5.01497	5.00733	5.01115
60_Ethyne-AcOH_OH-pi_1.00	-4.90792	475	-4.86	475	-4.97	1.02263	60	-4.97	-4.97	1.02263	-4.962								-4.83756	-4.96332	-4.91818	-4.90792	-4.89342								-0.0257342	0.00976618	-0.00798399		5.02378	5.01615	5.01997
60_Ethyne-AcOH_OH-pi_1.05	-4.72711	476	-4.693	476			60	-4.97	-4.79922	1.02263	-4.78722								-4.66901	-4.78221	-4.73559	-4.72711	-4.71513								-0.0231238	0.00903836	-0.00704271		4.80567	4.79823	4.80195
60_Ethyne-AcOH_OH-pi_1.10	-4.41354	477	-4.39	477			60	-4.97	-4.48936	1.02263	-4.47336								-4.3656	-4.46832	-4.42053	-4.41354	-4.40364								-0.0207395	0.00843254	-0.00615349		4.46693	4.45985	4.46339
60_Ethyne-AcOH_OH-pi_1.25	-3.26262	478	-3.255	478			60	-4.97	-3.32867	1.02263	-3.31167								-3.23561	-3.31612	-3.26657	-3.26262	-3.25704								-0.0147607	0.00741131	-0.0036747		3.27809	3.27305	3.27557
60_Ethyne-AcOH_OH-pi_1.50	-1.77638	479	-1.772	479			60	-4.97	-1.81211	1.02263	-1.78711								-1.76549	-1.8283	-1.77797	-1.77638	-1.77413								-0.0070104	0.00641795	-0.000296226		1.77593	1.77272	1.77433
60_Ethyne-AcOH_OH-pi_2.00	-0.559371	480	-0.557	480			60	-4.97	-0.569607	1.02263	-0.548607								-0.557363	-0.611092	-0.559665	-0.559371	-0.558956								-0.00134042	0.00234481	0.000502193		0.55959	0.557085	0.558338
61_Pentane-AcOH_0.90	-2.74138	481	-2.7	481			61	-2.91	-2.72907	1.01077	-2.59107								-2.58624	-2.69841	-2.77029	-2.74138	-2.71658								-0.00884224	0.0147024	0.00293006		2.90901	2.88926	2.89914
61_Pentane-AcOH_0.95	-2.93781	482	-2.901	482			61	-2.91	-2.93224	1.01077	-2.80424								-2.80579	-2.89818	-2.96244	-2.93781	-2.91662								-0.00755182	0.0133671	0.00290766		3.05752	3.03891	3.04822
61_Pentane-AcOH_1.00	-2.91301	483	-2.879	483	-2.91	1.01077	61	-2.91	-2.91	1.01077	-2.795								-2.80066	-2.87642	-2.93399	-2.91301	-2.89491								-0.00648295	0.0120735	0.00279525		2.99945	2.98198	2.99071
61_Pentane-AcOH_1.05	-2.76125	484	-2.73	484			61	-2.91	-2.7594	1.01077	-2.6544								-2.66562	-2.72739	-2.77911	-2.76125	-2.74578								-0.00557509	0.0108941	0.00265951		2.82441	2.80823	2.81632
61_Pentane-AcOH_1.10	-2.5436	485	-2.515	485			61	-2.91	-2.54208	1.01077	-2.44508								-2.46215	-2.51219	-2.55882	-2.5436	-2.53038								-0.0047821	0.00980427	0.00251109		2.5907	2.57578	2.58324
61_Pentane-AcOH_1.25	-1.81196	486	-1.788	486			61	-2.91	-1.80725	1.01077	-1.74025								-1.76115	-1.78622	-1.82145	-1.81196	-1.80365								-0.00285112	0.00706831	0.00210859		1.83498	1.82342	1.8292
61_Pentane-AcOH_1.50	-0.802397	487	-0.784	487			61	-2.91	-0.792442	1.01077	-0.757442								-0.781182	-0.783038	-0.806362	-0.802397	-0.798901								-0.0010919	0.00379139	0.00134975		0.810651	0.80535	0.808001
61_Pentane-AcOH_2.00	-0.177279	488	-0.168	488			61	-2.91	-0.169809	1.01077	-0.157809								-0.172079	-0.163263	-0.178252	-0.177279	-0.176418								-0.00083723	0.000866303	1.45366e-05		0.178248	0.177091	0.177669
62_Pentane-AcNH2_0.90	-3.19348	489	-3.152	489			62	-3.53	-3.17448	1.00713	-3.02748								-3.00849	-3.14762	-3.22962	-3.19348	-3.1686								-0.0161661	0.0166711	0.000252499		3.40779	3.39156	3.39967
62_Pentane-AcNH2_0.95	-3.53833	490	-3.501	490			62	-3.53	-3.52597	1.00713	-3.38797								-3.38349	-3.49651	-3.56862	-3.53833	-3.51736								-0.0139315	0.0151428	0.000605647		3.67674	3.66099	3.66887
62_Pentane-AcNH2_1.00	-3.53992	491	-3.505	491	-3.53	1.00713	62	-3.53	-3.53	1.00713	-3.401								-3.4102	-3.50169	-3.56532	-3.53992	-3.52224								-0.0120312	0.0136838	0.000826325		3.62906	3.61388	3.62147
62_Pentane-AcNH2_1.05	-3.35251	492	-3.321	492			62	-3.53	-3.34469	1.00713	-3.22469								-3.24372	-3.3174	-3.37381	-3.35251	-3.33759								-0.010452	0.0122927	0.000920362		3.40995	3.3955	3.40272
62_Pentane-AcNH2_1.10	-3.07219	493	-3.043	493			62	-3.53	-3.0647	1.00713	-2.9547								-2.9808	-3.03977	-3.0901	-3.07219	-3.05961								-0.00911774	0.0110072	0.000944726		3.10957	3.09593	3.10275
62_Pentane-AcNH2_1.25	-2.14015	494	-2.116	494			62	-3.53	-2.13109	1.00713	-2.04809								-2.0851	-2.11369	-2.15094	-2.14015	-2.13249								-0.00588454	0.0079018	0.00100863		2.15293	2.14194	2.14743
62_Pentane-AcNH2_1.50	-1.06071	495	-1.043	495			62	-3.53	-1.05044	1.00713	-0.994439								-1.03541	-1.0401	-1.06567	-1.06071	-1.05716								-0.00285109	0.00480033	0.000974623		1.06708	1.06134	1.06421
62_Pentane-AcNH2_2.00	-0.283102	496	-0.273	496			62	-3.53	-0.274947	1.00713	-0.238947								-0.276205	-0.267892	-0.284455	-0.283102	-0.282126								-0.0016673	0.0013525	-0.000157402		0.284359	0.283035	0.283697
63_Benzene-AcOH_0.90	-2.69145	497	-2.734	497			63	-3.75	-2.69732	0.986582	-2.50832								-2.48921	-2.72065	-2.72212	-2.69145	-2.65605								-0.0248862	0.0201633	-0.00236145		4.02043	4.00919	4.01481
63_Benzene-AcOH_0.95	-3.58124	498	-3.6	498			63	-3.75	-3.5517	0.986582	-3.3807								-3.41802	-3.61774	-3.60606	-3.58124	-3.55253								-0.0209716	0.0186067	-0.00118243		4.58984	4.57922	4.58453
63_Benzene-AcOH_1.00	-3.79787	499	-3.801	499	-3.75	0.986582	63	-3.75	-3.75	0.986582	-3.599								-3.66577	-3.8411	-3.81801	-3.79787	-3.77454								-0.0179188	0.0170789	-0.000419932		4.56969	4.5599	4.5648
63_Benzene-AcOH_1.05	-3.6603	500	-3.652	500			63	-3.75	-3.603	0.986582	-3.475								-3.55318	-3.70967	-3.67666	-3.6603	-3.64131								-0.0153657	0.0155498	9.20409e-05		4.2565	4.2474	4.25195
63_Benzene-AcOH_1.10	-3.35425	501	-3.338	501			63	-3.75	-3.29321	0.986582	-3.18421								-3.26719	-3.40907	-3.36756	-3.35425	-3.33876								-0.0131673	0.0139908	0.000411733		3.81977	3.81125	3.81551
63_Benzene-AcOH_1.25	-2.26003	502	-2.236	502			63	-3.75	-2.206	0.986582	-2.141								-2.21246	-2.327	-2.26732	-2.26003	-2.2515								-0.00819618	0.00951897	0.000661395		2.49596	2.48828	2.49212
63_Benzene-AcOH_1.50	-1.04046	503	-1.02	503			63	-3.75	-1.00631	0.986582	-0.978314								-1.02167	-1.11701	-1.04334	-1.04046	-1.03707								-0.00516158	0.00415806	-0.000501758		1.12324	1.11905	1.12115
63_Benzene-AcOH_2.00	-0.27148	504	-0.262	504			63	-3.75	-0.258485	0.986582	-0.251485								-0.267116	-0.354861	-0.27215	-0.27148	-0.27069								-0.003436	0.000953517	-0.00124124		0.282655	0.28321	0.282933
64_Peptide-Ethene_0.90	-2.59879	505	-2.6	505			64	-3	-2.61044	1.00402	-2.53744								-2.47611	-2.58346	-2.62117	-2.59879	-2.57998								-0.0112433	0.0139439	0.00135034		2.8955	2.88408	2.88979
64_Peptide-Ethene_0.95	-2.95201	506	-2.949	506			64	-3	-2.96084	1.00402	-2.89384								-2.84964	-2.93831	-2.97071	-2.95201	-2.93626								-0.00935658	0.01307	0.00185672		3.17195	3.16101	3.16648
64_Peptide-Ethene_1.00	-2.99435	507	-2.988	507	-3	1.00402	64	-3	-3	1.00402	-2.939								-2.90897	-2.98227	-3.00996	-2.99435	-2.98117								-0.00784199	0.0121418	0.00214988		3.15969	3.14934	3.15451
64_Peptide-Ethene_1.05	-2.86193	508	-2.854	508			64	-3	-2.86546	1.00402	-2.80946								-2.79075	-2.85136	-2.87495	-2.86193	-2.85091								-0.0066833	0.0111356	0.00222616		2.98808	2.97843	2.98325
64_Peptide-Ethene_1.10	-2.64066	509	-2.631	509			64	-3	-2.64157	1.00402	-2.59057								-2.58129	-2.63143	-2.65153	-2.64066	-2.63144								-0.00581276	0.0100905	0.00213885		2.73836	2.72944	2.7339
64_Peptide-Ethene_1.25	-1.8687	510	-1.856	510			64	-3	-1.86345	1.00402	-1.82545								-1.83382	-1.86244	-1.87509	-1.8687	-1.86325								-0.0039218	0.00726521	0.0016717		1.91722	1.91027	1.91375
64_Peptide-Ethene_1.50	-0.8899	511	-0.877	511			64	-3	-0.880522	1.00402	-0.858522								-0.875357	-0.886787	-0.892568	-0.8899	-0.887617								-0.00173964	0.00400786	0.00113411		0.905924	0.901767	0.903846
64_Peptide-Ethene_2.00	-0.193792	512	-0.189	512			64	-3	-0.189759	1.00402	-0.181759								-0.191096	-0.194517	-0.194287	-0.193792	-0.193367								-0.00126856	0.000645758	-0.000311402		0.195444	0.194878	0.195161
65_Pyridine-Ethyne_0.90	-3.70059	513	-3.535	513			65	-4.1	-3.63246	1.02757	-3.55746								-3.63572	-3.67776	-3.71095	-3.70059	-3.69312								0.000488671	0.0157291	0.00810888		3.8919	3.89048	3.89119
65_Pyridine-Ethyne_0.95	-4.04799	514	-3.91	514			65	-4.1	-4.01779	1.02757	-3.94979								-3.99321	-4.02716	-4.05675	-4.04799	-4.04166								0.000542627	0.013822	0.00718233		4.18808	4.18638	4.18723
65_Pyridine-Ethyne_1.00	-4.10364	515	-3.99	515	-4.1	1.02757	65	-4.1	-4.1	1.02757	-4.038								-4.0575	-4.0849	-4.11102	-4.10364	-4.09829								0.000649209	0.0122284	0.00643882		4.20919	4.20735	4.20827
65_Pyridine-Ethyne_1.05	-3.98042	516	-3.887	516			65	-4.1	-3.99416	1.02757	-3.93716								-3.94165	-3.96371	-3.98664	-3.98042	-3.97592								0.000767552	0.0108907	0.00582914		4.06304	4.06119	4.06211
65_Pyridine-Ethyne_1.10	-3.75493	517	-3.679	517			65	-4.1	-3.78043	1.02757	-3.72743								-3.72236	-3.74001	-3.76015	-3.75493	-3.75114								0.000852397	0.00971434	0.00528337		3.82249	3.82059	3.82154
65_Pyridine-Ethyne_1.25	-2.88766	518	-2.843	518			65	-4.1	-2.92138	1.02757	-2.87938								-2.86822	-2.8765	-2.89078	-2.88766	-2.88539								0.000908155	0.00707578	0.00399197		2.93227	2.93104	2.93166
65_Pyridine-Ethyne_1.50	-1.69428	519	-1.67	519			65	-4.1	-1.71604	1.02757	-1.68804								-1.6856	-1.68621	-1.69568	-1.69428	-1.69326								0.000676507	0.00413247	0.00240449		1.72486	1.72444	1.72465
65_Pyridine-Ethyne_2.00	-0.627307	520	-0.616	520			65	-4.1	-0.632982	1.02757	-0.620982								-0.625181	-0.62234	-0.627649	-0.627307	-0.627057								0.000245612	0.00156387	0.00090474		0.643211	0.643332	0.643271
66_MeNH2-Pyridine_0.90	-3.43499	521	-3.445	521			66	-3.97	-3.44847	1.00101	-3.37747								-3.28711	-3.4274	-3.46008	-3.43499	-3.41606								-0.0151973	0.0164194	0.000611049		4.33271	4.33089	4.3318
66_MeNH2-Pyridine_0.95	-3.87	522	-3.875	522			66	-3.97	-3.87891	1.00101	-3.81091								-3.74542	-3.86603	-3.89118	-3.87	-3.85397								-0.0126781	0.0153106	0.00131626		4.58967	4.587	4.58834
66_MeNH2-Pyridine_1.00	-3.96422	523	-3.966	523	-3.97	1.00101	66	-3.97	-3.97	1.00101	-3.906								-3.85913	-3.96351	-3.98212	-3.96422	-3.95064								-0.0105244	0.0142507	0.00186313		4.54542	4.54211	4.54376
66_MeNH2-Pyridine_1.05	-3.85203	524	-3.85	524			66	-3.97	-3.85388	1.00101	-3.79488								-3.76332	-3.85424	-3.86716	-3.85203	-3.84052								-0.00875757	0.0131855	0.00221398		4.3249	4.32117	4.32304
66_MeNH2-Pyridine_1.10	-3.62322	525	-3.618	525			66	-3.97	-3.62165	1.00101	-3.56565								-3.54823	-3.62804	-3.63602	-3.62322	-3.61346								-0.00734809	0.012103	0.00237744		4.01122	4.00726	4.00924
66_MeNH2-Pyridine_1.25	-2.72364	526	-2.713	526			66	-3.97	-2.71574	1.00101	-2.67174								-2.67798	-2.73469	-2.73145	-2.72364	-2.71765								-0.00469787	0.00889095	0.00209654		2.94896	2.94507	2.94702
66_MeNH2-Pyridine_1.50	-1.51634	527	-1.503	527			66	-3.97	-1.50452	1.00101	-1.47552								-1.49545	-1.53364	-1.51992	-1.51634	-1.51358								-0.00319569	0.00481382	0.000809065		1.61937	1.61725	1.61831
66_MeNH2-Pyridine_2.00	-0.502315	528	-0.494	528			66	-3.97	-0.494498	1.00101	-0.480498								-0.497013	-0.525487	-0.503224	-0.502315	-0.501608								-0.0017063	0.00134589	-0.000180208		0.53182	0.531717	0.531768

## Sheet: HLC-F12c
everything here cc-pVDZ-F12
													1.1413
					1.15		1.15
	0.3333	0.6222			0.75		0.75
		0.883333
													RMSD relative to HLC(Tb)sc		0.113457	0.0457194	0.0183099	0	0.0190452
													RMSD relative to HLC(T*)sc		0.131528	0.057117	0	0.0183099	0.0364227
													RMSD relative to HLC(Ts)		0.0953956	0.0416561	0.0364227	0.0190452	0																			monomerA									monomerB
																										Dimers
	HF+CABS			MP2-F12		CCSD-F12c	CCSD(T)-F12c	CCSD(T*)-F12c	(T)	(T*)	(T*)sc	(Tc)sc	(Ts)		HLC(T)	HLC(T*)	HLC(T*)sc	HLC(Tc)sc	HLC(Ts)				Tc ratio dimer			HF+CABS				MP2-F12	CCSD-F12c	CCSD(T)-F12c	CCSD(T*)-F12c	(T*) ratio				HF+CABS			MP2-F12	CCSD-F12c	CCSD(T)-F12c	CCSD(T*)-F12c	(T*) ratio		HF+CABS
01_Water-Water_0.90	2.94821			4.77184		4.41821	4.70079	4.76059	0.282578	0.342382	0.346334	0.339413	0.322506		-0.071045	-0.0112409	-0.0072887	-0.01421	-0.0311167				1.20113		01_Water-Water_0.90	-152.127				-152.722	-152.711	-152.725	-152.728	1.22562		01_Water-Water_0.90		-76.0613			-76.3573	-76.3519	-76.3587	-76.3602	1.22599		-76.0615
01_Water-Water_0.95	3.55401			5.04398		4.76577	5.00611	5.0562	0.240334	0.290423	0.294554	0.288656	0.274294		-0.0378664	0.0122219	0.0163536	0.0104552	-0.00390716				1.20106		01_Water-Water_0.95	-152.128				-152.723	-152.711	-152.725	-152.729	1.2256		01_Water-Water_0.95		-76.0613			-76.3573	-76.3519	-76.3587	-76.3602	1.22599		-76.0615
01_Water-Water_1.00	3.81345			5.02753		4.80778	5.01033	5.05212	0.202549	0.244344	0.248249	0.243267	0.231169		-0.0172062	0.0245888	0.0284946	0.0235121	0.0114139				1.20103		01_Water-Water_1.00	-152.129				-152.723	-152.711	-152.725	-152.729	1.22563		01_Water-Water_1.00		-76.0613			-76.3573	-76.3519	-76.3587	-76.3602	1.22599		-76.0615
01_Water-Water_1.05	3.85204			4.83848		4.66368	4.83279	4.86754	0.169113	0.203859	0.207279	0.203113	0.193009		-0.0056899	0.0290566	0.0324765	0.0283103	0.0182058				1.20105		01_Water-Water_1.05	-152.129				-152.722	-152.711	-152.725	-152.728	1.22569		01_Water-Water_1.05		-76.0613			-76.3573	-76.3519	-76.3587	-76.3602	1.22599		-76.0615
01_Water-Water_1.10	3.75391			4.55384		4.4134	4.55344	4.58224	0.140045	0.168845	0.171661	0.168207	0.159834		-0.000396656	0.0284032	0.0312195	0.027765	0.0193917				1.20109		01_Water-Water_1.10	-152.129				-152.722	-152.711	-152.725	-152.728	1.22576		01_Water-Water_1.10		-76.0613			-76.3573	-76.3519	-76.3587	-76.3602	1.22599		-76.0615
01_Water-Water_1.25	3.12109			3.54263		3.46479	3.54102	3.55709	0.0762234	0.092294	0.0934462	0.0915633	0.0869937		-0.00161275	0.0144579	0.0156101	0.0137272	0.00915761				1.20125		01_Water-Water_1.25	-152.128				-152.72	-152.709	-152.723	-152.726	1.22595		01_Water-Water_1.25		-76.0613			-76.3573	-76.3519	-76.3587	-76.3602	1.22599		-76.0615
01_Water-Water_1.50	2.04647			2.18439		2.1483	2.17311	2.17865	0.0248056	0.030352	0.0304136	0.0298004	0.0283106		-0.0112801	-0.00573368	-0.005672	-0.0062852	-0.00777503				1.20136		01_Water-Water_1.50	-152.126				-152.718	-152.707	-152.721	-152.724	1.22608		01_Water-Water_1.50		-76.0613			-76.3573	-76.3519	-76.3587	-76.3602	1.22599		-76.0615
01_Water-Water_2.00	0.918297			0.919081		0.907259	0.907812	0.908143	0.00055253	0.00088433	0.000677463	0.000663793	0.000630602		-0.0112693	-0.0109375	-0.0111444	-0.0111581	-0.0111913				1.20137		01_Water-Water_2.00	-152.124				-152.716	-152.705	-152.719	-152.722	1.22611		01_Water-Water_2.00		-76.0613			-76.3573	-76.3519	-76.3587	-76.3602	1.22599		-76.0615
02_Water-MeOH_0.90	2.8134			5.46814		4.92432	5.29988	5.37901	0.375561	0.454693	0.457521	0.446782	0.428628		-0.168265	-0.0891328	-0.0863049	-0.0970434	-0.115198				1.18964		02_Water-MeOH_0.90	-191.159				-191.939	-191.933	-191.953	-191.958	1.21823		02_Water-MeOH_0.90		-76.0612			-76.3573	-76.3519	-76.3587	-76.3602	1.22593		-115.093
02_Water-MeOH_0.95	3.54183			5.76547		5.32404	5.64861	5.71659	0.324564	0.39255	0.395394	0.386101	0.370425		-0.116858	-0.0488718	-0.0460277	-0.0553206	-0.070997				1.1896		02_Water-MeOH_0.95	-191.16				-191.939	-191.933	-191.954	-191.958	1.21823		02_Water-MeOH_0.95		-76.0612			-76.3573	-76.3519	-76.3587	-76.3602	1.22593		-115.093
02_Water-MeOH_1.00	3.88203			5.74028		5.38164	5.65984	5.71809	0.278194	0.336447	0.338914	0.330937	0.317503		-0.0804441	-0.0221916	-0.0197247	-0.0277012	-0.0411352				1.18959		02_Water-MeOH_1.00	-191.161				-191.939	-191.934	-191.954	-191.958	1.21826		02_Water-MeOH_1.00		-76.0612			-76.3573	-76.3519	-76.3587	-76.3602	1.22593		-115.093
02_Water-MeOH_1.05	3.97112			5.52085		5.22854	5.46511	5.51494	0.236565	0.286393	0.288211	0.281418	0.269992		-0.0557446	-0.00591646	-0.00409893	-0.0108919	-0.022318				1.1896		02_Water-MeOH_1.05	-191.161				-191.939	-191.933	-191.953	-191.958	1.21831		02_Water-MeOH_1.05		-76.0612			-76.3573	-76.3519	-76.3587	-76.3602	1.22593		-115.093
02_Water-MeOH_1.10	3.90171			5.19303		4.95341	5.15326	5.19587	0.199849	0.242458	0.243492	0.237747	0.228088		-0.0397739	0.00283431	0.00386885	-0.0018765	-0.0115352				1.18963		02_Water-MeOH_1.10	-191.161				-191.938	-191.933	-191.953	-191.957	1.21838		02_Water-MeOH_1.10		-76.0612			-76.3573	-76.3519	-76.3587	-76.3602	1.22593		-115.093
02_Water-MeOH_1.25	3.28086			4.02609		3.88849	4.00518	4.03192	0.116696	0.143437	0.142201	0.13884	0.133185		-0.0209039	0.00583709	0.00460139	0.00124029	-0.00441479				1.18976		02_Water-MeOH_1.25	-191.16				-191.936	-191.931	-191.951	-191.955	1.21856		02_Water-MeOH_1.25		-76.0612			-76.3573	-76.3519	-76.3587	-76.3602	1.22593		-115.093
02_Water-MeOH_1.50	2.15037			2.44964		2.38644	2.43078	2.44381	0.0443486	0.0573768	0.054049	0.0527699	0.050615		-0.0188525	-0.00582424	-0.00915203	-0.0104311	-0.012586				1.18989		02_Water-MeOH_1.50	-191.158				-191.934	-191.929	-191.949	-191.953	1.21873		02_Water-MeOH_1.50		-76.0612			-76.3573	-76.3519	-76.3587	-76.3602	1.22593		-115.093
02_Water-MeOH_2.00	0.944602			0.991062		0.972415	0.977532	0.983083	0.00511754	0.0106684	0.00623736	0.00608967	0.00584065		-0.0135297	-0.00797884	-0.0124098	-0.0125575	-0.0128065				1.18996		02_Water-MeOH_2.00	-191.156				-191.931	-191.927	-191.946	-191.951	1.21882		02_Water-MeOH_2.00		-76.0612			-76.3573	-76.3519	-76.3587	-76.3602	1.22593		-115.093
03_Water-MeNH2_0.90	3.63237			6.88483		6.13551	6.58623	6.68795	0.450725	0.552444	0.544408	0.530756	0.514413		-0.298596	-0.196877	-0.204913	-0.218566	-0.234909				1.17756		03_Water-MeNH2_0.90	-171.324				-172.073	-172.074	-172.094	-172.099	1.20785		03_Water-MeNH2_0.90		-76.0609			-76.3572	-76.3517	-76.3586	-76.3601	1.22569		-95.2568
03_Water-MeNH2_0.95	4.44459			7.1807		6.56396	6.95856	7.04846	0.3946	0.484505	0.476613	0.464634	0.450357		-0.222142	-0.132237	-0.140129	-0.152109	-0.166385				1.17748		03_Water-MeNH2_0.95	-171.325				-172.074	-172.075	-172.095	-172.099	1.20784		03_Water-MeNH2_0.95		-76.0609			-76.3572	-76.3517	-76.3586	-76.3601	1.22569		-95.2568
03_Water-MeNH2_1.00	4.82448			7.12329		6.61521	6.95838	7.03783	0.34317	0.42262	0.4145	0.404059	0.39166		-0.164903	-0.085454	-0.0935734	-0.104015	-0.116414				1.17743		03_Water-MeNH2_1.00	-171.325				-172.074	-172.075	-172.095	-172.099	1.20786		03_Water-MeNH2_1.00		-76.0609			-76.3572	-76.3517	-76.3586	-76.3601	1.22569		-95.2568
03_Water-MeNH2_1.05	4.91926			6.84869		6.42914	6.72565	6.79592	0.296509	0.366776	0.358153	0.349116	0.338406		-0.123039	-0.052772	-0.0613953	-0.070432	-0.0811419				1.17742		03_Water-MeNH2_1.05	-171.326				-172.073	-172.074	-172.095	-172.099	1.2079		03_Water-MeNH2_1.05		-76.0609			-76.3572	-76.3517	-76.3586	-76.3601	1.22569		-95.2568
03_Water-MeNH2_1.10	4.83045			6.45013		6.10213	6.35698	6.41926	0.25485	0.317129	0.307846	0.300065	0.29086		-0.0931568	-0.0308778	-0.0401607	-0.0479413	-0.0571465				1.17742		03_Water-MeNH2_1.10	-171.325				-172.073	-172.074	-172.094	-172.098	1.20795		03_Water-MeNH2_1.10		-76.0609			-76.3572	-76.3517	-76.3586	-76.3601	1.22569		-95.2568
03_Water-MeNH2_1.25	4.06644			5.02912		4.82365	4.98165	5.02591	0.158008	0.202264	0.190892	0.186054	0.180334		-0.0474668	-0.00321054	-0.0145824	-0.0194204	-0.0251403				1.1775		03_Water-MeNH2_1.25	-171.324				-172.07	-172.072	-172.092	-172.096	1.20812		03_Water-MeNH2_1.25		-76.0609			-76.3572	-76.3517	-76.3586	-76.3601	1.22569		-95.2568
03_Water-MeNH2_1.50	2.64577			3.06263		2.96534	3.03364	3.06166	0.0682979	0.0963136	0.0825253	0.080429	0.0779484		-0.0289903	-0.000974594	-0.0147629	-0.0168592	-0.0193398				1.17762		03_Water-MeNH2_1.50	-171.322				-172.067	-172.069	-172.089	-172.093	1.20831		03_Water-MeNH2_1.50		-76.0609			-76.3572	-76.3517	-76.3586	-76.3601	1.22569		-95.2568
03_Water-MeNH2_2.00	1.10778			1.2009		1.16802	1.1814	1.19975	0.0133821	0.0317309	0.0161717	0.0157604	0.015273		-0.019493	-0.00114427	-0.0167034	-0.0171148	-0.0176021				1.17772		03_Water-MeNH2_2.00	-171.32				-172.064	-172.066	-172.086	-172.09	1.20846		03_Water-MeNH2_2.00		-76.0609			-76.3572	-76.3517	-76.3586	-76.3601	1.22569		-95.2568
04_Water-Peptide_0.90	4.79172			7.76907		7.28726	7.74244	7.86432	0.45518	0.577063	0.549508	0.536862	0.519497		-0.0266292	0.0952539	0.0676986	0.0550528	0.0376877				1.17945		04_Water-Peptide_0.90	-323.175				-324.534	-324.52	-324.563	-324.573	1.20723		04_Water-Peptide_0.90		-76.061			-76.3573	-76.3518	-76.3586	-76.3601	1.22575		-247.106
04_Water-Peptide_0.95	5.60539			8.13996		7.7524	8.15571	8.26622	0.403307	0.513824	0.486876	0.475664	0.460294		0.0157419	0.126259	0.0993109	0.0880992	0.0727291				1.17941		04_Water-Peptide_0.95	-323.176				-324.534	-324.52	-324.564	-324.573	1.20721		04_Water-Peptide_0.95		-76.061			-76.3573	-76.3518	-76.3586	-76.3601	1.22575		-247.106
04_Water-Peptide_1.00	5.97461			8.12356		7.81424	8.16841	8.26874	0.354179	0.454499	0.427568	0.417715	0.404224		0.0448551	0.145175	0.118244	0.108391	0.0949006				1.17939		04_Water-Peptide_1.00	-323.176				-324.534	-324.52	-324.564	-324.573	1.20721		04_Water-Peptide_1.00		-76.061			-76.3573	-76.3518	-76.3586	-76.3601	1.22575		-247.106
04_Water-Peptide_1.05	6.05095			7.86572		7.62037	7.92877	8.02005	0.308407	0.399683	0.372316	0.363732	0.351985		0.0630558	0.154332	0.126965	0.118381	0.106634				1.17939		04_Water-Peptide_1.05	-323.177				-324.534	-324.52	-324.564	-324.573	1.20722		04_Water-Peptide_1.05		-76.061			-76.3573	-76.3518	-76.3586	-76.3601	1.22575		-247.106
04_Water-Peptide_1.10	5.93836			7.46642		7.27256	7.53922	7.62257	0.266663	0.350009	0.321929	0.314502	0.304342		0.0728003	0.156146	0.128066	0.12064	0.11048				1.1794		04_Water-Peptide_1.10	-323.176				-324.533	-324.52	-324.563	-324.572	1.20725		04_Water-Peptide_1.10		-76.061			-76.3573	-76.3518	-76.3586	-76.3601	1.22575		-247.106
04_Water-Peptide_1.25	5.08315			5.97877		5.8855	6.05186	6.11698	0.166356	0.231474	0.200849	0.19621	0.189862		0.0730842	0.138202	0.107577	0.102939	0.0965904				1.17946		04_Water-Peptide_1.25	-323.175				-324.531	-324.517	-324.561	-324.57	1.20735		04_Water-Peptide_1.25		-76.061			-76.3573	-76.3518	-76.3586	-76.3601	1.22575		-247.106
04_Water-Peptide_1.50	3.48554			3.82486		3.80187	3.87092	3.9189	0.0690573	0.117033	0.0833837	0.0814559	0.0788151		0.0460692	0.0940449	0.0603957	0.0584678	0.055827				1.17954		04_Water-Peptide_1.50	-323.172				-324.528	-324.514	-324.557	-324.566	1.20746		04_Water-Peptide_1.50		-76.061			-76.3573	-76.3518	-76.3586	-76.3601	1.22575		-247.106
04_Water-Peptide_2.00	1.45559			1.44585		1.45588	1.46142	1.49805	0.00553216	0.0421616	0.00668022	0.00652579	0.00631386		0.0155659	0.0521954	0.016714	0.0165596	0.0163476				1.17961		04_Water-Peptide_2.00	-323.169				-324.524	-324.51	-324.553	-324.562	1.20752		04_Water-Peptide_2.00		-76.061			-76.3573	-76.3518	-76.3586	-76.3601	1.22575		-247.106
05_MeOH-MeOH_0.90	2.41607			5.5203		4.89637	5.35849	5.44342	0.462122	0.547054	0.560887	0.546561	0.52742		-0.161806	-0.0768738	-0.0630411	-0.0773668	-0.0965079				1.18272		05_MeOH-MeOH_0.90	-230.191				-231.154	-231.154	-231.18	-231.186	1.21372		05_MeOH-MeOH_0.90		-115.093			-115.572	-115.573	-115.586	-115.589	1.21462		-115.094
05_MeOH-MeOH_0.95	3.25116			5.86894		5.36264	5.76459	5.83717	0.401954	0.474537	0.487873	0.475396	0.458751		-0.104355	-0.0317715	-0.0184365	-0.0309134	-0.0475583				1.18271		05_MeOH-MeOH_0.95	-230.192				-231.154	-231.155	-231.181	-231.187	1.21375		05_MeOH-MeOH_0.95		-115.093			-115.572	-115.573	-115.586	-115.589	1.21462		-115.094
05_MeOH-MeOH_1.00	3.67342			5.87741		5.46628	5.81358	5.87537	0.347298	0.409084	0.421551	0.410759	0.396371		-0.063828	-0.00204155	0.0104258	-0.000366305	-0.0147548				1.18273		05_MeOH-MeOH_1.00	-230.193				-231.154	-231.155	-231.181	-231.187	1.2138		05_MeOH-MeOH_1.00		-115.093			-115.572	-115.573	-115.586	-115.589	1.21462		-115.094
05_MeOH-MeOH_1.05	3.82532			5.67841		5.34362	5.64177	5.69419	0.298145	0.35057	0.36191	0.352634	0.340273		-0.0366434	0.0157813	0.0271221	0.0178455	0.00548445				1.18276		05_MeOH-MeOH_1.05	-230.193				-231.154	-231.155	-231.181	-231.186	1.21387		05_MeOH-MeOH_1.05		-115.093			-115.572	-115.573	-115.586	-115.589	1.21462		-115.094
05_MeOH-MeOH_1.10	3.80335			5.36111		5.08697	5.34161	5.38599	0.254638	0.299018	0.309118	0.301189	0.290619		-0.0195064	0.0248731	0.0349737	0.027044	0.016474				1.18281		05_MeOH-MeOH_1.10	-230.193				-231.154	-231.154	-231.18	-231.186	1.21395		05_MeOH-MeOH_1.10		-115.093			-115.572	-115.573	-115.586	-115.589	1.21462		-115.094
05_MeOH-MeOH_1.25	3.26274			4.18973		4.03288	4.18789	4.21444	0.155018	0.181564	0.188218	0.18338	0.176922		-0.00183448	0.0247111	0.0313649	0.0265277	0.0200696				1.18296		05_MeOH-MeOH_1.25	-230.192				-231.152	-231.152	-231.178	-231.184	1.21416		05_MeOH-MeOH_1.25		-115.093			-115.572	-115.573	-115.586	-115.589	1.21462		-115.094
05_MeOH-MeOH_1.50	2.16912			2.56783		2.49566	2.56129	2.57203	0.0656347	0.0763717	0.0797048	0.0776543	0.0749088		-0.00653231	0.0042047	0.0075378	0.00548737	0.00274187				1.18313		05_MeOH-MeOH_1.50	-230.19				-231.149	-231.15	-231.176	-231.181	1.21437		05_MeOH-MeOH_1.50		-115.093			-115.572	-115.573	-115.586	-115.589	1.21462		-115.094
05_MeOH-MeOH_2.00	0.961098			1.04096		1.01913	1.03156	1.03301	0.012432	0.0138859	0.0150987	0.0147099	0.0141886		-0.00939999	-0.00794602	-0.00673331	-0.00712207	-0.00764335				1.18323		05_MeOH-MeOH_2.00	-230.188				-231.147	-231.148	-231.173	-231.179	1.2145		05_MeOH-MeOH_2.00		-115.093			-115.572	-115.573	-115.586	-115.589	1.21462		-115.094
06_MeOH-MeNH2_0.90	2.75102			7.38223		6.36997	7.02346	7.14309	0.653489	0.773123	0.787495	0.766457	0.745826		-0.35877	-0.239136	-0.224763	-0.245801	-0.266432				1.17287		06_MeOH-MeNH2_0.90	-210.354				-211.289	-211.295	-211.322	-211.328	1.20506		06_MeOH-MeNH2_0.90		-115.093			-115.572	-115.573	-115.586	-115.588	1.2145		-95.2568
06_MeOH-MeNH2_0.95	3.85791			7.786		6.94787	7.52307	7.62743	0.575198	0.679563	0.693178	0.674616	0.656474		-0.262927	-0.158563	-0.144948	-0.16351	-0.181651				1.17284		06_MeOH-MeNH2_0.95	-210.356				-211.29	-211.296	-211.323	-211.328	1.20511		06_MeOH-MeNH2_0.95		-115.093			-115.572	-115.573	-115.586	-115.588	1.2145		-95.2568
06_MeOH-MeNH2_1.00	4.45153			7.77999		7.08604	7.58969	7.68047	0.503648	0.594431	0.606985	0.590694	0.574814		-0.190299	-0.0995163	-0.0869627	-0.103254	-0.119134				1.17283		06_MeOH-MeNH2_1.00	-210.357				-211.29	-211.296	-211.323	-211.329	1.20518		06_MeOH-MeNH2_1.00		-115.093			-115.572	-115.573	-115.586	-115.588	1.2145		-95.2568
06_MeOH-MeNH2_1.05	4.70047			7.51848		6.94316	7.3818	7.46058	0.438642	0.517425	0.528676	0.514461	0.500622		-0.136681	-0.0578982	-0.0466469	-0.0608617	-0.0747008				1.17285		06_MeOH-MeNH2_1.05	-210.357				-211.289	-211.296	-211.323	-211.328	1.20526		06_MeOH-MeNH2_1.05		-115.093			-115.572	-115.573	-115.586	-115.588	1.2145		-95.2568
06_MeOH-MeNH2_1.10	4.72134			7.10769		6.62912	7.00947	7.07774	0.380347	0.448622	0.458449	0.446105	0.43409		-0.0982266	-0.0299515	-0.0201245	-0.0324684	-0.0444836				1.17289		06_MeOH-MeNH2_1.10	-210.357				-211.289	-211.296	-211.322	-211.328	1.20534		06_MeOH-MeNH2_1.10		-115.093			-115.572	-115.573	-115.586	-115.588	1.2145		-95.2568
06_MeOH-MeNH2_1.25	4.12232			5.5785		5.29526	5.53829	5.58252	0.243032	0.287261	0.292998	0.285084	0.277372		-0.0402103	0.00401892	0.0097563	0.0018415	-0.0058699				1.17303		06_MeOH-MeNH2_1.25	-210.356				-211.286	-211.294	-211.32	-211.325	1.2056		06_MeOH-MeNH2_1.25		-115.093			-115.572	-115.573	-115.586	-115.588	1.2145		-95.2568
06_MeOH-MeNH2_1.50	2.74394			3.40416		3.27131	3.3834	3.40523	0.112094	0.133915	0.135171	0.131511	0.127933		-0.0207521	0.00106854	0.00232503	-0.00133525	-0.00491328				1.17322		06_MeOH-MeNH2_1.50	-210.354				-211.283	-211.29	-211.316	-211.322	1.20587		06_MeOH-MeNH2_1.50		-115.093			-115.572	-115.573	-115.586	-115.588	1.2145		-95.2568
06_MeOH-MeNH2_2.00	1.16148			1.32413		1.28083	1.30762	1.31509	0.0267849	0.0342563	0.0323046	0.0314289	0.0305697		-0.0165137	-0.00904233	-0.010994	-0.0118697	-0.012729				1.17338		06_MeOH-MeNH2_2.00	-210.351				-211.279	-211.287	-211.313	-211.318	1.20607		06_MeOH-MeNH2_2.00		-115.093			-115.572	-115.573	-115.586	-115.588	1.2145		-95.2568
07_MeOH-Peptide_0.90	3.90213			7.73345		7.07676	7.7109	7.84183	0.634137	0.765063	0.764527	0.74591	0.72374		-0.0225479	0.108379	0.107843	0.0892251	0.0670556				1.17626		07_MeOH-Peptide_0.90	-362.205				-363.749	-363.74	-363.791	-363.801	1.20562		07_MeOH-Peptide_0.90		-115.093			-115.572	-115.573	-115.586	-115.588	1.21454		-247.106
07_MeOH-Peptide_0.95	4.87941			8.19117		7.65005	8.21724	8.33436	0.567195	0.684311	0.683821	0.667158	0.64734		0.0260687	0.143185	0.142694	0.126031	0.106213				1.17624		07_MeOH-Peptide_0.95	-362.207				-363.75	-363.741	-363.791	-363.802	1.20562		07_MeOH-Peptide_0.95		-115.093			-115.572	-115.573	-115.586	-115.588	1.21454		-247.106
07_MeOH-Peptide_1.00	5.37536			8.23173		7.78744	8.29156	8.39623	0.504125	0.608792	0.607791	0.592967	0.575358		0.0598322	0.164498	0.163498	0.148674	0.131065				1.17623		07_MeOH-Peptide_1.00	-362.208				-363.75	-363.742	-363.792	-363.802	1.20563		07_MeOH-Peptide_1.00		-115.093			-115.572	-115.573	-115.586	-115.588	1.21454		-247.106
07_MeOH-Peptide_1.05	5.54968			8.00843		7.64421	8.08958	8.18313	0.445368	0.538926	0.536965	0.523864	0.508299		0.0811498	0.174707	0.172747	0.159646	0.14408				1.17625		07_MeOH-Peptide_1.05	-362.208				-363.749	-363.741	-363.791	-363.801	1.20567		07_MeOH-Peptide_1.05		-115.093			-115.572	-115.573	-115.586	-115.588	1.21454		-247.106
07_MeOH-Peptide_1.10	5.51218			7.62667		7.32777	7.71931	7.80305	0.391548	0.475283	0.472092	0.460566	0.446874		0.092648	0.176383	0.173192	0.161666	0.147974				1.17627		07_MeOH-Peptide_1.10	-362.208				-363.749	-363.741	-363.791	-363.801	1.20571		07_MeOH-Peptide_1.10		-115.093			-115.572	-115.573	-115.586	-115.588	1.21454		-247.106
07_MeOH-Peptide_1.25	4.79135			6.1315		5.96399	6.2243	6.28496	0.260305	0.320967	0.313884	0.306212	0.297086		0.0927962	0.153458	0.146375	0.138704	0.129577				1.17636		07_MeOH-Peptide_1.25	-362.207				-363.746	-363.739	-363.788	-363.798	1.20583		07_MeOH-Peptide_1.25		-115.093			-115.572	-115.573	-115.586	-115.588	1.21454		-247.106
07_MeOH-Peptide_1.50	3.06576			3.61606		3.55747	3.6707	3.7059	0.113221	0.148424	0.136544	0.133204	0.12922		0.0546357	0.0898383	0.0779579	0.0746182	0.0706339				1.17649		07_MeOH-Peptide_1.50	-362.204				-363.742	-363.735	-363.784	-363.794	1.20599		07_MeOH-Peptide_1.50		-115.093			-115.572	-115.573	-115.586	-115.588	1.21454		-247.106
07_MeOH-Peptide_2.00	1.04093			1.09673		1.09193	1.10842	1.1277	0.0164893	0.0357743	0.0198881	0.0194015	0.0188193		0.0116841	0.030969	0.0150828	0.0145962	0.014014				1.17661		07_MeOH-Peptide_2.00	-362.201				-363.738	-363.731	-363.78	-363.79	1.20612		07_MeOH-Peptide_2.00		-115.093			-115.572	-115.573	-115.586	-115.588	1.21454		-247.106
08_MeOH-Water_0.90	2.58191			4.77897		4.35513	4.70977	4.78324	0.354637	0.428113	0.432061	0.421886	0.404747		-0.0691992	0.00427695	0.00822523	-0.00194947	-0.0190891				1.18963		08_MeOH-Water_0.90	-191.159				-191.937	-191.932	-191.952	-191.957	1.21832		08_MeOH-Water_0.90		-115.093			-115.572	-115.573	-115.586	-115.589	1.21466		-76.0615
08_MeOH-Water_0.95	3.28762			5.10101		4.76686	5.07147	5.13426	0.304617	0.367398	0.371127	0.362373	0.34766		-0.0295362	0.0332444	0.0369734	0.0282193	0.0135062				1.1896		08_MeOH-Water_0.95	-191.16				-191.938	-191.933	-191.953	-191.957	1.21834		08_MeOH-Water_0.95		-115.093			-115.572	-115.573	-115.586	-115.589	1.21466		-76.0615
08_MeOH-Water_1.00	3.62316			5.11745		4.85304	5.11279	5.16645	0.25975	0.313403	0.316477	0.308998	0.296452		-0.00465532	0.048998	0.0520718	0.0445932	0.0320473				1.1896		08_MeOH-Water_1.00	-191.161				-191.938	-191.933	-191.953	-191.957	1.21839		08_MeOH-Water_1.00		-115.093			-115.572	-115.573	-115.586	-115.589	1.21466		-76.0615
08_MeOH-Water_1.05	3.71918			4.94861		4.73799	4.95787	5.00376	0.219882	0.265773	0.267919	0.261581	0.250951		0.00925846	0.0551491	0.0572954	0.0509569	0.0403278				1.18964		08_MeOH-Water_1.05	-191.161				-191.938	-191.933	-191.952	-191.957	1.21847		08_MeOH-Water_1.05		-115.093			-115.572	-115.573	-115.586	-115.589	1.21466		-76.0615
08_MeOH-Water_1.10	3.66388			4.67484		4.50544	4.69046	4.72979	0.185026	0.224349	0.225464	0.220126	0.211171		0.0156217	0.0549444	0.0560593	0.0507212	0.0417659				1.1897		08_MeOH-Water_1.10	-191.161				-191.937	-191.932	-191.952	-191.956	1.21855		08_MeOH-Water_1.10		-115.093			-115.572	-115.573	-115.586	-115.589	1.21466		-76.0615
08_MeOH-Water_1.25	3.10241			3.66371		3.5696	3.677	3.7021	0.107398	0.132497	0.130893	0.12779	0.122573		0.0132833	0.0383831	0.0367788	0.033676	0.0284586				1.18988		08_MeOH-Water_1.25	-191.16				-191.936	-191.931	-191.95	-191.955	1.21877		08_MeOH-Water_1.25		-115.093			-115.572	-115.573	-115.586	-115.589	1.21466		-76.0615
08_MeOH-Water_1.50	2.06013			2.27224		2.22811	2.27042	2.28329	0.0423076	0.0551766	0.0515701	0.0503473	0.0482856		-0.00181636	0.0110527	0.0074462	0.00622335	0.0041617				1.19003		08_MeOH-Water_1.50	-191.158				-191.933	-191.929	-191.948	-191.953	1.21893		08_MeOH-Water_1.50		-115.093			-115.572	-115.573	-115.586	-115.589	1.21466		-76.0615
08_MeOH-Water_2.00	0.930518			0.956694		0.941388	0.94837	0.954435	0.00698171	0.013047	0.00851077	0.0083088	0.00796823		-0.00832391	-0.00225867	-0.00679485	-0.00699683	-0.0073374				1.19008		08_MeOH-Water_2.00	-191.156				-191.931	-191.926	-191.946	-191.95	1.21901		08_MeOH-Water_2.00		-115.093			-115.572	-115.573	-115.586	-115.589	1.21466		-76.0615
09_MeNH2-MeOH_0.90	0.0286466			2.90158		2.42237	2.83517	2.90737	0.412805	0.485007	0.497538	0.484142	0.471135		-0.0664091	0.00579273	0.0183231	0.00492775	-0.00807975				1.17281		09_MeNH2-MeOH_0.90	-210.35				-211.282	-211.289	-211.316	-211.321	1.20526		09_MeNH2-MeOH_0.90		-95.2568			-95.7049	-95.7124	-95.7253	-95.7279	1.19749		-115.094
09_MeNH2-MeOH_0.95	0.740794			3.09636		2.71628	3.06189	3.12233	0.345609	0.406047	0.416591	0.405358	0.394443		-0.0344685	0.0259698	0.0365135	0.0252803	0.014366				1.17288		09_MeNH2-MeOH_0.95	-210.351				-211.282	-211.29	-211.316	-211.322	1.20538		09_MeNH2-MeOH_0.95		-95.2568			-95.7049	-95.7124	-95.7253	-95.7279	1.19749		-115.094
09_MeNH2-MeOH_1.00	1.13468			3.0707		2.76655	3.05526	3.10595	0.288709	0.339404	0.348039	0.338642	0.329504		-0.0154431	0.035252	0.0438868	0.0344892	0.0253516				1.17295		09_MeNH2-MeOH_1.00	-210.352				-211.282	-211.29	-211.316	-211.322	1.2055		09_MeNH2-MeOH_1.00		-95.2568			-95.7049	-95.7124	-95.7253	-95.7279	1.19749		-115.094
09_MeNH2-MeOH_1.05	1.32564			2.92038		2.67471	2.91543	2.95804	0.240718	0.283328	0.290212	0.282368	0.274732		-0.00495077	0.0376589	0.044543	0.0366983	0.0290627				1.17302		09_MeNH2-MeOH_1.05	-210.352				-211.282	-211.29	-211.316	-211.321	1.20561		09_MeNH2-MeOH_1.05		-95.2568			-95.7049	-95.7124	-95.7253	-95.7279	1.19749		-115.094
09_MeNH2-MeOH_1.10	1.38919			2.70684		2.50631	2.70691	2.74283	0.200594	0.236514	0.241857	0.235314	0.228938		7.04207e-05	0.0359909	0.0413333	0.0347912	0.0284143				1.17309		09_MeNH2-MeOH_1.10	-210.353				-211.282	-211.29	-211.316	-211.321	1.2057		09_MeNH2-MeOH_1.10		-95.2568			-95.7049	-95.7124	-95.7253	-95.7279	1.19749		-115.094
09_MeNH2-MeOH_1.25	1.23698			1.99485		1.87882	1.99547	2.01746	0.116646	0.138635	0.140664	0.136854	0.133128		0.000619271	0.0226086	0.0246377	0.020827	0.0171013				1.17324		09_MeNH2-MeOH_1.25	-210.352				-211.281	-211.289	-211.314	-211.32	1.20591		09_MeNH2-MeOH_1.25		-95.2568			-95.7049	-95.7124	-95.7253	-95.7279	1.19749		-115.094
09_MeNH2-MeOH_1.50	0.7993			1.12118		1.06706	1.11737	1.12832	0.0503085	0.0612568	0.0606756	0.0590305	0.0574171		-0.00380918	0.00713907	0.00655791	0.00491281	0.00329942				1.17337		09_MeNH2-MeOH_1.50	-210.352				-211.279	-211.287	-211.313	-211.318	1.20607		09_MeNH2-MeOH_1.50		-95.2568			-95.7049	-95.7124	-95.7253	-95.7279	1.19749		-115.094
09_MeNH2-MeOH_2.00	0.335854			0.408372		0.392631	0.404773	0.409915	0.0121427	0.0172838	0.0146465	0.0142492	0.0138585		-0.00359819	0.00154284	-0.00109439	-0.00149167	-0.00188242				1.17348		09_MeNH2-MeOH_2.00	-210.351				-211.278	-211.286	-211.312	-211.317	1.2062		09_MeNH2-MeOH_2.00		-95.2568			-95.7049	-95.7124	-95.7253	-95.7279	1.19749		-115.094
10_MeNH2-MeNH2_0.90	-0.696709			4.02489		3.09014	3.69662	3.79222	0.606479	0.702076	0.725353	0.705008	0.692174		-0.32827	-0.232673	-0.209396	-0.229742	-0.242575				1.16246		10_MeNH2-MeNH2_0.90	-190.512				-191.416	-191.43	-191.457	-191.462	1.19601		10_MeNH2-MeNH2_0.90		-95.2567			-95.7049	-95.7124	-95.7253	-95.7279	1.19746		-95.2568
10_MeNH2-MeNH2_0.95	0.43983			4.33939		3.58602	4.09847	4.17852	0.512451	0.592504	0.612983	0.595745	0.58486		-0.240917	-0.160864	-0.140385	-0.157623	-0.168508				1.16254		10_MeNH2-MeNH2_0.95	-190.514				-191.417	-191.431	-191.457	-191.462	1.19618		10_MeNH2-MeNH2_0.95		-95.2567			-95.7049	-95.7124	-95.7253	-95.7279	1.19746		-95.2568
10_MeNH2-MeNH2_1.00	1.11246			4.33878		3.72851	4.16075	4.22771	0.432241	0.499195	0.517106	0.502532	0.493316		-0.178029	-0.111074	-0.0931638	-0.107738	-0.116953				1.16262		10_MeNH2-MeNH2_1.00	-190.515				-191.417	-191.431	-191.457	-191.463	1.19634		10_MeNH2-MeNH2_1.00		-95.2567			-95.7049	-95.7124	-95.7253	-95.7279	1.19746		-95.2568
10_MeNH2-MeNH2_1.05	1.4791			4.15268		3.65571	4.01971	4.07562	0.363996	0.419909	0.435514	0.423218	0.415428		-0.132966	-0.077053	-0.0614484	-0.0737442	-0.0815337				1.1627		10_MeNH2-MeNH2_1.05	-190.516				-191.417	-191.431	-191.457	-191.462	1.19648		10_MeNH2-MeNH2_1.05		-95.2567			-95.7049	-95.7124	-95.7253	-95.7279	1.19746		-95.2568
10_MeNH2-MeNH2_1.10	1.646			3.86668		3.45941	3.76575	3.8124	0.306332	0.352984	0.366559	0.356197	0.349617		-0.10093	-0.0542785	-0.0407037	-0.0510655	-0.0576455				1.16278		10_MeNH2-MeNH2_1.10	-190.516				-191.416	-191.43	-191.457	-191.462	1.19661		10_MeNH2-MeNH2_1.10		-95.2567			-95.7049	-95.7124	-95.7253	-95.7279	1.19746		-95.2568
10_MeNH2-MeNH2_1.25	1.56985			2.86135		2.62794	2.81056	2.83759	0.182628	0.20965	0.218585	0.212389	0.208433		-0.0507846	-0.0237622	-0.0148268	-0.0210236	-0.0249793				1.16296		10_MeNH2-MeNH2_1.25	-190.516				-191.414	-191.429	-191.455	-191.46	1.19689		10_MeNH2-MeNH2_1.25		-95.2567			-95.7049	-95.7124	-95.7253	-95.7279	1.19746		-95.2568
10_MeNH2-MeNH2_1.50	0.898064			1.34839		1.26099	1.32576	1.33447	0.064771	0.0734779	0.0775434	0.075341	0.0739232		-0.0226317	-0.0139248	-0.00985936	-0.0120617	-0.0134795				1.16319		10_MeNH2-MeNH2_1.50	-190.515				-191.412	-191.427	-191.453	-191.458	1.19719		10_MeNH2-MeNH2_1.50		-95.2567			-95.7049	-95.7124	-95.7253	-95.7279	1.19746		-95.2568
10_MeNH2-MeNH2_2.00	0.314242			0.406493		0.383958	0.397309	0.398653	0.0133511	0.0146948	0.0159861	0.0155316	0.0152376		-0.00918422	-0.00784052	-0.0065492	-0.00700371	-0.0072977				1.16332		10_MeNH2-MeNH2_2.00	-190.514				-191.411	-191.425	-191.451	-191.456	1.19736		10_MeNH2-MeNH2_2.00		-95.2567			-95.7049	-95.7124	-95.7253	-95.7279	1.19746		-95.2568
11_MeNH2-Peptide_0.90	-0.180552			5.23241		4.16253	4.93122	5.04485	0.768686	0.882319	0.922311	0.899171	0.877302		-0.301195	-0.187563	-0.147571	-0.170711	-0.19258				1.16975		11_MeNH2-Peptide_0.90	-342.363				-343.878	-343.876	-343.926	-343.936	1.19985		11_MeNH2-Peptide_0.90		-95.2567			-95.7049	-95.7124	-95.7253	-95.7278	1.19747		-247.106
11_MeNH2-Peptide_0.95	1.01435			5.5704		4.69263	5.35298	5.44838	0.660346	0.755754	0.79239	0.772479	0.753653		-0.217426	-0.122017	-0.0853815	-0.105292	-0.124119				1.16981		11_MeNH2-Peptide_0.95	-342.365				-343.878	-343.876	-343.927	-343.937	1.19996		11_MeNH2-Peptide_0.95		-95.2567			-95.7049	-95.7124	-95.7253	-95.7278	1.19747		-247.106
11_MeNH2-Peptide_1.00	1.72966			5.56971		4.84712	5.41374	5.49368	0.56662	0.646563	0.679981	0.662877	0.646683		-0.15597	-0.0760274	-0.0426088	-0.0597129	-0.0759069				1.16988		11_MeNH2-Peptide_1.00	-342.366				-343.878	-343.877	-343.927	-343.937	1.20007		11_MeNH2-Peptide_1.00		-95.2567			-95.7049	-95.7124	-95.7253	-95.7278	1.19747		-247.106
11_MeNH2-Peptide_1.05	2.1233			5.36295		4.76625	5.25175	5.31852	0.485499	0.552274	0.582678	0.568005	0.5541		-0.111201	-0.0444266	-0.0140216	-0.0286953	-0.0426				1.16994		11_MeNH2-Peptide_1.05	-342.366				-343.878	-343.876	-343.926	-343.936	1.20016		11_MeNH2-Peptide_1.05		-95.2567			-95.7049	-95.7124	-95.7253	-95.7278	1.19747		-247.106
11_MeNH2-Peptide_1.10	2.30262			5.03943		4.54484	4.96043	5.01601	0.415593	0.471171	0.498817	0.486244	0.474316		-0.0790041	-0.0234261	0.00421982	-0.00835328	-0.0202808				1.17		11_MeNH2-Peptide_1.10	-342.367				-343.877	-343.876	-343.926	-343.936	1.20025		11_MeNH2-Peptide_1.10		-95.2567			-95.7049	-95.7124	-95.7253	-95.7278	1.19747		-247.106
11_MeNH2-Peptide_1.25	1.98089			3.24952		3.03321	3.23357	3.25537	0.200357	0.222158	0.240539	0.234463	0.228667		-0.0159533	0.00584828	0.024229	0.0181535	0.0123571				1.17023		11_MeNH2-Peptide_1.25	-342.366				-343.874	-343.874	-343.923	-343.933	1.20055		11_MeNH2-Peptide_1.25		-95.2567			-95.7049	-95.7124	-95.7253	-95.7278	1.19747		-247.106
11_MeNH2-Peptide_1.50	1.03974			1.41798		1.35541	1.41915	1.42051	0.063738	0.0650996	0.0765353	0.0745996	0.0727442		0.00116803	0.00252963	0.0139653	0.0120296	0.0101742				1.17041		11_MeNH2-Peptide_1.50	-342.365				-343.872	-343.871	-343.92	-343.93	1.20078		11_MeNH2-Peptide_1.50		-95.2567			-95.7049	-95.7124	-95.7253	-95.7278	1.19747		-247.106
11_MeNH2-Peptide_2.00	0.405691			0.463975		0.454466	0.465942	0.461001	0.0114765	0.00653524	0.0137823	0.0134334	0.0130981		0.00196751	-0.00297372	0.0042733	0.00392448	0.00358914				1.17052		11_MeNH2-Peptide_2.00	-342.364				-343.87	-343.87	-343.919	-343.929	1.20091		11_MeNH2-Peptide_2.00		-95.2567			-95.7049	-95.7124	-95.7253	-95.7278	1.19747		-247.106
12_MeNH2-Water_0.90	3.27715			7.25781		6.32936	6.8403	6.95224	0.510943	0.622889	0.617041	0.601599	0.583139		-0.41751	-0.305564	-0.311412	-0.326854	-0.345314				1.17743		12_MeNH2-Water_0.90	-171.323				-172.074	-172.074	-172.095	-172.099	1.20765		12_MeNH2-Water_0.90		-95.2568			-95.705	-95.7124	-95.7254	-95.7279	1.19742		-76.0609
12_MeNH2-Water_0.95	4.24775			7.61509		6.84403	7.29135	7.39044	0.447313	0.546407	0.54021	0.526657	0.510518		-0.323742	-0.224647	-0.230844	-0.244397	-0.260536				1.17738		12_MeNH2-Water_0.95	-171.325				-172.074	-172.075	-172.096	-172.1	1.20768		12_MeNH2-Water_0.95		-95.2568			-95.705	-95.7124	-95.7254	-95.7279	1.19742		-76.0609
12_MeNH2-Water_1.00	4.73518			7.57949		6.93896	7.32809	7.41572	0.389132	0.476766	0.469965	0.458148	0.444116		-0.251402	-0.163768	-0.170568	-0.182386	-0.196418				1.17736		12_MeNH2-Water_1.00	-171.325				-172.074	-172.075	-172.096	-172.1	1.20773		12_MeNH2-Water_1.00		-95.2568			-95.705	-95.7124	-95.7254	-95.7279	1.19742		-76.0609
12_MeNH2-Water_1.05	4.90148			7.30091		6.76803	7.1045	7.18199	0.336469	0.413961	0.406384	0.396145	0.384012		-0.196418	-0.118926	-0.126503	-0.136742	-0.148875				1.17736		12_MeNH2-Water_1.05	-171.326				-172.074	-172.075	-172.095	-172.099	1.20779		12_MeNH2-Water_1.05		-95.2568			-95.705	-95.7124	-95.7254	-95.7279	1.19742		-76.0609
12_MeNH2-Water_1.10	4.85864			6.88247		6.43765	6.7272	6.7958	0.289541	0.35815	0.349725	0.3409	0.330453		-0.155274	-0.0866649	-0.0950898	-0.103915	-0.114361				1.17738		12_MeNH2-Water_1.10	-171.325				-172.073	-172.074	-172.095	-172.099	1.20786		12_MeNH2-Water_1.10		-95.2568			-95.705	-95.7124	-95.7254	-95.7279	1.19742		-76.0609
12_MeNH2-Water_1.25	4.14675			5.3645		5.09884	5.27938	5.32772	0.180536	0.228883	0.218097	0.212576	0.206046		-0.0851206	-0.0367741	-0.0475602	-0.0530809	-0.0596109				1.17747		12_MeNH2-Water_1.25	-171.324				-172.071	-172.072	-172.092	-172.096	1.20805		12_MeNH2-Water_1.25		-95.2568			-95.705	-95.7124	-95.7254	-95.7279	1.19742		-76.0609
12_MeNH2-Water_1.50	2.7131			3.24874		3.12328	3.20199	3.23185	0.0787038	0.10857	0.0950952	0.0926808	0.0898246		-0.0467495	-0.0168832	-0.0303581	-0.0327725	-0.0356287				1.17759		12_MeNH2-Water_1.50	-171.322				-172.067	-172.069	-172.089	-172.093	1.20827		12_MeNH2-Water_1.50		-95.2568			-95.705	-95.7124	-95.7254	-95.7279	1.19742		-76.0609
12_MeNH2-Water_2.00	1.13152			1.25476		1.214	1.22976	1.24849	0.0157667	0.034496	0.0190529	0.0185684	0.0179945		-0.0249925	-0.00626328	-0.0217064	-0.0221908	-0.0227647				1.1777		12_MeNH2-Water_2.00	-171.32				-172.064	-172.066	-172.086	-172.09	1.20843		12_MeNH2-Water_2.00		-95.2568			-95.705	-95.7124	-95.7254	-95.7279	1.19742		-76.0609
13_Peptide-MeOH_0.90	1.6842			5.99301		5.13689	5.75083	5.85953	0.613939	0.72264	0.739824	0.721906	0.700688		-0.242176	-0.133475	-0.116291	-0.134209	-0.155427				1.17586		13_Peptide-MeOH_0.90	-362.203				-363.747	-363.738	-363.788	-363.798	1.20505		13_Peptide-MeOH_0.90		-247.106			-248.164	-248.157	-248.193	-248.2	1.20242		-115.094
13_Peptide-MeOH_0.95	2.71825			6.35014		5.65293	6.18146	6.27633	0.528535	0.623399	0.636971	0.62152	0.603217		-0.168678	-0.0738136	-0.0602423	-0.0756927	-0.0939959				1.17593		13_Peptide-MeOH_0.95	-362.204				-363.747	-363.739	-363.789	-363.799	1.20516		13_Peptide-MeOH_0.95		-247.106			-248.164	-248.157	-248.193	-248.2	1.20242		-115.094
13_Peptide-MeOH_1.00	3.30306			6.3671		5.79639	6.25016	6.33329	0.453768	0.536891	0.546916	0.533631	0.517885		-0.116942	-0.0338184	-0.0237931	-0.0370784	-0.0528241				1.176		13_Peptide-MeOH_1.00	-362.205				-363.747	-363.739	-363.789	-363.799	1.20528		13_Peptide-MeOH_1.00		-247.106			-248.164	-248.157	-248.193	-248.2	1.20242		-115.094
13_Peptide-MeOH_1.05	3.5874			6.17424		5.70444	6.09292	6.16608	0.388489	0.461646	0.46828	0.45689	0.443382		-0.0813187	-0.00816143	-0.0015279	-0.0129175	-0.0264253				1.17607		13_Peptide-MeOH_1.05	-362.206				-363.747	-363.739	-363.788	-363.799	1.20539		13_Peptide-MeOH_1.05		-247.106			-248.164	-248.157	-248.193	-248.2	1.20242		-115.094
13_Peptide-MeOH_1.10	3.67299			5.85998		5.47062	5.80259	5.86731	0.331968	0.396686	0.400184	0.390441	0.378875		-0.0573872	0.00733073	0.0108287	0.00108557	-0.0104802				1.17614		13_Peptide-MeOH_1.10	-362.206				-363.746	-363.738	-363.788	-363.798	1.20549		13_Peptide-MeOH_1.10		-247.106			-248.164	-248.157	-248.193	-248.2	1.20242		-115.094
13_Peptide-MeOH_1.25	3.34886			4.68013		4.44996	4.65566	4.70189	0.205705	0.251937	0.248025	0.241975	0.234771		-0.0244722	0.0217602	0.0178475	0.0117977	0.00459387				1.17632		13_Peptide-MeOH_1.25	-362.205				-363.744	-363.737	-363.786	-363.796	1.20573		13_Peptide-MeOH_1.25		-247.106			-248.164	-248.157	-248.193	-248.2	1.20242		-115.094
13_Peptide-MeOH_1.50	2.40725			3.00116		2.89551	2.98901	3.01864	0.0934985	0.123124	0.112754	0.109999	0.10671		-0.0121529	0.0174728	0.00710216	0.00434771	0.00105843				1.17648		13_Peptide-MeOH_1.50	-362.204				-363.742	-363.734	-363.783	-363.794	1.20594		13_Peptide-MeOH_1.50		-247.106			-248.164	-248.157	-248.193	-248.2	1.20242		-115.094
13_Peptide-MeOH_2.00	1.21983			1.33531		1.30965	1.32881	1.348	0.0191624	0.0383545	0.0231117	0.0225466	0.02187		-0.00650293	0.0126892	-0.0025536	-0.00311867	-0.00379529				1.17661		13_Peptide-MeOH_2.00	-362.202				-363.739	-363.732	-363.781	-363.791	1.2061		13_Peptide-MeOH_2.00		-247.106			-248.164	-248.157	-248.193	-248.2	1.20242		-115.094
14_Peptide-MeNH2_0.90	1.6131			7.35951		6.10205	6.91098	7.02789	0.808926	0.925835	0.970401	0.946176	0.923227		-0.448529	-0.33162	-0.287054	-0.311278	-0.334227				1.16967		14_Peptide-MeNH2_0.90	-342.365				-343.881	-343.878	-343.929	-343.939	1.19962		14_Peptide-MeNH2_0.90		-247.106			-248.164	-248.156	-248.193	-248.2	1.20237		-95.2568
14_Peptide-MeNH2_0.95	2.88325			7.76507		6.72564	7.43287	7.53315	0.707233	0.807517	0.848491	0.827265	0.807165		-0.332199	-0.231916	-0.190941	-0.212168	-0.232267				1.16972		14_Peptide-MeNH2_0.95	-342.367				-343.882	-343.879	-343.93	-343.94	1.19973		14_Peptide-MeNH2_0.95		-247.106			-248.164	-248.156	-248.193	-248.2	1.20237		-95.2568
14_Peptide-MeNH2_1.00	3.63023			7.77889		6.91748	7.5337	7.61946	0.616223	0.701978	0.739375	0.720846	0.703296		-0.245186	-0.159431	-0.122034	-0.140563	-0.158113				1.16978		14_Peptide-MeNH2_1.00	-342.369				-343.882	-343.88	-343.93	-343.94	1.19985		14_Peptide-MeNH2_1.00		-247.106			-248.164	-248.156	-248.193	-248.2	1.20237		-95.2568
14_Peptide-MeNH2_1.05	4.01928			7.54599		6.82992	7.36502	7.43809	0.535101	0.608167	0.6421	0.625982	0.610711		-0.180968	-0.107902	-0.0739685	-0.0900864	-0.105358				1.16984		14_Peptide-MeNH2_1.05	-342.369				-343.881	-343.88	-343.93	-343.94	1.19996		14_Peptide-MeNH2_1.05		-247.106			-248.164	-248.156	-248.193	-248.2	1.20237		-95.2568
14_Peptide-MeNH2_1.10	4.16533			7.16681		6.56899	7.03251	7.09455	0.463519	0.525557	0.556254	0.542276	0.529015		-0.134293	-0.072256	-0.0415589	-0.0555369	-0.0687981				1.16991		14_Peptide-MeNH2_1.10	-342.369				-343.881	-343.879	-343.929	-343.939	1.20007		14_Peptide-MeNH2_1.10		-247.106			-248.164	-248.156	-248.193	-248.2	1.20237		-95.2568
14_Peptide-MeNH2_1.25	3.85812			5.72326		5.36564	5.66396	5.70091	0.298323	0.335267	0.358084	0.349062	0.340476		-0.0592955	-0.0223522	0.000465028	-0.00855673	-0.0171425				1.17008		14_Peptide-MeNH2_1.25	-342.369				-343.878	-343.877	-343.927	-343.937	1.20032		14_Peptide-MeNH2_1.25		-247.106			-248.164	-248.156	-248.193	-248.2	1.20237		-95.2568
14_Peptide-MeNH2_1.50	2.75516			3.62574		3.45835	3.60075	3.61427	0.1424	0.155927	0.170962	0.166645	0.162521		-0.0249913	-0.0114648	0.0035704	-0.000746285	-0.00487019				1.17026		14_Peptide-MeNH2_1.50	-342.367				-343.875	-343.874	-343.924	-343.934	1.20057		14_Peptide-MeNH2_1.50		-247.106			-248.164	-248.156	-248.193	-248.2	1.20237		-95.2568
14_Peptide-MeNH2_2.00	1.33016			1.54417		1.49442	1.52956	1.52782	0.035142	0.0333945	0.0421977	0.0411309	0.0401076		-0.0146098	-0.0163573	-0.00755414	-0.0086209	-0.00964424				1.17042		14_Peptide-MeNH2_2.00	-342.365				-343.872	-343.871	-343.92	-343.93	1.20078		14_Peptide-MeNH2_2.00		-247.106			-248.164	-248.156	-248.193	-248.2	1.20237		-95.2568
15_Peptide-Peptide_0.90	2.92275			8.28101		7.26566	8.12735	8.25357	0.861686	0.987906	1.03529	1.01077	0.983442		-0.153659	-0.027439	0.0199436	-0.00457884	-0.0319029				1.17301		15_Peptide-Peptide_0.90	-494.216				-496.341	-496.324	-496.398	-496.413	1.20147		15_Peptide-Peptide_0.90		-247.106			-248.164	-248.156	-248.192	-248.2	1.2025		-247.106
15_Peptide-Peptide_0.95	4.11386			8.71234		7.87576	8.63609	8.74558	0.760331	0.869822	0.913575	0.891907	0.867766		-0.0762443	0.0332463	0.0769992	0.0553311	0.0311905				1.17305		15_Peptide-Peptide_0.95	-494.218				-496.342	-496.325	-496.399	-496.414	1.20155		15_Peptide-Peptide_0.95		-247.106			-248.164	-248.156	-248.192	-248.2	1.2025		-247.106
15_Peptide-Peptide_1.00	4.79525			8.74207		8.05161	8.72055	8.81544	0.668939	0.763831	0.803817	0.784732	0.76346		-0.0215165	0.0733757	0.113362	0.0942767	0.0730045				1.1731		15_Peptide-Peptide_1.00	-494.219				-496.342	-496.325	-496.399	-496.414	1.20163		15_Peptide-Peptide_1.00		-247.106			-248.164	-248.156	-248.192	-248.2	1.2025		-247.106
15_Peptide-Peptide_1.05	5.12861			8.51615		7.94488	8.53172	8.61389	0.58684	0.669005	0.705214	0.688457	0.669761		0.0155708	0.0977356	0.133945	0.117188	0.0984913				1.17316		15_Peptide-Peptide_1.05	-494.22				-496.342	-496.325	-496.399	-496.413	1.20171		15_Peptide-Peptide_1.05		-247.106			-248.164	-248.156	-248.192	-248.2	1.2025		-247.106
15_Peptide-Peptide_1.10	5.22606			8.13563		7.66118	8.17499	8.2461	0.513808	0.584912	0.617491	0.602804	0.586409		0.0393598	0.110464	0.143043	0.128356	0.111961				1.17321		15_Peptide-Peptide_1.10	-494.22				-496.341	-496.325	-496.398	-496.413	1.20179		15_Peptide-Peptide_1.10		-247.106			-248.164	-248.156	-248.192	-248.2	1.2025		-247.106
15_Peptide-Peptide_1.25	4.79764			6.64843		6.37051	6.71286	6.75862	0.342351	0.388103	0.411504	0.401701	0.390725		0.0644361	0.110188	0.133589	0.123786	0.11281				1.17336		15_Peptide-Peptide_1.25	-494.219				-496.339	-496.322	-496.396	-496.41	1.20199		15_Peptide-Peptide_1.25		-247.106			-248.164	-248.156	-248.192	-248.2	1.2025		-247.106
15_Peptide-Peptide_1.50	3.52162			4.40024		4.27947	4.45336	4.47447	0.173885	0.194997	0.209045	0.20406	0.198455		0.0531164	0.0742286	0.0882761	0.0832908	0.0776864				1.17353		15_Peptide-Peptide_1.50	-494.217				-496.335	-496.319	-496.392	-496.407	1.2022		15_Peptide-Peptide_1.50		-247.106			-248.164	-248.156	-248.192	-248.2	1.2025		-247.106
15_Peptide-Peptide_2.00	1.63192			1.7741		1.75883	1.79593	1.7989	0.0371034	0.0400784	0.0446134	0.0435482	0.0423461		0.0218289	0.024804	0.029339	0.0282738	0.0270716				1.1737		15_Peptide-Peptide_2.00	-494.214				-496.331	-496.315	-496.388	-496.403	1.20241		15_Peptide-Peptide_2.00		-247.106			-248.164	-248.156	-248.192	-248.2	1.2025		-247.106
16_Peptide-Water_0.90	2.37731			4.9083		4.44907	4.84299	4.94147	0.393912	0.492399	0.475413	0.464493	0.449572		-0.0653192	0.0331682	0.0161814	0.00526197	-0.00965942				1.17918		16_Peptide-Water_0.90	-323.171				-324.529	-324.515	-324.559	-324.568	1.2069		16_Peptide-Water_0.90		-247.106			-248.164	-248.156	-248.193	-248.2	1.20255		-76.0615
16_Peptide-Water_0.95	3.15332			5.22954		4.87109	5.20517	5.2935	0.33408	0.422409	0.403228	0.393953	0.381285		-0.0243701	0.0639588	0.0447782	0.0355036	0.0228353				1.17922		16_Peptide-Water_0.95	-323.172				-324.53	-324.516	-324.56	-324.569	1.20698		16_Peptide-Water_0.95		-247.106			-248.164	-248.156	-248.193	-248.2	1.20255		-76.0615
16_Peptide-Water_1.00	3.55182			5.25558		4.97397	5.25633	5.33625	0.282353	0.362276	0.340819	0.332971	0.32225		0.000747598	0.0806697	0.0592133	0.0513651	0.0406441				1.17927		16_Peptide-Water_1.00	-323.173				-324.53	-324.516	-324.56	-324.569	1.20707		16_Peptide-Water_1.00		-247.106			-248.164	-248.156	-248.193	-248.2	1.20255		-76.0615
16_Peptide-Water_1.05	3.70412			5.10195		4.87914	5.11692	5.18985	0.237778	0.310711	0.287033	0.280416	0.271376		0.0149634	0.087897	0.0642186	0.0576018	0.0485615				1.17932		16_Peptide-Water_1.05	-323.173				-324.53	-324.516	-324.559	-324.568	1.20715		16_Peptide-Water_1.05		-247.106			-248.164	-248.156	-248.193	-248.2	1.20255		-76.0615
16_Peptide-Water_1.10	3.69882			4.84605		4.66828	4.86801	4.93513	0.199735	0.266858	0.241125	0.235562	0.227958		0.0219648	0.0890881	0.0633547	0.0577913	0.0501874				1.17937		16_Peptide-Water_1.10	-323.173				-324.529	-324.516	-324.559	-324.568	1.20722		16_Peptide-Water_1.10		-247.106			-248.164	-248.156	-248.193	-248.2	1.20255		-76.0615
16_Peptide-Water_1.25	3.2529			3.8867		3.79216	3.90957	3.96433	0.117405	0.17217	0.141755	0.138481	0.133994		0.0228653	0.0776304	0.0472148	0.0439407	0.0394547				1.17951		16_Peptide-Water_1.25	-323.173				-324.528	-324.514	-324.558	-324.567	1.2074		16_Peptide-Water_1.25		-247.106			-248.164	-248.156	-248.193	-248.2	1.20255		-76.0615
16_Peptide-Water_1.50	2.30673			2.53606		2.49879	2.54757	2.59176	0.0487761	0.0929695	0.0588988	0.0575368	0.0556682		0.0115029	0.0556963	0.0216256	0.0202636	0.018395				1.17961		16_Peptide-Water_1.50	-323.171				-324.526	-324.512	-324.555	-324.564	1.20753		16_Peptide-Water_1.50		-247.106			-248.164	-248.156	-248.193	-248.2	1.20255		-76.0615
16_Peptide-Water_2.00	1.18409			1.18747		1.18202	1.18815	1.22612	0.00612744	0.0440923	0.00739968	0.00722848	0.00699325		0.000686974	0.0386518	0.00195921	0.00178801	0.00155278				1.17969		16_Peptide-Water_2.00	-323.169				-324.523	-324.51	-324.553	-324.562	1.20763		16_Peptide-Water_2.00		-247.106			-248.164	-248.156	-248.193	-248.2	1.20255		-76.0615
17_Uracil-Uracil_BP_0.90	10.0211			16.0802		14.7531	16.0563	16.2709	1.30325	1.51785	1.57019	1.54092	1.4874		-0.0239414	0.190659	0.243002	0.213732	0.160208				1.18237		17_Uracil-Uracil_BP_0.90	-825.273				-828.578	-828.475	-828.606	-828.633	1.20483		17_Uracil-Uracil_BP_0.90		-412.628			-414.276	-414.226	-414.29	-414.304	1.20546		-412.629
17_Uracil-Uracil_BP_0.95	12.0072			17.1161		16.0601	17.2237	17.4101	1.16355	1.34994	1.40188	1.37572	1.32796		0.107523	0.293918	0.345857	0.319696	0.271932				1.18235		17_Uracil-Uracil_BP_0.95	-825.276				-828.58	-828.477	-828.608	-828.635	1.20483		17_Uracil-Uracil_BP_0.95		-412.628			-414.276	-414.226	-414.29	-414.304	1.20546		-412.629
17_Uracil-Uracil_BP_1.00	12.9843			17.2745		16.4424	17.476	17.6371	1.03362	1.19472	1.24536	1.22209	1.17967		0.201507	0.362606	0.413245	0.389978	0.347558				1.18234		17_Uracil-Uracil_BP_1.00	-825.278				-828.58	-828.478	-828.609	-828.635	1.20485		17_Uracil-Uracil_BP_1.00		-412.628			-414.276	-414.226	-414.29	-414.304	1.20546		-412.629
17_Uracil-Uracil_BP_1.05	13.2753			16.8639		16.2138	17.1275	17.2664	0.913782	1.05261	1.101	1.0804	1.0429		0.263687	0.402515	0.450901	0.430306	0.392804				1.18234		17_Uracil-Uracil_BP_1.05	-825.278				-828.579	-828.477	-828.608	-828.635	1.20488		17_Uracil-Uracil_BP_1.05		-412.628			-414.276	-414.226	-414.29	-414.304	1.20546		-412.629
17_Uracil-Uracil_BP_1.10	13.1086			16.1021		15.5973	16.4021	16.5216	0.804791	0.924318	0.969704	0.951544	0.918508		0.299973	0.4195	0.464886	0.446726	0.413689				1.18235		17_Uracil-Uracil_BP_1.10	-825.278				-828.578	-828.476	-828.607	-828.634	1.20491		17_Uracil-Uracil_BP_1.10		-412.628			-414.276	-414.226	-414.29	-414.304	1.20546		-412.629
17_Uracil-Uracil_BP_1.25	11.2808			12.9928		12.7639	13.305	13.3811	0.541117	0.617207	0.65207	0.639838	0.617577		0.312209	0.388299	0.423162	0.41093	0.388668				1.18244		17_Uracil-Uracil_BP_1.25	-825.275				-828.573	-828.472	-828.602	-828.629	1.20504		17_Uracil-Uracil_BP_1.25		-412.628			-414.276	-414.226	-414.29	-414.304	1.20546		-412.629
17_Uracil-Uracil_BP_1.50	7.5842			8.21268		8.16395	8.4395	8.47443	0.275553	0.310485	0.332099	0.325861	0.314489		0.226824	0.261756	0.283369	0.277131	0.265759				1.18257		17_Uracil-Uracil_BP_1.50	-825.269				-828.566	-828.464	-828.594	-828.621	1.20521		17_Uracil-Uracil_BP_1.50		-412.628			-414.276	-414.226	-414.29	-414.304	1.20546		-412.629
17_Uracil-Uracil_BP_2.00	3.27339			3.27782		3.29644	3.37739	3.3836	0.0809473	0.0871512	0.0975695	0.0957355	0.0923851		0.0995712	0.105775	0.116193	0.114359	0.111009				1.18269		17_Uracil-Uracil_BP_2.00	-825.262				-828.558	-828.457	-828.586	-828.613	1.20535		17_Uracil-Uracil_BP_2.00		-412.628			-414.276	-414.226	-414.29	-414.304	1.20546		-412.629
18_Water-Pyridine_0.90	3.34811			6.83527		6.00177	6.53191	6.71078	0.530141	0.70901	0.633704	0.620446	0.60505		-0.303355	-0.124487	-0.199792	-0.213051	-0.228446				1.17034		18_Water-Pyridine_0.90	-322.848				-324.238	-324.21	-324.266	-324.277	1.19535		18_Water-Pyridine_0.90		-76.061			-76.3573	-76.3518	-76.3586	-76.3601	1.2257		-246.782
18_Water-Pyridine_0.95	4.20839			7.15873		6.46597	6.93112	7.09973	0.46515	0.63376	0.55605	0.544393	0.530876		-0.227608	-0.0589977	-0.136709	-0.148365	-0.161882				1.17036		18_Water-Pyridine_0.95	-322.85				-324.239	-324.211	-324.266	-324.277	1.19542		18_Water-Pyridine_0.95		-76.061			-76.3573	-76.3518	-76.3586	-76.3601	1.2257		-246.782
18_Water-Pyridine_1.00	4.62486			7.1186		6.54222	6.94756	7.10731	0.405344	0.565086	0.484588	0.474414	0.462619		-0.171037	-0.0112945	-0.0917922	-0.101966	-0.113762				1.1704		18_Water-Pyridine_1.00	-322.85				-324.239	-324.211	-324.267	-324.277	1.1955		18_Water-Pyridine_1.00		-76.061			-76.3573	-76.3518	-76.3586	-76.3601	1.2257		-246.782
18_Water-Pyridine_1.05	4.7483			6.85489		6.37413	6.72513	6.87722	0.350999	0.503093	0.419649	0.410827	0.400595		-0.129761	0.0223329	-0.0611107	-0.0699334	-0.080165				1.17045		18_Water-Pyridine_1.05	-322.851				-324.238	-324.211	-324.266	-324.277	1.19559		18_Water-Pyridine_1.05		-76.061			-76.3573	-76.3518	-76.3586	-76.3601	1.2257		-246.782
18_Water-Pyridine_1.10	4.68259			6.46328		6.0604	6.36285	6.50837	0.302446	0.447962	0.361626	0.354013	0.345182		-0.100431	0.0450841	-0.0412518	-0.0488644	-0.0576958				1.1705		18_Water-Pyridine_1.10	-322.851				-324.238	-324.21	-324.266	-324.276	1.19567		18_Water-Pyridine_1.10		-76.061			-76.3573	-76.3518	-76.3586	-76.3601	1.2257		-246.782
18_Water-Pyridine_1.25	3.96917			5.05276		4.80713	4.99665	5.12729	0.189514	0.320159	0.226636	0.221853	0.216292		-0.056112	0.0745333	-0.0189902	-0.0237734	-0.0293337				1.17064		18_Water-Pyridine_1.25	-322.849				-324.235	-324.208	-324.263	-324.274	1.19588		18_Water-Pyridine_1.25		-76.061			-76.3573	-76.3518	-76.3586	-76.3601	1.2257		-246.782
18_Water-Pyridine_1.50	2.60327			3.09377		2.97197	3.05685	3.17366	0.0848799	0.201684	0.101523	0.0993774	0.0968735		-0.0369152	0.0798893	-0.0202726	-0.0224177	-0.0249216				1.1708		18_Water-Pyridine_1.50	-322.847				-324.232	-324.205	-324.26	-324.271	1.19607		18_Water-Pyridine_1.50		-76.061			-76.3573	-76.3518	-76.3586	-76.3601	1.2257		-246.782
18_Water-Pyridine_2.00	1.11691			1.23692		1.19489	1.21352	1.32197	0.0186271	0.12708	0.0222819	0.0218105	0.0212591		-0.0234075	0.0850452	-0.0197528	-0.0202242	-0.0207755				1.1709		18_Water-Pyridine_2.00	-322.845				-324.229	-324.203	-324.257	-324.268	1.19621		18_Water-Pyridine_2.00		-76.061			-76.3573	-76.3518	-76.3586	-76.3601	1.2257		-246.782
19_MeOH-Pyridine_0.90	2.7251			7.29418		6.17382	6.87836	7.05754	0.704547	0.883721	0.842019	0.823164	0.804099		-0.415819	-0.236645	-0.278347	-0.297202	-0.316267				1.16836		19_MeOH-Pyridine_0.90	-361.879				-363.454	-363.432	-363.493	-363.506	1.19512		19_MeOH-Pyridine_0.90		-115.093			-115.572	-115.573	-115.586	-115.588	1.2145		-246.782
19_MeOH-Pyridine_0.95	3.8037			7.70687		6.76925	7.39173	7.55857	0.622477	0.789314	0.743995	0.727302	0.710433		-0.315137	-0.148299	-0.193619	-0.210312	-0.227181				1.1684		19_MeOH-Pyridine_0.95	-361.881				-363.454	-363.432	-363.494	-363.506	1.19522		19_MeOH-Pyridine_0.95		-115.093			-115.572	-115.573	-115.586	-115.588	1.2145		-246.782
19_MeOH-Pyridine_1.00	4.38252			7.71383		6.92893	7.47582	7.63183	0.546887	0.702895	0.653704	0.639016	0.624162		-0.238005	-0.0819972	-0.131188	-0.145876	-0.16073				1.16846		19_MeOH-Pyridine_1.00	-361.882				-363.455	-363.433	-363.494	-363.506	1.19532		19_MeOH-Pyridine_1.00		-115.093			-115.572	-115.573	-115.586	-115.588	1.2145		-246.782
19_MeOH-Pyridine_1.05	4.62524			7.467		6.8089	7.28685	7.43339	0.477952	0.624497	0.571355	0.558497	0.545487		-0.180151	-0.0336057	-0.0867483	-0.0996061	-0.112616				1.16852		19_MeOH-Pyridine_1.05	-361.882				-363.454	-363.433	-363.494	-363.506	1.19542		19_MeOH-Pyridine_1.05		-115.093			-115.572	-115.573	-115.586	-115.588	1.2145		-246.782
19_MeOH-Pyridine_1.10	4.64531			7.0711		6.51725	6.93327	7.0716	0.416016	0.554344	0.497356	0.486148	0.474799		-0.13783	0.000497685	-0.05649	-0.0676986	-0.0790475				1.16858		19_MeOH-Pyridine_1.10	-361.882				-363.453	-363.432	-363.494	-363.506	1.19552		19_MeOH-Pyridine_1.10		-115.093			-115.572	-115.573	-115.586	-115.588	1.2145		-246.782
19_MeOH-Pyridine_1.25	4.05996			5.58084		5.24036	5.51005	5.62961	0.269691	0.389252	0.32249	0.315204	0.307798		-0.0707883	0.0487725	-0.0179886	-0.0252753	-0.032681				1.16876		19_MeOH-Pyridine_1.25	-361.881				-363.451	-363.43	-363.491	-363.503	1.19578		19_MeOH-Pyridine_1.25		-115.093			-115.572	-115.573	-115.586	-115.588	1.2145		-246.782
19_MeOH-Pyridine_1.50	2.71811			3.44387		3.27394	3.40296	3.50462	0.129019	0.230679	0.154311	0.150818	0.147249		-0.040913	0.0607471	-0.0156213	-0.0191139	-0.0226826				1.16896		19_MeOH-Pyridine_1.50	-361.879				-363.448	-363.427	-363.488	-363.5	1.19603		19_MeOH-Pyridine_1.50		-115.093			-115.572	-115.573	-115.586	-115.588	1.2145		-246.782
19_MeOH-Pyridine_2.00	1.17742			1.37542		1.31618	1.34949	1.43979	0.0333074	0.123604	0.0398431	0.0389403	0.0380137		-0.0259344	0.0643619	-0.0193987	-0.0203014	-0.021228				1.16912		19_MeOH-Pyridine_2.00	-361.877				-363.444	-363.424	-363.485	-363.497	1.19622		19_MeOH-Pyridine_2.00		-115.093			-115.572	-115.573	-115.586	-115.588	1.2145		-246.782
20_AcOH-AcOH_0.90	13.0791			17.6217		16.7572	17.7528	17.9659	0.995658	1.2087	1.20904	1.18358	1.13634		0.131141	0.344185	0.344522	0.319062	0.271828				1.18874		20_AcOH-AcOH_0.90	-455.833				-457.638	-457.6	-457.661	-457.674	1.21431		20_AcOH-AcOH_0.90		-227.906			-228.805	-228.787	-228.816	-228.823	1.21432		-227.906
20_AcOH-AcOH_0.95	14.9233			18.843		18.1375	19.0535	19.2447	0.916004	1.10724	1.1122	1.08878	1.04544		0.210473	0.401705	0.406669	0.38325	0.339905				1.18862		20_AcOH-AcOH_0.95	-455.835				-457.64	-457.603	-457.663	-457.676	1.21419		20_AcOH-AcOH_0.95		-227.906			-228.805	-228.787	-228.816	-228.823	1.21432		-227.906
20_AcOH-AcOH_1.00	15.7072			19.0556		18.4939	19.3268	19.4964	0.832828	1.00242	1.01112	0.989824	0.950506		0.271201	0.44079	0.449498	0.428197	0.38888				1.18851		20_AcOH-AcOH_1.00	-455.837				-457.64	-457.603	-457.664	-457.677	1.21409		20_AcOH-AcOH_1.00		-227.906			-228.805	-228.787	-228.816	-228.823	1.21432		-227.906
20_AcOH-AcOH_1.05	15.7845			18.6189		18.1826	18.9318	19.0809	0.749262	0.898351	0.909616	0.890445	0.855132		0.312959	0.462048	0.473313	0.454142	0.418829				1.18843		20_AcOH-AcOH_1.05	-455.837				-457.64	-457.603	-457.663	-457.676	1.21402		20_AcOH-AcOH_1.05		-227.906			-228.805	-228.787	-228.816	-228.823	1.21432		-227.906
20_AcOH-AcOH_1.10	15.4018			17.7833		17.4521	18.1202	18.2506	0.668095	0.798476	0.811055	0.793944	0.762497		0.336876	0.467256	0.479836	0.462725	0.431278				1.18837		20_AcOH-AcOH_1.10	-455.836				-457.638	-457.602	-457.662	-457.675	1.21398		20_AcOH-AcOH_1.10		-227.906			-228.805	-228.787	-228.816	-228.823	1.21432		-227.906
20_AcOH-AcOH_1.25	12.9829			14.3399		14.2174	14.671	14.7567	0.453618	0.539364	0.550699	0.539057	0.517714		0.331085	0.416832	0.428166	0.416524	0.395182				1.18835		20_AcOH-AcOH_1.25	-455.832				-457.633	-457.596	-457.656	-457.669	1.21402		20_AcOH-AcOH_1.25		-227.906			-228.805	-228.787	-228.816	-228.823	1.21432		-227.906
20_AcOH-AcOH_1.50	8.56815			9.01798		9.03017	9.24749	9.28834	0.217324	0.258172	0.263868	0.258285	0.248032		0.229511	0.270359	0.276055	0.270472	0.260219				1.18848		20_AcOH-AcOH_1.50	-455.825				-457.624	-457.588	-457.648	-457.66	1.21417		20_AcOH-AcOH_1.50		-227.906			-228.805	-228.787	-228.816	-228.823	1.21432		-227.906
20_AcOH-AcOH_2.00	3.57061			3.50277		3.54818	3.59204	3.59939	0.0438599	0.0512038	0.0532576	0.0521319	0.0500573		0.0892746	0.0966184	0.0986722	0.0975465	0.095472				1.1886		20_AcOH-AcOH_2.00	-455.817				-457.616	-457.579	-457.639	-457.651	1.21427		20_AcOH-AcOH_2.00		-227.906			-228.805	-228.787	-228.816	-228.823	1.21432		-227.906
21_AcNH2-AcNH2_0.90	9.68574			15.0671		14.2014	15.2036	15.39	1.00223	1.18868	1.20802	1.18098	1.14385		0.136533	0.32298	0.342318	0.315281	0.278149				1.17835		21_AcNH2-AcNH2_0.90	-416.144				-417.888	-417.864	-417.924	-417.937	1.20533		21_AcNH2-AcNH2_0.90		-208.064			-208.932	-208.921	-208.95	-208.956	1.20585		-208.064
21_AcNH2-AcNH2_0.95	11.5542			16.0501		15.3864	16.2725	16.4342	0.886061	1.04776	1.06797	1.04404	1.01126		0.222422	0.384123	0.404332	0.380397	0.347622				1.17829		21_AcNH2-AcNH2_0.95	-416.147				-417.89	-417.866	-417.926	-417.939	1.2053		21_AcNH2-AcNH2_0.95		-208.064			-208.932	-208.921	-208.95	-208.956	1.20585		-208.064
21_AcNH2-AcNH2_1.00	12.4591			16.1982		15.6987	16.4762	16.6158	0.777515	0.917055	0.937144	0.916107	0.887378		0.278071	0.41761	0.437699	0.416663	0.387934				1.17825		21_AcNH2-AcNH2_1.00	-416.148				-417.89	-417.866	-417.927	-417.939	1.20531		21_AcNH2-AcNH2_1.00		-208.064			-208.932	-208.921	-208.95	-208.956	1.20585		-208.064
21_AcNH2-AcNH2_1.05	12.7155			15.8113		15.4425	16.1199	16.2399	0.677377	0.797414	0.816465	0.798112	0.77309		0.308596	0.428634	0.447685	0.429332	0.40431				1.17824		21_AcNH2-AcNH2_1.05	-416.149				-417.889	-417.866	-417.926	-417.938	1.20533		21_AcNH2-AcNH2_1.05		-208.064			-208.932	-208.921	-208.95	-208.956	1.20585		-208.064
21_AcNH2-AcNH2_1.10	12.544			15.0986		14.8315	15.4182	15.5213	0.58663	0.689734	0.707112	0.691203	0.669521		0.31959	0.422693	0.440071	0.424163	0.402481				1.17826		21_AcNH2-AcNH2_1.10	-416.149				-417.888	-417.865	-417.925	-417.937	1.20538		21_AcNH2-AcNH2_1.10		-208.064			-208.932	-208.921	-208.95	-208.956	1.20585		-208.064
21_AcNH2-AcNH2_1.25	10.8104			12.2156		12.1324	12.5028	12.5675	0.370473	0.43519	0.44662	0.436551	0.422821		0.287244	0.351961	0.363391	0.353322	0.339592				1.17836		21_AcNH2-AcNH2_1.25	-416.146				-417.884	-417.861	-417.92	-417.932	1.20554		21_AcNH2-AcNH2_1.25		-208.064			-208.932	-208.921	-208.95	-208.956	1.20585		-208.064
21_AcNH2-AcNH2_1.50	7.3823			7.8438		7.86582	8.0294	8.05774	0.163583	0.191915	0.197233	0.192781	0.186697		0.185605	0.213937	0.219255	0.214803	0.208719				1.17849		21_AcNH2-AcNH2_1.50	-416.14				-417.877	-417.854	-417.913	-417.925	1.20571		21_AcNH2-AcNH2_1.50		-208.064			-208.932	-208.921	-208.95	-208.956	1.20585		-208.064
21_AcNH2-AcNH2_2.00	3.01867			2.94768		2.99079	3.01231	3.0151	0.0215135	0.0243111	0.0259411	0.0253556	0.0245534		0.0646242	0.0674218	0.0690518	0.0684663	0.0676641				1.17859		21_AcNH2-AcNH2_2.00	-416.133				-417.869	-417.846	-417.905	-417.917	1.2058		21_AcNH2-AcNH2_2.00		-208.064			-208.932	-208.921	-208.95	-208.956	1.20585		-208.064
22_AcOH-Uracil_0.90	12.9987			18.1476		17.1207	18.2289	18.4585	1.10813	1.33774	1.33889	1.31279	1.26471		0.0812245	0.310831	0.311981	0.285885	0.237803				1.18469		22_AcOH-Uracil_0.90	-640.555				-643.11	-643.04	-643.136	-643.156	1.20824		22_AcOH-Uracil_0.90		-227.906			-228.805	-228.787	-228.816	-228.823	1.21432		-412.628
22_AcOH-Uracil_0.95	14.9345			19.2886		18.4793	19.48	19.6847	1.00064	1.2054	1.20897	1.18538	1.14203		0.191386	0.396151	0.399717	0.376134	0.332776				1.18463		22_AcOH-Uracil_0.95	-640.558				-643.112	-643.042	-643.138	-643.158	1.2082		22_AcOH-Uracil_0.95		-227.906			-228.805	-228.787	-228.816	-228.823	1.21432		-412.628
22_AcOH-Uracil_1.00	15.8309			19.4826		18.8596	19.7557	19.9371	0.896082	1.07753	1.08262	1.06142	1.0227		0.273113	0.45456	0.459653	0.438455	0.399729				1.18452		22_AcOH-Uracil_1.00	-640.559				-643.112	-643.042	-643.138	-643.158	1.20817		22_AcOH-Uracil_1.00		-227.906			-228.805	-228.787	-228.816	-228.823	1.21432		-412.628
22_AcOH-Uracil_1.05	16.0225			19.0597		18.5925	19.3886	19.5488	0.796082	0.956283	0.961798	0.942998	0.908568		0.328897	0.489098	0.494613	0.475814	0.441383				1.18455		22_AcOH-Uracil_1.05	-640.56				-643.111	-643.042	-643.137	-643.157	1.20817		22_AcOH-Uracil_1.05		-227.906			-228.805	-228.787	-228.816	-228.823	1.21432		-412.628
22_AcOH-Uracil_1.10	15.7455			18.2528		17.9125	18.6149	18.7562	0.702377	0.843707	0.848595	0.831993	0.801623		0.362112	0.503442	0.50833	0.491728	0.461358				1.18454		22_AcOH-Uracil_1.10	-640.559				-643.11	-643.041	-643.136	-643.156	1.20818		22_AcOH-Uracil_1.10		-227.906			-228.805	-228.787	-228.816	-228.823	1.21432		-412.628
22_AcOH-Uracil_1.25	13.5608			14.9025		14.8071	15.2728	15.3704	0.465726	0.563367	0.562723	0.55169	0.531534		0.37028	0.46792	0.467276	0.456243	0.436087				1.18458		22_AcOH-Uracil_1.25	-640.556				-643.105	-643.036	-643.131	-643.151	1.20827		22_AcOH-Uracil_1.25		-227.906			-228.805	-228.787	-228.816	-228.823	1.21432		-412.628
22_AcOH-Uracil_1.50	9.30221			9.64766		9.70592	9.92308	9.97813	0.217164	0.272214	0.262427	0.257277	0.24785		0.275424	0.330474	0.320687	0.315537	0.30611				1.18471		22_AcOH-Uracil_1.50	-640.549				-643.096	-643.028	-643.122	-643.142	1.20842		22_AcOH-Uracil_1.50		-227.906			-228.805	-228.787	-228.816	-228.823	1.21432		-412.628
22_AcOH-Uracil_2.00	4.23062			4.04096		4.13112	4.17046	4.19484	0.0393309	0.0637177	0.0475327	0.0466001	0.0448884		0.129493	0.15388	0.137695	0.136762	0.13505				1.18482		22_AcOH-Uracil_2.00	-640.541				-643.087	-643.019	-643.113	-643.133	1.20853		22_AcOH-Uracil_2.00		-227.906			-228.805	-228.787	-228.816	-228.823	1.21432		-412.628
23_AcNH2-Uracil_0.90	12.5307			17.9687		16.9211	18.0278	18.228	1.10667	1.30682	1.33366	1.30705	1.26304		0.0591062	0.259255	0.2861	0.259491	0.215479				1.18107		23_AcNH2-Uracil_0.90	-620.712				-623.237	-623.173	-623.269	-623.288	1.20511		23_AcNH2-Uracil_0.90		-208.064			-208.932	-208.921	-208.95	-208.956	1.20586		-412.628
23_AcNH2-Uracil_0.95	14.4646			19.0154		18.2025	19.1899	19.365	0.987358	1.16246	1.18987	1.1661	1.12687		0.174541	0.349639	0.377053	0.353282	0.314055				1.18103		23_AcNH2-Uracil_0.95	-620.715				-623.238	-623.175	-623.271	-623.29	1.2051		23_AcNH2-Uracil_0.95		-208.064			-208.932	-208.921	-208.95	-208.956	1.20586		-412.628
23_AcNH2-Uracil_1.00	15.4232			19.2035		18.5872	19.462	19.6142	0.874781	1.02701	1.05421	1.03312	0.998387		0.258462	0.410692	0.437887	0.416798	0.382069				1.181		23_AcNH2-Uracil_1.00	-620.717				-623.239	-623.176	-623.271	-623.291	1.20511		23_AcNH2-Uracil_1.00		-208.064			-208.932	-208.921	-208.95	-208.956	1.20586		-412.628
23_AcNH2-Uracil_1.05	15.7099			18.8254		18.3707	19.1403	19.2721	0.769645	0.901418	0.92752	0.908943	0.878396		0.314888	0.44666	0.472762	0.454186	0.423638				1.18099		23_AcNH2-Uracil_1.05	-620.717				-623.238	-623.175	-623.271	-623.29	1.20513		23_AcNH2-Uracil_1.05		-208.064			-208.932	-208.921	-208.95	-208.956	1.20586		-412.628
23_AcNH2-Uracil_1.10	15.5413			18.0895		17.7648	18.4378	18.5516	0.673015	0.786814	0.811089	0.794831	0.768112		0.34831	0.46211	0.486385	0.470126	0.443407				1.181		23_AcNH2-Uracil_1.10	-620.717				-623.237	-623.174	-623.269	-623.289	1.20516		23_AcNH2-Uracil_1.10		-208.064			-208.932	-208.921	-208.95	-208.956	1.20586		-412.628
23_AcNH2-Uracil_1.25	13.6691			14.9856		14.9092	15.3448	15.4173	0.435605	0.508085	0.525027	0.51448	0.497156		0.359257	0.431737	0.448679	0.438132	0.420808				1.18107		23_AcNH2-Uracil_1.25	-620.714				-623.232	-623.17	-623.265	-623.284	1.20528		23_AcNH2-Uracil_1.25		-208.064			-208.932	-208.921	-208.95	-208.956	1.20586		-412.628
23_AcNH2-Uracil_1.50	9.74548			10.0227		10.1021	10.2963	10.3285	0.194238	0.226424	0.234142	0.229432	0.221684		0.273638	0.305825	0.313542	0.308832	0.301084				1.18119		23_AcNH2-Uracil_1.50	-620.708				-623.224	-623.162	-623.256	-623.276	1.20544		23_AcNH2-Uracil_1.50		-208.064			-208.932	-208.921	-208.95	-208.956	1.20586		-412.628
23_AcNH2-Uracil_2.00	4.8212			4.54622		4.65912	4.68427	4.6878	0.0251512	0.0286834	0.0303207	0.0297108	0.028705		0.138053	0.141586	0.143223	0.142613	0.141607				1.18129		23_AcNH2-Uracil_2.00	-620.7				-623.215	-623.153	-623.248	-623.267	1.20554		23_AcNH2-Uracil_2.00		-208.064			-208.932	-208.921	-208.95	-208.956	1.20586		-412.628
24_Benzene-Benzene_pi-pi_0.90	-13.168			4.06874		-2.24776	-0.111966	0.097712	2.13579	2.34547	2.52693	2.47147	2.43758		-4.1807	-3.97102	-3.78957	-3.84502	-3.87891				1.15717		24_Benzene-Benzene_pi-pi_0.90	-461.548				-463.672	-463.635	-463.731	-463.748	1.18313		24_Benzene-Benzene_pi-pi_0.90		-230.784			-231.833	-231.82	-231.865	-231.874	1.18628		-230.784
24_Benzene-Benzene_pi-pi_0.95	-8.18029			5.05595		0.183826	1.86997	2.02818	1.68614	1.84435	1.99581	1.95164	1.92439		-3.18598	-3.02777	-2.87632	-2.92048	-2.94773				1.15746		24_Benzene-Benzene_pi-pi_0.95	-461.556				-463.673	-463.639	-463.734	-463.751	1.18365		24_Benzene-Benzene_pi-pi_0.95		-230.784			-231.833	-231.82	-231.865	-231.874	1.18628		-230.784
24_Benzene-Benzene_pi-pi_1.00	-5.15488			5.07625		1.29257	2.6308	2.75106	1.33823	1.45849	1.58459	1.54929	1.52732		-2.44544	-2.32518	-2.19908	-2.23438	-2.25635				1.15772		24_Benzene-Benzene_pi-pi_1.00	-461.561				-463.673	-463.641	-463.735	-463.752	1.18409		24_Benzene-Benzene_pi-pi_1.00		-230.784			-231.833	-231.82	-231.865	-231.874	1.18628		-230.784
24_Benzene-Benzene_pi-pi_1.05	-3.31022			4.64615		1.6899	2.75635	2.84832	1.06646	1.15842	1.26318	1.2349	1.21715		-1.88979	-1.79783	-1.69307	-1.72135	-1.7391				1.15795		24_Benzene-Benzene_pi-pi_1.05	-461.563				-463.673	-463.642	-463.735	-463.753	1.18446		24_Benzene-Benzene_pi-pi_1.05		-230.784			-231.833	-231.82	-231.865	-231.874	1.18628		-230.784
24_Benzene-Benzene_pi-pi_1.10	-2.18069			4.04634		1.72196	2.57548	2.64618	0.853524	0.92422	1.01123	0.988509	0.974127		-1.47086	-1.40016	-1.31315	-1.33587	-1.35026				1.15815		24_Benzene-Benzene_pi-pi_1.10	-461.565				-463.672	-463.642	-463.735	-463.752	1.18477		24_Benzene-Benzene_pi-pi_1.10		-230.784			-231.833	-231.82	-231.865	-231.874	1.18628		-230.784
24_Benzene-Benzene_pi-pi_1.25	-0.742899			2.28828		1.14357	1.58443	1.61635	0.440865	0.472783	0.522608	0.510784	0.503159		-0.703845	-0.671927	-0.622101	-0.633926	-0.641551				1.15859		24_Benzene-Benzene_pi-pi_1.25	-461.568				-463.669	-463.641	-463.733	-463.751	1.18542		24_Benzene-Benzene_pi-pi_1.25		-230.784			-231.833	-231.82	-231.865	-231.874	1.18628		-230.784
24_Benzene-Benzene_pi-pi_1.50	-0.24137			0.769841		0.387583	0.549404	0.557355	0.161822	0.169772	0.191904	0.187542	0.184687		-0.220437	-0.212487	-0.190355	-0.194717	-0.197572				1.15894		24_Benzene-Benzene_pi-pi_1.50	-461.568				-463.666	-463.64	-463.732	-463.749	1.1859		24_Benzene-Benzene_pi-pi_1.50		-230.784			-231.833	-231.82	-231.865	-231.874	1.18628		-230.784
24_Benzene-Benzene_pi-pi_2.00	-0.0632355			0.128093		0.0568873	0.0914752	0.0920167	0.0345878	0.0351294	0.0410273	0.0400925	0.0394751		-0.0366179	-0.0360763	-0.0301784	-0.0311132	-0.0317306				1.15915		24_Benzene-Benzene_pi-pi_2.00	-461.569				-463.665	-463.639	-463.731	-463.748	1.18618		24_Benzene-Benzene_pi-pi_2.00		-230.784			-231.833	-231.82	-231.865	-231.874	1.18628		-230.784
25_Pyridine-Pyridine_pi-pi_0.90	-12.3382			5.37747		-1.23789	0.921384	1.15084	2.15927	2.38873	2.56013	2.50733	2.46438		-4.45608	-4.22663	-4.05523	-4.10803	-4.15098				1.16119		25_Pyridine-Pyridine_pi-pi_0.90	-493.544				-495.749	-495.696	-495.795	-495.814	1.18564		25_Pyridine-Pyridine_pi-pi_0.90		-246.782			-247.87	-247.849	-247.897	-247.906	1.18849		-246.782
25_Pyridine-Pyridine_pi-pi_0.95	-7.38597			6.34259		1.1951	2.90705	3.08121	1.71195	1.88612	2.03053	1.9883	1.95385		-3.43554	-3.26138	-3.11697	-3.1592	-3.19365				1.16142		25_Pyridine-Pyridine_pi-pi_0.95	-493.552				-495.75	-495.7	-495.798	-495.817	1.18609		25_Pyridine-Pyridine_pi-pi_0.95		-246.782			-247.87	-247.849	-247.897	-247.906	1.18849		-246.782
25_Pyridine-Pyridine_pi-pi_1.00	-4.36631			6.32734		2.29763	3.66105	3.7937	1.36342	1.49607	1.61766	1.58379	1.55607		-2.66629	-2.53364	-2.41205	-2.44592	-2.47363				1.16163		25_Pyridine-Pyridine_pi-pi_1.00	-493.557				-495.75	-495.702	-495.8	-495.818	1.18647		25_Pyridine-Pyridine_pi-pi_1.00		-246.782			-247.87	-247.849	-247.897	-247.906	1.18849		-246.782
25_Pyridine-Pyridine_pi-pi_1.05	-2.52991			5.84107		2.66904	3.75857	3.85993	1.08953	1.19089	1.29305	1.26584	1.24348		-2.0825	-1.98114	-1.87898	-1.90619	-1.92855				1.16182		25_Pyridine-Pyridine_pi-pi_1.05	-493.56				-495.749	-495.702	-495.8	-495.818	1.18679		25_Pyridine-Pyridine_pi-pi_1.05		-246.782			-247.87	-247.849	-247.897	-247.906	1.18849		-246.782
25_Pyridine-Pyridine_pi-pi_1.10	-1.42065			5.16848		2.65687	3.53046	3.60825	0.873587	0.951382	1.03701	1.01511	0.997025		-1.63802	-1.56022	-1.4746	-1.4965	-1.51458				1.162		25_Pyridine-Pyridine_pi-pi_1.10	-493.562				-495.748	-495.702	-495.799	-495.818	1.18707		25_Pyridine-Pyridine_pi-pi_1.10		-246.782			-247.87	-247.849	-247.897	-247.906	1.18849		-246.782
25_Pyridine-Pyridine_pi-pi_1.25	-0.122959			3.20334		1.91206	2.37189	2.40813	0.45983	0.496064	0.546121	0.534502	0.524804		-0.831451	-0.795217	-0.74516	-0.756779	-0.766477				1.16239		25_Pyridine-Pyridine_pi-pi_1.25	-493.564				-495.745	-495.701	-495.798	-495.816	1.18766		25_Pyridine-Pyridine_pi-pi_1.25		-246.782			-247.87	-247.849	-247.897	-247.906	1.18849		-246.782
25_Pyridine-Pyridine_pi-pi_1.50	0.163081			1.28689		0.839731	1.00411	1.01368	0.164382	0.173946	0.195308	0.191132	0.187609		-0.282778	-0.273214	-0.251852	-0.256028	-0.259551				1.16273		25_Pyridine-Pyridine_pi-pi_1.50	-493.564				-495.742	-495.699	-495.795	-495.814	1.18814		25_Pyridine-Pyridine_pi-pi_1.50		-246.782			-247.87	-247.849	-247.897	-247.906	1.18849		-246.782
25_Pyridine-Pyridine_pi-pi_2.00	0.108289			0.315736		0.229247	0.26145	0.262158	0.0322038	0.0329117	0.038271	0.0374507	0.0367542		-0.0542852	-0.0535772	-0.048218	-0.0490382	-0.0497348				1.16293		25_Pyridine-Pyridine_pi-pi_2.00	-493.564				-495.74	-495.698	-495.794	-495.812	1.1884		25_Pyridine-Pyridine_pi-pi_2.00		-246.782			-247.87	-247.849	-247.897	-247.906	1.18849		-246.782
26_Uracil-Uracil_pi-pi_0.90	-7.32648			10.097		4.97007	7.5943	7.95003	2.62423	2.97996	3.15782	3.09969	2.99504		-2.50271	-2.14698	-1.96912	-2.02725	-2.13191				1.18118		26_Uracil-Uracil_pi-pi_0.90	-825.247				-828.569	-828.461	-828.594	-828.621	1.20333		26_Uracil-Uracil_pi-pi_0.90		-412.63			-414.277	-414.226	-414.291	-414.304	1.20553		-412.63
26_Uracil-Uracil_pi-pi_0.95	-2.6419			11.2786		7.1789	9.35686	9.64404	2.17796	2.46513	2.62138	2.57293	2.4857		-1.92174	-1.63457	-1.47832	-1.52677	-1.614				1.18135		26_Uracil-Uracil_pi-pi_0.95	-825.255				-828.571	-828.464	-828.597	-828.624	1.2036		26_Uracil-Uracil_pi-pi_0.95		-412.63			-414.277	-414.226	-414.291	-414.304	1.20553		-412.63
26_Uracil-Uracil_pi-pi_1.00	0.0928504			11.2478		7.9548	9.76698	9.99938	1.81218	2.04459	2.18157	2.14113	2.06824		-1.48078	-1.24838	-1.1114	-1.15184	-1.22472				1.18152		26_Uracil-Uracil_pi-pi_1.00	-825.259				-828.571	-828.465	-828.597	-828.624	1.20384		26_Uracil-Uracil_pi-pi_1.00		-412.63			-414.277	-414.226	-414.291	-414.304	1.20553		-412.63
26_Uracil-Uracil_pi-pi_1.05	1.61952			10.58		7.92422	9.43489	9.62328	1.51067	1.69906	1.81891	1.78511	1.72413		-1.1451	-0.956709	-0.836857	-0.87066	-0.931646				1.18167		26_Uracil-Uracil_pi-pi_1.05	-825.262				-828.57	-828.465	-828.597	-828.624	1.20405		26_Uracil-Uracil_pi-pi_1.05		-412.63			-414.277	-414.226	-414.291	-414.304	1.20553		-412.63
26_Uracil-Uracil_pi-pi_1.10	2.40378			9.62197		7.47016	8.7321	8.88517	1.26193	1.41501	1.51966	1.49135	1.44025		-0.889878	-0.736806	-0.632148	-0.660458	-0.711567				1.1818		26_Uracil-Uracil_pi-pi_1.10	-825.263				-828.569	-828.465	-828.596	-828.622	1.20423		26_Uracil-Uracil_pi-pi_1.10		-412.63			-414.277	-414.226	-414.291	-414.304	1.20553		-412.63
26_Uracil-Uracil_pi-pi_1.25	2.76037			6.59848		5.42142	6.16564	6.24923	0.744224	0.827807	0.896549	0.879777	0.849383		-0.432833	-0.34925	-0.280508	-0.297281	-0.327675				1.18214		26_Uracil-Uracil_pi-pi_1.25	-825.263				-828.564	-828.461	-828.592	-828.618	1.20468		26_Uracil-Uracil_pi-pi_1.25		-412.63			-414.277	-414.226	-414.291	-414.304	1.20553		-412.63
26_Uracil-Uracil_pi-pi_1.50	1.90105			3.33277		2.86051	3.19019	3.22252	0.329678	0.362002	0.397291	0.389834	0.376261		-0.14258	-0.110256	-0.0749666	-0.0824239	-0.0959967				1.18247		26_Uracil-Uracil_pi-pi_1.50	-825.262				-828.559	-828.457	-828.587	-828.613	1.20509		26_Uracil-Uracil_pi-pi_1.50		-412.63			-414.277	-414.226	-414.291	-414.304	1.20553		-412.63
26_Uracil-Uracil_pi-pi_2.00	0.816097			1.0781		0.973992	1.06519	1.07177	0.0911981	0.0977737	0.109928	0.10786	0.104084		-0.0129119	-0.00633622	0.00581797	0.00375003	-2.55744e-05				1.1827		26_Uracil-Uracil_pi-pi_2.00	-825.26				-828.555	-828.454	-828.583	-828.61	1.20538		26_Uracil-Uracil_pi-pi_2.00		-412.63			-414.277	-414.226	-414.291	-414.304	1.20553		-412.63
27_Benzene-Pyridine_pi-pi_0.90	-12.9791			4.68333		-1.82909	0.345989	0.569191	2.17508	2.39828	2.57615	2.52135	2.48242		-4.33734	-4.11414	-3.93627	-3.99106	-4.03				1.1592		27_Benzene-Pyridine_pi-pi_0.90	-477.546				-479.71	-479.666	-479.763	-479.781	1.18439		27_Benzene-Pyridine_pi-pi_0.90		-230.784			-231.833	-231.819	-231.865	-231.874	1.18627		-246.782
27_Benzene-Pyridine_pi-pi_0.95	-7.75821			5.75515		0.749469	2.45737	2.62449	1.7079	1.87503	2.02367	1.98024	1.94922		-3.29778	-3.13065	-2.98201	-3.02544	-3.05645				1.15946		27_Benzene-Pyridine_pi-pi_0.95	-477.554				-479.712	-479.67	-479.766	-479.784	1.18489		27_Benzene-Pyridine_pi-pi_0.95		-230.784			-231.833	-231.819	-231.865	-231.874	1.18627		-246.782
27_Benzene-Pyridine_pi-pi_1.00	-4.65265			5.76503		1.88634	3.23623	3.36223	1.34989	1.47589	1.60003	1.56547	1.54063		-2.5288	-2.4028	-2.27866	-2.31322	-2.33806				1.1597		27_Benzene-Pyridine_pi-pi_1.00	-477.559				-479.712	-479.671	-479.768	-479.785	1.1853		27_Benzene-Pyridine_pi-pi_1.00		-230.784			-231.833	-231.819	-231.865	-231.874	1.18627		-246.782
27_Benzene-Pyridine_pi-pi_1.05	-2.79901			5.28798		2.26116	3.33351	3.42906	1.07235	1.1679	1.27143	1.24383	1.22387		-1.95447	-1.85892	-1.75539	-1.78299	-1.80295				1.15991		27_Benzene-Pyridine_pi-pi_1.05	-477.562				-479.711	-479.672	-479.768	-479.785	1.18565		27_Benzene-Pyridine_pi-pi_1.05		-230.784			-231.833	-231.819	-231.865	-231.874	1.18627		-246.782
27_Benzene-Pyridine_pi-pi_1.10	-1.69209			4.63019		2.25117	3.10719	3.18008	0.856024	0.928915	1.0152	0.993073	0.97698		-1.523	-1.45011	-1.36383	-1.38595	-1.40204				1.1601		27_Benzene-Pyridine_pi-pi_1.10	-477.564				-479.71	-479.672	-479.767	-479.785	1.18595		27_Benzene-Pyridine_pi-pi_1.10		-230.784			-231.833	-231.819	-231.865	-231.874	1.18627		-246.782
27_Benzene-Pyridine_pi-pi_1.25	-0.389152			2.76095		1.55733	2.00614	2.03945	0.448811	0.482122	0.532538	0.520854	0.512227		-0.754802	-0.721491	-0.671074	-0.682759	-0.691385				1.16052		27_Benzene-Pyridine_pi-pi_1.25	-477.566				-479.707	-479.671	-479.766	-479.783	1.18655		27_Benzene-Pyridine_pi-pi_1.25		-230.784			-231.833	-231.819	-231.865	-231.874	1.18627		-246.782
27_Benzene-Pyridine_pi-pi_1.50	-0.0266386			1.02187		0.615841	0.777603	0.785678	0.161762	0.169837	0.192017	0.187783	0.184619		-0.244265	-0.23619	-0.21401	-0.218244	-0.221408				1.16086		27_Benzene-Pyridine_pi-pi_1.50	-477.566				-479.704	-479.669	-479.764	-479.781	1.18703		27_Benzene-Pyridine_pi-pi_1.50		-230.784			-231.833	-231.819	-231.865	-231.874	1.18627		-246.782
27_Benzene-Pyridine_pi-pi_2.00	0.0217229			0.215437		0.139282	0.172241	0.172547	0.0329593	0.0332652	0.0391329	0.0382677	0.0376164		-0.0431961	-0.0428902	-0.0370225	-0.0378877	-0.038539				1.16106		27_Benzene-Pyridine_pi-pi_2.00	-477.566				-479.703	-479.669	-479.763	-479.78	1.18731		27_Benzene-Pyridine_pi-pi_2.00		-230.784			-231.833	-231.819	-231.865	-231.874	1.18627		-246.782
28_Benzene-Uracil_pi-pi_0.90	-11.5379			6.80849		0.755025	3.20012	3.51747	2.4451	2.76245	2.92245	2.86441	2.79059		-3.60837	-3.29102	-3.13102	-3.18906	-3.26288				1.17149		28_Benzene-Uracil_pi-pi_0.90	-643.396				-646.121	-646.047	-646.162	-646.184	1.19523		28_Benzene-Uracil_pi-pi_0.90		-230.784			-231.833	-231.819	-231.865	-231.874	1.18625		-412.63
28_Benzene-Uracil_pi-pi_0.95	-6.65761			7.80743		3.02777	5.0166	5.273	1.98883	2.24523	2.37789	2.33037	2.26985		-2.79084	-2.53443	-2.40178	-2.44929	-2.50981				1.17173		28_Benzene-Uracil_pi-pi_0.95	-643.404				-646.122	-646.051	-646.165	-646.187	1.19562		28_Benzene-Uracil_pi-pi_0.95		-230.784			-231.833	-231.819	-231.865	-231.874	1.18625		-412.63
28_Benzene-Uracil_pi-pi_1.00	-3.67643			7.76736		3.97846	5.60042	5.80932	1.62195	1.83086	1.9398	1.90086	1.85114		-2.16694	-1.95803	-1.8491	-1.88803	-1.93776				1.17196		28_Benzene-Uracil_pi-pi_1.00	-643.409				-646.122	-646.053	-646.166	-646.188	1.19596		28_Benzene-Uracil_pi-pi_1.00		-230.784			-231.833	-231.819	-231.865	-231.874	1.18625		-412.63
28_Benzene-Uracil_pi-pi_1.05	-1.88265			7.19977		4.18527	5.51035	5.68199	1.32508	1.49672	1.58514	1.55321	1.51232		-1.68942	-1.51778	-1.42936	-1.46129	-1.50219				1.17216		28_Benzene-Uracil_pi-pi_1.05	-643.412				-646.121	-646.053	-646.166	-646.188	1.19626		28_Benzene-Uracil_pi-pi_1.05		-230.784			-231.833	-231.819	-231.865	-231.874	1.18625		-412.63
28_Benzene-Uracil_pi-pi_1.10	-0.829518			6.4065		3.99775	5.08249	5.22487	1.08474	1.22712	1.29791	1.27168	1.23801		-1.32401	-1.18163	-1.11084	-1.13707	-1.17074				1.17234		28_Benzene-Uracil_pi-pi_1.10	-643.413				-646.12	-646.053	-646.165	-646.187	1.19651		28_Benzene-Uracil_pi-pi_1.10		-230.784			-231.833	-231.819	-231.865	-231.874	1.18625		-412.63
28_Benzene-Uracil_pi-pi_1.25	0.256051			4.01084		2.74683	3.35069	3.43782	0.603861	0.690987	0.722867	0.708178	0.689186		-0.660145	-0.573018	-0.541138	-0.555828	-0.574819				1.17275		28_Benzene-Uracil_pi-pi_1.25	-643.415				-646.116	-646.051	-646.162	-646.184	1.19708		28_Benzene-Uracil_pi-pi_1.25		-230.784			-231.833	-231.819	-231.865	-231.874	1.18625		-412.63
28_Benzene-Uracil_pi-pi_1.50	0.255641			1.66677		1.18496	1.43416	1.48376	0.249195	0.298792	0.298421	0.292333	0.284406		-0.232612	-0.183014	-0.183385	-0.189473	-0.1974				1.17311		28_Benzene-Uracil_pi-pi_1.50	-643.415				-646.112	-646.048	-646.159	-646.181	1.19754		28_Benzene-Uracil_pi-pi_1.50		-230.784			-231.833	-231.819	-231.865	-231.874	1.18625		-412.63
28_Benzene-Uracil_pi-pi_2.00	0.0285275			0.338314		0.235017	0.297852	0.331166	0.0628349	0.0961486	0.0752659	0.073726	0.0717134		-0.0404622	-0.00714844	-0.0280312	-0.029571	-0.0315836				1.17333		28_Benzene-Uracil_pi-pi_2.00	-643.415				-646.11	-646.047	-646.157	-646.179	1.19784		28_Benzene-Uracil_pi-pi_2.00		-230.784			-231.833	-231.819	-231.865	-231.874	1.18625		-412.63
29_Pyridine-Uracil_pi-pi_0.90	-12.0565			7.17916		0.757778	3.30402	3.64703	2.54624	2.88925	3.04544	2.98666	2.90602		-3.87514	-3.53213	-3.37594	-3.43472	-3.51536				1.17297		29_Pyridine-Uracil_pi-pi_0.90	-659.393				-662.158	-662.077	-662.193	-662.216	1.19606		29_Pyridine-Uracil_pi-pi_0.90		-246.782			-247.87	-247.849	-247.897	-247.906	1.18845		-412.63
29_Pyridine-Uracil_pi-pi_0.95	-5.74746			8.77167		3.91502	5.90613	6.17207	1.99111	2.25705	2.38235	2.33603	2.27245		-2.86554	-2.5996	-2.4743	-2.52062	-2.5842				1.17323		29_Pyridine-Uracil_pi-pi_0.95	-659.403				-662.161	-662.082	-662.198	-662.22	1.19649		29_Pyridine-Uracil_pi-pi_0.95		-246.782			-247.87	-247.849	-247.897	-247.906	1.18845		-412.63
29_Pyridine-Uracil_pi-pi_1.00	-2.23912			8.79932		5.09456	6.66134	6.87025	1.56678	1.77569	1.87522	1.83857	1.78817		-2.13798	-1.92907	-1.82955	-1.86619	-1.9166				1.17347		29_Pyridine-Uracil_pi-pi_1.00	-659.409				-662.161	-662.084	-662.199	-662.221	1.19686		29_Pyridine-Uracil_pi-pi_1.00		-246.782			-247.87	-247.849	-247.897	-247.906	1.18845		-412.63
29_Pyridine-Uracil_pi-pi_1.05	-0.33057			8.11481		5.26722	6.50563	6.67182	1.23841	1.4046	1.48258	1.4535	1.4134		-1.60918	-1.44299	-1.36501	-1.39409	-1.43419				1.17368		29_Pyridine-Uracil_pi-pi_1.05	-659.412				-662.16	-662.084	-662.198	-662.221	1.19716		29_Pyridine-Uracil_pi-pi_1.05		-246.782			-247.87	-247.849	-247.897	-247.906	1.18845		-412.63
29_Pyridine-Uracil_pi-pi_1.10	0.664141			7.1681		4.96214	5.9452	6.07924	0.983065	1.11711	1.17714	1.15397	1.12197		-1.2229	-1.08886	-1.02882	-1.05199	-1.08399				1.17385		29_Pyridine-Uracil_pi-pi_1.10	-659.413				-662.158	-662.084	-662.198	-662.22	1.19742		29_Pyridine-Uracil_pi-pi_1.10		-246.782			-247.87	-247.849	-247.897	-247.906	1.18845		-412.63
29_Pyridine-Uracil_pi-pi_1.25	1.38228			4.47176		3.39756	3.90256	3.98006	0.504995	0.582497	0.604959	0.592986	0.576351		-0.569199	-0.491697	-0.469235	-0.481208	-0.497843				1.17424		29_Pyridine-Uracil_pi-pi_1.25	-659.414				-662.154	-662.081	-662.194	-662.217	1.19795		29_Pyridine-Uracil_pi-pi_1.25		-246.782			-247.87	-247.849	-247.897	-247.906	1.18845		-412.63
29_Pyridine-Uracil_pi-pi_1.50	0.989217			2.02292		1.64563	1.8349	1.87834	0.189277	0.232711	0.22682	0.222315	0.216021		-0.188013	-0.144579	-0.15047	-0.154975	-0.161269				1.17455		29_Pyridine-Uracil_pi-pi_1.50	-659.414				-662.15	-662.078	-662.191	-662.213	1.19835		29_Pyridine-Uracil_pi-pi_1.50		-246.782			-247.87	-247.849	-247.897	-247.906	1.18845		-412.63
29_Pyridine-Uracil_pi-pi_2.00	0.421539			0.602631		0.529864	0.570224	0.601508	0.0403599	0.0716443	0.0483753	0.047412	0.0460628		-0.0324067	-0.00112235	-0.0243914	-0.0253547	-0.0267039				1.17473		29_Pyridine-Uracil_pi-pi_2.00	-659.413				-662.148	-662.076	-662.189	-662.211	1.1986		29_Pyridine-Uracil_pi-pi_2.00		-246.782			-247.87	-247.849	-247.897	-247.906	1.18845		-412.63
30_Benzene-Ethene_0.90	-7.652			2.02376		-1.15908	-0.0294502	0.101524	1.12963	1.2606	1.33803	1.30568	1.28925		-2.05321	-1.92224	-1.84481	-1.87716	-1.8936				1.15585		30_Benzene-Ethene_0.90	-308.838				-310.271	-310.264	-310.324	-310.336	1.18449		30_Benzene-Ethene_0.90		-230.784			-231.833	-231.82	-231.865	-231.874	1.1863		-78.0658
30_Benzene-Ethene_0.95	-4.97145			2.47701		0.0326479	0.926155	1.02671	0.893507	0.994063	1.05866	1.03291	1.01976		-1.55085	-1.4503	-1.3857	-1.41145	-1.4246				1.15602		30_Benzene-Ethene_0.95	-308.842				-310.272	-310.265	-310.326	-310.337	1.18483		30_Benzene-Ethene_0.95		-230.784			-231.833	-231.82	-231.865	-231.874	1.1863		-78.0658
30_Benzene-Ethene_1.00	-3.30379			2.45689		0.568426	1.27793	1.35551	0.709507	0.787087	0.840854	0.820318	0.80976		-1.17896	-1.10138	-1.04761	-1.06815	-1.0787				1.15618		30_Benzene-Ethene_1.00	-308.845				-310.272	-310.266	-310.327	-310.338	1.18512		30_Benzene-Ethene_1.00		-230.784			-231.833	-231.82	-231.865	-231.874	1.1863		-78.0658
30_Benzene-Ethene_1.05	-2.25955			2.21637		0.749435	1.31461	1.37482	0.565175	0.625385	0.669942	0.653523	0.645034		-0.901763	-0.841552	-0.796995	-0.813415	-0.821904				1.15632		30_Benzene-Ethene_1.05	-308.847				-310.272	-310.267	-310.327	-310.338	1.18537		30_Benzene-Ethene_1.05		-230.784			-231.833	-231.82	-231.865	-231.874	1.1863		-78.0658
30_Benzene-Ethene_1.10	-1.60065			1.89612		0.750029	1.20183	1.24891	0.451798	0.498876	0.535644	0.522482	0.515637		-0.694297	-0.647219	-0.610451	-0.623613	-0.630458				1.15645		30_Benzene-Ethene_1.10	-308.848				-310.271	-310.267	-310.326	-310.337	1.18558		30_Benzene-Ethene_1.10		-230.784			-231.833	-231.82	-231.865	-231.874	1.1863		-78.0658
30_Benzene-Ethene_1.25	-0.717398			1.01332		0.447972	0.685387	0.708763	0.237415	0.26079	0.281577	0.274628	0.270962		-0.327935	-0.30456	-0.283773	-0.290723	-0.294389				1.15674		30_Benzene-Ethene_1.25	-308.849				-310.27	-310.266	-310.326	-310.337	1.18601		30_Benzene-Ethene_1.25		-230.784			-231.833	-231.82	-231.865	-231.874	1.1863		-78.0658
30_Benzene-Ethene_1.50	-0.322175			0.298829		0.10202	0.196117	0.204273	0.0940974	0.102254	0.11163	0.108867	0.107393		-0.102712	-0.094556	-0.0851799	-0.0879427	-0.0894163				1.15696		30_Benzene-Ethene_1.50	-308.85				-310.269	-310.266	-310.325	-310.336	1.18632		30_Benzene-Ethene_1.50		-230.784			-231.833	-231.82	-231.865	-231.874	1.1863		-78.0658
30_Benzene-Ethene_2.00	-0.105286			0.0168906		-0.019166	0.00139122	0.00404669	0.0205573	0.0232127	0.0243921	0.0237872	0.023462		-0.0154994	-0.0128439	-0.0116646	-0.0122694	-0.0125947				1.15712		30_Benzene-Ethene_2.00	-308.85				-310.268	-310.265	-310.324	-310.336	1.18654		30_Benzene-Ethene_2.00		-230.784			-231.833	-231.82	-231.865	-231.874	1.1863		-78.0658
31_Uracil-Ethene_0.90	-4.79726			3.68373		1.28003	2.3828	2.51517	1.10277	1.23514	1.32409	1.29646	1.25859		-1.30093	-1.16857	-1.07962	-1.10724	-1.14511				1.17564		31_Uracil-Ethene_0.90	-490.688				-492.718	-492.675	-492.754	-492.77	1.20069		31_Uracil-Ethene_0.90		-412.63			-414.277	-414.227	-414.291	-414.305	1.20559		-78.0657
31_Uracil-Ethene_0.95	-2.57937			4.10548		2.2085	3.10599	3.20885	0.89749	1.00035	1.07782	1.05525	1.0243		-0.999488	-0.896631	-0.819161	-0.841727	-0.872673				1.17578		31_Uracil-Ethene_0.95	-490.692				-492.719	-492.676	-492.755	-492.771	1.20092		31_Uracil-Ethene_0.95		-412.63			-414.277	-414.227	-414.291	-414.305	1.20559		-78.0657
31_Uracil-Ethene_1.00	-1.21651			4.06089		2.55731	3.28834	3.36782	0.731033	0.810513	0.878063	0.859629	0.834328		-0.772551	-0.693071	-0.62552	-0.643955	-0.669256				1.17591		31_Uracil-Ethene_1.00	-490.694				-492.719	-492.677	-492.756	-492.771	1.20113		31_Uracil-Ethene_1.00		-412.63			-414.277	-414.227	-414.291	-414.305	1.20559		-78.0657
31_Uracil-Ethene_1.05	-0.394027			3.77836		2.58221	3.17812	3.23899	0.595904	0.656781	0.71586	0.700801	0.680106		-0.60024	-0.539363	-0.480284	-0.495343	-0.516039				1.17603		31_Uracil-Ethene_1.05	-490.695				-492.719	-492.677	-492.755	-492.771	1.2013		31_Uracil-Ethene_1.05		-412.63			-414.277	-414.227	-414.291	-414.305	1.20559		-78.0657
31_Uracil-Ethene_1.10	0.086941			3.39341		2.43809	2.92463	2.9707	0.48654	0.532607	0.584552	0.572239	0.555288		-0.468777	-0.422709	-0.370765	-0.383078	-0.400029				1.17614		31_Uracil-Ethene_1.10	-490.696				-492.718	-492.677	-492.755	-492.771	1.20145		31_Uracil-Ethene_1.10		-412.63			-414.277	-414.227	-414.291	-414.305	1.20559		-78.0657
31_Uracil-Ethene_1.25	0.553052			2.22703		1.72926	1.99788	2.0151	0.268619	0.285835	0.322814	0.315992	0.306575		-0.229147	-0.21193	-0.174952	-0.181773	-0.191191				1.17636		31_Uracil-Ethene_1.25	-490.697				-492.716	-492.675	-492.754	-492.769	1.20175		31_Uracil-Ethene_1.25		-412.63			-414.277	-414.227	-414.291	-414.305	1.20559		-78.0657
31_Uracil-Ethene_1.50	0.451913			1.03808		0.854923	0.964137	0.960886	0.109214	0.105963	0.131275	0.128496	0.124646		-0.0739411	-0.0771924	-0.0518805	-0.0546593	-0.0585091				1.17655		31_Uracil-Ethene_1.50	-490.697				-492.714	-492.674	-492.752	-492.768	1.20199		31_Uracil-Ethene_1.50		-412.63			-414.277	-414.227	-414.291	-414.305	1.20559		-78.0657
31_Uracil-Ethene_2.00	0.187431			0.286416		0.252211	0.276814	0.264347	0.0246029	0.0121357	0.0295765	0.0289495	0.0280793		-0.00960218	-0.0220694	-0.00462859	-0.00525559	-0.00612579				1.17667		31_Uracil-Ethene_2.00	-490.696				-492.713	-492.673	-492.751	-492.767	1.20216		31_Uracil-Ethene_2.00		-412.63			-414.277	-414.227	-414.291	-414.305	1.20559		-78.0657
32_Uracil-Ethyne_0.90	-3.80914			4.0468		1.59648	2.59881	2.7567	1.00233	1.16022	1.20243	1.17924	1.14396		-1.44799	-1.2901	-1.24789	-1.27107	-1.30636				1.1765		32_Uracil-Ethyne_0.90	-489.474				-491.477	-491.421	-491.502	-491.518	1.19963		32_Uracil-Ethyne_0.90		-412.63			-414.277	-414.227	-414.291	-414.305	1.2056		-76.8501
32_Uracil-Ethyne_0.95	-1.58146			4.52965		2.62456	3.43478	3.56361	0.810226	0.939051	0.972123	0.953312	0.924711		-1.09487	-0.966046	-0.932974	-0.951785	-0.980386				1.1766		32_Uracil-Ethyne_0.95	-489.478				-491.478	-491.423	-491.504	-491.52	1.19982		32_Uracil-Ethyne_0.95		-412.63			-414.277	-414.227	-414.291	-414.305	1.2056		-76.8501
32_Uracil-Ethyne_1.00	-0.278338			4.48711		2.99925	3.65567	3.76169	0.65642	0.762445	0.787687	0.772403	0.749172		-0.831444	-0.725419	-0.700177	-0.715462	-0.738692				1.17669		32_Uracil-Ethyne_1.00	-489.48				-491.478	-491.424	-491.504	-491.52	1.19997		32_Uracil-Ethyne_1.00		-412.63			-414.277	-414.227	-414.291	-414.305	1.2056		-76.8501
32_Uracil-Ethyne_1.05	0.453058			4.17724		3.01061	3.54337	3.63136	0.532757	0.620747	0.639366	0.626938	0.608036		-0.633871	-0.545881	-0.527262	-0.53969	-0.558593				1.17678		32_Uracil-Ethyne_1.05	-489.481				-491.477	-491.424	-491.504	-491.52	1.20011		32_Uracil-Ethyne_1.05		-412.63			-414.277	-414.227	-414.291	-414.305	1.2056		-76.8501
32_Uracil-Ethyne_1.10	0.833294			3.75253		2.8337	3.26719	3.34086	0.433488	0.507159	0.52028	0.51015	0.494739		-0.485343	-0.411671	-0.39855	-0.40868	-0.424091				1.17685		32_Uracil-Ethyne_1.10	-489.482				-491.476	-491.423	-491.503	-491.519	1.20022		32_Uracil-Ethyne_1.10		-412.63			-414.277	-414.227	-414.291	-414.305	1.2056		-76.8501
32_Uracil-Ethyne_1.25	1.02679			2.46265		2.00143	2.23973	2.28541	0.238308	0.283982	0.286075	0.280491	0.271981		-0.22292	-0.177246	-0.175153	-0.180737	-0.189247				1.17701		32_Uracil-Ethyne_1.25	-489.482				-491.474	-491.422	-491.502	-491.518	1.20044		32_Uracil-Ethyne_1.25		-412.63			-414.277	-414.227	-414.291	-414.305	1.2056		-76.8501
32_Uracil-Ethyne_1.50	0.656614			1.14201		0.97934	1.07642	1.10197	0.0970785	0.122633	0.116553	0.114275	0.110796		-0.0655946	-0.04004	-0.0461202	-0.0483981	-0.0518774				1.17714		32_Uracil-Ethyne_1.50	-489.481				-491.472	-491.42	-491.5	-491.516	1.2006		32_Uracil-Ethyne_1.50		-412.63			-414.277	-414.227	-414.291	-414.305	1.2056		-76.8501
32_Uracil-Ethyne_2.00	0.22176			0.302009		0.273014	0.295073	0.311202	0.0220594	0.0381883	0.0264871	0.0259687	0.0251763		-0.00693583	0.00919309	-0.00250813	-0.00302647	-0.00381884				1.17722		32_Uracil-Ethyne_2.00	-489.481				-491.471	-491.419	-491.499	-491.514	1.20072		32_Uracil-Ethyne_2.00		-412.63			-414.277	-414.227	-414.291	-414.305	1.2056		-76.8501
33_Pyridine-Ethene_0.90	-6.85411			2.6446		-0.505359	0.612687	0.742156	1.11805	1.24752	1.32629	1.29554	1.27603		-2.03191	-1.90244	-1.82367	-1.85442	-1.87393				1.15875		33_Pyridine-Ethene_0.90	-324.837				-326.31	-326.294	-326.357	-326.369	1.18626		33_Pyridine-Ethene_0.90		-246.782			-247.87	-247.849	-247.897	-247.906	1.18853		-78.0658
33_Pyridine-Ethene_0.95	-4.4631			2.99403		0.527596	1.42716	1.52774	0.899562	1.00014	1.06738	1.04249	1.02667		-1.56687	-1.46629	-1.39905	-1.42394	-1.43976				1.15889		33_Pyridine-Ethene_0.95	-324.841				-326.31	-326.296	-326.358	-326.37	1.18656		33_Pyridine-Ethene_0.95		-246.782			-247.87	-247.849	-247.897	-247.906	1.18853		-78.0658
33_Pyridine-Ethene_1.00	-2.93575			2.9397		0.998532	1.72452	1.8028	0.725987	0.804266	0.861615	0.841441	0.828569		-1.21518	-1.1369	-1.07956	-1.09973	-1.1126				1.15903		33_Pyridine-Ethene_1.00	-324.843				-326.31	-326.296	-326.359	-326.37	1.18682		33_Pyridine-Ethene_1.00		-246.782			-247.87	-247.849	-247.897	-247.906	1.18853		-78.0658
33_Pyridine-Ethene_1.05	-1.95984			2.68614		1.15123	1.73857	1.79962	0.58734	0.648386	0.697197	0.680821	0.670331		-0.947567	-0.886521	-0.83771	-0.854086	-0.864576				1.15916		33_Pyridine-Ethene_1.05	-324.845				-326.31	-326.297	-326.359	-326.37	1.18704		33_Pyridine-Ethene_1.05		-246.782			-247.87	-247.849	-247.897	-247.906	1.18853		-78.0658
33_Pyridine-Ethene_1.10	-1.33697			2.353		1.13316	1.60966	1.65741	0.476502	0.524252	0.565718	0.552399	0.543831		-0.743341	-0.695591	-0.654124	-0.667444	-0.676012				1.15928		33_Pyridine-Ethene_1.10	-324.846				-326.309	-326.297	-326.358	-326.37	1.18723		33_Pyridine-Ethene_1.10		-246.782			-247.87	-247.849	-247.897	-247.906	1.18853		-78.0658
33_Pyridine-Ethene_1.25	-0.511323			1.39138		0.760706	1.02001	1.04324	0.2593	0.282535	0.307957	0.300671	0.295939		-0.371376	-0.34814	-0.322718	-0.330004	-0.334736				1.15955		33_Pyridine-Ethene_1.25	-324.847				-326.308	-326.296	-326.358	-326.369	1.18765		33_Pyridine-Ethene_1.25		-246.782			-247.87	-247.849	-247.897	-247.906	1.18853		-78.0658
33_Pyridine-Ethene_1.50	-0.197498			0.508414		0.276079	0.379756	0.386592	0.103677	0.110512	0.123166	0.120243	0.118326		-0.128657	-0.121822	-0.109168	-0.112091	-0.114008				1.15979		33_Pyridine-Ethene_1.50	-324.848				-326.306	-326.295	-326.357	-326.368	1.18798		33_Pyridine-Ethene_1.50		-246.782			-247.87	-247.849	-247.897	-247.906	1.18853		-78.0658
33_Pyridine-Ethene_2.00	-0.066682			0.0784723		0.0326152	0.0563821	0.0561669	0.0237669	0.0235517	0.0282396	0.0275682	0.0271252		-0.0220903	-0.0223054	-0.0176175	-0.018289	-0.018732				1.15994		33_Pyridine-Ethene_2.00	-324.848				-326.306	-326.295	-326.356	-326.368	1.18819		33_Pyridine-Ethene_2.00		-246.782			-247.87	-247.849	-247.897	-247.906	1.18853		-78.0658
34_Pentane-Pentane_0.90	-7.75093			3.32768		1.33139	2.77413	2.93981	1.44274	1.60841	1.7118	1.66059	1.6466		-0.553549	-0.387874	-0.284493	-0.335696	-0.34969				1.151		34_Pentane-Pentane_0.90	-392.802				-394.782	-394.83	-394.895	-394.907	1.18649		34_Pentane-Pentane_0.90		-196.407			-197.389	-197.414	-197.445	-197.451	1.18911		-196.407
34_Pentane-Pentane_0.95	-4.87837			3.9502		2.38017	3.5578	3.69127	1.17763	1.3111	1.39775	1.35581	1.34403		-0.392397	-0.258925	-0.17228	-0.214221	-0.225998				1.1513		34_Pentane-Pentane_0.95	-392.806				-394.783	-394.832	-394.896	-394.908	1.18691		34_Pentane-Pentane_0.95		-196.407			-197.389	-197.414	-197.445	-197.451	1.18911		-196.407
34_Pentane-Pentane_1.00	-3.07941			4.01091		2.75994	3.72477	3.83278	0.964824	1.07284	1.14551	1.11104	1.10115		-0.286149	-0.178135	-0.105467	-0.13993	-0.149819				1.15155		34_Pentane-Pentane_1.00	-392.809				-394.784	-394.832	-394.897	-394.909	1.18727		34_Pentane-Pentane_1.00		-196.407			-197.389	-197.414	-197.445	-197.451	1.18911		-196.407
34_Pentane-Pentane_1.05	-1.94473			3.78918		2.78065	3.57388	3.66158	0.793233	0.880928	0.942015	0.913622	0.905317		-0.215296	-0.127601	-0.0665141	-0.0949069	-0.103212				1.15177		34_Pentane-Pentane_1.05	-392.811				-394.783	-394.832	-394.896	-394.908	1.18756		34_Pentane-Pentane_1.05		-196.407			-197.389	-197.414	-197.445	-197.451	1.18911		-196.407
34_Pentane-Pentane_1.10	-1.22827			3.44178		2.61937	3.27424	3.34568	0.654872	0.726305	0.777861	0.754386	0.747405		-0.16754	-0.0961068	-0.044551	-0.0680254	-0.0750064				1.15196		34_Pentane-Pentane_1.10	-392.812				-394.783	-394.832	-394.896	-394.908	1.18781		34_Pentane-Pentane_1.10		-196.407			-197.389	-197.414	-197.445	-197.451	1.18911		-196.407
34_Pentane-Pentane_1.25	-0.305962			2.31737		1.84449	2.22272	2.26207	0.378229	0.417576	0.449451	0.435856	0.431673		-0.0946506	-0.055304	-0.023428	-0.0370236	-0.0412068				1.15236		34_Pentane-Pentane_1.25	-392.814				-394.781	-394.831	-394.894	-394.906	1.18831		34_Pentane-Pentane_1.25		-196.407			-197.389	-197.414	-197.445	-197.451	1.18911		-196.407
34_Pentane-Pentane_1.50	-0.027442			1.09786		0.881702	1.04843	1.06394	0.166729	0.182239	0.198192	0.192187	0.190287		-0.0494333	-0.0339225	-0.0179699	-0.0239755	-0.0258745				1.15269		34_Pentane-Pentane_1.50	-392.814				-394.779	-394.829	-394.892	-394.904	1.18871		34_Pentane-Pentane_1.50		-196.407			-197.389	-197.414	-197.445	-197.451	1.18911		-196.407
34_Pentane-Pentane_2.00	-0.001081			0.290471		0.228906	0.273429	0.276758	0.044523	0.0478518	0.0529372	0.0513314	0.0508141		-0.0170421	-0.0137133	-0.00862791	-0.0102337	-0.010751				1.15292		34_Pentane-Pentane_2.00	-392.814				-394.778	-394.828	-394.891	-394.903	1.18899		34_Pentane-Pentane_2.00		-196.407			-197.389	-197.414	-197.445	-197.451	1.18911		-196.407
35_Neopentane-Pentane_0.90	-5.70355			2.13345		0.778986	1.83921	1.95872	1.06022	1.17973	1.25743	1.22003	1.21003		-0.294238	-0.174732	-0.0970364	-0.134431	-0.144429				1.15073		35_Neopentane-Pentane_0.90	-392.805				-394.788	-394.834	-394.9	-394.912	1.186		35_Neopentane-Pentane_0.90		-196.407			-197.389	-197.414	-197.445	-197.451	1.18912		-196.407
35_Neopentane-Pentane_0.95	-3.42982			2.67019		1.6352	2.48395	2.57829	0.848753	0.943093	1.00692	0.976889	0.968682		-0.186235	-0.0918951	-0.028072	-0.0580987	-0.0663062				1.15097		35_Neopentane-Pentane_0.95	-392.809				-394.789	-394.836	-394.901	-394.913	1.18635		35_Neopentane-Pentane_0.95		-196.407			-197.389	-197.414	-197.445	-197.451	1.18912		-196.407
35_Neopentane-Pentane_1.00	-2.08803			2.72732		1.91909	2.60425	2.67953	0.68516	0.760446	0.813031	0.788742	0.781973		-0.12307	-0.047784	0.0048007	-0.0194875	-0.0262569				1.15118		35_Neopentane-Pentane_1.00	-392.811				-394.789	-394.836	-394.901	-394.913	1.18663		35_Neopentane-Pentane_1.00		-196.407			-197.389	-197.414	-197.445	-197.451	1.18912		-196.407
35_Neopentane-Pentane_1.05	-1.28061			2.56492		1.92231	2.47932	2.5398	0.557014	0.617496	0.661094	0.641318	0.63572		-0.0855942	-0.0251117	0.0184861	-0.00129013	-0.00688812				1.15135		35_Neopentane-Pentane_1.05	-392.812				-394.789	-394.836	-394.901	-394.913	1.18685		35_Neopentane-Pentane_1.05		-196.407			-197.389	-197.414	-197.445	-197.451	1.18912		-196.407
35_Neopentane-Pentane_1.10	-0.789776			2.31401		1.7949	2.25098	2.29981	0.456084	0.504914	0.541386	0.525176	0.520529		-0.0630343	-0.0142046	0.0222681	0.00605783	0.00141034				1.15149		35_Neopentane-Pentane_1.10	-392.813				-394.789	-394.836	-394.9	-394.912	1.18703		35_Neopentane-Pentane_1.10		-196.407			-197.389	-197.414	-197.445	-197.451	1.18912		-196.407
35_Neopentane-Pentane_1.25	-0.187877			1.53284		1.23786	1.49851	1.52488	0.260642	0.287018	0.309482	0.3002	0.297471		-0.034335	-0.0079591	0.0145049	0.00522264	0.00249372				1.15177		35_Neopentane-Pentane_1.25	-392.814				-394.787	-394.835	-394.899	-394.911	1.18738		35_Neopentane-Pentane_1.25		-196.407			-197.389	-197.414	-197.445	-197.451	1.18912		-196.407
35_Neopentane-Pentane_1.50	-0.0169031			0.724701		0.587858	0.70349	0.714011	0.115631	0.126152	0.137331	0.133208	0.13197		-0.0212117	-0.0106904	0.000488297	-0.00363462	-0.00487303				1.15201		35_Neopentane-Pentane_1.50	-392.814				-394.786	-394.834	-394.898	-394.91	1.18767		35_Neopentane-Pentane_1.50		-196.407			-197.389	-197.414	-197.445	-197.451	1.18912		-196.407
35_Neopentane-Pentane_2.00	-0.00133932			0.197621		0.157388	0.189342	0.191956	0.0319538	0.034568	0.0379566	0.0368162	0.0364688		-0.00827873	-0.00566448	-0.00227587	-0.00341633	-0.00376367				1.15217		35_Neopentane-Pentane_2.00	-392.814				-394.785	-394.833	-394.897	-394.909	1.18786		35_Neopentane-Pentane_2.00		-196.407			-197.389	-197.414	-197.445	-197.451	1.18912		-196.407
36_Neopentane-Neopentane_0.90	-3.47618			1.50958		0.724361	1.43828	1.51954	0.713915	0.795176	0.846377	0.821344	0.814791		-0.0713085	0.009953	0.0611537	0.0361213	0.0295676				1.15048		36_Neopentane-Neopentane_0.90	-392.809				-394.795	-394.839	-394.905	-394.917	1.18554		36_Neopentane-Neopentane_0.90		-196.407			-197.396	-197.419	-197.451	-197.457	1.18681		-196.407
36_Neopentane-Neopentane_0.95	-2.22533			1.75701		1.13832	1.72298	1.78868	0.584658	0.650357	0.693257	0.672725	0.66727		-0.0340257	0.0316729	0.0745737	0.0540414	0.0485865				1.15063		36_Neopentane-Neopentane_0.95	-392.811				-394.795	-394.84	-394.905	-394.917	1.18575		36_Neopentane-Neopentane_0.95		-196.407			-197.396	-197.419	-197.451	-197.457	1.18681		-196.407
36_Neopentane-Neopentane_1.00	-1.43475			1.77698		1.2815	1.76287	1.81626	0.481371	0.534758	0.570866	0.553942	0.549389		-0.0141076	0.0392797	0.0753871	0.0584639	0.0539101				1.15076		36_Neopentane-Neopentane_1.00	-392.812				-394.795	-394.84	-394.905	-394.918	1.18592		36_Neopentane-Neopentane_1.00		-196.407			-197.396	-197.419	-197.451	-197.457	1.18681		-196.407
36_Neopentane-Neopentane_1.05	-0.930608			1.68111		1.27913	1.67736	1.72083	0.398233	0.441703	0.472325	0.45831	0.454503		-0.00374726	0.0397227	0.0703447	0.0563301	0.052523				1.15086		36_Neopentane-Neopentane_1.05	-392.813				-394.795	-394.84	-394.905	-394.917	1.18605		36_Neopentane-Neopentane_1.05		-196.407			-197.396	-197.419	-197.451	-197.457	1.18681		-196.407
36_Neopentane-Neopentane_1.10	-0.60792			1.53275		1.20296	1.53413	1.56956	0.331179	0.366601	0.392831	0.38117	0.377974		0.00138441	0.0368073	0.0630367	0.0513758	0.0481799				1.15095		36_Neopentane-Neopentane_1.10	-392.814				-394.795	-394.84	-394.905	-394.917	1.18616		36_Neopentane-Neopentane_1.10		-196.407			-197.396	-197.419	-197.451	-197.457	1.18681		-196.407
36_Neopentane-Neopentane_1.25	-0.179167			1.04892		0.855674	1.05185	1.07128	0.19618	0.215608	0.232745	0.225829	0.2239		0.00293348	0.0223619	0.0394984	0.0325822	0.0306537				1.15113		36_Neopentane-Neopentane_1.25	-392.814				-394.794	-394.839	-394.904	-394.916	1.18638		36_Neopentane-Neopentane_1.25		-196.407			-197.396	-197.419	-197.451	-197.457	1.18681		-196.407
36_Neopentane-Neopentane_1.50	-0.0334967			0.512223		0.418233	0.507517	0.515422	0.0892836	0.0971891	0.105943	0.102792	0.101899		-0.00470581	0.00319966	0.0119538	0.0088028	0.00790996				1.1513		36_Neopentane-Neopentane_1.50	-392.815				-394.793	-394.839	-394.903	-394.915	1.18659		36_Neopentane-Neopentane_1.50		-196.407			-197.396	-197.419	-197.451	-197.457	1.18681		-196.407
36_Neopentane-Neopentane_2.00	-0.00619165			0.1417		0.112929	0.137463	0.139284	0.0245339	0.0263558	0.0291153	0.0282488	0.0280005		-0.00423698	-0.00241505	0.00034447	-0.000522065	-0.000770347				1.15142		36_Neopentane-Neopentane_2.00	-392.815				-394.793	-394.838	-394.903	-394.915	1.18674		36_Neopentane-Neopentane_2.00		-196.407			-197.396	-197.419	-197.451	-197.457	1.18681		-196.407
37_Cyclopentane-Neopentane_0.90	-5.88421			1.92907		0.53065	1.58672	1.70192	1.05607	1.17127	1.25287	1.21662	1.2053		-0.342349	-0.227157	-0.145551	-0.181805	-0.193126				1.15202		37_Cyclopentane-Neopentane_0.90	-391.631				-393.587	-393.623	-393.69	-393.702	1.18635		37_Cyclopentane-Neopentane_0.90		-195.233			-196.188	-196.204	-196.236	-196.242	1.18989		-196.407
37_Cyclopentane-Neopentane_0.95	-3.63248			2.45467		1.38617	2.23231	2.32324	0.846133	0.937061	1.00411	0.974974	0.965691		-0.222362	-0.131434	-0.0643831	-0.0935213	-0.102803				1.15227		37_Cyclopentane-Neopentane_0.95	-391.634				-393.588	-393.625	-393.691	-393.703	1.18671		37_Cyclopentane-Neopentane_0.95		-195.233			-196.188	-196.204	-196.236	-196.242	1.18989		-196.407
37_Cyclopentane-Neopentane_1.00	-2.27843			2.53895		1.70344	2.38832	2.46099	0.684878	0.757555	0.812946	0.789309	0.781652		-0.150633	-0.0779555	-0.0225646	-0.0462023	-0.0538592				1.15248		37_Cyclopentane-Neopentane_1.00	-391.637				-393.588	-393.625	-393.691	-393.704	1.18699		37_Cyclopentane-Neopentane_1.00		-195.233			-196.188	-196.204	-196.236	-196.242	1.18989		-196.407
37_Cyclopentane-Neopentane_1.05	-1.44424			2.41612		1.75046	2.30928	2.3678	0.558819	0.61734	0.663443	0.644123	0.63778		-0.10684	-0.0483193	-0.00221673	-0.0215363	-0.0278789				1.15265		37_Cyclopentane-Neopentane_1.05	-391.638				-393.588	-393.625	-393.691	-393.703	1.18722		37_Cyclopentane-Neopentane_1.05		-195.233			-196.188	-196.204	-196.236	-196.242	1.18989		-196.407
37_Cyclopentane-Neopentane_1.10	-0.923386			2.20428		1.66544	2.12481	2.17215	0.459374	0.506707	0.545462	0.529566	0.524283		-0.0794632	-0.03213	0.00662473	-0.00927094	-0.0145537				1.1528		37_Cyclopentane-Neopentane_1.10	-391.639				-393.588	-393.625	-393.691	-393.703	1.1874		37_Cyclopentane-Neopentane_1.10		-195.233			-196.188	-196.204	-196.236	-196.242	1.18989		-196.407
37_Cyclopentane-Neopentane_1.25	-0.249746			1.50325		1.19649	1.46189	1.48716	0.265399	0.290669	0.315229	0.306027	0.3029		-0.0413653	-0.0160953	0.00846397	-0.000737988	-0.00386439				1.15308		37_Cyclopentane-Neopentane_1.25	-391.64				-393.586	-393.625	-393.69	-393.702	1.18775		37_Cyclopentane-Neopentane_1.25		-195.233			-196.188	-196.204	-196.236	-196.242	1.18989		-196.407
37_Cyclopentane-Neopentane_1.50	-0.0322085			0.732344		0.589798	0.708828	0.717985	0.119031	0.128188	0.141412	0.137279	0.13585		-0.0235154	-0.0143582	-0.00113398	-0.00526684	-0.0066964				1.15331		37_Cyclopentane-Neopentane_1.50	-391.64				-393.585	-393.624	-393.689	-393.701	1.18803		37_Cyclopentane-Neopentane_1.50		-195.233			-196.188	-196.204	-196.236	-196.242	1.18989		-196.407
37_Cyclopentane-Neopentane_2.00	-0.0034035			0.201346		0.158841	0.191706	0.192581	0.032865	0.0337404	0.0390511	0.0379088	0.0375088		-0.00963999	-0.00876464	-0.00345395	-0.0045962	-0.00499616				1.15347		37_Cyclopentane-Neopentane_2.00	-391.64				-393.584	-393.623	-393.688	-393.7	1.18823		37_Cyclopentane-Neopentane_2.00		-195.233			-196.188	-196.204	-196.236	-196.242	1.18989		-196.407
38_Cyclopentane-Cyclopentane_0.90	-6.13976			2.61995		0.997854	2.18666	2.32119	1.1888	1.32333	1.41194	1.37188	1.35678		-0.433294	-0.298761	-0.210157	-0.250218	-0.265316				1.154		38_Cyclopentane-Cyclopentane_0.90	-390.456				-392.38	-392.409	-392.476	-392.488	1.1877		38_Cyclopentane-Cyclopentane_0.90		-195.233			-196.188	-196.204	-196.236	-196.242	1.18987		-195.233
38_Cyclopentane-Cyclopentane_0.95	-3.96905			3.11124		1.82031	2.80206	2.91161	0.981746	1.0913	1.16634	1.13317	1.12047		-0.309182	-0.199627	-0.124583	-0.157757	-0.170461				1.15424		38_Cyclopentane-Cyclopentane_0.95	-390.459				-392.381	-392.41	-392.477	-392.489	1.18803		38_Cyclopentane-Cyclopentane_0.95		-195.233			-196.188	-196.204	-196.236	-196.242	1.18987		-195.233
38_Cyclopentane-Cyclopentane_1.00	-2.43976			3.18388		2.16997	2.96516	3.05273	0.795194	0.882759	0.944966	0.918028	0.907555		-0.218716	-0.131151	-0.0689449	-0.0958826	-0.106355				1.15447		38_Cyclopentane-Cyclopentane_1.00	-390.462				-392.381	-392.411	-392.477	-392.489	1.18835		38_Cyclopentane-Cyclopentane_1.00		-195.233			-196.188	-196.204	-196.236	-196.242	1.18987		-195.233
38_Cyclopentane-Cyclopentane_1.05	-1.4831			2.99537		2.1919	2.83526	2.90521	0.643357	0.713308	0.764701	0.742871	0.734263		-0.160112	-0.0901611	-0.0387681	-0.0605975	-0.0692056				1.15468		38_Cyclopentane-Cyclopentane_1.05	-390.463				-392.38	-392.411	-392.477	-392.489	1.18861		38_Cyclopentane-Cyclopentane_1.05		-195.233			-196.188	-196.204	-196.236	-196.242	1.18987		-195.233
38_Cyclopentane-Cyclopentane_1.10	-0.907248			2.69842		2.0509	2.57525	2.63147	0.524349	0.580575	0.623357	0.605539	0.598439		-0.12317	-0.0669441	-0.0241618	-0.0419799	-0.0490796				1.15484		38_Cyclopentane-Cyclopentane_1.10	-390.464				-392.38	-392.41	-392.476	-392.489	1.18882		38_Cyclopentane-Cyclopentane_1.10		-195.233			-196.188	-196.204	-196.236	-196.242	1.18987		-195.233
38_Cyclopentane-Cyclopentane_1.25	-0.210465			1.77602		1.41001	1.70627	1.73599	0.29626	0.325984	0.35232	0.342231	0.338122		-0.0697482	-0.0400244	-0.0136886	-0.0237775	-0.0278866				1.15517		38_Cyclopentane-Cyclopentane_1.25	-390.465				-392.378	-392.409	-392.475	-392.487	1.18922		38_Cyclopentane-Cyclopentane_1.25		-195.233			-196.188	-196.204	-196.236	-196.242	1.18987		-195.233
38_Cyclopentane-Cyclopentane_1.50	-0.0167114			0.829857		0.662434	0.791893	0.802932	0.129459	0.140498	0.153997	0.149581	0.147752		-0.0379638	-0.0269245	-0.0134262	-0.0178419	-0.0196712				1.15543		38_Cyclopentane-Cyclopentane_1.50	-390.466				-392.377	-392.408	-392.473	-392.486	1.18954		38_Cyclopentane-Cyclopentane_1.50		-195.233			-196.188	-196.204	-196.236	-196.242	1.18987		-195.233
38_Cyclopentane-Cyclopentane_2.00	-0.000843041			0.222577		0.173483	0.208623	0.210781	0.0351402	0.0372986	0.0418084	0.0406084	0.0401056		-0.0139545	-0.0117961	-0.00728628	-0.00848629	-0.00898914				1.15561		38_Cyclopentane-Cyclopentane_2.00	-390.466				-392.376	-392.407	-392.473	-392.485	1.18976		38_Cyclopentane-Cyclopentane_2.00		-195.233			-196.188	-196.204	-196.236	-196.242	1.18987		-195.233
39_Benzene-Cyclopentane_0.90	-8.44621			4.04139		0.467428	2.04994	2.2201	1.58251	1.75267	1.87569	1.82867	1.80612		-1.99145	-1.82129	-1.69827	-1.74529	-1.76784				1.15555		39_Benzene-Cyclopentane_0.90	-426.004				-428.027	-428.024	-428.105	-428.12	1.18526		39_Benzene-Cyclopentane_0.90		-230.784			-231.833	-231.819	-231.865	-231.874	1.18626		-195.233
39_Benzene-Cyclopentane_0.95	-5.15856			4.7222		1.89243	3.17542	3.3119	1.28299	1.41946	1.52123	1.48292	1.46428		-1.54677	-1.4103	-1.30853	-1.34684	-1.36549				1.15583		39_Benzene-Cyclopentane_0.95	-426.009				-428.028	-428.026	-428.107	-428.122	1.18569		39_Benzene-Cyclopentane_0.95		-230.784			-231.833	-231.819	-231.865	-231.874	1.18626		-195.233
39_Benzene-Cyclopentane_1.00	-3.05974			4.73843		2.49879	3.53464	3.64436	1.03585	1.14557	1.22859	1.19752	1.18221		-1.20379	-1.09407	-1.01105	-1.04212	-1.05743				1.15608		39_Benzene-Cyclopentane_1.00	-426.012				-428.028	-428.027	-428.107	-428.122	1.18607		39_Benzene-Cyclopentane_1.00		-230.784			-231.833	-231.819	-231.865	-231.874	1.18626		-195.233
39_Benzene-Cyclopentane_1.05	-1.75176			4.39711		2.62214	3.45577	3.54444	0.833635	0.922296	0.989026	0.96394	0.951427		-0.94134	-0.852679	-0.785949	-0.811035	-0.823548				1.15631		39_Benzene-Cyclopentane_1.05	-426.014				-428.027	-428.027	-428.107	-428.122	1.1864		39_Benzene-Cyclopentane_1.05		-230.784			-231.833	-231.819	-231.865	-231.874	1.18626		-195.233
39_Benzene-Cyclopentane_1.10	-0.974736			3.91375		2.49284	3.16724	3.23981	0.674398	0.74697	0.800292	0.779949	0.769691		-0.746511	-0.673939	-0.620617	-0.640961	-0.651218				1.15651		39_Benzene-Cyclopentane_1.10	-426.016				-428.027	-428.027	-428.107	-428.121	1.18668		39_Benzene-Cyclopentane_1.10		-230.784			-231.833	-231.819	-231.865	-231.874	1.18626		-195.233
39_Benzene-Cyclopentane_1.25	-0.0851738			2.48986		1.72199	2.09193	2.1343	0.369939	0.412304	0.439195	0.427989	0.422211		-0.397926	-0.35556	-0.328669	-0.339875	-0.345654				1.15692		39_Benzene-Cyclopentane_1.25	-426.017				-428.024	-428.026	-428.105	-428.12	1.18721		39_Benzene-Cyclopentane_1.25		-230.784			-231.833	-231.819	-231.865	-231.874	1.18626		-195.233
39_Benzene-Cyclopentane_1.50	0.0877203			1.09175		0.779378	0.932137	0.953328	0.152759	0.17395	0.181417	0.176776	0.174344		-0.159615	-0.138424	-0.130957	-0.135598	-0.13803				1.15722		39_Benzene-Cyclopentane_1.50	-426.017				-428.022	-428.024	-428.103	-428.118	1.18761		39_Benzene-Cyclopentane_1.50		-230.784			-231.833	-231.819	-231.865	-231.874	1.18626		-195.233
39_Benzene-Cyclopentane_2.00	0.0358203			0.244492		0.176593	0.211706	0.223819	0.0351135	0.0472262	0.0417102	0.040641	0.040075		-0.0327861	-0.0206734	-0.0261894	-0.0272586	-0.0278246				1.15742		39_Benzene-Cyclopentane_2.00	-426.017				-428.021	-428.023	-428.102	-428.117	1.18787		39_Benzene-Cyclopentane_2.00		-230.784			-231.833	-231.819	-231.865	-231.874	1.18626		-195.233
40_Benzene-Neopentane_0.90	-6.29122			3.21648		0.595623	1.82759	1.95358	1.23197	1.35795	1.45917	1.42151	1.40604		-1.38889	-1.2629	-1.16168	-1.19935	-1.21481				1.15385		40_Benzene-Neopentane_0.90	-427.182				-429.234	-429.239	-429.32	-429.334	1.18443		40_Benzene-Neopentane_0.90		-230.784			-231.833	-231.819	-231.865	-231.874	1.18627		-196.407
40_Benzene-Neopentane_0.95	-3.73874			3.73543		1.66908	2.66458	2.7646	0.995499	1.09552	1.17945	1.14889	1.13616		-1.07085	-0.970834	-0.886906	-0.917465	-0.930188				1.15408		40_Benzene-Neopentane_0.95	-427.186				-429.235	-429.241	-429.321	-429.336	1.18478		40_Benzene-Neopentane_0.95		-230.784			-231.833	-231.819	-231.865	-231.874	1.18627		-196.407
40_Benzene-Neopentane_1.00	-2.17757			3.73479		2.0917	2.89844	2.97846	0.806746	0.886758	0.956055	0.931219	0.920739		-0.836345	-0.756333	-0.687036	-0.711873	-0.722352				1.15429		40_Benzene-Neopentane_1.00	-427.188				-429.235	-429.242	-429.321	-429.336	1.18508		40_Benzene-Neopentane_1.00		-230.784			-231.833	-231.819	-231.865	-231.874	1.18627		-196.407
40_Benzene-Neopentane_1.05	-1.2246			3.47953		2.1628	2.81811	2.8825	0.655303	0.719694	0.776747	0.756521	0.747897		-0.66142	-0.597029	-0.539976	-0.560202	-0.568826				1.15446		40_Benzene-Neopentane_1.05	-427.19				-429.234	-429.242	-429.321	-429.336	1.18533		40_Benzene-Neopentane_1.05		-230.784			-231.833	-231.819	-231.865	-231.874	1.18627		-196.407
40_Benzene-Neopentane_1.10	-0.648535			3.11943		2.05584	2.59002	2.64206	0.534174	0.586221	0.633279	0.616763	0.609653		-0.529411	-0.477364	-0.430306	-0.446822	-0.453932				1.15461		40_Benzene-Neopentane_1.10	-427.191				-429.234	-429.242	-429.321	-429.336	1.18553		40_Benzene-Neopentane_1.10		-230.784			-231.833	-231.819	-231.865	-231.874	1.18627		-196.407
40_Benzene-Neopentane_1.25	0.012053			2.02899		1.44401	1.74233	1.76996	0.298329	0.325952	0.353794	0.344543	0.340483		-0.286651	-0.259027	-0.231185	-0.240437	-0.244497				1.15491		40_Benzene-Neopentane_1.25	-427.192				-429.232	-429.241	-429.32	-429.334	1.18592		40_Benzene-Neopentane_1.25		-230.784			-231.833	-231.819	-231.865	-231.874	1.18627		-196.407
40_Benzene-Neopentane_1.50	0.115388			0.924482		0.678926	0.805543	0.81598	0.126617	0.137054	0.150195	0.14626	0.144508		-0.118939	-0.108502	-0.0953605	-0.0992957	-0.101048				1.15514		40_Benzene-Neopentane_1.50	-427.192				-429.23	-429.24	-429.318	-429.333	1.18622		40_Benzene-Neopentane_1.50		-230.784			-231.833	-231.819	-231.865	-231.874	1.18627		-196.407
40_Benzene-Neopentane_2.00	0.0468484			0.237143		0.176029	0.207872	0.211128	0.031843	0.0350991	0.0377795	0.0367882	0.0363424		-0.0292703	-0.0260142	-0.0233337	-0.0243251	-0.0247709				1.1553		40_Benzene-Neopentane_2.00	-427.192				-429.229	-429.239	-429.317	-429.332	1.18643		40_Benzene-Neopentane_2.00		-230.784			-231.833	-231.819	-231.865	-231.874	1.18627		-196.407
41_Uracil-Pentane_0.90	-8.15027			4.99614		1.91936	3.79418	3.96973	1.87482	2.05038	2.24409	2.19212	2.13974		-1.20196	-1.02641	-0.832696	-0.884663	-0.937046				1.16924		41_Uracil-Pentane_0.90	-609.024				-611.674	-611.644	-611.743	-611.762	1.19696		41_Uracil-Pentane_0.90		-412.63			-414.277	-414.227	-414.291	-414.305	1.20556		-196.407
41_Uracil-Pentane_0.95	-4.98323			5.59833		3.14085	4.68968	4.82262	1.54884	1.68177	1.85443	1.81135	1.76769		-0.908644	-0.775712	-0.603046	-0.646132	-0.689794				1.16949		41_Uracil-Pentane_0.95	-609.029				-611.675	-611.646	-611.744	-611.764	1.19731		41_Uracil-Pentane_0.95		-412.63			-414.277	-414.227	-414.291	-414.305	1.20556		-196.407
41_Uracil-Pentane_1.00	-2.99419			5.54794		3.57392	4.85404	4.95238	1.28013	1.37846	1.53309	1.49739	1.46101		-0.693898	-0.595564	-0.440935	-0.476635	-0.513016				1.16972		41_Uracil-Pentane_1.00	-609.033				-611.675	-611.646	-611.744	-611.764	1.19761		41_Uracil-Pentane_1.00		-412.63			-414.277	-414.227	-414.291	-414.305	1.20556		-196.407
41_Uracil-Pentane_1.05	-1.74995			5.15994		3.56695	4.62494	4.69513	1.05799	1.12818	1.26733	1.23777	1.20749		-0.535004	-0.464818	-0.325664	-0.35523	-0.385509				1.16992		41_Uracil-Pentane_1.05	-609.035				-611.674	-611.646	-611.744	-611.763	1.19786		41_Uracil-Pentane_1.05		-412.63			-414.277	-414.227	-414.291	-414.305	1.20556		-196.407
41_Uracil-Pentane_1.10	-0.870893			4.50922		3.26876	4.11182	4.15529	0.843056	0.886524	1.01009	0.986477	0.96218		-0.397399	-0.353932	-0.23037	-0.253979	-0.278275				1.17012		41_Uracil-Pentane_1.10	-609.036				-611.673	-611.646	-611.743	-611.763	1.19812		41_Uracil-Pentane_1.10		-412.63			-414.277	-414.227	-414.291	-414.305	1.20556		-196.407
41_Uracil-Pentane_1.25	-0.0168294			2.67026		2.04099	2.48494	2.48061	0.443957	0.439618	0.532144	0.519669	0.506688		-0.185319	-0.189658	-0.0971315	-0.109606	-0.122588				1.17054		41_Uracil-Pentane_1.25	-609.037				-611.67	-611.644	-611.741	-611.76	1.19864		41_Uracil-Pentane_1.25		-412.63			-414.277	-414.227	-414.291	-414.305	1.20556		-196.407
41_Uracil-Pentane_1.50	0.0701625			1.08333		0.834403	1.01101	0.976803	0.176606	0.1424	0.211755	0.206781	0.201561		-0.0723239	-0.10653	-0.0371749	-0.0421489	-0.0473694				1.17086		41_Uracil-Pentane_1.50	-609.037				-611.667	-611.642	-611.738	-611.757	1.19902		41_Uracil-Pentane_1.50		-412.63			-414.277	-414.227	-414.291	-414.305	1.20556		-196.407
41_Uracil-Pentane_2.00	0.0187943			0.250251		0.190874	0.233941	0.187473	0.0430665	-0.00340126	0.051648	0.050433	0.0491518		-0.0163102	-0.0627779	-0.0077287	-0.00894371	-0.0102249				1.17105		41_Uracil-Pentane_2.00	-609.037				-611.666	-611.641	-611.737	-611.756	1.19926		41_Uracil-Pentane_2.00		-412.63			-414.277	-414.227	-414.291	-414.305	1.20556		-196.407
42_Uracil-Cyclopentane_0.90	-7.86215			4.18914		1.30068	3.02109	3.18866	1.7204	1.88798	2.06014	2.01397	1.9635		-1.16805	-1.00047	-0.828319	-0.874482	-0.924958				1.17064		42_Uracil-Cyclopentane_0.90	-607.851				-610.472	-610.433	-610.532	-610.552	1.19747		42_Uracil-Cyclopentane_0.90		-412.63			-414.277	-414.227	-414.291	-414.305	1.20556		-195.233
42_Uracil-Cyclopentane_0.95	-4.69285			4.83575		2.57006	3.97159	4.09808	1.40153	1.52802	1.67878	1.64105	1.59957		-0.864162	-0.737673	-0.586906	-0.62464	-0.666125				1.1709		42_Uracil-Cyclopentane_0.95	-607.856				-610.473	-610.435	-610.534	-610.553	1.19782		42_Uracil-Cyclopentane_0.95		-412.63			-414.277	-414.227	-414.291	-414.305	1.20556		-195.233
42_Uracil-Cyclopentane_1.00	-2.78036			4.80293		3.00791	4.15282	4.24697	1.14492	1.23906	1.37175	1.34083	1.30669		-0.6501	-0.555952	-0.423269	-0.454182	-0.488324				1.17112		42_Uracil-Cyclopentane_1.00	-607.859				-610.473	-610.435	-610.534	-610.554	1.19812		42_Uracil-Cyclopentane_1.00		-412.63			-414.277	-414.227	-414.291	-414.305	1.20556		-195.233
42_Uracil-Cyclopentane_1.05	-1.62464			4.44521		3.01031	3.94778	4.0164	0.937468	1.00609	1.12344	1.09808	1.06993		-0.49743	-0.428814	-0.311463	-0.336823	-0.364966				1.17132		42_Uracil-Cyclopentane_1.05	-607.861				-610.472	-610.435	-610.534	-610.553	1.19837		42_Uracil-Cyclopentane_1.05		-412.63			-414.277	-414.227	-414.291	-414.305	1.20556		-195.233
42_Uracil-Cyclopentane_1.10	-0.929862			3.95913		2.80178	3.57179	3.62027	0.770006	0.818491	0.922917	0.902046	0.878808		-0.387347	-0.338861	-0.234436	-0.255306	-0.278545				1.17148		42_Uracil-Cyclopentane_1.10	-607.862				-610.471	-610.435	-610.533	-610.553	1.19858		42_Uracil-Cyclopentane_1.10		-412.63			-414.277	-414.227	-414.291	-414.305	1.20556		-195.233
42_Uracil-Cyclopentane_1.25	-0.121632			2.53003		1.89255	2.32894	2.3387	0.436386	0.446154	0.523241	0.511379	0.498047		-0.201096	-0.191328	-0.11424	-0.126103	-0.139434				1.17185		42_Uracil-Cyclopentane_1.25	-607.863				-610.469	-610.433	-610.531	-610.551	1.19903		42_Uracil-Cyclopentane_1.25		-412.63			-414.277	-414.227	-414.291	-414.305	1.20556		-195.233
42_Uracil-Cyclopentane_1.50	0.0514854			1.133		0.861706	1.049	1.0311	0.187292	0.169389	0.224636	0.219534	0.213756		-0.0839999	-0.101902	-0.0466556	-0.0517577	-0.0575356				1.17215		42_Uracil-Cyclopentane_1.50	-607.863				-610.467	-610.432	-610.529	-610.549	1.19939		42_Uracil-Cyclopentane_1.50		-412.63			-414.277	-414.227	-414.291	-414.305	1.20556		-195.233
42_Uracil-Cyclopentane_2.00	0.0290471			0.290237		0.221444	0.270498	0.239609	0.0490536	0.0181647	0.0588463	0.0575075	0.0559849		-0.0197393	-0.0506282	-0.00994667	-0.0112854	-0.012808				1.17234		42_Uracil-Cyclopentane_2.00	-607.863				-610.465	-610.431	-610.528	-610.547	1.19963		42_Uracil-Cyclopentane_2.00		-412.63			-414.277	-414.227	-414.291	-414.305	1.20556		-195.233
43_Uracil-Neopentane_0.90	-5.6304			3.58227		1.50913	2.8572	2.96633	1.34807	1.45721	1.61329	1.57607	1.53855		-0.725072	-0.615936	-0.459849	-0.497073	-0.53459				1.16913		43_Uracil-Neopentane_0.90	-609.029				-611.679	-611.648	-611.747	-611.767	1.19674		43_Uracil-Neopentane_0.90		-412.63			-414.277	-414.227	-414.291	-414.305	1.20557		-196.407
43_Uracil-Neopentane_0.95	-3.12467			4.14216		2.51736	3.6146	3.69017	1.09725	1.17281	1.3134	1.28303	1.25229		-0.527557	-0.451994	-0.311402	-0.341772	-0.372516				1.16932		43_Uracil-Neopentane_0.95	-609.033				-611.68	-611.65	-611.748	-611.768	1.197		43_Uracil-Neopentane_0.95		-412.63			-414.277	-414.227	-414.291	-414.305	1.20557		-196.407
43_Uracil-Neopentane_1.00	-1.65326			4.11999		2.83341	3.73035	3.7797	0.896939	0.946291	1.07383	1.04895	1.02368		-0.389639	-0.340287	-0.212751	-0.237626	-0.262901				1.16948		43_Uracil-Neopentane_1.00	-609.035				-611.68	-611.65	-611.749	-611.768	1.19721		43_Uracil-Neopentane_1.00		-412.63			-414.277	-414.227	-414.291	-414.305	1.20557		-196.407
43_Uracil-Neopentane_1.05	-0.795122			3.82053		2.7925	3.52834	3.55714	0.735842	0.76464	0.881093	0.860655	0.839816		-0.292187	-0.263389	-0.146936	-0.167374	-0.188213				1.16962		43_Uracil-Neopentane_1.05	-609.036				-611.679	-611.65	-611.748	-611.768	1.1974		43_Uracil-Neopentane_1.05		-412.63			-414.277	-414.227	-414.291	-414.305	1.20557		-196.407
43_Uracil-Neopentane_1.10	-0.303716			3.41088		2.58206	3.18811	3.20077	0.606054	0.61871	0.72578	0.708925	0.691689		-0.222769	-0.210113	-0.103043	-0.119898	-0.137134				1.16974		43_Uracil-Neopentane_1.10	-609.037				-611.679	-611.65	-611.748	-611.767	1.19755		43_Uracil-Neopentane_1.10		-412.63			-414.277	-414.227	-414.291	-414.305	1.20557		-196.407
43_Uracil-Neopentane_1.25	0.186484			2.19902		1.74276	2.08968	2.07142	0.34692	0.328661	0.415569	0.4059	0.39594		-0.109342	-0.127601	-0.0406925	-0.0503618	-0.0603219				1.17001		43_Uracil-Neopentane_1.25	-609.038				-611.677	-611.649	-611.746	-611.765	1.19788		43_Uracil-Neopentane_1.25		-412.63			-414.277	-414.227	-414.291	-414.305	1.20557		-196.407
43_Uracil-Neopentane_1.50	0.17822			0.999492		0.804713	0.954882	0.91503	0.150169	0.110316	0.179928	0.175735	0.171388		-0.0446098	-0.0844624	-0.0148513	-0.0190435	-0.0233909				1.17025		43_Uracil-Neopentane_1.50	-609.038				-611.675	-611.647	-611.744	-611.763	1.19817		43_Uracil-Neopentane_1.50		-412.63			-414.277	-414.227	-414.291	-414.305	1.20557		-196.407
43_Uracil-Neopentane_2.00	0.0603797			0.261466		0.211335	0.251486	0.201687	0.0401513	-0.00964813	0.0481158	0.0469935	0.0458247		-0.00997951	-0.059779	-0.00201502	-0.00313732	-0.00430612				1.17041		43_Uracil-Neopentane_2.00	-609.038				-611.674	-611.646	-611.743	-611.762	1.19836		43_Uracil-Neopentane_2.00		-412.63			-414.277	-414.227	-414.291	-414.305	1.20557		-196.407
44_Ethene-Pentane_0.90	-3.76295			1.97345		0.856873	1.5946	1.68536	0.737722	0.828485	0.875648	0.849392	0.841963		-0.378852	-0.28809	-0.240927	-0.267183	-0.274612				1.15137		44_Ethene-Pentane_0.90	-274.467				-275.827	-275.861	-275.907	-275.915	1.18696		44_Ethene-Pentane_0.90		-78.0658			-78.4355	-78.4458	-78.459	-78.4615	1.18753		-196.407
44_Ethene-Pentane_0.95	-2.32231			2.20007		1.33057	1.9263	1.99874	0.595736	0.668175	0.707287	0.68602	0.679913		-0.273765	-0.201326	-0.162214	-0.183481	-0.189588				1.15155		44_Ethene-Pentane_0.95	-274.469				-275.828	-275.862	-275.907	-275.916	1.18725		44_Ethene-Pentane_0.95		-78.0658			-78.4355	-78.4458	-78.459	-78.4615	1.18753		-196.407
44_Ethene-Pentane_1.00	-1.43496			2.15982		1.47347	1.95665	2.01484	0.483179	0.541369	0.573769	0.556487	0.551452		-0.203171	-0.144981	-0.112581	-0.129864	-0.134898				1.15172		44_Ethene-Pentane_1.00	-274.471				-275.828	-275.862	-275.907	-275.916	1.18749		44_Ethene-Pentane_1.00		-78.0658			-78.4355	-78.4458	-78.459	-78.4615	1.18753		-196.407
44_Ethene-Pentane_1.05	-0.884518			1.994		1.44559	1.83906	1.88605	0.393474	0.440463	0.467324	0.453227	0.449072		-0.15494	-0.107951	-0.0810903	-0.0951874	-0.0993425				1.15186		44_Ethene-Pentane_1.05	-274.471				-275.827	-275.862	-275.907	-275.916	1.18769		44_Ethene-Pentane_1.05		-78.0658			-78.4355	-78.4458	-78.459	-78.4615	1.18753		-196.407
44_Ethene-Pentane_1.10	-0.542793			1.77949		1.33615	1.65813	1.69626	0.321973	0.360111	0.382455	0.370906	0.367467		-0.121367	-0.083229	-0.0608852	-0.072434	-0.0758726				1.15198		44_Ethene-Pentane_1.10	-274.472				-275.827	-275.862	-275.907	-275.915	1.18785		44_Ethene-Pentane_1.10		-78.0658			-78.4355	-78.4458	-78.459	-78.4615	1.18753		-196.407
44_Ethene-Pentane_1.25	-0.115689			1.15556		0.907255	1.08962	1.11063	0.182365	0.203375	0.216681	0.210126	0.208133		-0.0659448	-0.0449352	-0.0316288	-0.0381834	-0.0401766				1.15223		44_Ethene-Pentane_1.25	-274.473				-275.826	-275.861	-275.906	-275.915	1.18817		44_Ethene-Pentane_1.25		-78.0658			-78.4355	-78.4458	-78.459	-78.4615	1.18753		-196.407
44_Ethene-Pentane_1.50	0.00236929			0.533153		0.423523	0.503811	0.512585	0.0802878	0.0890616	0.0954156	0.0925268	0.0916324		-0.029342	-0.0205682	-0.0142141	-0.017103	-0.0179974				1.15244		44_Ethene-Pentane_1.50	-274.473				-275.825	-275.86	-275.905	-275.914	1.18842		44_Ethene-Pentane_1.50		-78.0658			-78.4355	-78.4458	-78.459	-78.4615	1.18753		-196.407
44_Ethene-Pentane_2.00	0.00560995			0.134886		0.106206	0.126795	0.129298	0.0205896	0.0230917	0.0244728	0.023731	0.023499		-0.00809077	-0.00558867	-0.00420759	-0.00494941	-0.00518145				1.15257		44_Ethene-Pentane_2.00	-274.473				-275.824	-275.86	-275.905	-275.913	1.1886		44_Ethene-Pentane_2.00		-78.0658			-78.4355	-78.4458	-78.459	-78.4615	1.18753		-196.407
45_Ethyne-Pentane_0.90	-4.12867			1.81198		0.298152	0.994985	1.10529	0.696832	0.807142	0.825745	0.802639	0.795295		-0.816991	-0.706682	-0.688079	-0.711184	-0.718529				1.15184		45_Ethyne-Pentane_0.90	-273.251				-274.585	-274.606	-274.654	-274.662	1.185		45_Ethyne-Pentane_0.90		-76.8502			-77.1935	-77.1921	-77.2068	-77.2095	1.17825		-196.407
45_Ethyne-Pentane_0.95	-2.45104			2.15187		0.976245	1.52981	1.62062	0.553562	0.644379	0.656101	0.637697	0.63178		-0.622059	-0.531242	-0.51952	-0.537923	-0.543841				1.15199		45_Ethyne-Pentane_0.95	-273.253				-274.585	-274.608	-274.655	-274.663	1.18523		45_Ethyne-Pentane_0.95		-76.8502			-77.1935	-77.1921	-77.2068	-77.2095	1.17825		-196.407
45_Ethyne-Pentane_1.00	-1.43357			2.15631		1.23514	1.67673	1.75245	0.441586	0.51731	0.523469	0.508756	0.503983		-0.479583	-0.40386	-0.397701	-0.412413	-0.417187				1.15211		45_Ethyne-Pentane_1.00	-273.255				-274.585	-274.608	-274.655	-274.663	1.18543		45_Ethyne-Pentane_1.00		-76.8502			-77.1935	-77.1921	-77.2068	-77.2095	1.17825		-196.407
45_Ethyne-Pentane_1.05	-0.816452			2.00003		1.27244	1.62598	1.68991	0.353538	0.417471	0.419148	0.40735	0.403492		-0.37405	-0.310117	-0.30844	-0.320238	-0.324095				1.15221		45_Ethyne-Pentane_1.05	-273.256				-274.585	-274.608	-274.655	-274.663	1.18558		45_Ethyne-Pentane_1.05		-76.8502			-77.1935	-77.1921	-77.2068	-77.2095	1.17825		-196.407
45_Ethyne-Pentane_1.10	-0.444647			1.77876		1.19948	1.48367	1.53836	0.284187	0.338874	0.336962	0.327468	0.324342		-0.295087	-0.2404	-0.242312	-0.251806	-0.254932				1.1523		45_Ethyne-Pentane_1.10	-273.256				-274.585	-274.608	-274.654	-274.663	1.18571		45_Ethyne-Pentane_1.10		-76.8502			-77.1935	-77.1921	-77.2068	-77.2095	1.17825		-196.407
45_Ethyne-Pentane_1.25	-0.0156912			1.11835		0.813087	0.965098	1.00219	0.15201	0.189103	0.180276	0.175187	0.173489		-0.153256	-0.116163	-0.12499	-0.130079	-0.131777				1.15247		45_Ethyne-Pentane_1.25	-273.257				-274.584	-274.607	-274.654	-274.662	1.18594		45_Ethyne-Pentane_1.25		-76.8502			-77.1935	-77.1921	-77.2068	-77.2095	1.17825		-196.407
45_Ethyne-Pentane_1.50	0.0615374			0.485704		0.364796	0.426863	0.452103	0.0620675	0.0873072	0.0736191	0.071539	0.0708377		-0.0588406	-0.033601	-0.0472891	-0.0493691	-0.0500705				1.1526		45_Ethyne-Pentane_1.50	-273.257				-274.583	-274.607	-274.653	-274.661	1.18611		45_Ethyne-Pentane_1.50		-76.8502			-77.1935	-77.1921	-77.2068	-77.2095	1.17825		-196.407
45_Ethyne-Pentane_2.00	0.0272063			0.110349		0.0854509	0.0982038	0.117667	0.0127529	0.0322165	0.0151278	0.0147	0.0145548		-0.0121452	0.00731842	-0.00977028	-0.0101981	-0.0103433				1.15268		45_Ethyne-Pentane_2.00	-273.257				-274.582	-274.606	-274.652	-274.661	1.18623		45_Ethyne-Pentane_2.00		-76.8502			-77.1935	-77.1921	-77.2068	-77.2095	1.17825		-196.407
46_Peptide-Pentane_0.90	-5.67416			4.26308		2.31402	3.68733	3.84519	1.37331	1.53117	1.63942	1.59547	1.56736		-0.575751	-0.417893	-0.309643	-0.353591	-0.381702				1.16177		46_Peptide-Pentane_0.90	-443.504				-445.56	-445.574	-445.644	-445.657	1.19377		46_Peptide-Pentane_0.90		-247.106			-248.164	-248.156	-248.193	-248.2	1.20256		-196.407
46_Peptide-Pentane_0.95	-3.59918			4.59712		3.00455	4.16192	4.29109	1.15737	1.28654	1.38198	1.34485	1.32091		-0.435202	-0.306029	-0.210588	-0.24772	-0.271666				1.16199		46_Peptide-Pentane_0.95	-443.507				-445.56	-445.575	-445.645	-445.658	1.19407		46_Peptide-Pentane_0.95		-247.106			-248.164	-248.156	-248.193	-248.2	1.20256		-196.407
46_Peptide-Pentane_1.00	-2.23024			4.54779		3.23914	4.21468	4.32001	0.975535	1.08087	1.16512	1.13375	1.11338		-0.33312	-0.22779	-0.143538	-0.174907	-0.195276				1.16218		46_Peptide-Pentane_1.00	-443.51				-445.56	-445.575	-445.645	-445.658	1.19434		46_Peptide-Pentane_1.00		-247.106			-248.164	-248.156	-248.193	-248.2	1.20256		-196.407
46_Peptide-Pentane_1.05	-1.33228			4.28605		3.20504	4.02752	4.113	0.822487	0.907964	0.982514	0.956018	0.938704		-0.258523	-0.173046	-0.0984962	-0.124992	-0.142306				1.16235		46_Peptide-Pentane_1.05	-443.511				-445.56	-445.575	-445.644	-445.658	1.19456		46_Peptide-Pentane_1.05		-247.106			-248.164	-248.156	-248.193	-248.2	1.20256		-196.407
46_Peptide-Pentane_1.10	-0.750773			3.92051		3.02239	3.71672	3.78574	0.694328	0.763351	0.829556	0.807156	0.792436		-0.203794	-0.134772	-0.068566	-0.090966	-0.105686				1.1625		46_Peptide-Pentane_1.10	-443.512				-445.559	-445.575	-445.644	-445.657	1.19476		46_Peptide-Pentane_1.10		-247.106			-248.164	-248.156	-248.193	-248.2	1.20256		-196.407
46_Peptide-Pentane_1.25	-0.00285776			2.73767		2.20487	2.62774	2.66258	0.422867	0.45771	0.50541	0.491727	0.482619		-0.109933	-0.0750899	-0.0273901	-0.0410729	-0.0501815				1.16284		46_Peptide-Pentane_1.25	-443.513				-445.557	-445.574	-445.642	-445.655	1.1952		46_Peptide-Pentane_1.25		-247.106			-248.164	-248.156	-248.193	-248.2	1.20256		-196.407
46_Peptide-Pentane_1.50	0.150379			1.24634		1.02283	1.20087	1.20601	0.17804	0.18318	0.212868	0.207094	0.203197		-0.0454699	-0.0403296	-0.0106415	-0.0164156	-0.0203129				1.16319		46_Peptide-Pentane_1.50	-443.513				-445.555	-445.572	-445.64	-445.653	1.19562		46_Peptide-Pentane_1.50		-247.106			-248.164	-248.156	-248.193	-248.2	1.20256		-196.407
46_Peptide-Pentane_2.00	0.0571569			0.310858		0.255148	0.299877	0.29125	0.0447291	0.0361021	0.0534921	0.0520392	0.0510494		-0.010981	-0.019608	-0.00221807	-0.00367092	-0.00466078				1.16343		46_Peptide-Pentane_2.00	-443.513				-445.553	-445.571	-445.638	-445.652	1.19591		46_Peptide-Pentane_2.00		-247.106			-248.164	-248.156	-248.193	-248.2	1.20256		-196.407
47_Benzene-Benzene_TS_0.90	-5.71725			3.34745		0.472567	1.64495	1.74918	1.17239	1.27661	1.38848	1.35742	1.33804		-1.7025	-1.59827	-1.4864	-1.51746	-1.53684				1.15783		47_Benzene-Benzene_TS_0.90	-461.56				-463.671	-463.64	-463.734	-463.751	1.18432		47_Benzene-Benzene_TS_0.90		-230.784			-231.833	-231.819	-231.865	-231.874	1.18626		-230.784
47_Benzene-Benzene_TS_0.95	-3.18322			3.91633		1.65864	2.60508	2.68579	0.94644	1.02715	1.12118	1.09601	1.08017		-1.31126	-1.23054	-1.13651	-1.16169	-1.17752				1.15803		47_Benzene-Benzene_TS_0.95	-461.564				-463.671	-463.642	-463.735	-463.752	1.18463		47_Benzene-Benzene_TS_0.95		-230.784			-231.833	-231.819	-231.865	-231.874	1.18626		-230.784
47_Benzene-Benzene_TS_1.00	-1.66997			3.93068		2.14183	2.90945	2.97224	0.767621	0.830409	0.909546	0.889059	0.876086		-1.02123	-0.958447	-0.87931	-0.899797	-0.91277				1.1582		47_Benzene-Benzene_TS_1.00	-461.566				-463.671	-463.642	-463.736	-463.753	1.18489		47_Benzene-Benzene_TS_1.00		-230.784			-231.833	-231.819	-231.865	-231.874	1.18626		-230.784
47_Benzene-Benzene_TS_1.05	-0.772961			3.67356		2.24463	2.86938	2.91845	0.624754	0.673817	0.7404	0.723684	0.713032		-0.804173	-0.75511	-0.688527	-0.705243	-0.715895				1.15835		47_Benzene-Benzene_TS_1.05	-461.567				-463.671	-463.643	-463.736	-463.753	1.18511		47_Benzene-Benzene_TS_1.05		-230.784			-231.833	-231.819	-231.865	-231.874	1.18626		-230.784
47_Benzene-Benzene_TS_1.10	-0.251057			3.3026		2.15155	2.6619	2.70039	0.510346	0.548837	0.604908	0.591226	0.582458		-0.640704	-0.602213	-0.546143	-0.559825	-0.568592				1.15848		47_Benzene-Benzene_TS_1.10	-461.568				-463.67	-463.642	-463.735	-463.752	1.18529		47_Benzene-Benzene_TS_1.10		-230.784			-231.833	-231.819	-231.865	-231.874	1.18626		-230.784
47_Benzene-Benzene_TS_1.25	0.28344			2.17305		1.54209	1.82785	1.84651	0.285759	0.304419	0.338815	0.331126	0.326137		-0.345203	-0.326543	-0.292147	-0.299836	-0.304825				1.15876		47_Benzene-Benzene_TS_1.25	-461.569				-463.669	-463.641	-463.734	-463.751	1.18567		47_Benzene-Benzene_TS_1.25		-230.784			-231.833	-231.819	-231.865	-231.874	1.18626		-230.784
47_Benzene-Benzene_TS_1.50	0.271386			1.02799		0.762067	0.884876	0.889756	0.122809	0.127689	0.145646	0.142334	0.140162		-0.143114	-0.138234	-0.120277	-0.12359	-0.125761				1.15898		47_Benzene-Benzene_TS_1.50	-461.569				-463.667	-463.64	-463.732	-463.749	1.18595		47_Benzene-Benzene_TS_1.50		-230.784			-231.833	-231.819	-231.865	-231.874	1.18626		-230.784
47_Benzene-Benzene_TS_2.00	0.110229			0.293188		0.224668	0.258719	0.258329	0.0340508	0.0336605	0.0403892	0.039469	0.0388622		-0.034469	-0.0348592	-0.0281306	-0.0290508	-0.0296576				1.15912		47_Benzene-Benzene_TS_2.00	-461.569				-463.666	-463.639	-463.731	-463.748	1.18614		47_Benzene-Benzene_TS_2.00		-230.784			-231.833	-231.819	-231.865	-231.874	1.18626		-230.784
48_Pyridine-Pyridine_TS_0.90	-4.46179			4.04008		1.3718	2.47249	2.58415	1.10069	1.21235	1.30642	1.27887	1.25622		-1.56759	-1.45593	-1.36185	-1.38941	-1.41206				1.16188		48_Pyridine-Pyridine_TS_0.90	-493.557				-495.746	-495.7	-495.798	-495.816	1.18691		48_Pyridine-Pyridine_TS_0.90		-246.782			-247.87	-247.849	-247.897	-247.906	1.18848		-246.782
48_Pyridine-Pyridine_TS_0.95	-2.2807			4.51702		2.38128	3.28451	3.37288	0.903233	0.991602	1.07226	1.04957	1.03086		-1.23251	-1.14414	-1.06348	-1.08617	-1.10488				1.16202		48_Pyridine-Pyridine_TS_0.95	-493.56				-495.747	-495.702	-495.799	-495.817	1.18714		48_Pyridine-Pyridine_TS_0.95		-246.782			-247.87	-247.849	-247.897	-247.906	1.18848		-246.782
48_Pyridine-Pyridine_TS_1.00	-0.952355			4.51041		2.78814	3.53118	3.6012	0.743039	0.813055	0.88223	0.863523	0.84803		-0.979231	-0.909215	-0.84004	-0.858747	-0.87424				1.16215		48_Pyridine-Pyridine_TS_1.00	-493.563				-495.747	-495.702	-495.799	-495.818	1.18733		48_Pyridine-Pyridine_TS_1.00		-246.782			-247.87	-247.849	-247.897	-247.906	1.18848		-246.782
48_Pyridine-Pyridine_TS_1.05	-0.158126			4.25171		2.85319	3.46542	3.52093	0.612238	0.667743	0.727028	0.71158	0.698748		-0.786284	-0.730779	-0.671494	-0.686942	-0.699774				1.16226		48_Pyridine-Pyridine_TS_1.05	-493.564				-495.747	-495.702	-495.799	-495.818	1.18749		48_Pyridine-Pyridine_TS_1.05		-246.782			-247.87	-247.849	-247.897	-247.906	1.18848		-246.782
48_Pyridine-Pyridine_TS_1.10	0.300298			3.87825		2.73428	3.23979	3.28382	0.505514	0.549547	0.600365	0.58759	0.576944		-0.638455	-0.594422	-0.543605	-0.55638	-0.567026				1.16236		48_Pyridine-Pyridine_TS_1.10	-493.565				-495.746	-495.702	-495.799	-495.817	1.18763		48_Pyridine-Pyridine_TS_1.10		-246.782			-247.87	-247.849	-247.897	-247.906	1.18848		-246.782
48_Pyridine-Pyridine_TS_1.25	0.718818			2.69154		2.03952	2.32921	2.35108	0.289683	0.311556	0.344124	0.336779	0.330615		-0.362334	-0.34046	-0.307893	-0.315237	-0.321402				1.16258		48_Pyridine-Pyridine_TS_1.25	-493.565				-495.744	-495.701	-495.798	-495.816	1.18793		48_Pyridine-Pyridine_TS_1.25		-246.782			-247.87	-247.849	-247.897	-247.906	1.18848		-246.782
48_Pyridine-Pyridine_TS_1.50	0.566874			1.38133		1.09339	1.21849	1.22483	0.125104	0.13144	0.148647	0.145467	0.142781		-0.162838	-0.156502	-0.139294	-0.142474	-0.14516				1.16277		48_Pyridine-Pyridine_TS_1.50	-493.565				-495.742	-495.7	-495.796	-495.814	1.18819		48_Pyridine-Pyridine_TS_1.50		-246.782			-247.87	-247.849	-247.897	-247.906	1.18848		-246.782
48_Pyridine-Pyridine_TS_2.00	0.247425			0.443813		0.365161	0.396948	0.397012	0.0317872	0.0318513	0.0377752	0.0369657	0.0362788		-0.0468644	-0.0468004	-0.0408764	-0.0416859	-0.0423729				1.16291		48_Pyridine-Pyridine_TS_2.00	-493.564				-495.741	-495.698	-495.794	-495.813	1.18838		48_Pyridine-Pyridine_TS_2.00		-246.782			-247.87	-247.849	-247.897	-247.906	1.18848		-246.782
49_Benzene-Pyridine_TS_0.90	-5.14186			3.72238		0.939975	2.08124	2.18724	1.14126	1.24726	1.35308	1.32368	1.30252		-1.64114	-1.53514	-1.42932	-1.45872	-1.47988				1.15984		49_Benzene-Pyridine_TS_0.90	-477.558				-479.709	-479.67	-479.766	-479.783	1.1856		49_Benzene-Pyridine_TS_0.90		-230.784			-231.833	-231.819	-231.865	-231.874	1.18625		-246.782
49_Benzene-Pyridine_TS_0.95	-2.60313			4.32607		2.14292	3.06191	3.1438	0.91899	1.00088	1.08981	1.06605	1.04884		-1.26417	-1.18227	-1.09334	-1.11711	-1.13431				1.16002		49_Benzene-Pyridine_TS_0.95	-477.562				-479.709	-479.672	-479.767	-479.785	1.18588		49_Benzene-Pyridine_TS_0.95		-230.784			-231.833	-231.819	-231.865	-231.874	1.18625		-246.782
49_Benzene-Pyridine_TS_1.00	-1.10491			4.34723		2.6195	3.36266	3.42611	0.743155	0.806609	0.881472	0.862194	0.848163		-0.984572	-0.921118	-0.846255	-0.865533	-0.879564				1.16018		49_Benzene-Pyridine_TS_1.00	-477.565				-479.71	-479.673	-479.768	-479.785	1.18612		49_Benzene-Pyridine_TS_1.00		-230.784			-231.833	-231.819	-231.865	-231.874	1.18625		-246.782
49_Benzene-Pyridine_TS_1.05	-0.234653			4.08057		2.70234	3.30514	3.35447	0.602799	0.652134	0.715114	0.69944	0.687974		-0.775429	-0.726094	-0.663114	-0.678788	-0.690253				1.16032		49_Benzene-Pyridine_TS_1.05	-477.566				-479.709	-479.673	-479.768	-479.785	1.18632		49_Benzene-Pyridine_TS_1.05		-230.784			-231.833	-231.819	-231.865	-231.874	1.18625		-246.782
49_Benzene-Pyridine_TS_1.10	0.254789			3.69132		2.5827	3.07321	3.1117	0.490505	0.528992	0.58198	0.569201	0.559813		-0.618113	-0.579626	-0.526638	-0.539417	-0.548805				1.16044		49_Benzene-Pyridine_TS_1.10	-477.567				-479.708	-479.673	-479.767	-479.785	1.18649		49_Benzene-Pyridine_TS_1.10		-230.784			-231.833	-231.819	-231.865	-231.874	1.18625		-246.782
49_Benzene-Pyridine_TS_1.25	0.687487			2.49077		1.88546	2.156	2.1743	0.270543	0.288839	0.321092	0.314022	0.308771		-0.334769	-0.316473	-0.28422	-0.29129	-0.296541				1.16071		49_Benzene-Pyridine_TS_1.25	-477.567				-479.707	-479.671	-479.766	-479.783	1.18684		49_Benzene-Pyridine_TS_1.25		-230.784			-231.833	-231.819	-231.865	-231.874	1.18625		-246.782
49_Benzene-Pyridine_TS_1.50	0.542933			1.24491		0.99064	1.10282	1.10734	0.112184	0.116699	0.133174	0.130236	0.128035		-0.142085	-0.13757	-0.121094	-0.124033	-0.126234				1.16092		49_Benzene-Pyridine_TS_1.50	-477.567				-479.705	-479.67	-479.764	-479.782	1.18711		49_Benzene-Pyridine_TS_1.50		-230.784			-231.833	-231.819	-231.865	-231.874	1.18625		-246.782
49_Benzene-Pyridine_TS_2.00	0.244076			0.403196		0.337544	0.366107	0.365398	0.0285629	0.0278532	0.0339123	0.0331629	0.0325988		-0.0370888	-0.0377984	-0.0317393	-0.0324887	-0.0330528				1.16105		49_Benzene-Pyridine_TS_2.00	-477.567				-479.703	-479.669	-479.763	-479.781	1.18729		49_Benzene-Pyridine_TS_2.00		-230.784			-231.833	-231.819	-231.865	-231.874	1.18625		-246.782
50_Benzene-Ethyne_CH-pi_0.90	-2.70752			2.99272		1.13564	1.81241	1.88585	0.676773	0.750209	0.8006	0.782688	0.772401		-1.18031	-1.10688	-1.05649	-1.0744	-1.08468				1.1565		50_Benzene-Ethyne_CH-pi_0.90	-307.63				-309.031	-309.013	-309.075	-309.086	1.18297		50_Benzene-Ethyne_CH-pi_0.90		-230.784			-231.833	-231.819	-231.865	-231.874	1.18625		-76.8501
50_Benzene-Ethyne_CH-pi_0.95	-0.852791			3.5244		2.09075	2.62578	2.68114	0.535032	0.59039	0.633034	0.618829	0.610632		-0.898618	-0.84326	-0.800616	-0.814821	-0.823018				1.15662		50_Benzene-Ethyne_CH-pi_0.95	-307.633				-309.032	-309.015	-309.076	-309.088	1.18317		50_Benzene-Ethyne_CH-pi_0.95		-230.784			-231.833	-231.819	-231.865	-231.874	1.18625		-76.8501
50_Benzene-Ethyne_CH-pi_1.00	0.178205			3.55947		2.4436	2.86904	2.91066	0.425436	0.467055	0.503433	0.492106	0.48555		-0.690432	-0.648812	-0.612435	-0.623762	-0.630318				1.15671		50_Benzene-Ethyne_CH-pi_1.00	-307.635				-309.032	-309.015	-309.077	-309.088	1.18333		50_Benzene-Ethyne_CH-pi_1.00		-230.784			-231.833	-231.819	-231.865	-231.874	1.18625		-76.8501
50_Benzene-Ethyne_CH-pi_1.05	0.72302			3.34462		2.46912	2.80856	2.83976	0.339436	0.370645	0.401714	0.39266	0.387399		-0.536063	-0.504855	-0.473785	-0.48284	-0.488101				1.1568		50_Benzene-Ethyne_CH-pi_1.05	-307.636				-309.031	-309.015	-309.077	-309.088	1.18347		50_Benzene-Ethyne_CH-pi_1.05		-230.784			-231.833	-231.819	-231.865	-231.874	1.18625		-76.8501
50_Benzene-Ethyne_CH-pi_1.10	0.982843			3.02327		2.33025	2.60173	2.62514	0.271483	0.294896	0.321326	0.314073	0.309843		-0.421543	-0.39813	-0.3717	-0.378953	-0.383182				1.15688		50_Benzene-Ethyne_CH-pi_1.10	-307.636				-309.031	-309.015	-309.076	-309.088	1.1836		50_Benzene-Ethyne_CH-pi_1.10		-230.784			-231.833	-231.819	-231.865	-231.874	1.18625		-76.8501
50_Benzene-Ethyne_CH-pi_1.25	1.03995			2.03692		1.67441	1.81603	1.82607	0.141619	0.151658	0.167659	0.163865	0.16163		-0.220886	-0.210847	-0.194846	-0.19864	-0.200875				1.15708		50_Benzene-Ethyne_CH-pi_1.25	-307.636				-309.029	-309.014	-309.075	-309.086	1.18387		50_Benzene-Ethyne_CH-pi_1.25		-230.784			-231.833	-231.819	-231.865	-231.874	1.18625		-76.8501
50_Benzene-Ethyne_CH-pi_1.50	0.669065			1.01491		0.871553	0.925638	0.927116	0.054085	0.055563	0.0640402	0.0625882	0.0617272		-0.0892752	-0.0877972	-0.07932	-0.080772	-0.081633				1.15722		50_Benzene-Ethyne_CH-pi_1.50	-307.636				-309.028	-309.013	-309.074	-309.085	1.18407		50_Benzene-Ethyne_CH-pi_1.50		-230.784			-231.833	-231.819	-231.865	-231.874	1.18625		-76.8501
50_Benzene-Ethyne_CH-pi_2.00	0.251838			0.310498		0.278239	0.289478	0.28773	0.0112398	0.00949182	0.01331	0.0130078	0.0128279		-0.0210202	-0.0227682	-0.01895	-0.0192522	-0.019432				1.1573		50_Benzene-Ethyne_CH-pi_2.00	-307.635				-309.027	-309.012	-309.073	-309.084	1.18419		50_Benzene-Ethyne_CH-pi_2.00		-230.784			-231.833	-231.819	-231.865	-231.874	1.18625		-76.8501
51_Ethyne-Ethyne_TS_0.90	-0.437885			1.50439		0.955689	1.22187	1.25886	0.266183	0.303172	0.313482	0.306497	0.303795		-0.282514	-0.245525	-0.235215	-0.2422	-0.244902				1.15145		51_Ethyne-Ethyne_TS_0.90	-153.7				-154.389	-154.386	-154.416	-154.421	1.17769		51_Ethyne-Ethyne_TS_0.90		-76.8502			-77.1935	-77.1921	-77.2068	-77.2095	1.17826		-76.8502
51_Ethyne-Ethyne_TS_0.95	0.212275			1.70157		1.27438	1.48461	1.51428	0.210231	0.239901	0.247616	0.242089	0.239936		-0.216959	-0.187289	-0.179574	-0.185101	-0.187254				1.15154		51_Ethyne-Ethyne_TS_0.95	-153.701				-154.39	-154.386	-154.416	-154.421	1.17783		51_Ethyne-Ethyne_TS_0.95		-76.8502			-77.1935	-77.1921	-77.2068	-77.2095	1.17826		-76.8502
51_Ethyne-Ethyne_TS_1.00	0.561342			1.70638		1.37213	1.53858	1.56238	0.166449	0.190248	0.196066	0.191686	0.189969		-0.167801	-0.144002	-0.138184	-0.142564	-0.144282				1.15162		51_Ethyne-Ethyne_TS_1.00	-153.701				-154.39	-154.386	-154.416	-154.421	1.17793		51_Ethyne-Ethyne_TS_1.00		-76.8502			-77.1935	-77.1921	-77.2068	-77.2095	1.17826		-76.8502
51_Ethyne-Ethyne_TS_1.05	0.726918			1.61036		1.34755	1.48009	1.49915	0.132539	0.151597	0.156132	0.152641	0.151267		-0.13027	-0.111213	-0.106678	-0.110168	-0.111543				1.15167		51_Ethyne-Ethyne_TS_1.05	-153.702				-154.39	-154.386	-154.416	-154.421	1.178		51_Ethyne-Ethyne_TS_1.05		-76.8502			-77.1935	-77.1921	-77.2068	-77.2095	1.17826		-76.8502
51_Ethyne-Ethyne_TS_1.10	0.783256			1.46807		1.26017	1.36664	1.38188	0.106468	0.121704	0.125424	0.122619	0.121511		-0.101435	-0.0861984	-0.0824789	-0.085284	-0.0863913				1.1517		51_Ethyne-Ethyne_TS_1.10	-153.702				-154.389	-154.386	-154.416	-154.421	1.17805		51_Ethyne-Ethyne_TS_1.10		-76.8502			-77.1935	-77.1921	-77.2068	-77.2095	1.17826		-76.8502
51_Ethyne-Ethyne_TS_1.25	0.682192			1.01134		0.903514	0.961536	0.969355	0.058022	0.0658412	0.0683564	0.0668262	0.0662205		-0.0498058	-0.0419866	-0.0394714	-0.0410016	-0.0416073				1.15174		51_Ethyne-Ethyne_TS_1.25	-153.702				-154.389	-154.386	-154.415	-154.42	1.17811		51_Ethyne-Ethyne_TS_1.25		-76.8502			-77.1935	-77.1921	-77.2068	-77.2095	1.17826		-76.8502
51_Ethyne-Ethyne_TS_1.50	0.396802			0.501526		0.459669	0.481673	0.484287	0.0220043	0.0246176	0.025925	0.0253439	0.0251136		-0.0198525	-0.0172393	-0.0159318	-0.0165129	-0.0167433				1.15177		51_Ethyne-Ethyne_TS_1.50	-153.701				-154.388	-154.385	-154.414	-154.42	1.17818		51_Ethyne-Ethyne_TS_1.50		-76.8502			-77.1935	-77.1921	-77.2068	-77.2095	1.17826		-76.8502
51_Ethyne-Ethyne_TS_2.00	0.132826			0.14335		0.135394	0.138997	0.139175	0.00360255	0.00378037	0.00424461	0.00414942	0.0041116		-0.00435343	-0.00417562	-0.00371137	-0.00380656	-0.00384439				1.1518		51_Ethyne-Ethyne_TS_2.00	-153.701				-154.387	-154.384	-154.414	-154.419	1.17822		51_Ethyne-Ethyne_TS_2.00		-76.8502			-77.1935	-77.1921	-77.2068	-77.2095	1.17826		-76.8502
52_Benzene-AcOH_OH-pi_0.90	-1.89363			4.95423		3.0172	3.95442	4.16904	0.937222	1.15184	1.12267	1.09814	1.06965		-0.999809	-0.785188	-0.81436	-0.838888	-0.867379				1.1717		52_Benzene-AcOH_OH-pi_0.90	-458.69				-460.647	-460.613	-460.69	-460.705	1.19787		52_Benzene-AcOH_OH-pi_0.90		-230.784			-231.833	-231.819	-231.865	-231.874	1.18623		-227.908
52_Benzene-AcOH_OH-pi_0.95	-0.147989			5.36281		3.8063	4.58391	4.7747	0.777611	0.9684	0.931602	0.911205	0.887487		-0.778899	-0.58811	-0.624908	-0.645305	-0.669022				1.1718		52_Benzene-AcOH_OH-pi_0.95	-458.692				-460.648	-460.614	-460.691	-460.706	1.19803		52_Benzene-AcOH_OH-pi_0.95		-230.784			-231.833	-231.819	-231.865	-231.874	1.18623		-227.908
52_Benzene-AcOH_OH-pi_1.00	0.880978			5.33041		4.07289	4.71925	4.89055	0.646361	0.817665	0.774449	0.757465	0.737692		-0.611161	-0.439858	-0.483073	-0.500058	-0.51983				1.17189		52_Benzene-AcOH_OH-pi_1.00	-458.694				-460.648	-460.615	-460.691	-460.707	1.19817		52_Benzene-AcOH_OH-pi_1.00		-230.784			-231.833	-231.819	-231.865	-231.874	1.18623		-227.908
52_Benzene-AcOH_OH-pi_1.05	1.45293			5.05673		4.03559	4.57348	4.72894	0.537888	0.693341	0.644543	0.630389	0.613892		-0.483248	-0.327796	-0.376593	-0.390747	-0.407244				1.17197		52_Benzene-AcOH_OH-pi_1.05	-458.695				-460.647	-460.615	-460.691	-460.706	1.19828		52_Benzene-AcOH_OH-pi_1.05		-230.784			-231.833	-231.819	-231.865	-231.874	1.18623		-227.908
52_Benzene-AcOH_OH-pi_1.10	1.73469			4.66489		3.83093	4.27918	4.42184	0.448253	0.590911	0.537182	0.525371	0.511591		-0.385703	-0.243045	-0.296775	-0.308586	-0.322365				1.17204		52_Benzene-AcOH_OH-pi_1.10	-458.695				-460.647	-460.615	-460.691	-460.706	1.19839		52_Benzene-AcOH_OH-pi_1.10		-230.784			-231.833	-231.819	-231.865	-231.874	1.18623		-227.908
52_Benzene-AcOH_OH-pi_1.25	1.76189			3.37012		2.89989	3.16133	3.2785	0.261441	0.378608	0.313372	0.30647	0.298383		-0.208794	-0.0916274	-0.156864	-0.163766	-0.171853				1.17223		52_Benzene-AcOH_OH-pi_1.25	-458.695				-460.645	-460.613	-460.689	-460.704	1.19863		52_Benzene-AcOH_OH-pi_1.25		-230.784			-231.833	-231.819	-231.865	-231.874	1.18623		-227.908
52_Benzene-AcOH_OH-pi_1.50	1.18546			1.82611		1.62334	1.73569	1.83367	0.112347	0.210326	0.134687	0.131717	0.128222		-0.0904209	0.00755844	-0.0680805	-0.0710512	-0.0745463				1.17241		52_Benzene-AcOH_OH-pi_1.50	-458.695				-460.642	-460.611	-460.687	-460.702	1.19885		52_Benzene-AcOH_OH-pi_1.50		-230.784			-231.833	-231.819	-231.865	-231.874	1.18623		-227.908
52_Benzene-AcOH_OH-pi_2.00	0.460667			0.60242		0.549796	0.5776	0.666306	0.0278043	0.11651	0.0333377	0.0326014	0.0317331		-0.0248192	0.0638861	-0.0192858	-0.0200221	-0.0208904				1.17253		52_Benzene-AcOH_OH-pi_2.00	-458.693				-460.64	-460.609	-460.685	-460.7	1.19901		52_Benzene-AcOH_OH-pi_2.00		-230.784			-231.833	-231.819	-231.865	-231.874	1.18623		-227.908
53_Benzene-AcNH2_NH-pi_0.90	-1.20172			4.47505		3.00592	3.81261	3.97751	0.806686	0.971583	0.963278	0.94162	0.92067		-0.662439	-0.497542	-0.505847	-0.527505	-0.548455				1.16727		53_Benzene-AcNH2_NH-pi_0.90	-438.848				-440.773	-440.746	-440.823	-440.837	1.19412		53_Benzene-AcNH2_NH-pi_0.90		-230.784			-231.833	-231.819	-231.865	-231.874	1.18623		-208.066
53_Benzene-AcNH2_NH-pi_0.95	0.201773			4.81232		3.62554	4.29751	4.44258	0.671971	0.817041	0.802501	0.784425	0.76692		-0.514815	-0.369745	-0.384285	-0.40236	-0.419865				1.16735		53_Benzene-AcNH2_NH-pi_0.95	-438.85				-440.773	-440.747	-440.823	-440.838	1.19425		53_Benzene-AcNH2_NH-pi_0.95		-230.784			-231.833	-231.819	-231.865	-231.874	1.18623		-208.066
53_Benzene-AcNH2_NH-pi_1.00	1.04164			4.79925		3.83464	4.39583	4.52456	0.56119	0.689924	0.670262	0.655145	0.640486		-0.403426	-0.274692	-0.294354	-0.309471	-0.32413				1.16742		53_Benzene-AcNH2_NH-pi_1.00	-438.852				-440.773	-440.747	-440.823	-440.838	1.19436		53_Benzene-AcNH2_NH-pi_1.00		-230.784			-231.833	-231.819	-231.865	-231.874	1.18623		-208.066
53_Benzene-AcNH2_NH-pi_1.05	1.51165			4.58418		3.79544	4.26519	4.38053	0.469749	0.585087	0.561091	0.548422	0.536124		-0.318994	-0.203657	-0.227652	-0.240321	-0.252619				1.16748		53_Benzene-AcNH2_NH-pi_1.05	-438.853				-440.773	-440.747	-440.823	-440.838	1.19445		53_Benzene-AcNH2_NH-pi_1.05		-230.784			-231.833	-231.819	-231.865	-231.874	1.18623		-208.066
53_Benzene-AcNH2_NH-pi_1.10	1.74056			4.26267		3.61347	4.00775	4.1122	0.394285	0.498729	0.470984	0.460339	0.449997		-0.254917	-0.150472	-0.178218	-0.188863	-0.199205				1.16753		53_Benzene-AcNH2_NH-pi_1.10	-438.853				-440.772	-440.747	-440.823	-440.838	1.19453		53_Benzene-AcNH2_NH-pi_1.10		-230.784			-231.833	-231.819	-231.865	-231.874	1.18623		-208.066
53_Benzene-AcNH2_NH-pi_1.25	1.72452			3.15267		2.77649	3.01371	3.09628	0.237218	0.319783	0.283407	0.27699	0.270737		-0.138958	-0.0563926	-0.0927685	-0.0991856	-0.105439				1.16766		53_Benzene-AcNH2_NH-pi_1.25	-438.853				-440.771	-440.746	-440.821	-440.836	1.19471		53_Benzene-AcNH2_NH-pi_1.25		-230.784			-231.833	-231.819	-231.865	-231.874	1.18623		-208.066
53_Benzene-AcNH2_NH-pi_1.50	1.13961			1.74365		1.57348	1.68334	1.74894	0.109854	0.175459	0.131262	0.128286	0.125377		-0.0603126	0.00529236	-0.0389045	-0.0418812	-0.0447902				1.16778		53_Benzene-AcNH2_NH-pi_1.50	-438.852				-440.768	-440.744	-440.819	-440.834	1.19488		53_Benzene-AcNH2_NH-pi_1.50		-230.784			-231.833	-231.819	-231.865	-231.874	1.18623		-208.066
53_Benzene-AcNH2_NH-pi_2.00	0.381766			0.517563		0.473355	0.501574	0.558034	0.0282195	0.0846793	0.0337229	0.0329573	0.0322069		-0.0159884	0.0404714	-0.010485	-0.0112506	-0.012001				1.16789		53_Benzene-AcNH2_NH-pi_2.00	-438.851				-440.766	-440.742	-440.817	-440.832	1.19502		53_Benzene-AcNH2_NH-pi_2.00		-230.784			-231.833	-231.819	-231.865	-231.874	1.18623		-208.066
54_Benzene-Water_OH-pi_0.90	-0.896515			3.41707		2.25818	2.82545	3.01857	0.567265	0.760388	0.677243	0.662299	0.64742		-0.591624	-0.398502	-0.481647	-0.496591	-0.51147				1.16753		54_Benzene-Water_OH-pi_0.90	-306.844				-308.195	-308.175	-308.229	-308.239	1.19387		54_Benzene-Water_OH-pi_0.90		-230.784			-231.833	-231.819	-231.865	-231.874	1.18624		-76.0613
54_Benzene-Water_OH-pi_0.95	0.32484			3.70195		2.78989	3.24644	3.42245	0.456555	0.632564	0.545128	0.533078	0.521066		-0.455507	-0.279499	-0.366934	-0.378984	-0.390996				1.16761		54_Benzene-Water_OH-pi_0.95	-306.846				-308.196	-308.176	-308.229	-308.24	1.194		54_Benzene-Water_OH-pi_0.95		-230.784			-231.833	-231.819	-231.865	-231.874	1.18624		-76.0613
54_Benzene-Water_OH-pi_1.00	1.01356			3.66443		2.94286	3.31034	3.47291	0.367485	0.530051	0.43882	0.429105	0.419411		-0.354085	-0.191519	-0.28275	-0.292465	-0.302159				1.16768		54_Benzene-Water_OH-pi_1.00	-306.847				-308.196	-308.176	-308.229	-308.24	1.19412		54_Benzene-Water_OH-pi_1.00		-230.784			-231.833	-231.819	-231.865	-231.874	1.18624		-76.0613
54_Benzene-Water_OH-pi_1.05	1.37229			3.45784		2.88407	3.17966	3.33171	0.295584	0.447641	0.352992	0.345168	0.33735		-0.278183	-0.126126	-0.220775	-0.228599	-0.236417				1.16775		54_Benzene-Water_OH-pi_1.05	-306.848				-308.195	-308.176	-308.229	-308.24	1.19422		54_Benzene-Water_OH-pi_1.05		-230.784			-231.833	-231.819	-231.865	-231.874	1.18624		-76.0613
54_Benzene-Water_OH-pi_1.10	1.52837			3.17298		2.71407	2.95167	3.09552	0.2376	0.381455	0.283769	0.277474	0.271173		-0.221316	-0.0774615	-0.175147	-0.181442	-0.187743				1.16782		54_Benzene-Water_OH-pi_1.10	-306.848				-308.195	-308.176	-308.229	-308.239	1.19431		54_Benzene-Water_OH-pi_1.10		-230.784			-231.833	-231.819	-231.865	-231.874	1.18624		-76.0613
54_Benzene-Water_OH-pi_1.25	1.45633			2.27127		2.028	2.15082	2.2792	0.122816	0.251199	0.146706	0.143447	0.14017		-0.120452	0.00792994	-0.0965624	-0.0998217	-0.103098				1.16798		54_Benzene-Water_OH-pi_1.25	-306.848				-308.194	-308.175	-308.228	-308.238	1.19452		54_Benzene-Water_OH-pi_1.25		-230.784			-231.833	-231.819	-231.865	-231.874	1.18624		-76.0613
54_Benzene-Water_OH-pi_1.50	0.983836			1.25114		1.15652	1.19852	1.31623	0.0420028	0.159713	0.0501795	0.0490635	0.0479378		-0.0526136	0.0650965	-0.0444369	-0.0455529	-0.0466786				1.1681		54_Benzene-Water_OH-pi_1.50	-306.847				-308.192	-308.173	-308.226	-308.236	1.19467		54_Benzene-Water_OH-pi_1.50		-230.784			-231.833	-231.819	-231.865	-231.874	1.18624		-76.0613
[truncated: 97 more rows]
[truncated: 5 more columns]

## Sheet: HLC -F12b
everything here cc-pVDZ-F12
													1.1413
					1.15		1.15
	0.3333	0.6222			0.75		0.75
		0.883333
													RMSD relative to HLC(Tb)sc		0.111019	0.0443062	0.0233888	0	0.0148811
[truncated: 532 more rows]
[truncated: 5 more columns]

## Sheet: MP2-F12 
								MP2-F12	VQZ-F12																							SCS-MP2-F12/VQZ-F12
[truncated: 544 more rows]
[truncated: 40 more columns]

[truncated: 37 more sheets: CCSD(T)-F12c_VDZ-F12, CCSD(T)-F12b_VDZ-F12, B2PLYP, B2GP-PLYP, DSD-PBEP86, DSD-PBEPBE, DSD-PBEB95, DSD-APF, dRPA75, PBE0, TPSS0, B3P86, B3LYP, B3PW91, PW6B95, APF, wB97X-V, M06, M06-2X, TPSS …]
