# Supplementary material for: The S66x8 benchmark for noncovalent interactions revisited: explicitly correlated ab initio methods and density functional theory
Source: Royal Society of Chemistry journal article supplement (doi:10.1039/c6cp00688d), 2016-01-01
Supplement: c6cp00688d2.xlsx [file c6cp00688d2.xlsx]

## Sheet: Weizmann data
	Like in Hobza S66 paper, 5-point quartic interpolation on {0.90, 0.95, 1.00, 1.05, 1.10}
										MSD	-0.000744091
										MAD	0.00245997
										RMSD	0.00285192
										MAX	0.006618
										MIN	-0.006302									Simple quadratic interpolation
	System	0.9	0.95	1	1.05	1.1	1.25	1.5	2	System	DiffMinS66	AbsDIffMinS66	HobzaS66	Minimum	De(minimum)	Lowering	wrt Hobza x8	wrt S66		Minimum	diff.w.quart	Lowering	diff.w.quart
	1	4.65882	4.95377	4.95065	4.76839	4.48656	3.47347	2.11314	0.871683	1	-0.002821	0.002821	0.976085	0.973264	4.98126	0.0306056	0.0671402	-0.0297424		0.974129	-0.000865202	0.0239804	0.00662517
	2	5.29279	5.63046	5.63423	5.43386	5.11853	3.96658	2.39407	0.954668	2	-0.003064	0.003064	0.97775	0.974686	5.66503	0.0307988	0.070954	-0.0359742		0.975922	-0.00123622	0.0236682	0.00713061
	3	6.57684	6.93748	6.9286	6.68924	6.31548	4.93163	2.9817	1.14331	3	-0.00326	0.00326	0.97577	0.97251	6.9699	0.0413002	0.0574411	-0.0661008		0.973074	-0.000564036	0.0334202	0.00787993
	4	7.74844	8.14892	8.153	7.90748	7.51416	6.02344	3.84403	1.44228	4	-0.002436	0.002436	0.977112	0.974676	8.19028	0.0372873	0.078821	-0.0297167		0.975818	-0.00114151	0.0291929	0.00809439
	5	5.39588	5.78687	5.82437	5.64391	5.33682	4.17157	2.53824	1.01501	5	-0.004109	0.004109	0.98504	0.980931	5.84217	0.0177991	0.0809461	-0.00882989		0.983603	-0.00267233	0.0117198	0.00607927
	6	7.06731	7.54963	7.60314	7.38503	7.00455	5.51719	3.35163	1.2771	6	-0.002698	0.002698	0.98483	0.982132	7.62235	0.019214	0.0688787	-0.043649		0.984849	-0.00271709	0.0124698	0.00674418
	7	7.78382	8.27017	8.32956	8.11612	7.73713	6.2281	3.66818	1.10412	7	-0.003017	0.003017	0.986095	0.983078	8.34673	0.0171696	0.115006	0.00972762		0.985884	-0.00280635	0.0108724	0.00629718
	8	4.68431	5.03233	5.06346	4.90126	4.62922	3.61095	2.20797	0.909445	8	-0.004032	0.004032	0.98444	0.980408	5.08024	0.0167799	0.0696046	-0.00676214		0.98305	-0.00264192	0.0111087	0.0056712
	9	2.8623	3.07802	3.06325	2.91723	2.70387	1.98385	1.10419	0.39645	9	-0.004253	0.004253	0.973969	0.969716	3.09342	0.0301726	0.0307291	-0.0195754		0.969376	0.000339952	0.0246198	0.00555282
	10	3.72444	4.11268	4.16466	4.01591	3.75635	2.79299	1.30885	0.38974	10	-0.001962	0.001962	0.98636	0.984398	4.17545	0.0107844	0.0174156	-0.0475516		0.987948	-0.00355022	0.00583125	0.0049531
	11	5.00913	5.40909	5.45282	5.27745	4.97585	3.2298	1.41274	0.460212	11	-0.001163	0.001163	0.983231	0.982068	5.46853	0.0157139	0.0448652	-0.0114711		0.984978	-0.00291023	0.00988756	0.00582638
	12	6.83393	7.27212	7.29992	7.07008	6.68838	5.23424	3.15783	1.19853	12	-0.003521	0.003521	0.98188	0.978359	7.32739	0.0274684	0.0577106	-0.0746086		0.980395	-0.00203606	0.0198052	0.00766317
	13	5.81102	6.22383	6.27817	6.10949	5.81023	4.6463	2.96981	1.31492	13	-0.003098	0.003098	0.987124	0.984026	6.29066	0.0124944	0.102868	0.00866339		0.987183	-0.00315743	0.00732672	0.00516767
	14	6.93821	7.44608	7.53646	7.35958	7.0205	5.63893	3.56734	1.49832	14	-0.003177	0.003177	0.9916	0.988423	7.54406	0.00760763	0.0900904	-0.0169364		0.991909	-0.00348564	0.00349935	0.00410828
	15	8.20422	8.69565	8.76729	8.56864	8.20436	6.72825	4.45655	1.7925	15	-0.003587	0.003587	0.988784	0.985197	8.78011	0.0128256	0.153263	0.0591146		0.988253	-0.00305594	0.00745968	0.00536589
	16	4.80144	5.15	5.19092	5.04427	4.79049	3.82538	2.46807	1.13891	16	-0.003911	0.003911	0.986716	0.982805	5.20325	0.012326	0.0755644	0.00424897		0.985909	-0.00310444	0.00744841	0.00487756
	17	16.2292	17.3585	17.583	17.2136	16.4732	13.3496	8.46175	3.38004	17	-0.004124	0.004124	0.994582	0.990458	17.5944	0.0113178	0.410764	0.146361		0.993902	-0.0034441	0.00441775	0.00690007
	18	6.52673	6.91751	6.92808	6.70133	6.33583	4.96488	3.02649	1.19491	18	-0.003308	0.003308	0.979082	0.975774	6.96038	0.0323079	0.10659	-0.0146161		0.977227	-0.00145315	0.0246151	0.00769282
	19	6.94443	7.44547	7.52025	7.32365	6.96348	5.52459	3.40319	1.34347	19	-0.002897	0.002897	0.988475	0.985578	7.53247	0.0122189	0.125218	0.0224699		0.988778	-0.00319981	0.00683544	0.00538342
	20	17.9699	19.2277	19.4687	19.0493	18.2195	14.7358	9.2885	3.61056	20	-0.003805	0.003805	0.993579	0.989774	19.4833	0.0145159	0.387583	0.0682589		0.993246	-0.00347193	0.00602537	0.00849051
	21	15.3351	16.375	16.5588	16.1883	15.4764	12.5444	8.05386	3.01978	21	-0.003971	0.003971	0.992182	0.988211	16.5751	0.0163585	0.308185	0.0501105		0.991576	-0.00336472	0.00786588	0.0084926
	22	18.421	19.6319	19.8775	19.4881	18.6975	15.3249	9.95316	4.17934	22	-0.00376	0.00376	0.994653	0.990893	19.8884	0.0109813	0.394712	0.105441		0.994335	-0.00344204	0.00407517	0.00690613
	23	18.1824	19.3101	19.5567	19.2169	18.501	15.3858	10.3196	4.69061	23	-0.004303	0.004303	0.99689	0.992587	19.5633	0.00664764	0.372186	0.0963316		0.996025	-0.00343766	0.00185315	0.00479449
	24	0.105376	2.01598	2.72488	2.81334	2.60708	1.57756	0.515145	0.071803	24	0.003903	0.003903	1.03113	1.03503	2.82763	0.102749	0.00460963	0.103628		1.03213	0.0029006	0.128094	-0.0253454
	25	1.20095	3.11051	3.80907	3.86521	3.60651	2.39647	0.990079	0.245614	25	0.003143	0.003143	1.02702	1.03016	3.89348	0.0844114	-0.00497984	0.0924774		1.02937	0.000788269	0.110826	-0.0264144
	26	7.97577	9.64006	9.97639	9.58987	8.84824	6.21709	3.19565	1.03386	26	0.000762	0.000762	0.992053	0.992815	9.98414	0.00775341	0.154764	0.232139		0.998264	-0.00544908	0.000435646	0.00731776
	27	0.602151	2.63579	3.35795	3.41398	3.15867	2.01249	0.752017	0.155335	27	0.00314	0.00314	1.02688	1.03002	3.44229	0.0843393	0.00419144	0.10029		1.02921	0.000814152	0.11364	-0.0293003
	28	3.49157	5.22194	5.74119	5.60411	5.14357	3.36301	1.41237	0.271054	28	0.002256	0.002256	1.00758	1.00983	5.75244	0.0112443	0.0356832	0.159438		1.01456	-0.0047258	0.0278156	-0.0165713
	29	3.67935	6.17031	6.84711	6.63673	6.03884	3.93693	1.82447	0.552071	29	0.001631	0.001631	1.00549	1.00713	6.85509	0.00797985	0.0403586	0.15409		1.01314	-0.00601813	0.0306508	-0.022671
	30	0.110963	1.02729	1.35041	1.36583	1.23689	0.69203	0.182771	0.006456	30	0.006618	0.006618	1.02057	1.02719	1.3837	0.0332889	-0.0450181	0.0196979		1.02751	-0.000318557	0.0465608	-0.0132719
	31	2.51916	3.2089	3.36541	3.23506	2.96582	2.00895	0.951385	0.261729	31	0.002293	0.002293	0.994244	0.996537	3.3661	0.000690765	-0.0157939	0.0371028		1.00228	-0.00574297	0.000298243	0.000392522
	32	2.70836	3.50744	3.70204	3.57104	3.28142	2.23208	1.05367	0.277912	32	0.002436	0.002436	0.996723	0.999159	3.70208	4.51973e-05	-0.0386342	0.0090812		1.00488	-0.00572469	0.00155306	-0.00150786
	33	0.764551	1.54094	1.8083	1.79853	1.65103	1.02959	0.373598	0.049269	33	0.005098	0.005098	1.01588	1.02098	1.8278	0.0195071	-0.0436612	0.0228041		1.02324	-0.00225528	0.0299283	-0.0104212
	34	2.91887	3.67445	3.81979	3.65128	3.33681	2.25711	1.06638	0.278441	34	-0.000924	0.000924	0.993113	0.992189	3.82379	0.00400459	0.0507567	0.0597936		0.998154	-0.00596547	0.000213795	0.00379079
	35	1.91344	2.54217	2.65134	2.51754	2.28186	1.51579	0.711231	0.191308	35	-0.001563	0.001563	0.992213	0.99065	2.65587	0.00452711	0.0426829	0.0518671		0.997466	-0.0068155	0.000312162	0.00421495
	36	1.48419	1.75788	1.79011	1.6984	1.55092	1.06046	0.512297	0.138908	36	0.001091	0.001091	0.982304	0.983395	1.79793	0.00781682	0.019086	0.0339258		0.988002	-0.00460666	0.00356843	0.00424839
	37	1.66886	2.29906	2.44277	2.35362	2.16093	1.48153	0.71648	0.194453	37	-0.003051	0.003051	1.00202	0.998967	2.44282	4.80788e-05	0.0326382	0.0458221		1.00586	-0.00688967	0.00159749	-0.00154942
	38	2.30091	2.89425	3.03815	2.8931	2.62129	1.73072	0.803855	0.21123	38	-0.001921	0.001921	0.997291	0.99537	3.03943	0.00128236	0.0389796	0.0534334		0.999901	-0.00453094	5.67137e-07	0.00128179
	39	2.14254	3.24254	3.58357	3.49181	3.19344	2.09435	0.91841	0.199481	39	0.001215	0.001215	1.00866	1.00988	3.59117	0.00759428	0.0152886	0.0771653		1.0144	-0.00451933	0.0179467	-0.0103525
	40	1.85878	2.68281	2.90941	2.82401	2.59065	1.72948	0.786207	0.195601	40	0.001994	0.001994	1.00374	1.00573	2.91128	0.0018711	0.0205141	0.0622841		1.01131	-0.00558488	0.0079876	-0.00611651
	41	3.93232	4.79242	4.93376	4.68928	4.1628	2.50794	1.01178	0.227902	41	-0.00098	0.00098	0.989791	0.988811	4.94383	0.0100713	0.0954099	0.13283		0.993317	-0.00450604	0.0034463	0.00662505
	42	3.14593	4.06178	4.22086	4.00123	3.61506	2.35202	1.05203	0.262721	42	-0.000381	0.000381	0.990339	0.989958	4.22906	0.00819094	0.0917017	0.138056		0.996003	-0.00604484	0.0012102	0.00698074
	43	2.95433	3.68368	3.78166	3.56649	3.21714	2.10216	0.955087	0.243577	43	-0.000329	0.000329	0.985624	0.985295	3.79694	0.0152793	0.0825044	0.107937		0.990645	-0.00534973	0.00548139	0.00979795
	44	1.64737	1.96622	1.98672	1.86125	1.67396	1.09294	0.49698	0.123279	44	3.1e-05	3.1e-05	0.978459	0.97849	2.00313	0.016413	-0.00368586	0.010129		0.982021	-0.00353057	0.00943687	0.00697618
	45	1.04531	1.56349	1.69762	1.63779	1.48983	0.966266	0.420584	0.098116	45	0.003204	0.003204	1.00023	1.00343	1.69805	0.000424708	-0.0519532	-0.0169513		1.00958	-0.00614293	0.00355746	-0.00313275
	46	3.81429	4.26368	4.29754	4.09624	3.77452	2.66244	1.21242	0.297776	46	0.000702	0.000702	0.978633	0.979335	4.32087	0.0233313	0.0572906	0.0648693		0.9822	-0.00286496	0.0149017	0.00842953
	47	1.65707	2.6025	2.89781	2.8525	2.64267	1.80356	0.855794	0.237012	47	0.000812	0.000812	1.01343	1.01425	2.90942	0.0116096	0.0290285	0.0814166		1.01835	-0.0041043	0.0229365	-0.011327
	48	2.54666	3.33554	3.56603	3.48901	3.25501	2.32764	1.20594	0.384102	48	0.001166	0.001166	1.00645	1.00761	3.56927	0.0032381	0.0369918	0.0632661		1.01248	-0.00486355	0.00957382	-0.00633571
	49	2.09912	3.0636	3.35433	3.29112	3.05632	2.13397	1.07499	0.344899	49	-0.000151	0.000151	1.01157	1.01141	3.3623	0.00797534	0.0345347	0.0693013		1.01607	-0.00465631	0.0182832	-0.0103079
	50	1.84672	2.63638	2.86486	2.79952	2.59289	1.80226	0.902823	0.277246	50	0.002	0.002	1.00674	1.00874	2.86884	0.00398172	0.00658406	0.0118447		1.01388	-0.005141	0.011323	-0.00734129
	51	1.20308	1.46352	1.51585	1.4559	1.34112	0.933765	0.46263	0.135484	51	0.000866	0.000866	0.99191	0.992776	1.51706	0.00121785	-0.00444781	-0.0219351		0.998305	-0.00552856	6.45453e-05	0.00115331
	52	4.00161	4.6131	4.73718	4.58343	4.28292	3.15593	1.72199	0.564062	52	0.00027	0.00027	0.992134	0.992404	4.74052	0.00333507	0.0370504	0.0145171		0.99733	-0.00492604	0.000396115	0.00293896
	53	3.84881	4.32013	4.40828	4.27029	4.0079	3.00521	1.6679	0.491778	53	-0.000677	0.000677	0.990773	0.990096	4.41297	0.00469199	0.049053	0.00796999		0.994489	-0.00439319	0.00137349	0.00331851
	54	2.76563	3.18554	3.25011	3.12098	2.89572	2.10498	1.16029	0.419038	54	0.001214	0.001214	0.985711	0.986925	3.25736	0.00725105	-0.0217129	-0.030637		0.991668	-0.00474279	0.00268964	0.00456141
	55	3.40283	4.01384	4.16759	4.05688	3.80401	2.81332	1.54164	0.525743	55	0.002166	0.002166	0.996923	0.999089	4.16764	4.332e-05	-0.022855	-0.00036468		1.00407	-0.0049794	0.0008755	-0.00083218
	56	2.45699	3.05074	3.20933	3.10912	2.86149	1.96023	0.950967	0.267291	56	0.002904	0.002904	0.998131	1.00103	3.20938	5.37804e-05	-0.0207883	0.0103838		1.00564	-0.00460477	0.00164631	-0.00159252
	57	3.75648	4.97835	5.31335	5.18283	4.82458	3.45789	1.83675	0.632287	57	0.001506	0.001506	1.00396	1.00547	5.3159	0.0025526	0.0345586	0.0608986		1.01098	-0.0055129	0.0112283	-0.00867568
	58	2.98855	3.9696	4.25883	3.97335	3.51736	2.22589	1.04091	0.287246	58	-0.002815	0.002815	0.999393	0.996578	4.26026	0.00142947	0.110215	0.0232605		1.00016	-0.00358526	3.06349e-06	0.0014264
	59	2.60809	2.87259	2.90708	2.80691	2.6342	2.00295	1.18234	0.461369	59	-0.004558	0.004558	0.988704	0.984146	2.91459	0.00751007	0.0607483	-0.0124069		0.987808	-0.00366207	0.00400352	0.00350655
	60	4.36371	4.84398	4.90792	4.72711	4.41354	3.26262	1.77638	0.559371	60	-0.002573	0.002573	0.986965	0.984392	4.92112	0.013192	0.0518764	-0.044883		0.988063	-0.00367115	0.00697512	0.00621688
	61	2.74138	2.93781	2.91301	2.76125	2.5436	1.81196	0.802397	0.177279	61	-0.001492	0.001492	0.968289	0.966797	2.94879	0.0357757	0.0357705	0.0427897		0.965236	0.00156136	0.0306907	0.00508503
	62	3.19347	3.53833	3.53992	3.35251	3.07219	2.14015	1.06071	0.283102	62	-0.00174	0.00174	0.975793	0.974053	3.57108	0.0311558	0.0329951	0.0430758		0.97542	-0.00136737	0.0228374	0.00831833
	63	2.69145	3.58124	3.79787	3.6603	3.35425	2.26003	1.04046	0.27148	63	0.002164	0.002164	0.997469	0.999633	3.79788	9.2906e-06	-0.00256665	0.0508793		1.00558	-0.00594743	0.00220606	-0.00219677
	64	2.59879	2.95201	2.99435	2.86192	2.64066	1.8687	0.8899	0.193792	64	0.000735	0.000735	0.982549	0.983284	3.00534	0.0109949	0.0028443	0.00434093		0.987113	-0.00382904	0.00580455	0.00519038
	65	3.70059	4.04799	4.10363	3.98042	3.75493	2.88766	1.69428	0.627307	65	-0.006302	0.006302	0.993167	0.986865	4.1103	0.00666198	0.118569	0.00629698		0.990556	-0.0036912	0.00319031	0.00347167
	66	3.43499	3.87	3.96422	3.85203	3.62323	2.72364	1.51635	0.502315	66	0.001304	0.001304	0.992116	0.99342	3.96606	0.00184243	-0.00667185	6.04324e-05		0.997824	-0.00440404	0.000195456	0.00164698

## Sheet: Hobza S66x8 data
	hobza data
																Simple quadratic interpolation
	System	0.9	0.95	1	1.05	1.1	1.25	1.5	2	System	Minimum	De(minimum)	Lowering	S66 Hobza		Minimum	diff.w.quart	Lowering	diff.w.quart
	1	4.57	4.88	4.89	4.72	4.45	3.46	2.11	0.87	1	0.976085	4.91412	0.0241174	5.011		0.977778	-0.00169278	0.0177778	0.00633958
	2	5.19	5.55	5.57	5.38	5.08	3.94	2.39	0.95	2	0.97775	5.59407	0.0240719	5.701		0.979762	-0.0020119	0.0172024	0.00686948
	3	6.49	6.87	6.88	6.65	6.28	4.92	2.98	1.14	3	0.97577	6.91246	0.032458	7.036		0.977083	-0.00131333	0.0252083	0.00724971
	4	7.63	8.06	8.08	7.84	7.46	5.99	3.83	1.44	4	0.977112	8.11146	0.0314623	8.22		0.978846	-0.00173415	0.0232692	0.00819304
	5	5.28	5.69	5.75	5.58	5.28	4.14	2.52	1.01	5	0.98504	5.76122	0.011224	5.851		0.988043	-0.00300348	0.00657609	0.0046479
	6	6.97	7.47	7.54	7.34	6.97	5.5	3.35	1.27	6	0.98483	7.55347	0.0134723	7.666		0.987963	-0.00313296	0.00782407	0.00564823
	7	7.63	8.14	8.22	8.02	7.66	6.18	3.65	1.1	7	0.986095	8.23172	0.0117217	8.337		0.989286	-0.00319071	0.00642857	0.00529314
	8	4.59	4.95	5	4.85	4.59	3.59	2.2	0.91	8	0.98444	5.01063	0.0106333	5.087		0.9875	-0.00306	0.00625	0.00438329
	9	2.81	3.04	3.04	2.9	2.69	1.98	1.1	0.39	9	0.973969	3.0627	0.0226956	3.113		0.975	-0.001031	0.0175	0.00519557
	10	3.7	4.09	4.15	4.01	3.75	2.79	1.31	0.39	10	0.98636	4.15803	0.00803276	4.223		0.99	-0.00364	0.004	0.00403276
	11	4.95	5.36	5.41	5.24	4.94	3.21	1.4	0.46	11	0.983231	5.42366	0.0136638	5.48		0.986364	-0.00313264	0.00818182	0.00548195
	12	6.75	7.2	7.25	7.03	6.66	5.22	3.15	1.2	12	0.98188	7.26968	0.0196808	7.402		0.984259	-0.00237926	0.0133796	0.00630117
	13	5.67	6.11	6.18	6.03	5.74	4.6	2.95	1.3	13	0.987124	6.1878	0.00779559	6.282		0.990909	-0.00378509	0.00363636	0.00415923
	14	6.81	7.34	7.45	7.29	6.97	5.61	3.55	1.49	14	0.9916	7.45397	0.00397319	7.561		0.99537	-0.00377037	0.00115741	0.00281578
	15	8.02	8.53	8.62	8.45	8.1	6.66	4.42	1.77	15	0.988784	8.62685	0.00685177	8.721		0.992308	-0.00352369	0.00307692	0.00377485
	16	4.7	5.06	5.12	4.98	4.74	3.79	2.45	1.13	16	0.986716	5.12768	0.00768458	5.199		0.99	-0.003284	0.004	0.00368458
	17	15.7	16.9	17.18	16.86	16.17	13.15	8.35	3.33	17	0.994582	17.1836	0.00359698	17.448		0.998333	-0.00375133	0.000333333	0.00326365
	18	6.39	6.8	6.83	6.62	6.27	4.93	3.01	1.19	18	0.979082	6.85379	0.0237936	6.975		0.98125	-0.002168	0.016875	0.00691864
	19	6.78	7.31	7.4	7.23	6.88	5.48	3.38	1.33	19	0.988475	7.40725	0.00725208	7.51		0.992308	-0.00383269	0.00307692	0.00417516
	20	17.45	18.79	19.09	18.72	17.94	14.56	9.21	3.59	20	0.993579	19.0957	0.00567604	19.415		0.997388	-0.00380906	0.000914179	0.00476186
	21	14.93	16.03	16.26	15.94	15.26	12.42	8	3	21	0.992182	16.2669	0.00692575	16.525		0.995909	-0.00372709	0.00184091	0.00508484
	22	17.9	19.19	19.49	19.15	18.41	15.14	9.86	4.15	22	0.994653	19.4937	0.00372948	19.783		0.998437	-0.0037845	0.0003125	0.00341698
	23	17.7	18.89	19.19	18.9	18.22	15.21	10.23	4.65	23	0.99689	19.1911	0.00114575	19.467		1.00042	-0.00353373	2.11864e-05	0.00112457
	24	0.23	2.07	2.74	2.8	2.58	1.54	0.49	0.06	24	1.03113	2.82302	0.083018	2.724		1.02992	0.00120897	0.109201	-0.0261828
	25	1.32	3.17	3.83	3.86	3.58	2.36	0.96	0.24	25	1.02702	3.89846	0.0684573	3.801		1.02738	-0.000365952	0.0944643	-0.026007
	26	7.86	9.5	9.82	9.43	8.69	6.07	3.1	0.99	26	0.992053	9.82938	0.00937563	9.752		0.997535	-0.00548221	0.000862676	0.00851295
	27	0.73	2.69	3.37	3.4	3.13	1.97	0.72	0.15	27	1.02688	3.4381	0.0680989	3.342		1.02731	-0.000427692	0.0969423	-0.0288434
	28	3.53	5.22	5.71	5.55	5.08	3.29	1.36	0.25	28	1.00758	5.71676	0.00675501	5.593		1.01269	-0.00511731	0.0209423	-0.0141873
	29	3.74	6.17	6.81	6.58	5.97	3.87	1.78	0.53	29	1.00549	6.81473	0.0047312	6.701		1.01178	-0.00628761	0.0241523	-0.0194211
	30	0.26	1.13	1.41	1.4	1.26	0.69	0.17	-0.01	30	1.02057	1.42872	0.018716	1.364		1.02328	-0.00270586	0.0314224	-0.0127064
	31	2.57	3.24	3.38	3.24	2.96	1.99	0.93	0.25	31	0.994244	3.3819	0.00189671	3.329		1	-0.005756	0	0.00189671
	32	2.79	3.56	3.74	3.59	3.29	2.23	1.04	0.27	32	0.996723	3.74072	0.000715427	3.693		1.00227	-0.00554973	0.000340909	0.000374518
	33	0.89	1.62	1.86	1.83	1.67	1.03	0.37	0.05	33	1.01588	1.87147	0.0114653	1.805		1.01944	-0.00356044	0.0204167	-0.00895134
	34	2.86	3.62	3.77	3.61	3.3	2.24	1.05	0.27	34	0.993113	3.77304	0.00303685	3.764		0.999194	-0.00608055	4.03226e-05	0.00299652
	35	1.85	2.49	2.61	2.48	2.25	1.5	0.7	0.18	35	0.992213	2.61318	0.00318424	2.604		0.999	-0.006787	5e-05	0.00313424
	36	1.45	1.74	1.77	1.68	1.54	1.05	0.5	0.14	36	0.982304	1.77884	0.00883981	1.764		0.9875	-0.005196	0.00375	0.00508981
	37	1.61	2.25	2.41	2.33	2.14	1.47	0.71	0.19	37	1.00202	2.41018	0.000183884	2.397		1.00833	-0.00631533	0.00333333	-0.00314945
	38	2.24	2.84	3	2.86	2.6	1.71	0.79	0.2	38	0.997291	3.00045	0.000453726	2.986		1.00167	-0.00437567	0.000166667	0.000287059
	39	2.16	3.24	3.57	3.47	3.17	2.07	0.9	0.19	39	1.00866	3.57588	0.00587664	3.514		1.01337	-0.00470709	0.0153779	-0.00950127
	40	1.86	2.68	2.89	2.8	2.57	1.7	0.77	0.19	40	1.00374	2.89077	0.000770037	2.849		1.01	-0.006265	0.006	-0.00522996
	41	3.83	4.69	4.84	4.6	4.08	2.44	0.98	0.21	41	0.989791	4.84842	0.00842043	4.811		0.994231	-0.00443977	0.00259615	0.00582427
	42	3.05	3.97	4.13	3.92	3.54	2.29	1.02	0.25	42	0.990339	4.13735	0.00735426	4.091		0.996622	-0.00628262	0.000844595	0.00650967
	43	2.87	3.6	3.7	3.49	3.15	2.05	0.92	0.23	43	0.985624	3.71443	0.014433	3.689		0.991129	-0.00550503	0.00487903	0.00955394
	44	1.66	1.97	1.99	1.86	1.67	1.09	0.49	0.12	44	0.978459	2.00681	0.0168149	1.993		0.981667	-0.00320767	0.0100833	0.00673158
	45	1.13	1.63	1.75	1.68	1.52	0.98	0.42	0.1	45	1.00023	1.75	1.8966e-06	1.715		1.00658	-0.00634995	0.00164474	-0.00164284
	46	3.75	4.21	4.24	4.05	3.73	2.63	1.19	0.29	46	0.978633	4.26358	0.0235787	4.256		0.981818	-0.00318518	0.0145455	0.00903326
	47	1.64	2.58	2.87	2.82	2.6	1.77	0.83	0.22	47	1.01343	2.88039	0.0103881	2.828		1.01765	-0.00421406	0.0211765	-0.0107884
	48	2.53	3.31	3.53	3.45	3.22	2.29	1.18	0.37	48	1.00645	3.53227	0.00227435	3.506		1.01167	-0.00521967	0.00816667	-0.00589232
	49	2.09	3.04	3.32	3.26	3.02	2.1	1.05	0.33	49	1.01157	3.32777	0.00776663	3.293		1.01618	-0.00461047	0.0177941	-0.0100275
	50	1.87	2.65	2.86	2.79	2.58	1.79	0.89	0.27	50	1.00674	2.86226	0.00226066	2.857		1.0125	-0.00576	0.00875	-0.00648934
	51	1.21	1.47	1.52	1.46	1.35	0.93	0.46	0.14	51	0.99191	1.52151	0.00151266	1.539		0.997727	-0.00581727	0.000113636	0.00139903
	52	3.97	4.58	4.7	4.55	4.25	3.13	1.7	0.55	52	0.992134	4.70347	0.00346668	4.726		0.997222	-0.00508822	0.000416667	0.00305001
	53	3.79	4.27	4.36	4.23	3.97	2.97	1.65	0.48	53	0.990773	4.36392	0.003917	4.405		0.995455	-0.00468155	0.000909091	0.00300791
	54	2.8	3.21	3.27	3.13	2.9	2.1	1.16	0.42	54	0.985711	3.27908	0.00907594	3.288		0.99	-0.004289	0.004	0.00507594
	55	3.45	4.05	4.19	4.07	3.8	2.8	1.53	0.52	55	0.996923	4.19049	0.000490336	4.168		1.00192	-0.00500008	0.000192308	0.000298028
	56	2.51	3.09	3.23	3.12	2.86	1.95	0.94	0.26	56	0.998131	3.23017	0.000172054	3.199		1.003	-0.004869	0.00045	-0.000277946
	57	3.75	4.96	5.28	5.14	4.78	3.41	1.8	0.62	57	1.00396	5.28134	0.00134004	5.255		1.00978	-0.00581961	0.00880435	-0.00746431
	58	2.8	3.82	4.15	3.89	3.45	2.18	1.01	0.28	58	0.999393	4.15005	4.56687e-05	4.237		1.00297	-0.0035731	0.00103814	-0.000992467
	59	2.52	2.8	2.85	2.76	2.6	1.98	1.17	0.46	59	0.988704	2.85384	0.00384481	2.927		0.992857	-0.00415314	0.00142857	0.00241623
	60	4.28	4.78	4.86	4.69	4.39	3.26	1.77	0.56	60	0.986965	4.86924	0.0092406	4.966		0.991	-0.004035	0.00405	0.0051906
	61	2.7	2.9	2.88	2.73	2.52	1.79	0.78	0.17	61	0.968289	2.91302	0.0330192	2.906		0.967308	0.000981308	0.0277885	0.00523072
	62	3.15	3.5	3.51	3.32	3.04	2.12	1.04	0.27	62	0.975793	3.53808	0.0280807	3.528		0.9775	-0.001707	0.02025	0.00783068
	63	2.73	3.6	3.8	3.65	3.34	2.24	1.02	0.26	63	0.997469	3.80045	0.000445939	3.747		1.00357	-0.00610243	0.000892857	-0.000446919
	64	2.6	2.95	2.99	2.85	2.63	1.86	0.88	0.19	64	0.982549	3.0025	0.0124966	3.001		0.986111	-0.00356211	0.00694444	0.00555218
	65	3.54	3.91	3.99	3.89	3.68	2.84	1.67	0.62	65	0.993167	3.99173	0.00172817	4.104		0.997222	-0.00405522	0.000277778	0.00145039
	66	3.45	3.88	3.97	3.85	3.62	2.71	1.5	0.49	66	0.992116	3.97273	0.00273228	3.966		0.996429	-0.00431257	0.000535714	0.00219657

## Sheet: geometry comparison VDZ-F12
DF-MP2-F12/cc-pVDZ-F12
																	E2ss=(18E[MP2] – 15E[SCS-MP2] – 3E[SCF])/13
																	E2ab=(15E[SCS-MP2] – 5E[MP2] – 10E[SCF])/13
	our revised S66									Energy difference (kcal/mol) between revised S66 and BEGDB-S66 geometries
					BEGDB-S66
	HF+CABS	MP2-F12	SCS-MP2-F12			HF+CABS	MP2-F12	SCS-MP2-F12		HF+CABS	MP2-F12	SCS-MP2-F12		E2aa+E2bb	E2ab	SCS(MI)MP2-F12
WEIZMANN01_Water-Water_1.00.out	-152.129	-152.723	-152.723		01_Water-Water.out	-152.129	-152.723	-152.723		-0.0147118	0.00113157	-0.00387515		0.00943316	0.00641024	2.1048e-05
WEIZMANN02_Water-MeOH_1.00.out	-191.161	-191.939	-191.944		02_Water-MeOH.out	-191.161	-191.939	-191.944		-0.0195238	0.00216452	-0.00431268		0.0124787	0.00920961	0.000257572
WEIZMANN03_Water-MeNH2_1.00.out	-171.325	-172.074	-172.082		03_Water-MeNH2.out	-171.325	-172.074	-172.082		-0.0184029	0.0026874	-0.00307325		0.0115139	0.00957641	0.000280586
WEIZMANN04_Water-Peptide_1.00.out	-323.176	-324.534	-324.536		04_Water-Peptide.out	-323.176	-324.534	-324.536		-0.034536	0.00203037	-0.0100456		0.0223722	0.0141941	1.83268e-06
WEIZMANN05_MeOH-MeOH_1.00.out	-230.192	-231.154	-231.165		05_MeOH-MeOH.out	-230.192	-231.154	-231.165		-0.0230821	0.00216238	-0.00539662		0.0145476	0.0106969	-3.69704e-05
WEIZMANN06_MeOH-MeNH2_1.00.out	-210.356	-211.29	-211.303		06_MeOH-MeNH2.out	-210.356	-211.29	-211.303		-0.023806	0.00289297	-0.00425562		0.0144097	0.0122893	-0.000301804
WEIZMANN07_MeOH-Peptide_1.00.out	-362.207	-363.749	-363.757		07_MeOH-Peptide.out	-362.207	-363.749	-363.757		-0.065267	0.00200972	-0.0203986		0.0413811	0.0258955	-0.00152707
WEIZMANN08_MeOH-Water_1.00.out	-191.16	-191.938	-191.943		08_MeOH-Water.out	-191.16	-191.938	-191.943		-0.0173599	0.00116863	-0.00466602		0.0110081	0.0075204	-0.000151264
WEIZMANN09_MeNH2-MeOH_1.00.out	-210.352	-211.282	-211.297		09_MeNH2-MeOH.out	-210.352	-211.282	-211.297		-0.0203497	0.000775872	-0.00457652		0.011051	0.0100746	-0.00206409
WEIZMANN10_MeNH2-MeNH2_1.00.out	-190.515	-191.417	-191.434		10_MeNH2-MeNH2.out	-190.515	-191.417	-191.434		-0.044202	0.00342145	-0.00791619		0.0240719	0.0235515	-0.00372861
WEIZMANN11_MeNH2-Peptide_1.00.out	-342.365	-343.878	-343.888		11_MeNH2-Peptide.out	-342.365	-343.878	-343.888		-0.098118	0.00431048	-0.0216224		0.0535599	0.0488686	-0.00947833
WEIZMANN12_MeNH2-Water_1.00.out	-171.325	-172.074	-172.083		12_MeNH2-Water.out	-171.325	-172.074	-172.083		-0.0206448	0.00316024	-0.00322624		0.0128625	0.0109425	0.00032484
WEIZMANN13_Peptide-MeOH_1.00.out	-362.205	-363.747	-363.754		13_Peptide-MeOH.out	-362.205	-363.747	-363.754		-0.0361413	0.00304833	-0.00729329		0.0209764	0.0182133	-0.00179646
WEIZMANN14_Peptide-MeNH2_1.00.out	-342.368	-343.881	-343.892		14_Peptide-MeNH2.out	-342.368	-343.881	-343.892		-0.0407991	0.00519583	-0.00618361		0.0237443	0.0222506	-0.00126866
WEIZMANN15_Peptide-Peptide_1.00.out	-494.218	-496.342	-496.346		15_Peptide-Peptide.out	-494.218	-496.342	-496.346		-0.0564359	0.00435068	-0.012298		0.0332377	0.0275489	-0.00253974
WEIZMANN16_Peptide-Water_1.00.out	-323.173	-324.53	-324.532		16_Peptide-Water.out	-323.173	-324.53	-324.532		-0.0239673	0.00142704	-0.00564301		0.014018	0.0113763	-0.00133355
WEIZMANN17_Uracil-Uracil_BP_1.00.out	-825.276	-828.579	-828.531		17_Uracil-Uracil_BP.out	-825.276	-828.579	-828.531		-0.0624	0.00783159	-0.0186086		0.0467152	0.0235164	0.00726918
WEIZMANN18_Water-Pyridine_1.00.out	-322.85	-324.238	-324.229		18_Water-Pyridine.out	-322.85	-324.238	-324.229		-0.0262677	0.00402562	-0.0039048		0.0161412	0.014152	0.000215365
WEIZMANN19_MeOH-Pyridine_1.00.out	-361.881	-363.454	-363.45		19_MeOH-Pyridine.out	-361.881	-363.454	-363.45		-0.0342181	0.00533096	-0.0051268		0.0211934	0.0183557	0.0004636
WEIZMANN20_AcOH-AcOH_1.00.out	-455.836	-457.64	-457.63		20_AcOH-AcOH.out	-455.836	-457.64	-457.63		-0.0417958	0.00454166	-0.016584		0.035069	0.0112685	0.00795057
WEIZMANN21_AcNH2-AcNH2_1.00.out	-416.148	-417.89	-417.887		21_AcNH2-AcNH2.out	-416.148	-417.89	-417.887		-0.0678348	0.0048756	-0.0190597		0.044397	0.0283134	0.000762651
WEIZMANN22_AcOH-Uracil_1.00.out	-640.558	-643.111	-643.082		22_AcOH-Uracil.out	-640.558	-643.111	-643.082		-0.0507326	0.00625822	-0.0167029		0.0396453	0.0173455	0.00734805
WEIZMANN23_AcNH2-Uracil_1.00.out	-620.716	-623.238	-623.212		23_AcNH2-Uracil.out	-620.716	-623.238	-623.212		-0.0557183	0.00655467	-0.0159262		0.0403101	0.0219628	0.0050669
WEIZMANN24_Benzene-Benzene_pi-pi_1.00.out	-461.562	-463.672	-463.66		24_Benzene-Benzene_pi-pi.out	-461.562	-463.672	-463.66		0.141624	-0.041439	-0.00587361		-0.0832824	-0.0997808	-0.00572248
WEIZMANN25_Pyridine-Pyridine_pi-pi_1.00.out	-493.558	-495.749	-495.729		25_Pyridine-Pyridine_pi-pi.out	-493.558	-495.749	-495.729		0.136666	-0.041077	-0.00646778		-0.0809513	-0.0967918	-0.00647778
WEIZMANN26_Uracil-Uracil_pi-pi_1.00.out	-825.257	-828.57	-828.521		26_Uracil-Uracil_pi-pi.out	-825.257	-828.57	-828.521		0.0318933	-0.00474195	0.00356759		-0.0180422	-0.018593	0.00118163
WEIZMANN27_Benzene-Pyridine_pi-pi_1.00.out	-477.56	-479.711	-479.695		27_Benzene-Pyridine_pi-pi.out	-477.56	-479.711	-479.695		0.126487	-0.0367974	-0.00493873		-0.0744411	-0.0888436	-0.00507925
WEIZMANN28_Benzene-Uracil_pi-pi_1.00.out	-643.409	-646.121	-646.09		28_Benzene-Uracil_pi-pi.out	-643.408	-646.121	-646.09		0.0787729	-0.0171548	0.00258808		-0.0449174	-0.0510103	0.000425323
WEIZMANN29_Pyridine-Uracil_pi-pi_1.00.out	-659.408	-662.16	-662.125		29_Pyridine-Uracil_pi-pi.out	-659.408	-662.16	-662.125		0.0654013	-0.0140956	0.00244632		-0.0374323	-0.0420646	0.000287773
WEIZMANN30_Benzene-Ethene_1.00.out	-308.846	-310.271	-310.275		30_Benzene-Ethene.out	-308.845	-310.271	-310.275		0.135581	-0.0317199	0.000660402		-0.0759698	-0.091331	0.00104744
WEIZMANN31_Uracil-Ethene_1.00.out	-490.693	-492.718	-492.704		31_Uracil-Ethene.out	-490.693	-492.718	-492.704		0.0495263	-0.00775058	0.00412744		-0.0269232	-0.0303538	0.00265395
WEIZMANN32_Uracil-Ethyne_1.00.out	-489.479	-491.477	-491.456		32_Uracil-Ethyne.out	-489.479	-491.477	-491.456		0.05423	-0.01078	0.00298211		-0.0308816	-0.0341283	0.000741345
WEIZMANN33_Pyridine-Ethene_1.00.out	-324.844	-326.309	-326.309		33_Pyridine-Ethene.out	-324.843	-326.31	-326.309		0.109391	-0.025776	0.000786454		-0.0618413	-0.0733256	0.000285402
WEIZMANN34_Pentane-Pentane_1.00.out	-392.809	-394.783	-394.826		34_Pentane-Pentane.out	-392.809	-394.783	-394.826		-0.0187914	0.000919918	-0.00329018		0.00940657	0.0103048	-0.00253503
WEIZMANN35_Neopentane-Pentane_1.00.out	-392.811	-394.789	-394.831		35_Neopentane-Pentane.out	-392.811	-394.789	-394.831		-0.00769671	0.000324628	-0.00139462		0.00383483	0.00418652	-0.00107518
WEIZMANN36_Neopentane-Neopentane_1.00.out	-392.812	-394.795	-394.836		36_Neopentane-Neopentane.out	-392.812	-394.795	-394.836		0.0028597	-5.76493e-05	0.000552829		-0.00137763	-0.00153972	0.000466669
WEIZMANN37_Cyclopentane-Neopentane_1.00.out	-391.637	-393.588	-393.622		37_Cyclopentane-Neopentane.out	-391.637	-393.588	-393.622		-0.0461399	0.00207792	-0.00829274		0.0230933	0.0251245	-0.0062997
WEIZMANN38_Cyclopentane-Cyclopentane_1.00.out	-390.462	-392.38	-392.409		38_Cyclopentane-Cyclopentane.out	-390.462	-392.38	-392.409		-0.0261904	0.00146802	-0.00453364		0.0133077	0.0143507	-0.00328317
WEIZMANN39_Benzene-Cyclopentane_1.00.out	-426.012	-428.027	-428.035		39_Benzene-Cyclopentane.out	-426.012	-428.027	-428.035		0.0202308	-0.00357562	0.00129888		-0.0111182	-0.0126882	0.00081305
WEIZMANN40_Benzene-Neopentane_1.00.out	-427.188	-429.234	-429.249		40_Benzene-Neopentane.out	-427.188	-429.234	-429.249		0.0140035	-0.00226739	0.00102211		-0.00755039	-0.00872048	0.000775289
WEIZMANN41_Uracil-Pentane_1.00.out	-609.031	-611.674	-611.671		41_Uracil-Pentane.out	-609.031	-611.674	-611.671		-0.0599078	0.00623134	-0.00808986		0.0317873	0.0343518	-0.00516142
WEIZMANN42_Uracil-Cyclopentane_1.00.out	-607.858	-610.472	-610.462		42_Uracil-Cyclopentane.out	-607.858	-610.472	-610.462		-0.00393067	0.00043133	-0.00050008		0.00208132	0.00228068	-0.000333496
WEIZMANN43_Uracil-Neopentane_1.00.out	-609.034	-611.679	-611.675		43_Uracil-Neopentane.out	-609.034	-611.679	-611.675		0.0113225	-0.00101114	0.00161991		-0.00588206	-0.00645163	0.00115404
WEIZMANN44_Ethene-Pentane_1.00.out	-274.47	-275.827	-275.859		44_Ethene-Pentane.out	-274.47	-275.827	-275.859		0.0407132	-0.00289109	0.0062909		-0.0206571	-0.0229472	0.00488664
WEIZMANN45_Ethyne-Pentane_1.00.out	-273.255	-274.585	-274.611		45_Ethyne-Pentane.out	-273.255	-274.585	-274.611		0.0589958	-0.00771692	0.00543626		-0.030572	-0.0361407	0.00510165
WEIZMANN46_Peptide-Pentane_1.00.out	-443.509	-445.56	-445.583		46_Peptide-Pentane.out	-443.509	-445.56	-445.583		-0.0686324	0.00411062	-0.0117719		0.0351129	0.0376301	-0.00828474
WEIZMANN47_Benzene-Benzene_TS_1.00.out	-461.566	-463.671	-463.66		47_Benzene-Benzene_TS.out	-461.566	-463.671	-463.66		-0.000784059	0.000160364	-2.37418e-05		0.000430374	0.000514049	-2.32565e-05
WEIZMANN48_Pyridine-Pyridine_TS_1.00.out	-493.562	-495.746	-495.727		48_Pyridine-Pyridine_TS.out	-493.562	-495.746	-495.727		0.00445127	-0.000925836	0.000214645		-0.00255681	-0.0028203	2.48681e-05
WEIZMANN49_Benzene-Pyridine_TS_1.00.out	-477.564	-479.709	-479.694		49_Benzene-Pyridine_TS.out	-477.564	-479.709	-479.694		-0.000375628	8.01976e-05	-1.49391e-05		0.000214964	0.000240862	-1.98005e-06
WEIZMANN50_Benzene-Ethyne_CH-pi_1.00.out	-307.635	-309.031	-309.029		50_Benzene-Ethyne_CH-pi.out	-307.634	-309.031	-309.029		0.014663	-0.00339241	0.000576935		-0.00874665	-0.00930879	-0.000343659
WEIZMANN51_Ethyne-Ethyne_TS_1.00.out	-153.701	-154.389	-154.396		51_Ethyne-Ethyne_TS.out	-153.701	-154.389	-154.396		0.000430583	-6.77842e-05	4.2547e-05		-0.000242313	-0.000256054	1.55773e-05
WEIZMANN52_Benzene-AcOH_OH-pi_1.00.out	-458.693	-460.647	-460.638		52_Benzene-AcOH_OH-pi.out	-458.693	-460.647	-460.638		0.00545679	-0.000940751	0.000451572		-0.00308288	-0.00331466	0.00015401
WEIZMANN53_Benzene-AcNH2_NH-pi_1.00.out	-438.851	-440.773	-440.766		53_Benzene-AcNH2_NH-pi.out	-438.851	-440.773	-440.766		-0.0155363	0.00220813	-0.0017127		0.00861891	0.00912553	-0.000767705
WEIZMANN54_Benzene-Water_OH-pi_1.00.out	-306.847	-308.195	-308.19		54_Benzene-Water_OH-pi.out	-306.847	-308.195	-308.19		0.030853	-0.00479785	0.00272134		-0.0169031	-0.0187478	0.0015489
WEIZMANN55_Benzene-MeOH_OH-pi_1.00.out	-345.877	-347.412	-347.412		55_Benzene-MeOH_OH-pi.out	-345.877	-347.412	-347.412		0.0434941	-0.00703059	0.00342304		-0.0237214	-0.0268033	0.00217216
WEIZMANN56_Benzene-MeNH2_NH-pi_1.00.out	-326.039	-327.543	-327.546		56_Benzene-MeNH2_NH-pi.out	-326.039	-327.543	-327.546		0.048684	-0.00794955	0.00363908		-0.0264408	-0.0301928	0.00249829
WEIZMANN57_Benzene-Peptide_NH-pi_1.00.out	-477.889	-480.006	-480.002		57_Benzene-Peptide_NH-pi.out	-477.889	-480.006	-480.002		0.0103495	-0.00185557	0.000640313		-0.00569641	-0.00650861	0.00039764
WEIZMANN58_Pyridine-Pyridine_CH-N_1.00.out	-493.565	-495.746	-495.728		58_Pyridine-Pyridine_CH-N.out	-493.565	-495.746	-495.728		-0.0301991	0.00600975	-0.00275181		0.0184654	0.0177435	0.000718612
WEIZMANN59_Ethyne-Water_CH-O_1.00.out	-152.915	-153.555	-153.559		59_Ethyne-Water_CH-O.out	-152.915	-153.555	-153.559		-0.0165634	0.000665956	-0.00562094		0.0112301	0.00599924	0.000323144
WEIZMANN60_Ethyne-AcOH_OH-pi_1.00.out	-304.762	-306.008	-306.007		60_Ethyne-AcOH_OH-pi.out	-304.762	-306.008	-306.007		-0.0242783	0.00302649	-0.0040507		0.0144671	0.0128377	-0.000480673
WEIZMANN61_Pentane-AcOH_1.00.out	-424.312	-426.2	-426.217		61_Pentane-AcOH.out	-424.312	-426.2	-426.217		-0.0981181	0.00355767	-0.0188181		0.0492819	0.0523939	-0.0135869
WEIZMANN62_Pentane-AcNH2_1.00.out	-404.47	-406.327	-406.348		62_Pentane-AcNH2.out	-404.47	-406.327	-406.348		0.00305911	-0.000163723	0.000550729		-0.0015681	-0.00165474	0.000374371
WEIZMANN63_Benzene-AcOH_1.00.out	-458.69	-460.646	-460.636		63_Benzene-AcOH.out	-458.69	-460.646	-460.636		0.0444735	-0.00760735	0.00337534		-0.024691	-0.0273898	0.00166616
WEIZMANN64_Peptide-Ethene_1.00.out	-325.171	-326.604	-326.616		64_Peptide-Ethene.out	-325.171	-326.604	-326.616		-0.0277195	0.00193281	-0.00475829		0.0145633	0.015089	-0.0028972
WEIZMANN65_Pyridine-Ethyne_1.00.out	-323.636	-325.07	-325.064		65_Pyridine-Ethyne.out	-323.636	-325.07	-325.064		-0.0332883	0.00500958	-0.0065009		0.0221193	0.0161786	0.00171704
WEIZMANN66_MeNH2-Pyridine_1.00.out	-342.038	-343.582	-343.581		66_MeNH2-Pyridine.out	-342.038	-343.582	-343.581		0.0105353	-0.00165552	0.000970843		-0.00584369	-0.00634716	0.000458102

## Sheet: geometry comparison VTZ-F12
DF-MP2-F12/cc-pVTZ-F12
																	E2ss=(18E[MP2] – 15E[SCS-MP2] – 3E[SCF])/13
																	E2ab=(15E[SCS-MP2] – 5E[MP2] – 10E[SCF])/13
					BEGDB-S66					Energy difference (kcal/mol) between revised S66 and BEGDB-S66 geometries
															RMSD	0.00371497		0.00359207
	HF+CABS	MP2-F12	SCS-MP2-F12			HF+CABS	MP2-F12	SCS-MP2-F12		HF+CABS	MP2-F12	SCS-MP2-F12		E2aa+E2bb	E2ab	SCS(MI)MP2-F12		ditto VDZ-F12
WEIZMANN01_Water-Water_1.00.out	-152.138	-152.739	-152.74		01_Water-Water.out	-152.138	-152.739	-152.74		-0.0147591	0.00125286	-0.00369618		0.0094055	0.00660649	1.65564e-05		2.1048e-05
WEIZMANN02_Water-MeOH_1.00.out	-191.172	-191.958	-191.964		02_Water-MeOH.out	-191.172	-191.958	-191.964		-0.0196266	0.00224664	-0.00413651		0.0124128	0.00946042	0.000170108		0.000257572
WEIZMANN03_Water-MeNH2_1.00.out	-171.335	-172.09	-172.099		03_Water-MeNH2.out	-171.335	-172.09	-172.099		-0.0185585	0.00273841	-0.00298991		0.0115243	0.00977261	0.000216879		0.000280586
WEIZMANN04_Water-Peptide_1.00.out	-323.193	-324.563	-324.567		04_Water-Peptide.out	-323.194	-324.563	-324.567		-0.03473	0.00232291	-0.00958932		0.0222956	0.0147574	-6.57933e-05		1.83268e-06
WEIZMANN05_MeOH-MeOH_1.00.out	-230.205	-231.177	-231.188		05_MeOH-MeOH.out	-230.205	-231.177	-231.188		-0.0231348	0.00239062	-0.00507941		0.0145097	0.0110156	-1.09321e-05		-3.69704e-05
WEIZMANN06_MeOH-MeNH2_1.00.out	-210.368	-211.309	-211.323		06_MeOH-MeNH2.out	-210.368	-211.309	-211.323		-0.0239764	0.00298249	-0.00413154		0.0144298	0.0125291	-0.000350349		-0.000301804
WEIZMANN07_MeOH-Peptide_1.00.out	-362.227	-363.782	-363.79		07_MeOH-Peptide.out	-362.227	-363.782	-363.79		-0.0654946	0.00298555	-0.0191837		0.041383	0.0270972	-0.00127168		-0.00152707
WEIZMANN08_MeOH-Water_1.00.out	-191.171	-191.957	-191.963		08_MeOH-Water.out	-191.171	-191.957	-191.963		-0.0173518	0.00139513	-0.00437424		0.0109832	0.00776376	-7.80034e-05		-0.000151264
WEIZMANN09_MeNH2-MeOH_1.00.out	-210.363	-211.302	-211.317		09_MeNH2-MeOH.out	-210.363	-211.302	-211.317		-0.0203939	0.00085231	-0.00446245		0.0110354	0.0102108	-0.00207392		-0.00206409
WEIZMANN10_MeNH2-MeNH2_1.00.out	-190.525	-191.433	-191.451		10_MeNH2-MeNH2.out	-190.525	-191.433	-191.451		-0.0443586	0.00349679	-0.00778282		0.0240585	0.0237969	-0.00380438		-0.00372861
WEIZMANN11_MeNH2-Peptide_1.00.out	-342.383	-343.907	-343.919		11_MeNH2-Peptide.out	-342.383	-343.907	-343.919		-0.098224	0.00546337	-0.0202739		0.0536247	0.0500626	-0.00902301		-0.00947833
WEIZMANN12_MeNH2-Water_1.00.out	-171.334	-172.09	-172.1		12_MeNH2-Water.out	-171.334	-172.09	-172.1		-0.0208204	0.00319208	-0.00313657		0.0128436	0.0111688	0.000215439		0.00032484
WEIZMANN13_Peptide-MeOH_1.00.out	-362.224	-363.779	-363.788		13_Peptide-MeOH.out	-362.224	-363.779	-363.788		-0.0362132	0.00334522	-0.00690228		0.0209529	0.0186055	-0.00174174		-0.00179646
WEIZMANN14_Peptide-MeNH2_1.00.out	-342.386	-343.91	-343.922		14_Peptide-MeNH2.out	-342.386	-343.91	-343.922		-0.0411617	0.00527311	-0.00604084		0.0237703	0.0226645	-0.00143224		-0.00126866
WEIZMANN15_Peptide-Peptide_1.00.out	-494.244	-496.384	-496.39		15_Peptide-Peptide.out	-494.244	-496.384	-496.39		-0.0568357	0.00442795	-0.0120712		0.0331753	0.0280884	-0.00280425		-0.00253974
WEIZMANN16_Peptide-Water_1.00.out	-323.19	-324.559	-324.563		16_Peptide-Water.out	-323.19	-324.559	-324.563		-0.024038	0.00165892	-0.00534214		0.0140082	0.0116887	-0.00129191		-0.00133355
WEIZMANN17_Uracil-Uracil_BP_1.00.out	-825.319	-828.649	-828.604		17_Uracil-Uracil_BP.out	-825.319	-828.649	-828.604		-0.0629742	0.0097188	-0.0165322		0.0470649	0.0256281	0.00799078		0.00726918
WEIZMANN18_Water-Pyridine_1.00.out	-322.866	-324.265	-324.257		18_Water-Pyridine.out	-322.866	-324.265	-324.257		-0.026374	0.00392341	-0.00390267		0.0160218	0.0142756	4.36537e-06		0.000215365
WEIZMANN19_MeOH-Pyridine_1.00.out	-361.9	-363.484	-363.481		19_MeOH-Pyridine.out	-361.9	-363.484	-363.481		-0.0343482	0.00528695	-0.00505736		0.0210823	0.0185529	0.000269096		0.0004636
WEIZMANN20_AcOH-AcOH_1.00.out	-455.861	-457.682	-457.674		20_AcOH-AcOH.out	-455.861	-457.682	-457.674		-0.042059	0.00640268	-0.0144844		0.0352839	0.0131777	0.00872839		0.00795057
WEIZMANN21_AcNH2-AcNH2_1.00.out	-416.17	-417.926	-417.925		21_AcNH2-AcNH2.out	-416.17	-417.926	-417.925		-0.0683224	0.0053376	-0.0183567		0.044338	0.029322	0.000602402		0.000762651
WEIZMANN22_AcOH-Uracil_1.00.out	-640.592	-643.167	-643.141		22_AcOH-Uracil.out	-640.593	-643.167	-643.141		-0.0511304	0.0083725	-0.0144089		0.0400177	0.0194852	0.00828654		0.00734805
WEIZMANN23_AcNH2-Uracil_1.00.out	-620.748	-623.291	-623.268		23_AcNH2-Uracil.out	-620.748	-623.291	-623.268		-0.056219	0.00825981	-0.0140769		0.0406528	0.023826	0.00575352		0.0050669
WEIZMANN24_Benzene-Benzene_pi-pi_1.00.out	-461.584	-463.707	-463.695		24_Benzene-Benzene_pi-pi.out	-461.584	-463.707	-463.695		0.142512	-0.0416901	-0.00593888		-0.0837596	-0.100442	-0.00571494		-0.00572248
WEIZMANN25_Pyridine-Pyridine_pi-pi_1.00.out	-493.582	-495.786	-495.767		25_Pyridine-Pyridine_pi-pi.out	-493.582	-495.786	-495.767		0.137408	-0.041376	-0.00657378		-0.0814142	-0.0973696	-0.00656439		-0.00647778
WEIZMANN26_Uracil-Uracil_pi-pi_1.00.out	-825.301	-828.64	-828.594		26_Uracil-Uracil_pi-pi.out	-825.301	-828.64	-828.594		0.032068	-0.00503562	0.00323929		-0.0181103	-0.0189933	0.00110833		0.00118163
WEIZMANN27_Benzene-Pyridine_pi-pi_1.00.out	-477.583	-479.747	-479.731		27_Benzene-Pyridine_pi-pi.out	-477.583	-479.747	-479.731		0.127261	-0.0372693	-0.00518042		-0.0749941	-0.089536	-0.00529598		-0.00507925
WEIZMANN28_Benzene-Uracil_pi-pi_1.00.out	-643.441	-646.173	-646.144		28_Benzene-Uracil_pi-pi.out	-643.441	-646.173	-646.144		0.0792648	-0.0174626	0.00230865		-0.0451348	-0.0515927	0.0004039		0.000425323
WEIZMANN29_Pyridine-Uracil_pi-pi_1.00.out	-659.441	-662.214	-662.181		29_Pyridine-Uracil_pi-pi.out	-659.441	-662.214	-662.181		0.0657454	-0.0142504	0.00233229		-0.0375944	-0.0424014	0.000288046		0.000287773
WEIZMANN30_Benzene-Ethene_1.00.out	-308.861	-310.295	-310.299		30_Benzene-Ethene.out	-308.86	-310.295	-310.299		0.136473	-0.0318345	0.000730364		-0.0764151	-0.0918926	0.00114063		0.00104744
WEIZMANN31_Uracil-Ethene_1.00.out	-490.719	-492.759	-492.747		31_Uracil-Ethene.out	-490.719	-492.759	-492.747		0.0497439	-0.00719724	0.00468602		-0.0268517	-0.0300894	0.00306941		0.00265395
WEIZMANN32_Uracil-Ethyne_1.00.out	-489.504	-491.517	-491.498		32_Uracil-Ethyne.out	-489.504	-491.517	-491.498		0.054294	-0.0104566	0.00329179		-0.030806	-0.0339446	0.000976416		0.000741345
WEIZMANN33_Pyridine-Ethene_1.00.out	-324.859	-326.334	-326.334		33_Pyridine-Ethene.out	-324.859	-326.334	-326.334		0.109964	-0.0262567	0.000516112		-0.0623273	-0.0738938	4.69436e-06		0.000285402
WEIZMANN34_Pentane-Pentane_1.00.out	-392.828	-394.815	-394.858		34_Pentane-Pentane.out	-392.828	-394.815	-394.858		-0.0188805	0.000865799	-0.00333859		0.00940806	0.0103382	-0.0026088		-0.00253503
WEIZMANN35_Neopentane-Pentane_1.00.out	-392.83	-394.82	-394.863		35_Neopentane-Pentane.out	-392.83	-394.82	-394.863		-0.00774834	0.000266964	-0.00144987		0.00383065	0.00418465	-0.00113294		-0.00107518
WEIZMANN36_Neopentane-Neopentane_1.00.out	-392.832	-394.826	-394.868		36_Neopentane-Neopentane.out	-392.832	-394.826	-394.868		0.00288176	-3.28457e-05	0.000576632		-0.00137584	-0.00153876	0.000491414		0.000466669
WEIZMANN37_Cyclopentane-Neopentane_1.00.out	-391.656	-393.619	-393.654		37_Cyclopentane-Neopentane.out	-391.656	-393.619	-393.654		-0.0464493	0.00175008	-0.00860627		0.0230726	0.0251268	-0.00663496		-0.0062997
WEIZMANN38_Cyclopentane-Cyclopentane_1.00.out	-390.48	-392.411	-392.44		38_Cyclopentane-Cyclopentane.out	-390.48	-392.411	-392.44		-0.0263535	0.0013318	-0.00466691		0.0133105	0.0143748	-0.00343302		-0.00328317
WEIZMANN39_Benzene-Cyclopentane_1.00.out	-426.033	-428.06	-428.069		39_Benzene-Cyclopentane.out	-426.033	-428.06	-428.069		0.0203858	-0.00341515	0.00145273		-0.0111093	-0.0126917	0.000978143		0.00081305
WEIZMANN40_Benzene-Neopentane_1.00.out	-427.209	-429.267	-429.282		40_Benzene-Neopentane.out	-427.209	-429.267	-429.282		0.0141099	-0.00212212	0.00115677		-0.00752919	-0.00870285	0.000916123		0.000775289
WEIZMANN41_Uracil-Pentane_1.00.out	-609.063	-611.724	-611.723		41_Uracil-Pentane.out	-609.063	-611.724	-611.723		-0.0602623	0.00679321	-0.007502		0.0319688	0.0350867	-0.00498783		-0.00516142
WEIZMANN42_Uracil-Cyclopentane_1.00.out	-607.889	-610.522	-610.514		42_Uracil-Cyclopentane.out	-607.889	-610.522	-610.514		-0.0039593	0.00121344	0.000258608		0.00229544	0.0028773	0.000152735		-0.000333496
WEIZMANN43_Uracil-Neopentane_1.00.out	-609.065	-611.73	-611.728		43_Uracil-Neopentane.out	-609.065	-611.73	-611.728		0.0113781	-8.80395e-06	0.00256352		-0.00559581	-0.00579107	0.00184305		0.00115404
WEIZMANN44_Ethene-Pentane_1.00.out	-274.484	-275.849	-275.881		44_Ethene-Pentane.out	-274.484	-275.849	-275.881		0.0408811	-0.00271763	0.00645565		-0.0206458	-0.022953	0.00506686		0.00488664
WEIZMANN45_Ethyne-Pentane_1.00.out	-273.268	-274.606	-274.632		45_Ethyne-Pentane.out	-273.268	-274.606	-274.632		0.059086	-0.00803117	0.00522577		-0.030785	-0.0363321	0.00484043		0.00510165
WEIZMANN46_Peptide-Pentane_1.00.out	-443.531	-445.597	-445.621		46_Peptide-Pentane.out	-443.531	-445.597	-445.621		-0.0690284	0.00424429	-0.0115635		0.0351488	0.0381239	-0.00843685		-0.00828474
WEIZMANN47_Benzene-Benzene_TS_1.00.out	-461.588	-463.705	-463.695		47_Benzene-Benzene_TS.out	-461.588	-463.705	-463.695		-0.000790681	0.000166945	-1.87412e-05		0.000435243	0.000522382	-2.02642e-05		-2.32565e-05
WEIZMANN48_Pyridine-Pyridine_TS_1.00.out	-493.586	-495.784	-495.765		48_Pyridine-Pyridine_TS.out	-493.586	-495.784	-495.765		0.00447537	-0.000913287	0.00022903		-0.00256159	-0.00282706	4.00881e-05		2.48681e-05
WEIZMANN49_Benzene-Pyridine_TS_1.00.out	-477.587	-479.745	-479.73		49_Benzene-Pyridine_TS.out	-477.587	-479.745	-479.73		-0.000378118	9.05735e-05	1.51901e-05		0.00019514	0.000273551	-1.69666e-05		-1.98005e-06
WEIZMANN50_Benzene-Ethyne_CH-pi_1.00.out	-307.649	-309.054	-309.052		50_Benzene-Ethyne_CH-pi.out	-307.649	-309.054	-309.052		0.0148324	-0.00338851	0.000599311		-0.00880615	-0.00941474	-0.000293449		-0.000343659
WEIZMANN51_Ethyne-Ethyne_TS_1.00.out	-153.708	-154.4	-154.407		51_Ethyne-Ethyne_TS.out	-153.708	-154.4	-154.407		0.000433297	-6.75219e-05	4.34851e-05		-0.000243659	-0.00025716	1.61133e-05		1.55773e-05
WEIZMANN52_Benzene-AcOH_OH-pi_1.00.out	-458.717	-460.685	-460.677		52_Benzene-AcOH_OH-pi.out	-458.717	-460.685	-460.677		0.00550891	-0.000822374	0.000576374		-0.00307501	-0.00325627	0.000239639		0.00015401
WEIZMANN53_Benzene-AcNH2_NH-pi_1.00.out	-438.873	-440.808	-440.803		53_Benzene-AcNH2_NH-pi.out	-438.873	-440.808	-440.803		-0.0156744	0.0021906	-0.0017068		0.00861969	0.00924533	-0.000856888		-0.000767705
WEIZMANN54_Benzene-Water_OH-pi_1.00.out	-306.862	-308.221	-308.216		54_Benzene-Water_OH-pi.out	-306.862	-308.221	-308.216		0.031186	-0.00454178	0.00295678		-0.016897	-0.0188307	0.00185651		0.0015489
WEIZMANN55_Benzene-MeOH_OH-pi_1.00.out	-345.895	-347.441	-347.441		55_Benzene-MeOH_OH-pi.out	-345.895	-347.441	-347.441		0.0438517	-0.00684258	0.00361127		-0.0237608	-0.0269335	0.00242689		0.00217216
WEIZMANN56_Benzene-MeNH2_NH-pi_1.00.out	-326.055	-327.569	-327.572		56_Benzene-MeNH2_NH-pi.out	-326.055	-327.569	-327.572		0.049109	-0.00765921	0.00396401		-0.0265118	-0.0302565	0.00280625		0.00249829
WEIZMANN57_Benzene-Peptide_NH-pi_1.00.out	-477.913	-480.045	-480.042		57_Benzene-Peptide_NH-pi.out	-477.913	-480.045	-480.042		0.0104392	-0.00160997	0.000891314		-0.00566667	-0.00638247	0.000576178		0.00039764
WEIZMANN58_Pyridine-Pyridine_CH-N_1.00.out	-493.589	-495.783	-495.766		58_Pyridine-Pyridine_CH-N.out	-493.589	-495.783	-495.766		-0.0303556	0.00589867	-0.00280303		0.0184068	0.0178475	0.000528139		0.000718612
WEIZMANN59_Ethyne-Water_CH-O_1.00.out	-152.923	-153.569	-153.573		59_Ethyne-Water_CH-O.out	-152.923	-153.569	-153.573		-0.0166251	0.0008286	-0.00542029		0.011238	0.00621563	0.000358249		0.000323144
WEIZMANN60_Ethyne-AcOH_OH-pi_1.00.out	-304.778	-306.034	-306.034		60_Ethyne-AcOH_OH-pi.out	-304.778	-306.034	-306.034		-0.0242923	0.00323037	-0.00379443		0.0144569	0.0130658	-0.000416566		-0.000480673
WEIZMANN61_Pentane-AcOH_1.00.out	-424.334	-426.237	-426.255		61_Pentane-AcOH.out	-424.334	-426.237	-426.255		-0.098639	0.00388952	-0.018418		0.0493999	0.0531286	-0.0136617		-0.0135869
WEIZMANN62_Pentane-AcNH2_1.00.out	-404.49	-406.361	-406.382		62_Pentane-AcNH2.out	-404.49	-406.361	-406.382		0.00307405	0.000144831	0.000859569		-0.00150067	-0.00142855	0.000566764		0.000374371
WEIZMANN63_Benzene-AcOH_1.00.out	-458.714	-460.684	-460.676		63_Benzene-AcOH.out	-458.714	-460.684	-460.676		0.044842	-0.00761873	0.00338985		-0.0248085	-0.0276522	0.00177813		0.00166616
WEIZMANN64_Peptide-Ethene_1.00.out	-325.188	-326.632	-326.644		64_Peptide-Ethene.out	-325.188	-326.632	-326.644		-0.027844	0.00192613	-0.00473317		0.0145539	0.0152163	-0.00298304		-0.0028972
WEIZMANN65_Pyridine-Ethyne_1.00.out	-323.651	-325.094	-325.088		65_Pyridine-Ethyne.out	-323.651	-325.094	-325.088		-0.0335438	0.00493777	-0.00650783		0.0220868	0.0163948	0.00150609		0.00171704
WEIZMANN66_MeNH2-Pyridine_1.00.out	-342.054	-343.609	-343.608		66_MeNH2-Pyridine.out	-342.054	-343.609	-343.608		0.0105684	-0.00172441	0.000903579		-0.00586909	-0.00642371	0.000427784		0.000458102
