# Supplementary material for: The S66x8 benchmark for noncovalent interactions revisited: explicitly correlated ab initio methods and density functional theory
Source: Royal Society of Chemistry journal article supplement (doi:10.1039/c6cp00688d), 2016-01-01
Supplement: c6cp00688d3.xlsx [file c6cp00688d3.xlsx]

## Sheet: VTZ-F12 F12b
		57				57
										Dimer								MonomerA								MonomerB
HF+CABS	MP2-F12	CCSD-F12b	CCSD(T*)-F12b	CCSD(T)-F12b	CCSD(Tbsc)-F12b	CCSD(T*sc)-F12b	CCSD(Ts)-F12b			HF+CABS	MP2-F12	CCSD-F12b	CCSD(T*)-F12b	MP2-F12/MP2	CCSD-F12b/CCSD	CCSD(T)-F12b		HF+CABS	MP2-F12	CCSD-F12b	CCSD(T*)-F12b	MP2-F12/MP2	CCSD-F12b/CCSD	CCSD(T)-F12b		HF+CABS	MP2-F12	CCSD-F12b	CCSD(T*)-F12b	MP2-F12/MP2	CCSD-F12b/CCSD	CCSD(T)-F12b
3.77974	4.97275	4.76516	5.00238	4.98597	5.00338	5.00704	4.9976		01_Water-Water_1.00.out	-152.138	-152.739	-152.73	-152.749	1.09544	1.07885	-152.748	01_Water-Water_1.00.out	-76.0659	-76.3654	-76.361	-76.3706	1.09582	1.07912	-76.3698	01_Water-Water_1.00.out	-76.066	-76.3655	-76.3611	-76.3707	1.09591	1.0792	-76.3698
3.85417	5.70453	5.3598	5.69561	5.67233	5.69553	5.70106	5.6888		02_Water-MeOH_1.00.out	-191.172	-191.958	-191.956	-191.983	1.09192	1.07423	-191.981	02_Water-MeOH_1.00.out	-76.0658	-76.3654	-76.361	-76.3706	1.09579	1.0791	-76.3698	02_Water-MeOH_1.00.out	-115.1	-115.584	-115.586	-115.604	1.09035	1.07188	-115.602
4.78055	7.06726	6.57239	6.9955	6.9625	6.98974	6.99683	6.98306		03_Water-MeNH2_1.00.out	-171.335	-172.09	-172.094	-172.121	1.088	1.06982	-172.119	03_Water-MeNH2_1.00.out	-76.0655	-76.3653	-76.3609	-76.3705	1.09568	1.07899	-76.3697	03_Water-MeNH2_1.00.out	-95.2618	-95.7131	-95.7223	-95.7394	1.08385	1.06458	-95.738
5.93746	8.0996	7.79782	8.23653	8.19215	8.21937	8.22603	8.21293		04_Water-Peptide_1.00.out	-323.194	-324.564	-324.555	-324.613	1.08592	1.06904	-324.608	04_Water-Peptide_1.00.out	-76.0656	-76.3653	-76.3609	-76.3706	1.09571	1.07902	-76.3697	04_Water-Peptide_1.00.out	-247.119	-248.185	-248.182	-248.229	1.08357	1.06659	-248.226
3.65764	5.8604	5.45275	5.86576	5.841	5.86876	5.87588	5.86146		05_MeOH-MeOH_1.00.out	-230.206	-231.177	-231.181	-231.216	1.08984	1.0715	-231.213	05_MeOH-MeOH_1.00.out	-115.1	-115.584	-115.586	-115.603	1.09032	1.07186	-115.602	05_MeOH-MeOH_1.00.out	-115.1	-115.584	-115.586	-115.604	1.09036	1.07188	-115.602
4.41468	7.73558	7.04953	7.65909	7.62106	7.65983	7.67049	7.65118		06_MeOH-MeNH2_1.00.out	-210.368	-211.309	-211.319	-211.355	1.0865	1.06784	-211.352	06_MeOH-MeNH2_1.00.out	-115.099	-115.583	-115.586	-115.603	1.09024	1.07179	-115.602	06_MeOH-MeNH2_1.00.out	-95.2618	-95.7131	-95.7223	-95.7394	1.08385	1.06457	-95.738
5.35335	8.23344	7.78773	8.3899	8.34554	8.38342	8.3931	8.37493		07_MeOH-Peptide_1.00.out	-362.227	-363.782	-363.78	-363.846	1.08527	1.06791	-363.841	07_MeOH-Peptide_1.00.out	-115.099	-115.583	-115.586	-115.603	1.09027	1.07182	-115.602	07_MeOH-Peptide_1.00.out	-247.119	-248.185	-248.182	-248.229	1.08355	1.06656	-248.226
3.59917	5.06442	4.80811	5.10879	5.08725	5.10799	5.11294	5.10196		08_MeOH-Water_1.00.out	-191.172	-191.957	-191.955	-191.982	1.09204	1.07432	-191.98	08_MeOH-Water_1.00.out	-115.1	-115.584	-115.586	-115.603	1.09034	1.07188	-115.602	08_MeOH-Water_1.00.out	-76.0661	-76.3655	-76.3611	-76.3707	1.09592	1.0792	-76.3698
1.11973	3.05545	2.76169	3.10681	3.08533	3.10734	3.11342	3.10238		09_MeNH2-MeOH_1.00.out	-210.364	-211.302	-211.313	-211.348	1.0868	1.068	-211.345	09_MeNH2-MeOH_1.00.out	-95.2617	-95.7131	-95.7222	-95.7393	1.08384	1.06457	-95.738	09_MeNH2-MeOH_1.00.out	-115.1	-115.584	-115.586	-115.604	1.09037	1.0719	-115.602
1.08512	4.29816	3.70622	4.22468	4.19603	4.22743	4.23679	4.22184		10_MeNH2-MeNH2_1.00.out	-190.525	-191.433	-191.45	-191.485	1.08322	1.06411	-191.483	10_MeNH2-MeNH2_1.00.out	-95.2616	-95.7131	-95.7222	-95.7393	1.08382	1.06455	-95.738	10_MeNH2-MeNH2_1.00.out	-95.2617	-95.7131	-95.7222	-95.7393	1.08384	1.06457	-95.738
1.70533	5.55771	4.84706	5.50761	5.47196	5.51296	5.52395	5.50489		11_MeNH2-Peptide_1.00.out	-342.384	-343.907	-343.912	-343.977	1.08319	1.0656	-343.972	11_MeNH2-Peptide_1.00.out	-95.2616	-95.7131	-95.7222	-95.7393	1.08382	1.06456	-95.738	11_MeNH2-Peptide_1.00.out	-247.119	-248.185	-248.182	-248.229	1.08356	1.06656	-248.226
4.68989	7.52056	6.89632	7.37941	7.34292	7.37407	7.38217	7.36645		12_MeNH2-Water_1.00.out	-171.335	-172.09	-172.094	-172.122	1.0879	1.06975	-172.119	12_MeNH2-Water_1.00.out	-95.2618	-95.7131	-95.7222	-95.7393	1.08385	1.06457	-95.738	12_MeNH2-Water_1.00.out	-76.0655	-76.3653	-76.3609	-76.3705	1.09567	1.07899	-76.3697
3.28061	6.34586	5.77505	6.30551	6.268	6.30147	6.31003	6.29398		13_Peptide-MeOH_1.00.out	-362.225	-363.779	-363.777	-363.843	1.08525	1.06789	-363.838	13_Peptide-MeOH_1.00.out	-247.119	-248.185	-248.182	-248.229	1.08354	1.06655	-248.226	13_Peptide-MeOH_1.00.out	-115.1	-115.584	-115.586	-115.604	1.09037	1.07189	-115.602
3.58703	7.71554	6.86362	7.58018	7.54236	7.58685	7.59876	7.57813		14_Peptide-MeNH2_1.00.out	-342.386	-343.911	-343.915	-343.981	1.0831	1.06555	-343.976	14_Peptide-MeNH2_1.00.out	-247.119	-248.185	-248.182	-248.229	1.08351	1.06652	-248.226	14_Peptide-MeNH2_1.00.out	-95.2617	-95.7131	-95.7222	-95.7393	1.08383	1.06456	-95.738
4.7616	8.72938	8.0256	8.77942	8.74111	8.78852	8.80062	8.77882		15_Peptide-Peptide_1.00.out	-494.245	-496.384	-496.376	-496.472	1.08317	1.06626	-496.465	15_Peptide-Peptide_1.00.out	-247.118	-248.185	-248.182	-248.229	1.08354	1.06656	-248.225	15_Peptide-Peptide_1.00.out	-247.119	-248.185	-248.182	-248.229	1.08357	1.06659	-248.226
3.52276	5.18526	4.91144	5.24038	5.20286	5.22299	5.22792	5.21822		16_Peptide-Water_1.00.out	-323.19	-324.559	-324.551	-324.608	1.086	1.06909	-324.604	16_Peptide-Water_1.00.out	-247.119	-248.185	-248.182	-248.229	1.08357	1.06658	-248.226	16_Peptide-Water_1.00.out	-76.0661	-76.3655	-76.3611	-76.3707	1.09593	1.07921	-76.3698
12.9583	17.2922	16.4271	17.5696	17.5088	17.5821	17.5978	17.5658		17_Uracil-Uracil_BP_1.00try2.out	-825.32	-828.649	-828.561	-828.731	1.08223	1.06771	-828.718	17_Uracil-Uracil_BP_1.00.out	-412.65	-414.311	-414.267	-414.351	1.08252	1.06794	-414.345	17_Uracil-Uracil_BP_1.00.out	-412.65	-414.311	-414.268	-414.352	1.08252	1.06794	-414.345
4.59688	7.07366	6.49967	7.00891	6.92495	6.95221	6.95871	6.94736		18_Water-Pyridine_1.00.out	-322.867	-324.265	-324.242	-324.314	1.07939	1.06409	-324.308	18_Water-Pyridine_1.00.out	-76.0655	-76.3653	-76.3609	-76.3705	1.09568	1.079	-76.3697	18_Water-Pyridine_1.00.out	-246.794	-247.888	-247.871	-247.932	1.07544	1.06039	-247.928
4.36054	7.69569	6.89779	7.56418	7.48098	7.51808	7.52736	7.51172		19_MeOH-Pyridine_1.00.out	-361.9	-363.484	-363.468	-363.547	1.07952	1.06361	-363.541	19_MeOH-Pyridine_1.00.out	-115.099	-115.583	-115.586	-115.603	1.09024	1.0718	-115.602	19_MeOH-Pyridine_1.00.out	-246.794	-247.888	-247.871	-247.932	1.07544	1.06039	-247.928
15.691	19.1379	18.5398	19.5168	19.4561	19.5216	19.5361	19.5044		20_AcOH-AcOH_1.00.out	-455.861	-457.682	-457.653	-457.733	1.08735	1.07144	-457.727	20_AcOH-AcOH_1.00.out	-227.918	-228.826	-228.812	-228.851	1.08778	1.07175	-228.848	20_AcOH-AcOH_1.00.out	-227.918	-228.826	-228.812	-228.851	1.08778	1.07175	-228.848
12.4447	16.2367	15.7156	16.6115	16.5582	16.6153	16.6291	16.6026		21_AcNH2-AcNH2_1.00.out	-416.17	-417.926	-417.91	-417.989	1.08424	1.06784	-417.982	21_AcNH2-AcNH2_1.00.out	-208.075	-208.95	-208.942	-208.981	1.08463	1.06814	-208.978	21_AcNH2-AcNH2_1.00.out	-208.075	-208.95	-208.942	-208.981	1.08463	1.06814	-208.978
15.8107	19.5384	18.8784	19.9113	19.8404	19.9068	19.9212	19.891		22_AcOH-Uracil_1.00try2.out	-640.593	-643.168	-643.109	-643.234	1.08405	1.06904	-643.224	22_AcOH-Uracil_1.00.out	-227.918	-228.826	-228.812	-228.851	1.08779	1.07176	-228.848	22_AcOH-Uracil_1.00.out	-412.649	-414.311	-414.267	-414.351	1.08252	1.06794	-414.345
15.3927	19.2359	18.5859	19.5791	19.5185	19.5817	19.5959	19.5677		23_AcNH2-Uracil_1.00try2.out	-620.749	-623.291	-623.239	-623.363	1.08294	1.06777	-623.354	23_AcNH2-Uracil_1.00.out	-208.075	-208.95	-208.942	-208.981	1.08463	1.06815	-208.978	23_AcNH2-Uracil_1.00.out	-412.649	-414.311	-414.267	-414.351	1.0825	1.06792	-414.345
-5.20283	5.03988	1.2589	2.74836	2.69758	2.78201	2.80399	2.7734		24_Benzene-Benzene_pi-pi_1.00_symTRY3.out	-461.582	-463.707	-463.682	-463.801	1.07397	1.05869	-463.793	24_Benzene-Benzene_pi-pi_1.00.out	-230.795	-231.85	-231.84	-231.898	1.07478	1.05924	-231.894	24_Benzene-Benzene_pi-pi_1.00.out	-230.795	-231.85	-231.84	-231.898	1.07478	1.05924	-231.894
-4.41062	6.31625	2.28137	3.81692	3.76014	3.84866	3.87055	3.83808		25_Pyridine-Pyridine_pi-pi_1.00.out	-493.58	-495.787	-495.746	-495.87	1.07466	1.05986	-495.862	25_Pyridine-Pyridine_pi-pi_1.00.out	-246.794	-247.888	-247.871	-247.932	1.07541	1.06036	-247.928	25_Pyridine-Pyridine_pi-pi_1.00.out	-246.794	-247.888	-247.871	-247.932	1.07541	1.06036	-247.928
0.0257689	11.2815	7.98446	10.0138	9.91635	10.0467	10.0746	10.0182		26_Uracil-Uracil_pi-pi_1.00.out	-825.301	-828.641	-828.549	-828.72	1.08193	1.0675	-828.707	26_Uracil-Uracil_pi-pi_1.00.out	-412.651	-414.311	-414.268	-414.352	1.08255	1.06796	-414.346	26_Uracil-Uracil_pi-pi_1.00.out	-412.651	-414.311	-414.268	-414.352	1.08255	1.06796	-414.346
-4.70097	5.74231	1.86171	3.37329	3.31963	3.40606	3.42798	3.39646		27_Benzene-Pyridine_pi-pi_1.00.out	-477.581	-479.747	-479.714	-479.836	1.07432	1.05929	-479.827	27_Benzene-Pyridine_pi-pi_1.00.out	-230.795	-231.85	-231.84	-231.898	1.07478	1.05923	-231.894	27_Benzene-Pyridine_pi-pi_1.00.out	-246.794	-247.888	-247.871	-247.932	1.07542	1.06037	-247.928
-3.73775	7.75514	3.97033	5.80116	5.71174	5.82319	5.84896	5.80352		28_Benzene-Uracil_pi-pi_1.00.out	-643.441	-646.174	-646.115	-646.26	1.07879	1.064	-646.249	28_Benzene-Uracil_pi-pi_1.00.out	-230.795	-231.85	-231.84	-231.898	1.07477	1.05923	-231.894	28_Benzene-Uracil_pi-pi_1.00.out	-412.651	-414.312	-414.269	-414.352	1.08259	1.068	-414.346
-2.289	8.81642	5.10886	6.88504	6.79449	6.90312	6.92773	6.88333		29_Pyridine-Uracil_pi-pi_1.00.out	-659.441	-662.214	-662.148	-662.295	1.07904	1.06444	-662.284	29_Pyridine-Uracil_pi-pi_1.00.out	-246.793	-247.888	-247.871	-247.932	1.0754	1.06035	-247.928	29_Pyridine-Uracil_pi-pi_1.00.out	-412.651	-414.312	-414.268	-414.352	1.08259	1.068	-414.346
-3.33139	2.42817	0.54789	1.37268	1.33266	1.37896	1.3918	1.37402		30_Benzene-Ethene_1.00.out	-308.86	-310.295	-310.294	-310.37	1.07536	1.05899	-310.365	30_Benzene-Ethene_1.00.out	-230.795	-231.85	-231.84	-231.898	1.07479	1.05925	-231.894	30_Benzene-Ethene_1.00.out	-78.0697	-78.4415	-78.4532	-78.4701	1.07928	1.05979	-78.4689
-1.23847	4.04541	2.55407	3.39007	3.35316	3.40597	3.41832	3.39527		31_Uracil-Ethene_1.00.out	-490.719	-492.76	-492.726	-492.828	1.08155	1.06609	-492.82	31_Uracil-Ethene_1.00.out	-412.652	-414.312	-414.269	-414.352	1.0826	1.068	-414.346	31_Uracil-Ethene_1.00.out	-78.0697	-78.4415	-78.4532	-78.4701	1.07924	1.05975	-78.4689
-0.280168	4.5161	3.02563	3.80083	3.7552	3.80345	3.81431	3.79365		32_Uracil-Ethyne_1.00.out	-489.505	-491.518	-491.472	-491.576	1.08102	1.06614	-491.568	32_Uracil-Ethyne_1.00.out	-412.651	-414.312	-414.269	-414.352	1.08259	1.068	-414.346	32_Uracil-Ethyne_1.00.out	-76.8536	-77.1988	-77.1988	-77.2174	1.07522	1.05868	-77.2161
-2.96107	2.91386	0.979009	1.82274	1.78139	1.8294	1.84224	1.82367		33_Pyridine-Ethene_1.00.out	-324.859	-326.335	-326.326	-326.405	1.07583	1.05984	-326.399	33_Pyridine-Ethene_1.00.out	-246.794	-247.888	-247.871	-247.932	1.07543	1.06038	-247.928	33_Pyridine-Ethene_1.00.out	-78.0697	-78.4415	-78.4532	-78.4701	1.07927	1.05978	-78.4689
-3.14964	3.96535	2.72534	3.82524	3.78246	3.84535	3.8659	3.83817		34_Pentane-Pentane_1.00.out	-392.829	-394.815	-394.87	-394.953	1.07893	1.05949	-394.947	34_Pentane-Pentane_1.00.out	-196.417	-197.404	-197.433	-197.474	1.07979	1.06016	-197.471	34_Pentane-Pentane_1.00.out	-196.417	-197.404	-197.433	-197.474	1.07979	1.06016	-197.471
									35_Neopentane-Pentane_1.00.out								35_Neopentane-Pentane_1.00.out	-196.417	-197.404	-197.433	-197.474	1.07979	1.06016	-197.471	35_Neopentane-Pentane_1.00.out	-196.417	-197.412	-197.438	-197.48	1.07864	1.05936	-197.477
-1.45921	1.74711	1.27044	1.80905	1.78915	1.81976	1.82972	1.81648		36_Neopentane-Neopentane_1.00.out	-392.832	-394.827	-394.878	-394.962	1.07821	1.05903	-394.956	36_Neopentane-Neopentane_1.00.out	-196.417	-197.412	-197.438	-197.48	1.07864	1.05936	-197.477	36_Neopentane-Neopentane_1.00.out	-196.417	-197.412	-197.438	-197.48	1.07864	1.05936	-197.477
									37_Cyclopentane-Neopentane_1.00.out								37_Cyclopentane-Neopentane_1.00.out	-195.242	-196.203	-196.222	-196.264	1.07891	1.06008	-196.261	37_Cyclopentane-Neopentane_1.00.out	-196.417	-197.412	-197.438	-197.48	1.07864	1.05936	-197.477
									38_Cyclopentane-Cyclopentane_1.00.out								38_Cyclopentane-Cyclopentane_1.00.out	-195.242	-196.203	-196.222	-196.264	1.07889	1.06008	-196.261	38_Cyclopentane-Cyclopentane_1.00.out	-195.242	-196.203	-196.222	-196.264	1.0789	1.06008	-196.261
									39_Benzene-Cyclopentane_1.00.out								39_Benzene-Cyclopentane_1.00.out	-230.795	-231.85	-231.84	-231.898	1.07478	1.05923	-231.894	39_Benzene-Cyclopentane_1.00.out	-195.242	-196.203	-196.222	-196.264	1.07889	1.06007	-196.261
									40_Benzene-Neopentane_1.00.out								40_Benzene-Neopentane_1.00.out	-230.795	-231.85	-231.84	-231.898	1.07478	1.05924	-231.894	40_Benzene-Neopentane_1.00.out	-196.417	-197.412	-197.438	-197.48	1.07863	1.05935	-197.477
									41_Uracil-Pentane_1.00.out								41_Uracil-Pentane_1.00.out	-412.652	-414.312	-414.269	-414.352	1.08259	1.06799	-414.346	41_Uracil-Pentane_1.00.out	-196.417	-197.404	-197.433	-197.474	1.07978	1.06015	-197.471
									42_Uracil-Cyclopentane_1.00.out								42_Uracil-Cyclopentane_1.00.out	-412.652	-414.312	-414.269	-414.352	1.08259	1.06799	-414.346	42_Uracil-Cyclopentane_1.00.out	-195.242	-196.203	-196.222	-196.264	1.07889	1.06007	-196.261
									43_Uracil-Neopentane_1.00.out								43_Uracil-Neopentane_1.00.out	-412.651	-414.312	-414.269	-414.352	1.08259	1.068	-414.346	43_Uracil-Neopentane_1.00.out	-196.417	-197.412	-197.438	-197.48	1.07863	1.05935	-197.477
-1.45955	2.12958	1.45569	2.00881	1.98502	2.01658	2.02689	2.01291		44_Ethene-Pentane_1.00.out	-274.484	-275.849	-275.889	-275.947	1.0791	1.05963	-275.943	44_Ethene-Pentane_1.00.out	-78.0697	-78.4415	-78.4532	-78.4701	1.07928	1.05978	-78.4689	44_Ethene-Pentane_1.00.out	-196.417	-197.404	-197.433	-197.474	1.07979	1.06016	-197.471
-1.44488	2.18294	1.25631	1.79698	1.76235	1.79247	1.80193	1.78901		45_Ethyne-Pentane_1.00.out	-273.268	-274.606	-274.634	-274.694	1.07822	1.05952	-274.69	45_Ethyne-Pentane_1.00.out	-76.8538	-77.1989	-77.1989	-77.2175	1.07527	1.05872	-77.2162	45_Ethyne-Pentane_1.00.out	-196.417	-197.404	-197.433	-197.474	1.07979	1.06016	-197.471
-2.28956	4.5144	3.21655	4.31998	4.27556	4.34213	4.36135	4.33137		46_Peptide-Pentane_1.00try2.out	-443.532	-445.597	-445.62	-445.71	1.08102	1.06286	-445.703	46_Peptide-Pentane_1.00.out	-247.119	-248.185	-248.182	-248.229	1.08359	1.06659	-248.226	46_Peptide-Pentane_1.00.out	-196.417	-197.404	-197.433	-197.474	1.07978	1.06015	-197.471
-1.71161	3.8736	2.08813	2.91733	2.89177	2.93908	2.95146	2.93412		47_Benzene-Benzene_TS_1.00.out	-461.588	-463.706	-463.683	-463.801	1.07427	1.05887	-463.793	47_Benzene-Benzene_TS_1.00.out	-230.795	-231.85	-231.84	-231.898	1.07478	1.05923	-231.894	47_Benzene-Benzene_TS_1.00.out	-230.795	-231.85	-231.84	-231.898	1.07478	1.05923	-231.894
-1.00264	4.46944	2.75044	3.56656	3.53779	3.58507	3.59683	3.57929		48_Pyridine-Pyridine_TS_1.00.out	-493.586	-495.784	-495.747	-495.87	1.07498	1.06005	-495.861	48_Pyridine-Pyridine_TS_1.00.out	-246.794	-247.888	-247.871	-247.932	1.07541	1.06036	-247.928	48_Pyridine-Pyridine_TS_1.00.out	-246.794	-247.888	-247.871	-247.932	1.07541	1.06036	-247.928
-1.14791	4.29523	2.57161	3.37876	3.35355	3.40005	3.4119	3.39476		49_Benzene-Pyridine_TS_1.00.out	-477.587	-479.745	-479.715	-479.836	1.07462	1.05946	-479.827	49_Benzene-Pyridine_TS_1.00.out	-230.795	-231.85	-231.84	-231.898	1.07477	1.05923	-231.894	49_Benzene-Pyridine_TS_1.00.out	-246.794	-247.888	-247.871	-247.932	1.07541	1.06036	-247.928
0.143827	3.54253	2.42073	2.90729	2.89056	2.91819	2.92555	2.91532		50_Benzene-Ethyne_CH-pi_1.00.out	-307.649	-309.054	-309.043	-309.12	1.07448	1.05881	-309.115	50_Benzene-Ethyne_CH-pi_1.00.out	-230.795	-231.85	-231.84	-231.898	1.07477	1.05923	-231.894	50_Benzene-Ethyne_CH-pi_1.00.out	-76.8537	-77.1988	-77.1988	-77.2175	1.07523	1.05869	-77.2162
0.561524	1.72068	1.38201	1.58253	1.57155	1.58266	1.58579	1.58154		51_Ethyne-Ethyne_TS_1.00.out	-153.708	-154.4	-154.4	-154.437	1.07511	1.05861	-154.435	51_Ethyne-Ethyne_TS_1.00.out	-76.8538	-77.1989	-77.1989	-77.2175	1.07527	1.05872	-77.2162	51_Ethyne-Ethyne_TS_1.00.out	-76.8537	-77.1988	-77.1989	-77.2175	1.07525	1.0587	-77.2162
0.835898	5.32012	4.06237	4.85525	4.77897	4.8253	4.83654	4.81674		52_Benzene-AcOH_OH-pi_1.00.out	-458.717	-460.686	-460.66	-460.759	1.08033	1.06465	-460.751	52_Benzene-AcOH_OH-pi_1.00.out	-230.795	-231.85	-231.84	-231.898	1.07476	1.05922	-231.894	52_Benzene-AcOH_OH-pi_1.00.out	-227.921	-228.828	-228.814	-228.853	1.08788	1.07183	-228.85
1.00931	4.78564	3.82798	4.50584	4.44586	4.4848	4.49463	4.47843		53_Benzene-AcNH2_NH-pi_1.00.out	-438.874	-440.808	-440.789	-440.887	1.07892	1.06302	-440.88	53_Benzene-AcNH2_NH-pi_1.00.out	-230.795	-231.85	-231.84	-231.898	1.07476	1.05922	-231.894	53_Benzene-AcNH2_NH-pi_1.00.out	-208.077	-208.951	-208.943	-208.982	1.08474	1.06822	-208.979
0.958651	3.61375	2.90982	3.40595	3.32325	3.3494	3.3559	3.34504		54_Benzene-Water_OH-pi_1.00.out	-306.863	-308.221	-308.206	-308.274	1.07896	1.06325	-308.269	54_Benzene-Water_OH-pi_1.00.out	-230.795	-231.85	-231.84	-231.898	1.07477	1.05923	-231.894	54_Benzene-Water_OH-pi_1.00.out	-76.0658	-76.3654	-76.361	-76.3706	1.09583	1.07914	-76.3698
-0.0519911	4.827	3.48668	4.30052	4.21356	4.25917	4.27098	4.25186		55_Benzene-MeOH_OH-pi_1.00.out	-345.895	-347.441	-347.432	-347.509	1.079	1.06275	-347.503	55_Benzene-MeOH_OH-pi_1.00.out	-230.795	-231.85	-231.84	-231.898	1.07477	1.05922	-231.894	55_Benzene-MeOH_OH-pi_1.00.out	-115.1	-115.584	-115.586	-115.604	1.09037	1.0719	-115.602
-1.03346	3.90337	2.53428	3.30148	3.24518	3.28811	3.29981	3.28264		56_Benzene-MeNH2_NH-pi_1.00.out	-326.055	-327.569	-327.566	-327.643	1.07685	1.0604	-327.637	56_Benzene-MeNH2_NH-pi_1.00.out	-230.795	-231.85	-231.84	-231.898	1.07477	1.05923	-231.894	56_Benzene-MeNH2_NH-pi_1.00.out	-95.2616	-95.7131	-95.7222	-95.7393	1.08383	1.06457	-95.738
-0.613917	6.31533	4.30792	5.39284	5.32393	5.38737	5.40371	5.37747		57_Benzene-Peptide_NH-pi_1.00try2.out	-477.913	-480.045	-480.029	-480.136	1.07853	1.06244	-480.128	57_Benzene-Peptide_NH-pi_1.00.out	-230.795	-231.85	-231.84	-231.898	1.07476	1.05922	-231.894	57_Benzene-Peptide_NH-pi_1.00.out	-247.119	-248.185	-248.182	-248.229	1.08358	1.06659	-248.226
1.18698	4.38329	3.6624	4.21562	4.19176	4.22361	4.23156	4.21966		58_Pyridine-Pyridine_CH-N_1.00.out	-493.589	-495.784	-495.748	-495.871	1.07518	1.06017	-495.862	58_Pyridine-Pyridine_CH-N_1.00.out	-246.793	-247.888	-247.871	-247.932	1.0754	1.06035	-247.928	58_Pyridine-Pyridine_CH-N_1.00.out	-246.793	-247.888	-247.871	-247.932	1.0754	1.06035	-247.928
2.25699	2.8906	2.77725	2.96392	2.91275	2.92195	2.92421	2.91989		59_Ethyne-Water_CH-O_1.00.out	-152.923	-153.569	-153.564	-153.593	1.08458	1.06792	-153.591	59_Ethyne-Water_CH-O_1.00.out	-76.8536	-77.1988	-77.1988	-77.2175	1.07521	1.05867	-77.2162	59_Ethyne-Water_CH-O_1.00.out	-76.0661	-76.3655	-76.3611	-76.3707	1.09593	1.07922	-76.3698
2.74164	5.11147	4.52713	5.0313	4.98072	5.01154	5.01887	5.00462		60_Ethyne-AcOH_OH-pi_1.00.out	-304.779	-306.035	-306.02	-306.078	1.08412	1.06795	-306.074	60_Ethyne-AcOH_OH-pi_1.00.out	-76.8535	-77.1988	-77.1988	-77.2174	1.07518	1.05865	-77.2161	60_Ethyne-AcOH_OH-pi_1.00.out	-227.921	-228.828	-228.814	-228.853	1.08788	1.07183	-228.85
-1.56488	3.0185	2.18141	2.94044	2.90934	2.95678	2.96984	2.9477		61_Pentane-AcOH_1.00.out	-424.335	-426.237	-426.25	-426.331	1.08311	1.06516	-426.325	61_Pentane-AcOH_1.00.out	-196.417	-197.404	-197.433	-197.474	1.07979	1.06016	-197.471	61_Pentane-AcOH_1.00.out	-227.921	-228.828	-228.814	-228.853	1.0879	1.07184	-228.85
-1.62336	3.66746	2.6889	3.58904	3.55119	3.60583	3.62146	3.59663		62_Pentane-AcNH2_1.00.out	-404.491	-406.361	-406.381	-406.461	1.08149	1.06336	-406.455	62_Pentane-AcNH2_1.00.out	-196.417	-197.404	-197.433	-197.474	1.07978	1.06015	-197.471	62_Pentane-AcNH2_1.00.out	-208.077	-208.951	-208.943	-208.982	1.08474	1.06822	-208.979
-1.17613	4.62776	2.96264	3.88274	3.80114	3.85531	3.86844	3.84533		63_Benzene-AcOH_1.00.out	-458.714	-460.685	-460.658	-460.757	1.08026	1.0646	-460.75	63_Benzene-AcOH_1.00.out	-230.795	-231.85	-231.84	-231.898	1.07477	1.05923	-231.894	63_Benzene-AcOH_1.00.out	-227.921	-228.828	-228.814	-228.853	1.08788	1.07183	-228.85
-0.304151	3.18506	2.44889	3.03349	3.00275	3.03846	3.0482	3.03194		64_Peptide-Ethene_1.00.out	-325.188	-326.632	-326.639	-326.704	1.08205	1.06446	-326.699	64_Peptide-Ethene_1.00.out	-247.119	-248.185	-248.182	-248.229	1.08359	1.06659	-248.226	64_Peptide-Ethene_1.00.out	-78.0696	-78.4415	-78.4532	-78.4701	1.07925	1.05977	-78.4689
2.57781	4.20194	3.75318	4.06864	4.05437	4.07239	4.07702	4.07024		65_Pyridine-Ethyne_1.00.out	-323.651	-325.094	-325.076	-325.156	1.07518	1.05982	-325.15	65_Pyridine-Ethyne_1.00.out	-246.794	-247.888	-247.871	-247.932	1.07543	1.06038	-247.928	65_Pyridine-Ethyne_1.00.out	-76.8534	-77.1988	-77.1987	-77.2174	1.07514	1.05861	-77.2161
-0.332548	4.57856	3.25706	4.03218	3.97294	4.01677	4.0283	4.01066		66_MeNH2-Pyridine_1.00.out	-342.055	-343.609	-343.599	-343.678	1.07734	1.06123	-343.672	66_MeNH2-Pyridine_1.00.out	-95.2616	-95.7131	-95.7222	-95.7393	1.08382	1.06456	-95.738	66_MeNH2-Pyridine_1.00.out	-246.794	-247.888	-247.871	-247.932	1.07542	1.06037	-247.928

## Sheet: VDZ-F12 F12b
						65
											Dimer								MonomerA								MonomerB
HF+CABS	MP2-F12b	CCSD-F12b	CCSD(T*)-F12b	CCSD(T)-F12b	CCSD(Tbsc)-F12b	CCSD(T*sc)-F12b	CCSD(Ts)-F12b				HF+CABS	MP2-F12	CCSD-F12b	CCSD(T*)-F12b	MP2-F12/MP2	CCSD-F12b/CCSD	CCSD(T)-F12b		HF+CABS	MP2-F12	CCSD-F12b	CCSD(T*)-F12b	MP2-F12/MP2		CCSD(T)-F12b		HF+CABS	MP2-F12	CCSD-F12b	CCSD(T*)-F12b	MP2-F12/MP2		CCSD(T)-F12b
3.81345	5.02753	4.78924	5.03875	4.99601	5.03581	5.04267	5.02523			01_Water-Water_1.00.out	-152.129	-152.723	-152.705	-152.722	1.22563	1.19246	-152.719	01_Water-Water_1.00.out	-76.0613	-76.3573	-76.3486	-76.357	1.22599		-76.3555	01_Water-Water_1.00.out	-76.0615	-76.3574	-76.3487	-76.357	1.22618		-76.3555
3.88203	5.74025	5.35612	5.70004	5.6404	5.69205	5.70245	5.68057			02_Water-MeOH_1.00.out	-191.161	-191.939	-191.926	-191.951	1.21826	1.18167	-191.946	02_Water-MeOH_1.00.out	-76.0612	-76.3573	-76.3486	-76.357	1.22593		-76.3554	02_Water-MeOH_1.00.out	-115.093	-115.573	-115.569	-115.585	1.21452		-115.582
4.82448	7.1233	6.57961	7.01136	6.93023	6.98991	7.00311	6.97977			03_Water-MeNH2_1.00.out	-171.325	-172.074	-172.068	-172.093	1.20786	1.1702	-172.089	03_Water-MeNH2_1.00.out	-76.0609	-76.3572	-76.3485	-76.3569	1.22569		-76.3553	03_Water-MeNH2_1.00.out	-95.2568	-95.705	-95.7093	-95.7248	1.19744		-95.7223
5.97461	8.12361	7.7784	8.24187	8.13945	8.2015	8.21427	8.19047			04_Water-Peptide_1.00.out	-323.176	-324.534	-324.509	-324.562	1.20721	1.17186	-324.553	04_Water-Peptide_1.00.out	-76.061	-76.3573	-76.3485	-76.3569	1.22575		-76.3554	04_Water-Peptide_1.00.out	-247.106	-248.164	-248.148	-248.192	1.20255		-248.185
3.67342	5.87736	5.44229	5.86013	5.79686	5.85899	5.87267	5.84696			05_MeOH-MeOH_1.00.out	-230.193	-231.154	-231.146	-231.178	1.2138	1.17523	-231.173	05_MeOH-MeOH_1.00.out	-115.093	-115.572	-115.569	-115.584	1.21462		-115.582	05_MeOH-MeOH_1.00.out	-115.094	-115.573	-115.569	-115.585	1.21453		-115.582
4.45153	7.77998	7.05207	7.65875	7.56598	7.65124	7.67142	7.6386			06_MeOH-MeNH2_1.00.out	-210.357	-211.29	-211.289	-211.321	1.20518	1.1659	-211.316	06_MeOH-MeNH2_1.00.out	-115.093	-115.572	-115.568	-115.584	1.2145		-115.581	06_MeOH-MeNH2_1.00.out	-95.2568	-95.705	-95.7093	-95.7248	1.19742		-95.7223
5.37536	8.23174	7.75637	8.37699	8.2701	8.35689	8.37574	8.34269			07_MeOH-Peptide_1.00.out	-362.208	-363.75	-363.729	-363.79	1.20563	1.16893	-363.78	07_MeOH-Peptide_1.00.out	-115.093	-115.572	-115.569	-115.584	1.21454		-115.582	07_MeOH-Peptide_1.00.out	-247.106	-248.164	-248.148	-248.192	1.20243		-248.185
3.62316	5.11743	4.83704	5.15695	5.10208	5.15024	5.15997	5.13953			08_MeOH-Water_1.00.out	-191.161	-191.938	-191.925	-191.95	1.21839	1.18171	-191.945	08_MeOH-Water_1.00.out	-115.093	-115.572	-115.569	-115.584	1.21466		-115.582	08_MeOH-Water_1.00.out	-76.0615	-76.3574	-76.3487	-76.357	1.22619		-76.3555
1.13468	3.07068	2.75956	3.10629	3.05443	3.10339	3.11503	3.0961			09_MeNH2-MeOH_1.00.out	-210.352	-211.282	-211.283	-211.314	1.2055	1.16604	-211.309	09_MeNH2-MeOH_1.00.out	-95.2568	-95.7049	-95.7093	-95.7248	1.19749		-95.7222	09_MeNH2-MeOH_1.00.out	-115.094	-115.573	-115.569	-115.585	1.21461		-115.582
1.11246	4.33878	3.71401	4.22359	4.155	4.22392	4.24158	4.21731			10_MeNH2-MeNH2_1.00.out	-190.515	-191.417	-191.424	-191.456	1.19634	1.1563	-191.451	10_MeNH2-MeNH2_1.00.out	-95.2567	-95.7049	-95.7092	-95.7248	1.19746		-95.7222	10_MeNH2-MeNH2_1.00.out	-95.2568	-95.705	-95.7093	-95.7248	1.19743		-95.7223
1.72966	5.56961	4.82597	5.48668	5.40469	5.49898	5.52047	5.48647			11_MeNH2-Peptide_1.00.out	-342.366	-343.878	-343.865	-343.926	1.20007	1.16293	-343.916	11_MeNH2-Peptide_1.00.out	-95.2567	-95.7049	-95.7092	-95.7248	1.19747		-95.7222	11_MeNH2-Peptide_1.00.out	-247.106	-248.164	-248.148	-248.192	1.20246		-248.185
4.73518	7.57951	6.90136	7.38882	7.29924	7.36693	7.38189	7.35546			12_MeNH2-Water_1.00.out	-171.325	-172.074	-172.069	-172.093	1.20773	1.17012	-172.089	12_MeNH2-Water_1.00.out	-95.2568	-95.705	-95.7093	-95.7248	1.19742		-95.7223	12_MeNH2-Water_1.00.out	-76.0609	-76.3572	-76.3485	-76.3569	1.22567		-76.3553
3.30305	6.36712	5.76204	6.31022	6.22504	6.30314	6.32008	6.29046			13_Peptide-MeOH_1.00.out	-362.205	-363.747	-363.727	-363.787	1.20528	1.16869	-363.777	13_Peptide-MeOH_1.00.out	-247.106	-248.164	-248.148	-248.192	1.20242		-248.185	13_Peptide-MeOH_1.00.out	-115.094	-115.573	-115.569	-115.585	1.21456		-115.582
3.63023	7.77874	6.88109	7.59718	7.50941	7.61172	7.63498	7.59819			14_Peptide-MeNH2_1.00.out	-342.369	-343.882	-343.868	-343.929	1.19985	1.16283	-343.919	14_Peptide-MeNH2_1.00.out	-247.106	-248.164	-248.148	-248.192	1.20237		-248.185	14_Peptide-MeNH2_1.00.out	-95.2568	-95.705	-95.7093	-95.7248	1.19739		-95.7223
4.79525	8.74219	8.01091	8.78974	8.69262	8.8057	8.83007	8.78894			15_Peptide-Peptide_1.00.out	-494.219	-496.342	-496.309	-496.398	1.20163	1.16588	-496.383	15_Peptide-Peptide_1.00.out	-247.106	-248.164	-248.148	-248.192	1.2025		-248.185	15_Peptide-Peptide_1.00.out	-247.106	-248.164	-248.148	-248.192	1.20252		-248.185
3.55182	5.25563	4.95033	5.32033	5.23856	5.28806	5.29824	5.27928			16_Peptide-Water_1.00.out	-323.173	-324.53	-324.505	-324.558	1.20707	1.17175	-324.549	16_Peptide-Water_1.00.out	-247.106	-248.164	-248.148	-248.192	1.20255		-248.185	16_Peptide-Water_1.00.out	-76.0615	-76.3574	-76.3487	-76.357	1.22621		-76.3555
12.9843	17.2744	16.3469	17.569	17.4037	17.5881	17.6202	17.553			17_Uracil-Uracil_BP_1.00.out	-825.278	-828.58	-828.452	-828.611	1.20485	1.17444	-828.584	17_Uracil-Uracil_BP_1.00.out	-412.628	-414.276	-414.213	-414.291	1.20546		-414.278	17_Uracil-Uracil_BP_1.00.out	-412.629	-414.276	-414.213	-414.292	1.20549		-414.278
4.62486	7.11865	6.50137	7.07857	6.91512	6.98274	6.99601	6.97358			18_Water-Pyridine_1.00.out	-322.85	-324.239	-324.202	-324.269	1.1955	1.16345	-324.258	18_Water-Pyridine_1.00.out	-76.061	-76.3573	-76.3485	-76.3569	1.2257		-76.3554	18_Water-Pyridine_1.00.out	-246.782	-247.87	-247.843	-247.9	1.18852		-247.891
4.38252	7.71384	6.88358	7.60044	7.44081	7.53089	7.54965	7.51955			19_MeOH-Pyridine_1.00.out	-361.882	-363.455	-363.422	-363.497	1.19532	1.16165	-363.485	19_MeOH-Pyridine_1.00.out	-115.093	-115.572	-115.569	-115.584	1.2145		-115.581	19_MeOH-Pyridine_1.00.out	-246.782	-247.87	-247.843	-247.9	1.18852		-247.891
15.7072	19.0555	18.3821	19.4057	19.2325	19.3859	19.4145	19.3526			20_AcOH-AcOH_1.00.out	-455.837	-457.64	-457.587	-457.661	1.21409	1.18039	-457.648	20_AcOH-AcOH_1.00.out	-227.906	-228.805	-228.779	-228.815	1.21432		-228.809	20_AcOH-AcOH_1.00.out	-227.906	-228.805	-228.779	-228.815	1.21432		-228.809
12.4591	16.1982	15.6218	16.5565	16.4141	16.5493	16.5768	16.526			21_AcNH2-AcNH2_1.00.out	-416.148	-417.89	-417.852	-417.925	1.20531	1.1707	-417.913	21_AcNH2-AcNH2_1.00.out	-208.064	-208.932	-208.914	-208.95	1.20585		-208.943	21_AcNH2-AcNH2_1.00.out	-208.064	-208.932	-208.914	-208.95	1.20585		-208.943
15.8309	19.4825	18.7533	19.8555	19.6696	19.8315	19.8604	19.7991			22_AcOH-Uracil_1.00.out	-640.559	-643.112	-643.021	-643.138	1.20817	1.1766	-643.118	22_AcOH-Uracil_1.00.out	-227.906	-228.805	-228.779	-228.815	1.21432		-228.809	22_AcOH-Uracil_1.00.out	-412.628	-414.276	-414.213	-414.291	1.20549		-414.278
15.4232	19.2035	18.4854	19.5346	19.3788	19.5336	19.5621	19.5051			23_AcNH2-Uracil_1.00.out	-620.717	-623.239	-623.155	-623.272	1.20511	1.17322	-623.252	23_AcNH2-Uracil_1.00.out	-208.064	-208.932	-208.914	-208.949	1.20586		-208.943	23_AcNH2-Uracil_1.00.out	-412.628	-414.276	-414.212	-414.291	1.20544		-414.278
-5.15489	5.07627	1.24219	2.73005	2.6064	2.813	2.85754	2.79916			24_Benzene-Benzene_pi-pi_1.00.out	-461.561	-463.673	-463.629	-463.742	1.18409	1.15144	-463.724	24_Benzene-Benzene_pi-pi_1.00.out	-230.784	-231.833	-231.814	-231.869	1.18628		-231.86	24_Benzene-Benzene_pi-pi_1.00.out	-230.784	-231.833	-231.814	-231.869	1.18628		-231.86
-4.36631	6.32744	2.23537	3.76217	3.62591	3.84162	3.8852	3.82239			25_Pyridine-Pyridine_pi-pi_1.00.out	-493.557	-495.75	-495.689	-495.807	1.18647	1.15513	-495.788	25_Pyridine-Pyridine_pi-pi_1.00.out	-246.782	-247.87	-247.843	-247.9	1.18849		-247.891	25_Pyridine-Pyridine_pi-pi_1.00.out	-246.782	-247.87	-247.843	-247.9	1.18849		-247.891
0.0928512	11.2477	7.89921	9.99335	9.75384	10.0758	10.1319	10.0159			26_Uracil-Uracil_pi-pi_1.00.out	-825.259	-828.571	-828.439	-828.6	1.20384	1.17362	-828.573	26_Uracil-Uracil_pi-pi_1.00.out	-412.63	-414.277	-414.213	-414.292	1.20553		-414.279	26_Uracil-Uracil_pi-pi_1.00.out	-412.63	-414.277	-414.213	-414.292	1.20553		-414.279
-4.65265	5.76508	1.82988	3.33604	3.20653	3.41759	3.46163	3.40106			27_Benzene-Pyridine_pi-pi_1.00.out	-477.559	-479.712	-479.659	-479.775	1.1853	1.15331	-479.757	27_Benzene-Pyridine_pi-pi_1.00.out	-230.784	-231.833	-231.814	-231.869	1.18627		-231.86	27_Benzene-Pyridine_pi-pi_1.00.out	-246.782	-247.87	-247.843	-247.9	1.18851		-247.891
-3.67643	7.76734	3.92221	5.79516	5.58043	5.85352	5.90538	5.81474			28_Benzene-Uracil_pi-pi_1.00.out	-643.409	-646.122	-646.034	-646.171	1.19596	1.16469	-646.148	28_Benzene-Uracil_pi-pi_1.00.out	-230.784	-231.833	-231.814	-231.869	1.18625		-231.86	28_Benzene-Uracil_pi-pi_1.00.out	-412.63	-414.277	-414.214	-414.292	1.20558		-414.279
-2.23912	8.79955	5.03361	6.85037	6.63553	6.90166	6.95089	6.86188			29_Pyridine-Uracil_pi-pi_1.00.out	-659.409	-662.161	-662.065	-662.204	1.19686	1.16613	-662.181	29_Pyridine-Uracil_pi-pi_1.00.out	-246.782	-247.87	-247.843	-247.9	1.18845		-247.891	29_Pyridine-Uracil_pi-pi_1.00.out	-412.63	-414.277	-414.214	-414.292	1.20557		-414.279
-3.30379	2.45687	0.551661	1.35605	1.27622	1.38493	1.41036	1.3786			30_Benzene-Ethene_1.00.out	-308.845	-310.272	-310.258	-310.331	1.18512	1.15003	-310.319	30_Benzene-Ethene_1.00.out	-230.784	-231.833	-231.814	-231.869	1.1863		-231.86	30_Benzene-Ethene_1.00.out	-78.0658	-78.4355	-78.4438	-78.4595	1.18754		-78.457
-1.21651	4.06087	2.53654	3.36583	3.2841	3.41001	3.43445	3.38973			31_Uracil-Ethene_1.00.out	-490.694	-492.719	-492.662	-492.757	1.20113	1.16843	-492.741	31_Uracil-Ethene_1.00.out	-412.63	-414.277	-414.214	-414.292	1.20559		-414.279	31_Uracil-Ethene_1.00.out	-78.0657	-78.4355	-78.4438	-78.4595	1.18747		-78.4571
-0.278338	4.4871	2.98938	3.77203	3.66337	3.77731	3.79815	3.7586			32_Uracil-Ethyne_1.00.out	-489.48	-491.478	-491.409	-491.506	1.19997	1.16905	-491.49	32_Uracil-Ethyne_1.00.out	-412.63	-414.277	-414.214	-414.292	1.2056		-414.279	32_Uracil-Ethyne_1.00.out	-76.8501	-77.1935	-77.1901	-77.2077	1.17816		-77.205
-2.93575	2.93978	0.979453	1.80165	1.72111	1.83437	1.85966	1.8259			33_Pyridine-Ethene_1.00.out	-324.843	-326.31	-326.288	-326.363	1.18682	1.15272	-326.351	33_Pyridine-Ethene_1.00.out	-246.782	-247.87	-247.843	-247.9	1.18853		-247.891	33_Pyridine-Ethene_1.00.out	-78.0658	-78.4355	-78.4438	-78.4595	1.18753		-78.4571
-3.07941	4.01091	2.76771	3.86021	3.74942	3.89247	3.93326	3.88813			34_Pentane-Pentane_1.00.out	-392.809	-394.784	-394.82	-394.897	1.18727	1.14572	-394.885	34_Pentane-Pentane_1.00.out	-196.407	-197.389	-197.408	-197.445	1.18911		-197.439	34_Pentane-Pentane_1.00.out	-196.407	-197.389	-197.408	-197.445	1.18912		-197.439
-2.08804	2.72731	1.92724	2.70135	2.62415	2.72543	2.75421	2.72262			35_Neopentane-Pentane_1.00.out	-392.811	-394.789	-394.824	-394.901	1.18663	1.14533	-394.889	35_Neopentane-Pentane_1.00.out	-196.407	-197.389	-197.408	-197.445	1.18912		-197.439	35_Neopentane-Pentane_1.00.out	-196.407	-197.396	-197.413	-197.451	1.18681		-197.445
-1.43475	1.77698	1.28946	1.83375	1.77904	1.84998	1.87006	1.84822			36_Neopentane-Neopentane_1.00.out	-392.812	-394.795	-394.828	-394.906	1.18592	1.1449	-394.894	36_Neopentane-Neopentane_1.00.out	-196.407	-197.396	-197.413	-197.451	1.18681		-197.445	36_Neopentane-Neopentane_1.00.out	-196.407	-197.396	-197.413	-197.451	1.18681		-197.445
-2.27843	2.53896	1.70778	2.47884	2.40433	2.5064	2.53459	2.50276			37_Cyclopentane-Neopentane_1.00.out	-391.637	-393.588	-393.613	-393.692	1.18699	1.14653	-393.68	37_Cyclopentane-Neopentane_1.00.out	-195.233	-196.188	-196.198	-196.237	1.18989		-196.23	37_Cyclopentane-Neopentane_1.00.out	-196.407	-197.396	-197.413	-197.451	1.18681		-197.445
-2.43976	3.18389	2.17178	3.07086	2.98103	3.10115	3.13345	3.09538			38_Cyclopentane-Cyclopentane_1.00.out	-390.462	-392.381	-392.399	-392.478	1.18835	1.14843	-392.465	38_Cyclopentane-Cyclopentane_1.00.out	-195.233	-196.188	-196.198	-196.237	1.18987		-196.23	38_Cyclopentane-Cyclopentane_1.00.out	-195.233	-196.188	-196.198	-196.237	1.18987		-196.23
-3.05974	4.73844	2.46961	3.63521	3.52281	3.68071	3.71879	3.67163			39_Benzene-Cyclopentane_1.00.out	-426.012	-428.028	-428.015	-428.111	1.18607	1.14992	-428.096	39_Benzene-Cyclopentane_1.00.out	-230.784	-231.833	-231.814	-231.869	1.18626		-231.86	39_Benzene-Cyclopentane_1.00.out	-195.233	-196.188	-196.198	-196.237	1.18987		-196.23
-2.17757	3.73479	2.06691	2.96814	2.88636	3.00781	3.03802	3.00214			40_Benzene-Neopentane_1.00.out	-427.188	-429.235	-429.23	-429.325	1.18508	1.14822	-429.31	40_Benzene-Neopentane_1.00.out	-230.784	-231.833	-231.814	-231.869	1.18627		-231.86	40_Benzene-Neopentane_1.00.out	-196.407	-197.396	-197.413	-197.451	1.1868		-197.445
-2.99419	5.54789	3.56918	4.97573	4.87506	5.08745	5.13312	5.05959			41_Uracil-Pentane_1.00.out	-609.033	-611.675	-611.627	-611.746	1.19761	1.16264	-611.726	41_Uracil-Pentane_1.00.out	-412.63	-414.277	-414.214	-414.293	1.20556		-414.279	41_Uracil-Pentane_1.00.out	-196.407	-197.389	-197.408	-197.445	1.18911		-197.439
-2.78036	4.8029	3.00095	4.26522	4.16886	4.36032	4.40024	4.33388			42_Uracil-Cyclopentane_1.00.out	-607.859	-610.473	-610.416	-610.536	1.19812	1.16394	-610.516	42_Uracil-Cyclopentane_1.00.out	-412.63	-414.277	-414.214	-414.293	1.20556		-414.279	42_Uracil-Cyclopentane_1.00.out	-195.233	-196.188	-196.198	-196.237	1.18987		-196.23
-1.65326	4.11997	2.8268	3.79192	3.74166	3.89023	3.92208	3.87093			43_Uracil-Neopentane_1.00.out	-609.035	-611.68	-611.631	-611.75	1.19721	1.1624	-611.73	43_Uracil-Neopentane_1.00.out	-412.63	-414.277	-414.214	-414.293	1.20557		-414.279	43_Uracil-Neopentane_1.00.out	-196.407	-197.396	-197.413	-197.451	1.1868		-197.445
-1.43496	2.15981	1.47571	2.02725	1.9676	2.03936	2.05982	2.0371			44_Ethene-Pentane_1.00.out	-274.471	-275.828	-275.854	-275.908	1.18749	1.14589	-275.9	44_Ethene-Pentane_1.00.out	-78.0658	-78.4355	-78.4438	-78.4595	1.18753		-78.4571	44_Ethene-Pentane_1.00.out	-196.407	-197.389	-197.408	-197.445	1.18912		-197.439
-1.43357	2.1563	1.23742	1.7667	1.68896	1.75493	1.77269	1.75276			45_Ethyne-Pentane_1.00.out	-273.255	-274.585	-274.6	-274.656	1.18543	1.14611	-274.647	45_Ethyne-Pentane_1.00.out	-76.8502	-77.1935	-77.1901	-77.2077	1.17825		-77.205	45_Ethyne-Pentane_1.00.out	-196.407	-197.389	-197.408	-197.445	1.18912		-197.439
-2.23024	4.54784	3.23643	4.33983	4.23174	4.38665	4.42517	4.37238			46_Peptide-Pentane_1.00.out	-443.51	-445.56	-445.561	-445.645	1.19434	1.15564	-445.631	46_Peptide-Pentane_1.00.out	-247.106	-248.164	-248.148	-248.192	1.20256		-248.185	46_Peptide-Pentane_1.00.out	-196.407	-197.389	-197.408	-197.445	1.18911		-197.439
-1.66997	3.93067	2.10275	2.94541	2.88145	2.99976	3.02542	2.99148			47_Benzene-Benzene_TS_1.00.out	-461.566	-463.671	-463.631	-463.742	1.18489	1.15194	-463.725	47_Benzene-Benzene_TS_1.00.out	-230.784	-231.833	-231.814	-231.869	1.18626		-231.86	47_Benzene-Benzene_TS_1.00.out	-230.784	-231.833	-231.814	-231.869	1.18626		-231.86
-0.952356	4.51055	2.74691	3.57266	3.50133	3.61877	3.64265	3.60793			48_Pyridine-Pyridine_TS_1.00.out	-493.563	-495.747	-495.69	-495.807	1.18733	1.15567	-495.788	48_Pyridine-Pyridine_TS_1.00.out	-246.782	-247.87	-247.843	-247.901	1.18848		-247.891	48_Pyridine-Pyridine_TS_1.00.out	-246.782	-247.87	-247.843	-247.9	1.18848		-247.891
-1.10491	4.34728	2.57343	3.3917	3.32716	3.44309	3.46745	3.43366			49_Benzene-Pyridine_TS_1.00.out	-477.565	-479.71	-479.661	-479.775	1.18612	1.15381	-479.757	49_Benzene-Pyridine_TS_1.00.out	-230.784	-231.833	-231.814	-231.869	1.18625		-231.86	49_Benzene-Pyridine_TS_1.00.out	-246.782	-247.87	-247.843	-247.9	1.18848		-247.891
0.178205	3.55945	2.4082	2.88131	2.8392	2.90402	2.91822	2.9001			50_Benzene-Ethyne_CH-pi_1.00.out	-307.635	-309.032	-309.008	-309.081	1.18333	1.15039	-309.07	50_Benzene-Ethyne_CH-pi_1.00.out	-230.784	-231.833	-231.814	-231.869	1.18625		-231.86	50_Benzene-Ethyne_CH-pi_1.00.out	-76.8501	-77.1935	-77.1901	-77.2077	1.17818		-77.205
0.561342	1.70639	1.36762	1.56264	1.53816	1.56292	1.56851	1.56226			51_Ethyne-Ethyne_TS_1.00.out	-153.701	-154.39	-154.382	-154.418	1.17793	1.14514	-154.413	51_Ethyne-Ethyne_TS_1.00.out	-76.8502	-77.1935	-77.1902	-77.2077	1.17826		-77.205	51_Ethyne-Ethyne_TS_1.00.out	-76.8502	-77.1935	-77.1901	-77.2077	1.17823		-77.205
0.880976	5.33039	4.03082	4.86554	4.69044	4.79914	4.82116	4.78365			52_Benzene-AcOH_OH-pi_1.00.out	-458.694	-460.648	-460.601	-460.694	1.19817	1.16478	-460.678	52_Benzene-AcOH_OH-pi_1.00.out	-230.784	-231.833	-231.814	-231.869	1.18623		-231.86	52_Benzene-AcOH_OH-pi_1.00.out	-227.908	-228.807	-228.781	-228.817	1.21448		-228.811
1.04163	4.79923	3.79709	4.50007	4.36858	4.46035	4.47965	4.44933			53_Benzene-AcNH2_NH-pi_1.00.out	-438.852	-440.773	-440.734	-440.826	1.19436	1.16058	-440.811	53_Benzene-AcNH2_NH-pi_1.00.out	-230.784	-231.833	-231.814	-231.869	1.18623		-231.86	53_Benzene-AcNH2_NH-pi_1.00.out	-208.066	-208.933	-208.915	-208.95	1.20602		-208.944
1.01356	3.66444	2.92072	3.46157	3.2955	3.3558	3.36825	3.34845			54_Benzene-Water_OH-pi_1.00.out	-306.847	-308.196	-308.167	-308.231	1.19412	1.1609	-308.221	54_Benzene-Water_OH-pi_1.00.out	-230.784	-231.833	-231.814	-231.869	1.18624		-231.86	54_Benzene-Water_OH-pi_1.00.out	-76.0613	-76.3573	-76.3486	-76.357	1.22603		-76.3554
0.00186942	4.84958	3.47264	4.309	4.13139	4.23622	4.25903	4.22447			55_Benzene-MeOH_OH-pi_1.00.out	-345.878	-347.413	-347.388	-347.46	1.19376	1.15914	-347.449	55_Benzene-MeOH_OH-pi_1.00.out	-230.784	-231.833	-231.814	-231.869	1.18624		-231.86	55_Benzene-MeOH_OH-pi_1.00.out	-115.093	-115.573	-115.569	-115.585	1.21469		-115.582
-0.990375	3.9241	2.52657	3.28058	3.17602	3.27552	3.29827	3.26779			56_Benzene-MeNH2_NH-pi_1.00.out	-326.039	-327.544	-327.527	-327.599	1.18823	1.1532	-327.587	56_Benzene-MeNH2_NH-pi_1.00.out	-230.784	-231.833	-231.814	-231.869	1.18625		-231.86	56_Benzene-MeNH2_NH-pi_1.00.out	-95.2567	-95.7049	-95.7092	-95.7248	1.19748		-95.7222
-0.550536	6.36235	4.30482	5.40996	5.25714	5.40819	5.44078	5.39171			57_Benzene-Peptide_NH-pi_1.00.out	-477.889	-480.007	-479.969	-480.07	1.19283	1.15861	-480.053	57_Benzene-Peptide_NH-pi_1.00.out	-230.784	-231.833	-231.814	-231.869	1.18623		-231.86	57_Benzene-Peptide_NH-pi_1.00.out	-247.106	-248.164	-248.148	-248.192	1.20256		-248.185
1.21183	4.41895	3.65182	4.22825	4.17895	4.26111	4.27786	4.25344			58_Pyridine-Pyridine_CH-N_1.00.out	-493.566	-495.747	-495.691	-495.808	1.18763	1.15586	-495.789	58_Pyridine-Pyridine_CH-N_1.00.out	-246.782	-247.87	-247.843	-247.9	1.18845		-247.891	58_Pyridine-Pyridine_CH-N_1.00.out	-246.782	-247.87	-247.843	-247.9	1.18845		-247.891
2.27611	2.94313	2.80412	3.05508	2.94143	2.96427	2.96883	2.96083			59_Ethyne-Water_CH-O_1.00.out	-152.915	-153.556	-153.543	-153.57	1.19954	1.16632	-153.565	59_Ethyne-Water_CH-O_1.00.out	-76.8501	-77.1935	-77.1901	-77.2077	1.17815		-77.205	59_Ethyne-Water_CH-O_1.00.out	-76.0615	-76.3574	-76.3487	-76.357	1.22622		-76.3555
2.74776	5.09021	4.50732	5.042	4.9137	4.98293	4.99657	4.97112			60_Ethyne-AcOH_OH-pi_1.00.out	-304.763	-306.008	-305.978	-306.033	1.20393	1.17037	-306.023	60_Ethyne-AcOH_OH-pi_1.00.out	-76.85	-77.1934	-77.19	-77.2076	1.17809		-77.205	60_Ethyne-AcOH_OH-pi_1.00.out	-227.908	-228.807	-228.781	-228.817	1.21448		-228.811
-1.52256	3.02679	2.18149	2.94015	2.8628	2.9729	2.999	2.95907			61_Pentane-AcOH_1.00.out	-424.313	-426.2	-426.192	-426.267	1.1999	1.16159	-426.255	61_Pentane-AcOH_1.00.out	-196.407	-197.389	-197.408	-197.445	1.18911		-197.439	61_Pentane-AcOH_1.00.out	-227.909	-228.807	-228.781	-228.817	1.21452		-228.811
-1.58481	3.68666	2.69276	3.59672	3.50284	3.63002	3.66132	3.6173			62_Pentane-AcNH2_1.00.out	-404.471	-406.327	-406.327	-406.402	1.19563	1.157	-406.389	62_Pentane-AcNH2_1.00.out	-196.407	-197.389	-197.408	-197.445	1.18911		-197.439	62_Pentane-AcNH2_1.00.out	-208.066	-208.933	-208.915	-208.95	1.20606		-208.944
-1.12818	4.62857	2.92639	3.89119	3.71182	3.84103	3.86715	3.8228			63_Benzene-AcOH_1.00.out	-458.691	-460.647	-460.599	-460.692	1.19777	1.16451	-460.677	63_Benzene-AcOH_1.00.out	-230.784	-231.833	-231.814	-231.869	1.18626		-231.86	63_Benzene-AcOH_1.00.out	-227.908	-228.807	-228.781	-228.817	1.21449		-228.811
-0.279712	3.21655	2.45368	3.05098	2.97574	3.0594	3.07892	3.0495			64_Peptide-Ethene_1.00.out	-325.172	-326.605	-326.596	-326.657	1.19765	1.16025	-326.647	64_Peptide-Ethene_1.00.out	-247.106	-248.164	-248.148	-248.192	1.20255		-248.185	64_Peptide-Ethene_1.00.out	-78.0657	-78.4355	-78.4437	-78.4595	1.18752		-78.457
2.59095	4.21236	3.73619	4.05657	4.02896	4.07384	4.08323	4.07032			65_Pyridine-Ethyne_1.00.out	-323.636	-325.07	-325.039	-325.115	1.18538	1.15332	-325.103	65_Pyridine-Ethyne_1.00.out	-246.782	-247.87	-247.843	-247.9	1.18851		-247.891	65_Pyridine-Ethyne_1.00.out	-76.8499	-77.1934	-77.19	-77.2076	1.17804		-77.205
-0.307106	4.58595	3.23209	4.0003	3.89313	3.99615	4.01867	3.98654			66_MeNH2-Pyridine_1.00.out	-342.038	-343.582	-343.557	-343.632	1.18991	1.15584	-343.62	66_MeNH2-Pyridine_1.00.out	-95.2567	-95.7049	-95.7092	-95.7248	1.19747		-95.7222	66_MeNH2-Pyridine_1.00.out	-246.782	-247.87	-247.843	-247.9	1.18849		-247.891

## Sheet: HLC comparison
					58								1.1783						1.15851	58
																									category breakdown, relative to HLC(Tb sc)/VTZ-F12
																									F12b VDZ-F12						(F12*) VDZ-F12
	0.0511389	REF	0.0521587	0.0650592	0.0430543	0.0853588		0.0456224	0.0853659	0.0500035	0.0731126	0.0367623	0.0609192	0.0646026	0.0661444	0.0715259	0.0897307	0.0508934	0.0626648	0	0.0398033	0.0132129			HLC(T*)	HLC(T)	HLC(Tb sc)	HLC(T*sc)	HLC(Ts)		HLC(T*)	HLC(T)	HLC(Tc sc)	HLC(T*sc)	HLC(Ts)	HLC(Ts adhoc)
	0.0206086	0.0521587	REF	0.0129616	0.00949895	0.0914363		0.0417889	0.136323	0.0272419	0.0301666	0.0362548	0.026577	0.0445868	0.116345	0.0305902	0.0424305	0.0254411	0.0251243	H-bonds	0.0447662	0.0180226		H-bonds	0.0344528	0.122624	0.0332575	0.0243745	0.0462093		0.0471415	0.0856982	0.0370927	0.046009	0.0294642	0.0307663
	0.0269514	0.0650592	0.0129616	REF	0.0221507	0.0970966		0.0503176	0.149095	0.0342048	0.025865	0.0463987	0.0284556	0.0484262	0.129164	0.0281906	0.033756	0.0323091	0.0263206	pi stacks	0.046021	0.00584967		pi stacks	0.0615564	0.202633	0.0246968	0.0521728	0.0255731		0.0479054	0.185402	0.0363204	0.0627083	0.0184816	0.022738
	0.0210751	0.0430543	0.00949895	0.0221507	REF	0.0866799		0.0385214	0.127282	0.0255631	0.0358279	0.0299127	0.0282996	0.045767	0.107581	0.036307	0.0503767	0.0246566	0.0287439	London	0.00975624	0.012456		London	0.0238946	0.107585	0.00774454	0.0312661	0.00755077		0.0418989	0.124158	0.0165563	0.0148121	0.0243433	0.0132084
																				mixed-influence	0.0347434	0.00876615		mixed-influence	0.0407667	0.114793	0.023669	0.0187202	0.0318581		0.0402881	0.0988333	0.0200832	0.0276701	0.0236585	0.0209738
	F12b VTZ-F12					at 1.0r_e geom	at S66 geom	F12b VDZ-F12						(F12*) VDZ-F12						VTZ-F12	VDZ-F12b	VDZ-F12c
	HLC(T*)	HLC(T)	HLC(Tb sc)	HLC(T*sc)	HLC(Ts)	Hobza S66x8	Hobza	HLC(T*)	HLC(T)	HLC(Tb sc)	HLC(T*sc)	HLC(Ts)	HLC(Ts adhoc)	HLC(T*)	HLC(T)	HLC(Tc sc)	HLC(T*sc)	HLC(Ts)	HLC(Ts adhoc)	CCSD-MP2
01_Water-Water_1.00.out	0.0296287	0.0132184	0.0306295	0.0342932	0.0248552	-0.0313502	0.056	0.0112159	-0.0315197	0.00827569	0.0151341	-0.00230278	0.0053478	0.0245888	-0.0172062	0.0235061	0.0284946	0.0114139	0.0149006	-0.207594	-0.238292	-0.219755	01_Water-Water_1.00.out
02_Water-MeOH_1.00.out	-0.0089219	-0.0321999	-0.00900107	-0.00347158	-0.0157297	-0.0847587	0.007	-0.0402093	-0.0998474	-0.0482021	-0.0377996	-0.0596785	-0.0491601	-0.0221916	-0.0804441	-0.0277096	-0.0197247	-0.0411352	-0.0363464	-0.344726	-0.384128	-0.358638	02_Water-MeOH_1.00.out
03_Water-MeNH2_1.00.out	-0.0717627	-0.104763	-0.0775251	-0.0704342	-0.0842038	-0.143048	-0.048	-0.111945	-0.193071	-0.133396	-0.120192	-0.143529	-0.130556	-0.085454	-0.164903	-0.104015	-0.0935734	-0.116414	-0.110506	-0.494875	-0.543693	-0.508074	03_Water-MeNH2_1.00.out
04_Water-Peptide_1.00.out	0.136938	0.0925516	0.119776	0.126431	0.113333	0.0500517	0.149	0.118258	0.0158461	0.0778964	0.0906592	0.0668627	0.0802216	0.145175	0.0448551	0.108381	0.118244	0.0949006	0.100998	-0.301782	-0.345206	-0.309324	04_Water-Peptide_1.00.out
05_MeOH-MeOH_1.00.out	0.00536226	-0.0193985	0.00836106	0.0154805	0.00106205	-0.0646982	0.013	-0.0172287	-0.0805042	-0.0183727	-0.00469538	-0.0304033	-0.0172842	-0.00204155	-0.063828	-0.000376724	0.0104258	-0.0147548	-0.00877641	-0.407644	-0.435075	-0.411126	05_MeOH-MeOH_1.00.out
06_MeOH-MeNH2_1.00.out	-0.0764862	-0.114524	-0.0757515	-0.0650868	-0.0844045	-0.153295	-0.061	-0.121229	-0.214	-0.128742	-0.108558	-0.141384	-0.122369	-0.0995163	-0.190299	-0.103254	-0.0869627	-0.119134	-0.110464	-0.686051	-0.72791	-0.693948	06_MeOH-MeNH2_1.00.out
07_MeOH-Peptide_1.00.out	0.156465	0.112098	0.149979	0.159662	0.141495	0.0582862	0.156	0.145253	0.0383604	0.125145	0.144001	0.11095	0.129958	0.164498	0.0598322	0.148664	0.163498	0.131065	0.139743	-0.445711	-0.47537	-0.444293	07_MeOH-Peptide_1.00.out
08_MeOH-Water_1.00.out	0.0443758	0.0228299	0.0435754	0.0485227	0.0375404	-0.0117106	0.056	0.0395141	-0.0153485	0.0328124	0.0425346	0.0221021	0.0319087	0.048998	-0.00465532	0.0445854	0.0520718	0.0320473	0.0365187	-0.256307	-0.280392	-0.264405	08_MeOH-Water_1.00.out
09_MeNH2-MeOH_1.00.out	0.051359	0.0298736	0.0518811	0.057965	0.0469294	0.013434	0.054	0.0356044	-0.0162536	0.0327072	0.044343	0.025412	0.0363224	0.035252	-0.0154431	0.0344892	0.0438868	0.0253516	0.0303214	-0.293765	-0.311127	-0.304152	09_MeNH2-MeOH_1.00.out
10_MeNH2-MeNH2_1.00.out	-0.0734803	-0.102136	-0.0707337	-0.0613744	-0.0763224	-0.118371	-0.067	-0.115194	-0.183786	-0.11486	-0.0972035	-0.121475	-0.105158	-0.111074	-0.178029	-0.107729	-0.0931638	-0.116953	-0.109513	-0.591948	-0.624774	-0.61027	10_MeNH2-MeNH2_1.00.out
11_MeNH2-Peptide_1.00.out	-0.0500982	-0.0857461	-0.0447528	-0.0337611	-0.052814	-0.0926577	-0.05	-0.0829306	-0.164917	-0.0706263	-0.0491348	-0.083144	-0.0617314	-0.0760274	-0.15597	-0.0597242	-0.0426088	-0.0759069	-0.066153	-0.710645	-0.743635	-0.72259	11_MeNH2-Peptide_1.00.out
12_MeNH2-Water_1.00.out	-0.141154	-0.177648	-0.146498	-0.138392	-0.154112	-0.223068	-0.118	-0.190696	-0.28027	-0.212583	-0.19762	-0.22405	-0.209329	-0.163768	-0.251402	-0.182386	-0.170568	-0.196418	-0.189719	-0.624246	-0.678149	-0.640534	12_MeNH2-Water_1.00.out
13_Peptide-MeOH_1.00.out	-0.0403505	-0.0778609	-0.0443946	-0.0358364	-0.0518825	-0.125902	-0.042	-0.0568987	-0.142077	-0.0639729	-0.0470328	-0.0766545	-0.0595235	-0.0338184	-0.116942	-0.037092	-0.0237931	-0.0528241	-0.0450129	-0.570809	-0.605077	-0.570709	13_Peptide-MeOH_1.00.out
14_Peptide-MeNH2_1.00.out	-0.135354	-0.173176	-0.128685	-0.116775	-0.137407	-0.215747	-0.121	-0.181562	-0.26933	-0.16702	-0.143761	-0.180548	-0.1573	-0.159431	-0.245186	-0.140576	-0.122034	-0.158113	-0.147506	-0.851912	-0.897652	-0.861409	14_Peptide-MeNH2_1.00.out
15_Peptide-Peptide_1.00.out	0.0500402	0.0117323	0.0591419	0.0712406	0.0494396	-0.0372199	0.047	0.0475484	-0.0495704	0.063512	0.0878838	0.0467555	0.0719789	0.0733757	-0.0215165	0.0942567	0.113362	0.0730045	0.0845197	-0.703776	-0.731282	-0.690455	15_Peptide-Peptide_1.00.out
16_Peptide-Water_1.00.out	0.0551203	0.0175955	0.0377293	0.0426562	0.032953	-0.0140814	0.051	0.0647017	-0.0170688	0.0324342	0.0426132	0.0236577	0.0343221	0.0806697	0.000747598	0.0513566	0.0592133	0.0406441	0.0455046	-0.273818	-0.305296	-0.281606	16_Peptide-Water_1.00.out
17_Uracil-Uracil_BP_1.00.out	0.277338	0.216607	0.289852	0.30556	0.273615	0.0229776	0.28	0.294543	0.129264	0.313617	0.345755	0.278594	0.317697	0.362606	0.201507	0.389926	0.413245	0.347558	0.365351	-0.865141	-0.927564	-0.832115	17_Uracil-Uracil_BP_1.00.out
18_Water-Pyridine_1.00.out	-0.0647499	-0.148709	-0.121452	-0.114947	-0.126296	-0.191877	-0.094	-0.0400835	-0.203533	-0.135906	-0.122645	-0.145071	-0.129762	-0.0112945	-0.171037	-0.101966	-0.0917922	-0.113762	-0.106784	-0.57399	-0.617283	-0.576381	18_Water-Pyridine_1.00.out
19_MeOH-Pyridine_1.00.out	-0.131502	-0.214704	-0.177608	-0.168328	-0.18397	-0.252913	-0.165	-0.113399	-0.273028	-0.182952	-0.164191	-0.194291	-0.173674	-0.0819972	-0.238005	-0.145876	-0.131188	-0.16073	-0.151316	-0.797897	-0.83026	-0.784892	19_MeOH-Pyridine_1.00.out
20_AcOH-AcOH_1.00.out	0.378903	0.318182	0.383645	0.398227	0.366473	0.102902	0.415	0.350187	0.176918	0.330318	0.358972	0.297076	0.328541	0.44079	0.271201	0.428148	0.449498	0.38888	0.403216	-0.598156	-0.673462	-0.561626	20_AcOH-AcOH_1.00.out
21_AcNH2-AcNH2_1.00.out	0.374802	0.321448	0.378605	0.392421	0.365849	0.152529	0.403	0.358348	0.215945	0.351192	0.37861	0.327898	0.357213	0.41761	0.278071	0.416632	0.437699	0.387934	0.401318	-0.521071	-0.57636	-0.499444	21_AcNH2-AcNH2_1.00.out
22_AcOH-Uracil_1.00.out	0.372892	0.301913	0.368328	0.382769	0.352609	0.0990266	0.382	0.373019	0.187126	0.348961	0.377893	0.316612	0.350518	0.45456	0.273113	0.438455	0.459653	0.399729	0.415155	-0.660058	-0.729267	-0.62297	22_AcOH-Uracil_1.00.out
23_AcNH2-Uracil_1.00.out	0.343268	0.282638	0.345842	0.359986	0.331787	0.0932805	0.366	0.33111	0.175325	0.330086	0.358576	0.301568	0.334625	0.410692	0.258462	0.416798	0.437887	0.382069	0.397127	-0.64998	-0.718108	-0.616319	23_AcNH2-Uracil_1.00.out
24_Benzene-Benzene_pi-pi_1.00_symTRY3.out	-2.29152	-2.3423	-2.25787	-2.23589	-2.26648	-2.19841	-1.979	-2.34622	-2.46987	-2.26327	-2.21873	-2.27711	-2.22663	-2.32518	-2.44544	-2.23435	-2.19908	-2.25635	-2.23332	-3.78098	-3.83408	-3.78367	24_Benzene-Benzene_pi-pi_1.00_symTRY3.out
25_Pyridine-Pyridine_pi-pi_1.00.out	-2.49933	-2.55611	-2.46759	-2.4457	-2.47818	-2.39743	-2.205	-2.56527	-2.70154	-2.48582	-2.44224	-2.50505	-2.45361	-2.53364	-2.66629	-2.44592	-2.41205	-2.47363	-2.45016	-4.03489	-4.09207	-4.02971	25_Pyridine-Pyridine_pi-pi_1.00.out
26_Uracil-Uracil_pi-pi_1.00.out	-1.26766	-1.36514	-1.23473	-1.20686	-1.26333	-1.26343	-1.387	-1.25437	-1.49388	-1.17188	-1.11584	-1.23182	-1.1632	-1.24838	-1.48078	-1.15184	-1.1114	-1.22472	-1.19353	-3.29702	-3.34851	-3.29296	26_Uracil-Uracil_pi-pi_1.00.out
27_Benzene-Pyridine_pi-pi_1.00.out	-2.36903	-2.42269	-2.33625	-2.31434	-2.34586	-2.27615	-2.09	-2.42903	-2.55854	-2.34749	-2.30344	-2.36402	-2.31309	-2.4028	-2.5288	-2.31322	-2.27866	-2.33806	-2.31482	-3.8806	-3.9352	-3.87869	27_Benzene-Pyridine_pi-pi_1.00.out
28_Benzene-Uracil_pi-pi_1.00.out	-1.95398	-2.04339	-1.93194	-1.90618	-1.95162	-1.88821	-1.942	-1.97218	-2.18691	-1.91382	-1.86196	-1.9526	-1.89125	-1.95803	-2.16694	-1.88803	-1.8491	-1.93776	-1.90984	-3.78481	-3.84514	-3.78889	28_Benzene-Uracil_pi-pi_1.00.out
29_Pyridine-Uracil_pi-pi_1.00.out	-1.93138	-2.02192	-1.9133	-1.88868	-1.93309	-1.86475	-1.925	-1.94918	-2.16401	-1.89789	-1.84866	-1.93766	-1.87839	-1.92907	-2.13798	-1.86619	-1.82955	-1.9166	-1.88962	-3.70756	-3.76593	-3.70476	29_Pyridine-Uracil_pi-pi_1.00.out
30_Benzene-Ethene_1.00.out	-1.05549	-1.0955	-1.04921	-1.03636	-1.05414	-0.995268	-0.961	-1.10082	-1.18065	-1.07194	-1.04651	-1.07826	-1.05146	-1.10138	-1.17896	-1.06812	-1.04761	-1.0787	-1.06649	-1.88028	-1.90521	-1.88846	30_Benzene-Ethene_1.00.out
31_Uracil-Ethene_1.00.out	-0.655341	-0.692256	-0.639444	-0.627092	-0.650144	-0.611426	-0.682	-0.695046	-0.776773	-0.650862	-0.626419	-0.671143	-0.643484	-0.693071	-0.772551	-0.643977	-0.62552	-0.669256	-0.656672	-1.49135	-1.52433	-1.50358	31_Uracil-Ethene_1.00.out
32_Uracil-Ethyne_1.00.out	-0.715278	-0.760906	-0.712653	-0.701798	-0.722458	-0.65515	-0.716	-0.715074	-0.823734	-0.709797	-0.688954	-0.7285	-0.703562	-0.725419	-0.831444	-0.715488	-0.700177	-0.738692	-0.727393	-1.49048	-1.49772	-1.48786	32_Uracil-Ethyne_1.00.out
33_Pyridine-Ethene_1.00.out	-1.09113	-1.13247	-1.08446	-1.07163	-1.09019	-1.03	-1.021	-1.13813	-1.21868	-1.10541	-1.08012	-1.11388	-1.08644	-1.1369	-1.21518	-1.09972	-1.07956	-1.1126	-1.1001	-1.93485	-1.96033	-1.94117	33_Pyridine-Ethene_1.00.out
34_Pentane-Pentane_1.00.out	-0.140106	-0.182891	-0.12	-0.0994544	-0.127181	-0.18745	-0.204	-0.150697	-0.261491	-0.118437	-0.0776472	-0.122776	-0.0864527	-0.178135	-0.286149	-0.13993	-0.105467	-0.149819	-0.133211	-1.24001	-1.24319	-1.25097	34_Pentane-Pentane_1.00.out
35_Neopentane-Pentane_1.00.out						-0.0580449	-0.071	-0.0259581	-0.103159	-0.00187764	0.0269037	-0.00468616	0.0210993	-0.047784	-0.12307	-0.0194875	0.0048007	-0.0262569	-0.0144624		-0.800062	-0.80823	35_Neopentane-Pentane_1.00.out
36_Neopentane-Neopentane_1.00.out	0.0619423	0.0420336	0.0726506	0.0826035	0.0693696	0.0399438	0.027	0.056776	0.00206648	0.073007	0.0930879	0.0712445	0.0893591	0.0392797	-0.0141076	0.0584639	0.0753871	0.0539101	0.0621965	-0.476675	-0.487516	-0.495479	36_Neopentane-Neopentane_1.00.out
37_Cyclopentane-Neopentane_1.00.out						-0.0767198	-0.088	-0.0601187	-0.134627	-0.0325614	-0.00437627	-0.0362043	-0.0104319	-0.0779555	-0.150633	-0.0462023	-0.0225646	-0.0538592	-0.0420696		-0.83118	-0.835511	37_Cyclopentane-Neopentane_1.00.out
38_Cyclopentane-Cyclopentane_1.00.out						-0.133213	-0.151	-0.113032	-0.202853	-0.0827352	-0.0504332	-0.0885052	-0.0585626	-0.131151	-0.218716	-0.0958826	-0.0689449	-0.106355	-0.0926667		-1.01211	-1.01391	38_Cyclopentane-Cyclopentane_1.00.out
39_Benzene-Cyclopentane_1.00.out						-1.04811	-1.066	-1.10323	-1.21563	-1.05773	-1.01966	-1.06681	-1.02784	-1.09407	-1.20379	-1.04212	-1.01105	-1.05743	-1.0396		-2.26883	-2.23964	39_Benzene-Cyclopentane_1.00.out
40_Benzene-Neopentane_1.00.out						-0.72318	-0.75	-0.766651	-0.848435	-0.726976	-0.696775	-0.732647	-0.702327	-0.756333	-0.836345	-0.711873	-0.687036	-0.722352	-0.708465		-1.66788	-1.64309	40_Benzene-Neopentane_1.00.out
41_Uracil-Pentane_1.00.out						-0.560604	-0.63	-0.572166	-0.672828	-0.460439	-0.414775	-0.488307	-0.439989	-0.595564	-0.693898	-0.476635	-0.440935	-0.513016	-0.49098		-1.97871	-1.97402	41_Uracil-Pentane_1.00.out
42_Uracil-Cyclopentane_1.00.out						-0.534602	-0.607	-0.537676	-0.634038	-0.442572	-0.402653	-0.469014	-0.425801	-0.555952	-0.6501	-0.454182	-0.423269	-0.488324	-0.468615		-1.80194	-1.79502	42_Uracil-Cyclopentane_1.00.out
43_Uracil-Neopentane_1.00.out						-0.310849	-0.361	-0.328051	-0.378307	-0.229734	-0.197885	-0.249038	-0.215188	-0.340287	-0.389639	-0.237626	-0.212751	-0.262901	-0.247461		-1.29317	-1.28658	43_Uracil-Neopentane_1.00.out
44_Ethene-Pentane_1.00.out	-0.120767	-0.144558	-0.112994	-0.10269	-0.116663	-0.124701	-0.158	-0.132564	-0.192215	-0.120454	-0.0999924	-0.122712	-0.104512	-0.144981	-0.203171	-0.129849	-0.112581	-0.134898	-0.126581	-0.673889	-0.684099	-0.68635	44_Ethene-Pentane_1.00.out
45_Ethyne-Pentane_1.00.out	-0.385955	-0.420591	-0.390471	-0.381008	-0.393922	-0.353227	-0.389	-0.389599	-0.467343	-0.401368	-0.383615	-0.40354	-0.386833	-0.40386	-0.479583	-0.412405	-0.397701	-0.417187	-0.409586	-0.92663	-0.918887	-0.92117	45_Ethyne-Pentane_1.00.out
46_Peptide-Pentane_1.00.out	-0.194417	-0.238844	-0.172275	-0.153046	-0.183034	-0.225567	-0.257	-0.208007	-0.316099	-0.161188	-0.122673	-0.175461	-0.138634	-0.22779	-0.33312	-0.174907	-0.143538	-0.195276	-0.178483	-1.29785	-1.31141	-1.30865	46_Peptide-Pentane_1.00.out
47_Benzene-Benzene_TS_1.00.out	-0.956269	-0.981832	-0.934522	-0.922142	-0.93948	-0.920399	-0.917	-0.985263	-1.04922	-0.930905	-0.905247	-0.939191	-0.910379	-0.958447	-1.02123	-0.899797	-0.87931	-0.91277	-0.899556	-1.78547	-1.82792	-1.78886	47_Benzene-Benzene_TS_1.00.out
48_Pyridine-Pyridine_TS_1.00.out	-0.902882	-0.931644	-0.884363	-0.872604	-0.89015	-0.883285	-0.884	-0.937891	-1.00922	-0.891779	-0.867896	-0.90262	-0.874706	-0.909215	-0.979231	-0.85874	-0.84004	-0.87424	-0.861449	-1.719	-1.76364	-1.72227	48_Pyridine-Pyridine_TS_1.00.out
49_Benzene-Pyridine_TS_1.00.out	-0.916472	-0.941682	-0.895188	-0.883332	-0.900474	-0.890705	-0.882	-0.955578	-1.02012	-0.904186	-0.879833	-0.913615	-0.885727	-0.921118	-0.984572	-0.865533	-0.846255	-0.879564	-0.866771	-1.72362	-1.77385	-1.72773	49_Benzene-Pyridine_TS_1.00.out
50_Benzene-Ethyne_CH-pi_1.00.out	-0.635241	-0.651968	-0.624337	-0.616976	-0.627208	-0.62163	-0.606	-0.678143	-0.720247	-0.655429	-0.64123	-0.659347	-0.6434	-0.648812	-0.690432	-0.623753	-0.612435	-0.630318	-0.622994	-1.1218	-1.15125	-1.11587	50_Benzene-Ethyne_CH-pi_1.00.out
51_Ethyne-Ethyne_TS_1.00.out	-0.138146	-0.149124	-0.138015	-0.134887	-0.139135	-0.134429	-0.122	-0.143745	-0.168224	-0.143471	-0.137878	-0.144126	-0.137816	-0.144002	-0.167801	-0.142566	-0.138184	-0.144282	-0.141417	-0.338662	-0.338767	-0.33425	51_Ethyne-Ethyne_TS_1.00.out
52_Benzene-AcOH_OH-pi_1.00.out	-0.464874	-0.541146	-0.494817	-0.483582	-0.503381	-0.528251	-0.524	-0.464849	-0.639943	-0.531251	-0.509229	-0.546739	-0.522333	-0.439858	-0.611161	-0.500064	-0.483073	-0.51983	-0.508703	-1.25775	-1.29956	-1.25752	52_Benzene-AcOH_OH-pi_1.00.out
53_Benzene-AcNH2_NH-pi_1.00.out	-0.2798	-0.339776	-0.300836	-0.291014	-0.307213	-0.344115	-0.317	-0.299157	-0.430653	-0.338883	-0.319579	-0.349901	-0.328756	-0.274692	-0.403426	-0.309471	-0.294354	-0.32413	-0.314469	-0.957665	-1.00214	-0.964616	53_Benzene-AcNH2_NH-pi_1.00.out
54_Benzene-Water_OH-pi_1.00.out	-0.207801	-0.290501	-0.264351	-0.257854	-0.268713	-0.26708	-0.279	-0.20287	-0.368945	-0.308642	-0.296193	-0.315988	-0.302121	-0.191519	-0.354085	-0.292461	-0.28275	-0.302159	-0.295833	-0.703933	-0.743726	-0.72157	54_Benzene-Water_OH-pi_1.00.out
55_Benzene-MeOH_OH-pi_1.00.out	-0.526486	-0.613446	-0.567835	-0.556026	-0.57514	-0.563623	-0.594	-0.540583	-0.718196	-0.613362	-0.590555	-0.625114	-0.60074	-0.527753	-0.701425	-0.594265	-0.5762	-0.610105	-0.59898	-1.34032	-1.37695	-1.34771	55_Benzene-MeOH_OH-pi_1.00.out
56_Benzene-MeNH2_NH-pi_1.00.out	-0.601889	-0.65819	-0.615252	-0.603554	-0.620726	-0.609377	-0.644	-0.643523	-0.74808	-0.648584	-0.625834	-0.656313	-0.632283	-0.634398	-0.736525	-0.634734	-0.616406	-0.646355	-0.63537	-1.36909	-1.39753	-1.37467	56_Benzene-MeNH2_NH-pi_1.00.out
57_Benzene-Peptide_NH-pi_1.00.out	-0.92249	-0.991397	-0.927958	-0.911614	-0.937853	-0.938081	-0.944	-0.952394	-1.10521	-0.954159	-0.921574	-0.970644	-0.935408	-0.922076	-1.07152	-0.91676	-0.891055	-0.939278	-0.923167	-2.00741	-2.05753	-2.0074	57_Benzene-Peptide_NH-pi_1.00.out
58_Pyridine-Pyridine_CH-N_1.00.out	-0.167676	-0.191534	-0.159682	-0.151738	-0.163637	-0.215746	-0.13	-0.190696	-0.239995	-0.157835	-0.141087	-0.165511	-0.146006	-0.152266	-0.200541	-0.116353	-0.103236	-0.127264	-0.118337	-0.720897	-0.767132	-0.719137	58_Pyridine-Pyridine_CH-N_1.00.out
59_Ethyne-Water_CH-O_1.00.out	0.0733116	0.0221478	0.0313508	0.0336082	0.0292886	-0.0169936	0.054	0.111955	-0.00169872	0.0211383	0.0256993	0.0177028	0.0227832	0.124165	0.0123464	0.0357397	0.0392102	0.0313696	0.0336872	-0.11335	-0.139006	-0.122283	59_Ethyne-Water_CH-O_1.00.out
60_Ethyne-AcOH_OH-pi_1.00.out	-0.080173	-0.130754	-0.0999329	-0.0925969	-0.10685	-0.144749	-0.063	-0.0482132	-0.17651	-0.107275	-0.0936358	-0.119089	-0.104053	-0.0518921	-0.177648	-0.107302	-0.0970305	-0.12179	-0.114985	-0.584343	-0.582888	-0.572959	60_Ethyne-AcOH_OH-pi_1.00.out
61_Pentane-AcOH_1.05.out	-0.078052	-0.109154	-0.0617217	-0.0486535	-0.0707918	-0.095148	-0.123	-0.0866466	-0.163989	-0.0538956	-0.0277939	-0.0677195	-0.0425107	-0.104824	-0.18058	-0.0682255	-0.0472483	-0.0863342	-0.0748526	-0.837089	-0.845306	-0.847569	61_Pentane-AcOH_1.05.out
62_Pentane-AcNH2_1.00.out	-0.0784245	-0.116271	-0.0616362	-0.0460066	-0.0708282	-0.0951802	-0.129	-0.0899454	-0.183822	-0.0566393	-0.0253463	-0.0693576	-0.0393846	-0.111275	-0.202768	-0.0730472	-0.0476504	-0.0907292	-0.0770798	-0.97856	-0.993901	-0.995684	62_Pentane-AcNH2_1.00.out
63_Benzene-AcOH_1.00.out	-0.745019	-0.826616	-0.772449	-0.759318	-0.782427	-0.747184	-0.809	-0.737377	-0.916754	-0.787543	-0.761422	-0.805773	-0.776712	-0.718092	-0.893424	-0.761332	-0.741189	-0.784656	-0.771405	-1.66512	-1.70218	-1.66319	63_Benzene-AcOH_1.00.out
64_Peptide-Ethene_1.00.out	-0.151567	-0.182305	-0.146603	-0.13686	-0.153116	-0.151075	-0.167	-0.165567	-0.240814	-0.157155	-0.137631	-0.167048	-0.147732	-0.166226	-0.23953	-0.154159	-0.13854	-0.167331	-0.158536	-0.736167	-0.76287	-0.750488	64_Peptide-Ethene_1.00.out
65_Pyridine-Ethyne_1.00.out	-0.133296	-0.147567	-0.129549	-0.124922	-0.131694	-0.208792	-0.103	-0.155792	-0.183402	-0.138516	-0.129131	-0.142035	-0.131203	-0.122464	-0.149873	-0.10373	-0.0963476	-0.109074	-0.104104	-0.448763	-0.476163	-0.43861	65_Pyridine-Ethyne_1.00.out
66_MeNH2-Pyridine_1.00.out	-0.546379	-0.605626	-0.561793	-0.550261	-0.567899	-0.562189	-0.586	-0.585648	-0.692817	-0.589801	-0.56728	-0.599413	-0.574954	-0.577914	-0.682298	-0.577198	-0.559311	-0.590791	-0.579643	-1.3215	-1.35386	-1.3299	66_MeNH2-Pyridine_1.00.out

## Sheet: VDZ-F12 F12c
						65
											Dimer								MonomerA								MonomerB
HF+CABS	MP2-F12	CCSD-F12c	CCSD(T*)-F12c	CCSD(T)-F12c	CCSD(Tbsc)-F12c	CCSD(T*sc)-F12c	CCSD(Ts)-F12c				HF+CABS	MP2-F12	CCSD-F12c	CCSD(T*)-F12c	MP2-F12/MP2	CCSD-F12c/CCSD	CCSD(T)-F12c		HF+CABS	MP2-F12	CCSD-F12c	CCSD(T*)-F12c	MP2-F12/MP2	CCSD-F12c/CCSD	CCSD(T)-F12c		HF+CABS	MP2-F12	CCSD-F12c	CCSD(T*)-F12c	MP2-F12/MP2	CCSD-F12c/CCSD	CCSD(T)-F12c
3.81345	5.02753	4.80778	5.05212	5.01033	5.05104	5.05603	5.03895			01_Water-Water_1.00.out	-152.129	-152.723	-152.711	-152.729	1.22563	1.201	-152.725	01_Water-Water_1.00.out	-76.0613	-76.3573	-76.3519	-76.3602	1.22599	1.20123	-76.3587	01_Water-Water_1.00.out	-76.0615	-76.3574	-76.3519	-76.3603	1.22618	1.20139	-76.3587
3.88203	5.74028	5.38164	5.71809	5.65984	5.71257	5.72056	5.69915			02_Water-MeOH_1.00.out	-191.161	-191.939	-191.934	-191.958	1.21826	1.18956	-191.954	02_Water-MeOH_1.00.out	-76.0612	-76.3573	-76.3519	-76.3602	1.22593	1.20118	-76.3587	02_Water-MeOH_1.00.out	-115.093	-115.573	-115.573	-115.589	1.21452	1.18323	-115.586
4.82448	7.12329	6.61521	7.03783	6.95838	7.01927	7.02971	7.00687			03_Water-MeNH2_1.00.out	-171.325	-172.074	-172.075	-172.099	1.20786	1.17743	-172.095	03_Water-MeNH2_1.00.out	-76.0609	-76.3572	-76.3517	-76.3601	1.22569	1.20097	-76.3586	03_Water-MeNH2_1.00.out	-95.2568	-95.705	-95.7125	-95.7279	1.19744	1.16341	-95.7254
5.97461	8.12356	7.81424	8.26874	8.16841	8.23194	8.2418	8.21846			04_Water-Peptide_1.00.out	-323.176	-324.534	-324.52	-324.573	1.20721	1.17936	-324.564	04_Water-Peptide_1.00.out	-76.061	-76.3573	-76.3518	-76.3601	1.22575	1.20102	-76.3586	04_Water-Peptide_1.00.out	-247.106	-248.164	-248.156	-248.2	1.20254	1.1738	-248.193
3.67342	5.87741	5.46628	5.87537	5.81358	5.87703	5.88784	5.86265			05_MeOH-MeOH_1.00.out	-230.193	-231.154	-231.155	-231.187	1.2138	1.1827	-231.181	05_MeOH-MeOH_1.00.out	-115.093	-115.572	-115.573	-115.589	1.21462	1.18329	-115.586	05_MeOH-MeOH_1.00.out	-115.094	-115.573	-115.573	-115.589	1.21453	1.18324	-115.586
4.45153	7.77999	7.08604	7.68047	7.58969	7.67674	7.69303	7.66086			06_MeOH-MeNH2_1.00.out	-210.357	-211.29	-211.296	-211.329	1.20518	1.17283	-211.323	06_MeOH-MeNH2_1.00.out	-115.093	-115.572	-115.573	-115.588	1.2145	1.18319	-115.586	06_MeOH-MeNH2_1.00.out	-95.2568	-95.705	-95.7124	-95.7279	1.19742	1.1634	-95.7254
5.37536	8.23173	7.78744	8.39623	8.29156	8.38039	8.39523	8.36279			07_MeOH-Peptide_1.00.out	-362.208	-363.75	-363.742	-363.802	1.20563	1.17621	-363.792	07_MeOH-Peptide_1.00.out	-115.093	-115.572	-115.573	-115.588	1.21454	1.18322	-115.586	07_MeOH-Peptide_1.00.out	-247.106	-248.164	-248.156	-248.2	1.20243	1.17365	-248.193
3.62316	5.11745	4.85304	5.16645	5.11279	5.16203	5.16952	5.1495			08_MeOH-Water_1.00.out	-191.161	-191.938	-191.933	-191.957	1.21839	1.18957	-191.953	08_MeOH-Water_1.00.out	-115.093	-115.572	-115.573	-115.589	1.21466	1.18332	-115.586	08_MeOH-Water_1.00.out	-76.0615	-76.3574	-76.352	-76.3603	1.22619	1.20139	-76.3587
1.13468	3.0707	2.76655	3.10595	3.05526	3.10519	3.11459	3.09605			09_MeNH2-MeOH_1.00.out	-210.352	-211.282	-211.29	-211.322	1.2055	1.17295	-211.316	09_MeNH2-MeOH_1.00.out	-95.2568	-95.7049	-95.7124	-95.7279	1.19749	1.16344	-95.7253	09_MeNH2-MeOH_1.00.out	-115.094	-115.573	-115.573	-115.589	1.21461	1.1833	-115.586
1.11246	4.33878	3.72851	4.22771	4.16075	4.23105	4.24562	4.22183			10_MeNH2-MeNH2_1.00.out	-190.515	-191.417	-191.431	-191.463	1.19634	1.16264	-191.457	10_MeNH2-MeNH2_1.00.out	-95.2567	-95.7049	-95.7124	-95.7279	1.19746	1.16341	-95.7253	10_MeNH2-MeNH2_1.00.out	-95.2568	-95.705	-95.7124	-95.7279	1.19743	1.1634	-95.7253
1.72966	5.56971	4.84712	5.49368	5.41374	5.50999	5.5271	5.4938			11_MeNH2-Peptide_1.00.out	-342.366	-343.878	-343.877	-343.937	1.20007	1.16986	-343.927	11_MeNH2-Peptide_1.00.out	-95.2567	-95.7049	-95.7124	-95.7278	1.19747	1.16342	-95.7253	11_MeNH2-Peptide_1.00.out	-247.106	-248.164	-248.157	-248.2	1.20246	1.17368	-248.193
4.73518	7.57949	6.93896	7.41572	7.32809	7.3971	7.40892	7.38307			12_MeNH2-Water_1.00.out	-171.325	-172.074	-172.075	-172.1	1.20773	1.17736	-172.096	12_MeNH2-Water_1.00.out	-95.2568	-95.705	-95.7124	-95.7279	1.19742	1.16339	-95.7254	12_MeNH2-Water_1.00.out	-76.0609	-76.3572	-76.3517	-76.3601	1.22567	1.20095	-76.3586
3.30306	6.3671	5.79639	6.33329	6.25016	6.33001	6.34331	6.31428			13_Peptide-MeOH_1.00.out	-362.205	-363.747	-363.739	-363.799	1.20528	1.17597	-363.789	13_Peptide-MeOH_1.00.out	-247.106	-248.164	-248.157	-248.2	1.20242	1.17365	-248.193	13_Peptide-MeOH_1.00.out	-115.094	-115.573	-115.573	-115.589	1.21456	1.18326	-115.586
3.63023	7.77889	6.91748	7.61946	7.5337	7.63831	7.65685	7.62077			14_Peptide-MeNH2_1.00.out	-342.369	-343.882	-343.88	-343.94	1.19985	1.16976	-343.93	14_Peptide-MeNH2_1.00.out	-247.106	-248.164	-248.156	-248.2	1.20237	1.1736	-248.193	14_Peptide-MeNH2_1.00.out	-95.2568	-95.705	-95.7124	-95.7279	1.19739	1.16337	-95.7254
4.79525	8.74207	8.05161	8.81544	8.72055	8.83632	8.85543	8.81507			15_Peptide-Peptide_1.00.out	-494.219	-496.342	-496.325	-496.414	1.20163	1.17307	-496.399	15_Peptide-Peptide_1.00.out	-247.106	-248.164	-248.156	-248.2	1.2025	1.17375	-248.192	15_Peptide-Peptide_1.00.out	-247.106	-248.164	-248.156	-248.2	1.20252	1.17377	-248.193
3.55182	5.25558	4.97397	5.33625	5.25633	5.30694	5.31479	5.29622			16_Peptide-Water_1.00.out	-323.173	-324.53	-324.516	-324.569	1.20707	1.17924	-324.56	16_Peptide-Water_1.00.out	-247.106	-248.164	-248.156	-248.2	1.20255	1.17379	-248.193	16_Peptide-Water_1.00.out	-76.0615	-76.3574	-76.352	-76.3603	1.22621	1.20141	-76.3587
12.9843	17.2745	16.4424	17.6371	17.476	17.6644	17.6877	17.622			17 Uracil ... Uracil (BP)	-825.278	-828.58	-828.478	-828.635	1.20485	1.18229	-828.609	17 Uracil ... Uracil (BP)	-412.628	-414.276	-414.226	-414.304	1.20546	1.18275	-414.29	17 Uracil ... Uracil (BP)	-412.629	-414.276	-414.226	-414.304	1.20549	1.18276	-414.29
4.62486	7.1186	6.54222	7.10731	6.94756	7.01663	7.02681	7.00484			18_Water-Pyridine_1.00.out	-322.85	-324.239	-324.211	-324.277	1.1955	1.1704	-324.267	18_Water-Pyridine_1.00.out	-76.061	-76.3573	-76.3518	-76.3601	1.2257	1.20098	-76.3586	18_Water-Pyridine_1.00.out	-246.782	-247.87	-247.849	-247.906	1.18852	1.16305	-247.897
4.38252	7.71383	6.92893	7.63183	7.47582	7.56795	7.58264	7.5531			19_MeOH-Pyridine_1.00.out	-361.882	-363.455	-363.433	-363.506	1.19532	1.16846	-363.494	19_MeOH-Pyridine_1.00.out	-115.093	-115.572	-115.573	-115.588	1.2145	1.18319	-115.586	19_MeOH-Pyridine_1.00.out	-246.782	-247.87	-247.849	-247.906	1.18852	1.16305	-247.897
15.7072	19.0556	18.4939	19.4964	19.3268	19.4837	19.5051	19.4444			20_AcOH-AcOH_1.00.out	-455.837	-457.64	-457.603	-457.677	1.21409	1.18845	-457.664	20_AcOH-AcOH_1.00.out	-227.906	-228.805	-228.787	-228.823	1.21432	1.18861	-228.816	20_AcOH-AcOH_1.00.out	-227.906	-228.805	-228.787	-228.823	1.21432	1.18861	-228.816
12.4591	16.1982	15.6987	16.6158	16.4762	16.6148	16.6359	16.5861			21_AcNH2-AcNH2_1.00.out	-416.148	-417.89	-417.866	-417.939	1.20531	1.17821	-417.927	21_AcNH2-AcNH2_1.00.out	-208.064	-208.932	-208.921	-208.956	1.20585	1.1786	-208.95	21_AcNH2-AcNH2_1.00.out	-208.064	-208.932	-208.921	-208.956	1.20585	1.1786	-208.95
15.8309	19.4826	18.8596	19.9371	19.7557	19.921	19.9422	19.8823			22_AcOH-Uracil_1.00.out	-640.559	-643.112	-643.042	-643.158	1.20817	1.18452	-643.138	22_AcOH-Uracil_1.00.out	-227.906	-228.805	-228.787	-228.823	1.21432	1.18861	-228.816	22_AcOH-Uracil_1.00.out	-412.628	-414.276	-414.226	-414.303	1.20549	1.18277	-414.29
15.4232	19.2035	18.5872	19.6142	19.462	19.6203	19.6414	19.5856			23_AcNH2-Uracil_1.00.out	-620.717	-623.239	-623.176	-623.291	1.20511	1.181	-623.271	23_AcNH2-Uracil_1.00.out	-208.064	-208.932	-208.921	-208.956	1.20586	1.17862	-208.95	23_AcNH2-Uracil_1.00.out	-412.628	-414.276	-414.225	-414.303	1.20544	1.18273	-414.29
-5.15488	5.07625	1.29257	2.75106	2.6308	2.84189	2.87716	2.81989			24_Benzene-Benzene_pi-pi_1.00_symTRY3.out	-461.561	-463.673	-463.641	-463.752	1.18409	1.15774	-463.735	24_Benzene-Benzene_pi-pi_1.00.out	-230.784	-231.833	-231.82	-231.874	1.18628	1.15925	-231.865	24_Benzene-Benzene_pi-pi_1.00.out	-230.784	-231.833	-231.82	-231.874	1.18628	1.15925	-231.865
-4.36631	6.32734	2.29763	3.7937	3.66105	3.88142	3.91529	3.8537			25_Pyridine-Pyridine_pi-pi_1.00.out	-493.557	-495.75	-495.702	-495.818	1.18647	1.16163	-495.8	25_Pyridine-Pyridine_pi-pi_1.00.out	-246.782	-247.87	-247.849	-247.906	1.18849	1.16301	-247.897	25_Pyridine-Pyridine_pi-pi_1.00.out	-246.782	-247.87	-247.849	-247.906	1.18849	1.16301	-247.897
0.0928504	11.2478	7.9548	9.99938	9.76698	10.0959	10.1364	10.023			26_Uracil-Uracil_pi-pi_1.00.out	-825.259	-828.571	-828.465	-828.624	1.20384	1.18152	-828.597	26_Uracil-Uracil_pi-pi_1.00.out	-412.63	-414.277	-414.226	-414.304	1.20553	1.18276	-414.291	26_Uracil-Uracil_pi-pi_1.00.out	-412.63	-414.277	-414.226	-414.304	1.20553	1.18276	-414.291
-4.65265	5.76503	1.88634	3.36223	3.23623	3.45181	3.48637	3.42697			27_Benzene-Pyridine_pi-pi_1.00.out	-477.559	-479.712	-479.671	-479.785	1.1853	1.1597	-479.768	27_Benzene-Pyridine_pi-pi_1.00.out	-230.784	-231.833	-231.819	-231.874	1.18627	1.15924	-231.865	27_Benzene-Pyridine_pi-pi_1.00.out	-246.782	-247.87	-247.849	-247.906	1.18851	1.16303	-247.897
-3.67643	7.76736	3.97846	5.80932	5.60042	5.87933	5.91826	5.8296			28_Benzene-Uracil_pi-pi_1.00.out	-643.409	-646.122	-646.053	-646.188	1.19596	1.17196	-646.166	28_Benzene-Uracil_pi-pi_1.00.out	-230.784	-231.833	-231.819	-231.874	1.18625	1.15923	-231.865	28_Benzene-Uracil_pi-pi_1.00.out	-412.63	-414.277	-414.227	-414.305	1.20558	1.18283	-414.291
-2.23912	8.79932	5.09456	6.87025	6.66134	6.93313	6.96978	6.88273			29_Pyridine-Uracil_pi-pi_1.00.out	-659.409	-662.161	-662.084	-662.221	1.19686	1.17347	-662.199	29_Pyridine-Uracil_pi-pi_1.00.out	-246.782	-247.87	-247.849	-247.906	1.18845	1.16298	-247.897	29_Pyridine-Uracil_pi-pi_1.00.out	-412.63	-414.277	-414.227	-414.305	1.20557	1.18283	-414.291
-3.30379	2.45689	0.568426	1.35551	1.27793	1.38877	1.40928	1.37819			30_Benzene-Ethene_1.00.out	-308.845	-310.272	-310.266	-310.338	1.18512	1.15621	-310.327	30_Benzene-Ethene_1.00.out	-230.784	-231.833	-231.82	-231.874	1.1863	1.15927	-231.865	30_Benzene-Ethene_1.00.out	-78.0658	-78.4355	-78.4458	-78.4615	1.18754	1.15166	-78.459
-1.21651	4.06089	2.55731	3.36782	3.28834	3.41691	3.43537	3.39163			31_Uracil-Ethene_1.00.out	-490.694	-492.719	-492.677	-492.771	1.20113	1.17588	-492.756	31_Uracil-Ethene_1.00.out	-412.63	-414.277	-414.227	-414.305	1.20559	1.18283	-414.291	31_Uracil-Ethene_1.00.out	-78.0657	-78.4355	-78.4458	-78.4615	1.18747	1.15159	-78.459
-0.278338	4.48711	2.99925	3.76169	3.65567	3.77162	3.78693	3.74842			32_Uracil-Ethyne_1.00.out	-489.48	-491.478	-491.424	-491.52	1.19997	1.17665	-491.504	32_Uracil-Ethyne_1.00.out	-412.63	-414.277	-414.227	-414.305	1.2056	1.18283	-414.291	32_Uracil-Ethyne_1.00.out	-76.8501	-77.1935	-77.192	-77.2094	1.17816	1.15173	-77.2068
-2.93575	2.9397	0.998532	1.8028	1.72452	1.83999	1.86015	1.8271			33_Pyridine-Ethene_1.00.out	-324.843	-326.31	-326.296	-326.37	1.18682	1.15905	-326.359	33_Pyridine-Ethene_1.00.out	-246.782	-247.87	-247.849	-247.906	1.18853	1.16304	-247.897	33_Pyridine-Ethene_1.00.out	-78.0658	-78.4355	-78.4458	-78.4615	1.18753	1.15165	-78.459
-3.07941	4.01091	2.75994	3.83278	3.72477	3.87098	3.90545	3.8611			34_Pentane-Pentane_1.00.out	-392.809	-394.784	-394.832	-394.909	1.18727	1.15155	-394.897	34_Pentane-Pentane_1.00.out	-196.407	-197.389	-197.414	-197.451	1.18911	1.15306	-197.445	34_Pentane-Pentane_1.00.out	-196.407	-197.389	-197.414	-197.451	1.18912	1.15306	-197.445
-2.08803	2.72732	1.91909	2.67953	2.60425	2.70783	2.73212	2.70106			35_Neopentane-Pentane_1.00.out	-392.811	-394.789	-394.836	-394.913	1.18663	1.15118	-394.901	35_Neopentane-Pentane_1.00.out	-196.407	-197.389	-197.414	-197.451	1.18912	1.15306	-197.445	35_Neopentane-Pentane_1.00.out	-196.407	-197.396	-197.419	-197.457	1.18681	1.15151	-197.451
-1.43475	1.77698	1.2815	1.81626	1.76287	1.83544	1.85236	1.83089			36_Neopentane-Neopentane_1.00.out	-392.812	-394.795	-394.84	-394.918	1.18592	1.15076	-394.905	36_Neopentane-Neopentane_1.00.out	-196.407	-197.396	-197.419	-197.457	1.18681	1.15151	-197.451	36_Neopentane-Neopentane_1.00.out	-196.407	-197.396	-197.419	-197.457	1.18681	1.15151	-197.451
-2.27843	2.53895	1.70344	2.46099	2.38832	2.49275	2.51638	2.48509			37_Cyclopentane-Neopentane_1.00.out	-391.637	-393.588	-393.625	-393.704	1.18699	1.15248	-393.691	37_Cyclopentane-Neopentane_1.00.out	-195.233	-196.188	-196.204	-196.242	1.18989	1.15575	-196.236	37_Cyclopentane-Neopentane_1.00.out	-196.407	-197.396	-197.419	-197.457	1.18681	1.15151	-197.451
-2.43976	3.18388	2.16997	3.05273	2.96516	3.08799	3.11493	3.07752			38_Cyclopentane-Cyclopentane_1.00.out	-390.462	-392.381	-392.411	-392.489	1.18835	1.15447	-392.477	38_Cyclopentane-Cyclopentane_1.00.out	-195.233	-196.188	-196.204	-196.242	1.18987	1.15573	-196.236	38_Cyclopentane-Cyclopentane_1.00.out	-195.233	-196.188	-196.204	-196.242	1.18987	1.15573	-196.236
-3.05974	4.73843	2.49879	3.64436	3.53464	3.69631	3.72738	3.681			39_Benzene-Cyclopentane_1.00.out	-426.012	-428.028	-428.027	-428.122	1.18607	1.15608	-428.107	39_Benzene-Cyclopentane_1.00.out	-230.784	-231.833	-231.819	-231.874	1.18626	1.15924	-231.865	39_Benzene-Cyclopentane_1.00.out	-195.233	-196.188	-196.204	-196.242	1.18987	1.15573	-196.236
-2.17757	3.73479	2.0917	2.97846	2.89844	3.02292	3.04775	3.01244			40_Benzene-Neopentane_1.00.out	-427.188	-429.235	-429.242	-429.336	1.18508	1.15429	-429.321	40_Benzene-Neopentane_1.00.out	-230.784	-231.833	-231.819	-231.874	1.18627	1.15924	-231.865	40_Benzene-Neopentane_1.00.out	-196.407	-197.396	-197.419	-197.457	1.1868	1.1515	-197.451
-2.99419	5.54794	3.57392	4.95238	4.85404	5.0713	5.107	5.03492			41_Uracil-Pentane_1.00.out	-609.033	-611.675	-611.646	-611.764	1.19761	1.16972	-611.744	41_Uracil-Pentane_1.00.out	-412.63	-414.277	-414.227	-414.305	1.20556	1.18281	-414.291	41_Uracil-Pentane_1.00.out	-196.407	-197.389	-197.414	-197.451	1.18911	1.15305	-197.445
-2.78036	4.80293	3.00791	4.24697	4.15282	4.34874	4.37966	4.3146			42_Uracil-Cyclopentane_1.00.out	-607.859	-610.473	-610.435	-610.554	1.19812	1.17112	-610.534	42_Uracil-Cyclopentane_1.00.out	-412.63	-414.277	-414.227	-414.305	1.20556	1.18281	-414.291	42_Uracil-Cyclopentane_1.00.out	-195.233	-196.188	-196.204	-196.242	1.18987	1.15572	-196.236
-1.65326	4.11999	2.83341	3.7797	3.73035	3.88236	3.90724	3.85709			43_Uracil-Neopentane_1.00.out	-609.035	-611.68	-611.65	-611.768	1.19721	1.16948	-611.749	43_Uracil-Neopentane_1.00.out	-412.63	-414.277	-414.227	-414.305	1.20557	1.18282	-414.291	43_Uracil-Neopentane_1.00.out	-196.407	-197.396	-197.419	-197.457	1.1868	1.1515	-197.451
-1.43496	2.15982	1.47347	2.01484	1.95665	2.02997	2.04724	2.02492			44_Ethene-Pentane_1.00.out	-274.471	-275.828	-275.862	-275.916	1.18749	1.15175	-275.907	44_Ethene-Pentane_1.00.out	-78.0658	-78.4355	-78.4458	-78.4615	1.18753	1.15165	-78.459	44_Ethene-Pentane_1.00.out	-196.407	-197.389	-197.414	-197.451	1.18912	1.15303	-197.445
-1.43357	2.15631	1.23514	1.75245	1.67673	1.74391	1.75861	1.73912			45_Ethyne-Pentane_1.00.out	-273.255	-274.585	-274.608	-274.663	1.18543	1.15213	-274.655	45_Ethyne-Pentane_1.00.out	-76.8502	-77.1935	-77.1921	-77.2095	1.17825	1.15181	-77.2068	45_Ethyne-Pentane_1.00.out	-196.407	-197.389	-197.414	-197.451	1.18912	1.15306	-197.445
-2.23024	4.54779	3.23914	4.32001	4.21468	4.37289	4.40426	4.35252			46_Peptide-Pentane_1.00.out	-443.51	-445.56	-445.575	-445.658	1.19434	1.16218	-445.645	46_Peptide-Pentane_1.00.out	-247.106	-248.164	-248.156	-248.2	1.20256	1.17379	-248.193	46_Peptide-Pentane_1.00.out	-196.407	-197.389	-197.414	-197.451	1.18911	1.15305	-197.445
-1.66997	3.93068	2.14183	2.97224	2.90945	3.03089	3.05137	3.01791			47_Benzene-Benzene_TS_1.00.out	-461.566	-463.671	-463.642	-463.753	1.18489	1.1582	-463.736	47_Benzene-Benzene_TS_1.00.out	-230.784	-231.833	-231.819	-231.874	1.18626	1.15924	-231.865	47_Benzene-Benzene_TS_1.00.out	-230.784	-231.833	-231.819	-231.874	1.18626	1.15924	-231.865
-0.952355	4.51041	2.78814	3.6012	3.53118	3.65167	3.67037	3.63617			48_Pyridine-Pyridine_TS_1.00.out	-493.563	-495.747	-495.702	-495.818	1.18733	1.16216	-495.799	48_Pyridine-Pyridine_TS_1.00.out	-246.782	-247.87	-247.849	-247.906	1.18848	1.163	-247.897	48_Pyridine-Pyridine_TS_1.00.out	-246.782	-247.87	-247.849	-247.906	1.18848	1.16298	-247.897
-1.10491	4.34723	2.6195	3.42611	3.36266	3.4817	3.50097	3.46766			49_Benzene-Pyridine_TS_1.00.out	-477.565	-479.71	-479.673	-479.785	1.18612	1.16018	-479.768	49_Benzene-Pyridine_TS_1.00.out	-230.784	-231.833	-231.819	-231.874	1.18625	1.15923	-231.865	49_Benzene-Pyridine_TS_1.00.out	-246.782	-247.87	-247.849	-247.906	1.18848	1.16301	-247.897
0.178205	3.55947	2.4436	2.91066	2.86904	2.93572	2.94703	2.92915			50_Benzene-Ethyne_CH-pi_1.00.out	-307.635	-309.032	-309.015	-309.088	1.18333	1.15673	-309.077	50_Benzene-Ethyne_CH-pi_1.00.out	-230.784	-231.833	-231.819	-231.874	1.18625	1.15923	-231.865	50_Benzene-Ethyne_CH-pi_1.00.out	-76.8501	-77.1935	-77.192	-77.2094	1.17818	1.15175	-77.2068
0.561342	1.70638	1.37213	1.56238	1.53858	1.56382	1.5682	1.5621			51_Ethyne-Ethyne_TS_1.00.out	-153.701	-154.39	-154.386	-154.421	1.17793	1.15161	-154.416	51_Ethyne-Ethyne_TS_1.00.out	-76.8502	-77.1935	-77.1921	-77.2095	1.17826	1.15182	-77.2068	51_Ethyne-Ethyne_TS_1.00.out	-76.8502	-77.1935	-77.1921	-77.2095	1.17823	1.15179	-77.2068
0.880978	5.33041	4.07289	4.89055	4.71925	4.83035	4.84734	4.81058			52_Benzene-AcOH_OH-pi_1.00.out	-458.694	-460.648	-460.615	-460.707	1.19817	1.17188	-460.691	52_Benzene-AcOH_OH-pi_1.00.out	-230.784	-231.833	-231.819	-231.874	1.18623	1.15921	-231.865	52_Benzene-AcOH_OH-pi_1.00.out	-227.908	-228.807	-228.789	-228.825	1.21448	1.18873	-228.818
1.04164	4.79925	3.83464	4.52456	4.39583	4.48978	4.5049	4.47512			53_Benzene-AcNH2_NH-pi_1.00.out	-438.852	-440.773	-440.747	-440.838	1.19436	1.16742	-440.823	53_Benzene-AcNH2_NH-pi_1.00.out	-230.784	-231.833	-231.819	-231.874	1.18623	1.15921	-231.865	53_Benzene-AcNH2_NH-pi_1.00.out	-208.066	-208.933	-208.922	-208.957	1.20602	1.17872	-208.951
1.01356	3.66443	2.94286	3.47291	3.31034	3.37197	3.38168	3.36227			54_Benzene-Water_OH-pi_1.00.out	-306.847	-308.196	-308.176	-308.24	1.19412	1.16769	-308.229	54_Benzene-Water_OH-pi_1.00.out	-230.784	-231.833	-231.819	-231.874	1.18624	1.15922	-231.865	54_Benzene-Water_OH-pi_1.00.out	-76.0613	-76.3573	-76.3519	-76.3602	1.22603	1.20127	-76.3587
0.00187037	4.84959	3.50188	4.32183	4.14816	4.25532	4.27339	4.23948			55_Benzene-MeOH_OH-pi_1.00.out	-345.878	-347.413	-347.398	-347.47	1.19376	1.16581	-347.458	55_Benzene-MeOH_OH-pi_1.00.out	-230.784	-231.833	-231.819	-231.874	1.18624	1.15922	-231.865	55_Benzene-MeOH_OH-pi_1.00.out	-115.093	-115.573	-115.573	-115.589	1.21469	1.18335	-115.586
-0.990373	3.92409	2.54942	3.28969	3.18757	3.28936	3.30769	3.27774			56_Benzene-MeNH2_NH-pi_1.00.out	-326.039	-327.544	-327.536	-327.607	1.18823	1.15951	-327.596	56_Benzene-MeNH2_NH-pi_1.00.out	-230.784	-231.833	-231.819	-231.874	1.18625	1.15923	-231.865	56_Benzene-MeNH2_NH-pi_1.00.out	-95.2567	-95.7049	-95.7124	-95.7279	1.19748	1.16344	-95.7253
-0.550535	6.36231	4.35491	5.44023	5.29079	5.44555	5.47125	5.42303			57_Benzene-Peptide_NH-pi_1.00.out	-477.889	-480.007	-479.983	-480.083	1.19283	1.16536	-480.067	57_Benzene-Peptide_NH-pi_1.00.out	-230.784	-231.833	-231.819	-231.874	1.18623	1.15921	-231.865	57_Benzene-Peptide_NH-pi_1.00.out	-247.106	-248.164	-248.156	-248.2	1.20256	1.17379	-248.193
1.21183	4.41892	3.69979	4.26666	4.21838	4.30257	4.31569	4.29166			58_Pyridine-Pyridine_CH-N_1.00.out	-493.566	-495.747	-495.704	-495.819	1.18763	1.16234	-495.8	58_Pyridine-Pyridine_CH-N_1.00.out	-246.782	-247.87	-247.849	-247.906	1.18845	1.16298	-247.897	58_Pyridine-Pyridine_CH-N_1.00.out	-246.782	-247.87	-247.849	-247.906	1.18845	1.16298	-247.897
2.27611	2.94312	2.82084	3.06729	2.95547	2.97886	2.98233	2.97449			59_Ethyne-Water_CH-O_1.00.out	-152.915	-153.556	-153.548	-153.575	1.19954	1.17376	-153.57	59_Ethyne-Water_CH-O_1.00.out	-76.8501	-77.1935	-77.192	-77.2094	1.17815	1.15172	-77.2068	59_Ethyne-Water_CH-O_1.00.out	-76.0615	-76.3574	-76.352	-76.3603	1.22622	1.20142	-76.3587
2.74776	5.0902	4.51724	5.03831	4.91256	4.9829	4.99317	4.96841			60_Ethyne-AcOH_OH-pi_1.00.out	-304.763	-306.008	-305.988	-306.042	1.20393	1.17795	-306.033	60_Ethyne-AcOH_OH-pi_1.00.out	-76.85	-77.1934	-77.192	-77.2094	1.17809	1.15167	-77.2067	60_Ethyne-AcOH_OH-pi_1.00.out	-227.908	-228.807	-228.789	-228.825	1.21448	1.18873	-228.818
-1.52256	3.02692	2.17935	2.92209	2.84634	2.95869	2.97967	2.94058			61_Pentane-AcOH_1.05.out	-424.313	-426.2	-426.206	-426.281	1.1999	1.16845	-426.268	61_Pentane-AcOH_1.05.out	-196.407	-197.389	-197.414	-197.451	1.18911	1.15306	-197.445	61_Pentane-AcOH_1.00.out	-227.909	-228.807	-228.789	-228.825	1.21452	1.18876	-228.818
-1.58481	3.6868	2.69111	3.57552	3.48403	3.61375	3.63915	3.59607			62_Pentane-AcNH2_1.00.out	-404.471	-406.327	-406.34	-406.414	1.19563	1.1636	-406.402	62_Pentane-AcNH2_1.00.out	-196.407	-197.389	-197.414	-197.451	1.18911	1.15305	-197.445	62_Pentane-AcNH2_1.00.out	-208.066	-208.933	-208.922	-208.957	1.20606	1.17873	-208.951
-1.12817	4.62859	2.9654	3.9105	3.73517	3.86726	3.8874	3.84394			63_Benzene-AcOH_1.00.out	-458.691	-460.647	-460.613	-460.705	1.19777	1.1716	-460.69	63_Benzene-AcOH_1.00.out	-230.784	-231.833	-231.819	-231.874	1.18626	1.15923	-231.865	63_Benzene-AcOH_1.00.out	-227.908	-228.807	-228.789	-228.825	1.21449	1.18874	-228.818
-0.27971	3.21658	2.4661	3.05036	2.97705	3.06242	3.07804	3.04925			64_Peptide-Ethene_1.00.out	-325.172	-326.605	-326.606	-326.666	1.19765	1.16708	-326.656	64_Peptide-Ethene_1.00.out	-247.106	-248.164	-248.156	-248.2	1.20255	1.17377	-248.193	64_Peptide-Ethene_1.00.out	-78.0657	-78.4355	-78.4458	-78.4615	1.18752	1.15165	-78.459
2.59095	4.21229	3.77368	4.08983	4.06242	4.10856	4.11595	4.10322			65_Pyridine-Ethyne_1.00.out	-323.636	-325.07	-325.047	-325.122	1.18538	1.15981	-325.11	65_Pyridine-Ethyne_1.00.out	-246.782	-247.87	-247.849	-247.906	1.18851	1.16304	-247.897	65_Pyridine-Ethyne_1.00.out	-76.8499	-77.1934	-77.1919	-77.2094	1.17804	1.15162	-77.2067
-0.307106	4.58589	3.25599	4.00797	3.90359	4.00869	4.02657	3.99509			66_MeNH2-Pyridine_1.00.out	-342.038	-343.582	-343.567	-343.64	1.18991	1.16229	-343.628	66_MeNH2-Pyridine_1.00.out	-95.2567	-95.7049	-95.7124	-95.7279	1.19747	1.16342	-95.7253	66_MeNH2-Pyridine_1.00.out	-246.782	-247.87	-247.849	-247.906	1.18849	1.16302	-247.897

## Sheet: Hobza's data at different geom
			(aDZ) CP	(haD->TZ) CP	(haTZ) CP		Caveat lector: these are at the S66 geometries, which subtly differ from the 1.0r_e slice of S66x8 !!!
			S66 old	S66 new
ï»¿system name	optimization level	CCSD /CBS CP	CCSD(T) /CBS(aDZ) CP	CCSD(T) /CBS(haD->TZ) CP	CCSD(T) /CBS(haTZ) CP	DW-MP2 /CBS CP	MP2 /aug-cc-pVDZ CP	MP2 /CBS CP	MP2 /cc-pVTZ CP	MP2.5 /CBS CP	MP2C /CBS CP	MP3 /CBS CP	SCS-CCSD /CBS CP	SCS-MI-CCSD /CBS CP	SCS-MI-MP2 /CBS CP	SCS-MP2 /CBS CP
01 Water ... Water	MP2/cc-pVTZ CP	-4.751	-4.918	-5.011	-4.966	-4.955	-4.386	-4.955	-4.466	-4.926	-4.965	-4.898	-4.791	-4.938	-4.906	-4.508
02 Water ... MeOH	MP2/cc-pVTZ CP	-5.351	-5.592	-5.701	-5.653	-5.694	-5.016	-5.694	-4.849	-5.593	-5.678	-5.493	-5.468	-5.631	-5.53	-5.095
03 Water ... MeNH2	MP2/cc-pVTZ CP	-6.595	-6.908	-7.036	-6.984	-7.084	-6.306	-7.084	-6.024	-6.923	-7.152	-6.762	-6.752	-6.935	-6.822	-6.391
04 Water ... Peptide	MP2/cc-pVTZ CP	-7.802	-8.103	-8.22	-8.169	-8.071	-7.076	-8.071	-6.843	-8.063	-8.004	-8.055	-7.9	-8.163	-8.003	-7.26
05 MeOH ... MeOH	MP2/cc-pVTZ CP	-5.449	-5.757	-5.851	-5.811	-5.837	-5.16	-5.838	-5.122	-5.732	-5.826	-5.625	-5.622	-5.793	-5.637	-5.15
06 MeOH ... MeNH2	MP2/cc-pVTZ CP	-7.087	-7.554	-7.666	-7.619	-7.721	-6.869	-7.727	-6.862	-7.527	-7.808	-7.327	-7.386	-7.594	-7.33	-6.779
07 MeOH ... Peptide	MP2/cc-pVTZ CP	-7.789	-8.23	-8.337	-8.292	-8.18	-7.183	-8.181	-7.168	-8.146	-8.145	-8.11	-7.984	-8.268	-8.029	-7.195
08 MeOH ... Water	MP2/cc-pVTZ CP	-4.792	-5.009	-5.087	-5.052	-5.031	-4.463	-5.031	-4.66	-4.998	-5.045	-4.965	-4.876	-5.028	-4.954	-4.516
09 MeNH2 ... MeOH	MP2/cc-pVTZ CP	-2.777	-3.059	-3.113	-3.085	-2.988	-2.637	-3.059	-2.547	-2.987	-3.08	-2.914	-3.018	-3.109	-2.78	-2.505
10 MeNH2 ... MeNH2	MP2/cc-pVTZ CP	-3.75	-4.16	-4.223	-4.193	-4.119	-3.647	-4.29	-3.646	-4.108	-4.331	-3.926	-4.137	-4.25	-3.798	-3.472
11 MeNH2 ... Peptide	MP2/cc-pVTZ CP	-4.891	-5.419	-5.48	-5.451	-5.364	-4.741	-5.53	-4.634	-5.318	-5.41	-5.106	-5.327	-5.51	-5.038	-4.454
12 MeNH2 ... Water	MP2/cc-pVTZ CP	-6.916	-7.266	-7.402	-7.347	-7.518	-6.646	-7.52	-6.461	-7.303	-7.526	-7.085	-7.131	-7.323	-7.176	-6.704
13 Peptide ... MeOH	MP2/cc-pVTZ CP	-5.778	-6.187	-6.282	-6.242	-6.31	-5.607	-6.324	-5.622	-6.153	-6.292	-5.982	-6.089	-6.257	-5.958	-5.459
14 Peptide ... MeNH2	MP2/cc-pVTZ CP	-6.889	-7.454	-7.561	-7.517	-7.648	-6.892	-7.682	-6.995	-7.409	-7.738	-7.137	-7.323	-7.505	-7.113	-6.614
15 Peptide ... Peptide	MP2/cc-pVTZ CP	-8.03	-8.63	-8.721	-8.681	-8.663	-7.758	-8.674	-7.64	-8.517	-8.579	-8.36	-8.418	-8.669	-8.266	-7.51
16 Peptide ... Water	MP2/cc-pVTZ CP	-4.886	-5.124	-5.199	-5.167	-5.147	-4.63	-5.148	-4.856	-5.11	-5.167	-5.072	-5.02	-5.158	-5.016	-4.61
17 Uracil ... Uracil (BP)	MP2/cc-pVTZ CP	-16.288	-17.182	-17.448	-17.356	-17.168	-15.396	-17.168	-15.559	-17.106	-16.981	-17.045	-16.327	-17.06	-17.406	-15.281
18 Water ... Pyridine	MP2/cc-pVTZ CP	-6.509	-6.857	-6.975	-6.931	-7.068	-6.334	-7.069	-5.921	-6.84	-6.955	-6.611	-6.716	-6.875	-6.735	-6.384
19 MeOH ... Pyridine	MP2/cc-pVTZ CP	-6.928	-7.41	-7.51	-7.475	-7.669	-6.913	-7.675	-6.694	-7.377	-7.502	-7.079	-7.242	-7.422	-7.24	-6.782
20 AcOH ... AcOH	MP2/cc-pVTZ CP	-18.385	-19.093	-19.415	-19.301	-19	-16.643	-19	-17.362	-19.111	-18.982	-19.222	-18.194	-18.979	-19.396	-17.309
21 AcNH2 ... AcNH2	MP2/cc-pVTZ CP	-15.598	-16.265	-16.525	-16.434	-16.122	-14.406	-16.122	-14.626	-16.244	-16.167	-16.365	-15.694	-16.221	-16.075	-14.706
22 AcOH ... Uracil	MP2/cc-pVTZ CP	-18.727	-19.491	-19.783	-19.681	-19.401	-17.281	-19.401	-17.8	-19.484	-19.307	-19.567	-18.619	-19.389	-19.772	-17.625
23 AcNH2 ... Uracil	MP2/cc-pVTZ CP	-18.441	-19.189	-19.467	-19.37	-19.101	-17.233	-19.101	-17.545	-19.18	-19.007	-19.258	-18.404	-19.111	-19.364	-17.392
24 Benzene ... Benzene (pi-pi)	MP2/cc-pVTZ CP	-1.762	-2.822	-2.724	-2.758	-3.252	-4.164	-4.703	-3.678	-3.214	-2.781	-1.725	-2.794	-2.789	-3.129	-2.905
25 Pyridine ... Pyridine (pi-pi)	MP2/cc-pVTZ CP	-2.77	-3.895	-3.801	-3.831	-4.557	-5.366	-6.006	-4.875	-4.355	-3.911	-2.705	-3.841	-3.861	-4.329	-4.05
26 Uracil ... Uracil (pi-pi)	MP2/cc-pVTZ CP	-8.121	-9.829	-9.752	-9.771	-9.824	-9.794	-11.139	-9.065	-9.47	-9.371	-7.801	-9.395	-9.712	-9.558	-8.251
27 Benzene ... Pyridine (pi-pi)	MP2/cc-pVTZ CP	-2.337	-3.439	-3.342	-3.375	-3.973	-4.84	-5.432	-4.343	-3.851	-3.396	-2.27	-3.394	-3.405	-3.802	-3.54
28 Benzene ... Uracil (pi-pi)	MP2/cc-pVTZ CP	-4.281	-5.713	-5.593	-5.628	-5.82	-6.603	-7.535	-5.901	-5.776	-5.449	-4.017	-5.59	-5.673	-5.689	-5.113
29 Pyridine ... Uracil (pi-pi)	MP2/cc-pVTZ CP	-5.405	-6.819	-6.701	-6.734	-7.159	-7.658	-8.626	-6.881	-6.858	-6.555	-5.091	-6.644	-6.769	-6.888	-6.205
30 Benzene ... Ethene	MP2/cc-pVTZ CP	-0.828	-1.432	-1.364	-1.388	-1.428	-1.92	-2.325	-1.547	-1.705	-1.438	-1.084	-1.492	-1.48	-1.35	-1.279
31 Uracil ... Ethene	MP2/cc-pVTZ CP	-2.681	-3.38	-3.329	-3.341	-3.187	-3.398	-4.011	-3.047	-3.424	-3.273	-2.838	-3.337	-3.429	-3.151	-2.769
32 Uracil ... Ethyne	MP2/cc-pVTZ CP	-3.122	-3.738	-3.693	-3.707	-3.833	-3.735	-4.409	-3.398	-3.793	-3.624	-3.177	-3.644	-3.758	-3.704	-3.255
33 Pyridine ... Ethene	MP2/cc-pVTZ CP	-1.234	-1.872	-1.805	-1.827	-1.909	-2.395	-2.826	-2.03	-2.156	-1.9	-1.486	-1.918	-1.92	-1.819	-1.71
34 Pentane ... Pentane	MP2/cc-pVTZ CP	-2.867	-3.776	-3.764	-3.749	-2.658	-3.337	-3.968	-3.221	-3.555	-3.88	-3.141	-3.938	-4.023	-2.738	-2.347
35 Neopentane ... Pentane	MP2/cc-pVTZ CP	-1.97	-2.613	-2.604	-2.591	-1.778	-2.225	-2.675	-2.161	-2.431	-2.661	-2.186	-2.704	-2.77	-1.842	-1.57
36 Neopentane ... Neopentane	MP2/cc-pVTZ CP	-1.311	-1.777	-1.764	-1.756	-1.123	-1.46	-1.737	-1.399	-1.611	-1.796	-1.484	-1.833	-1.873	-1.153	-0.994
37 Cyclopentane ... Neopentane	MP2/cc-pVTZ CP	-1.783	-2.404	-2.397	-2.386	-1.614	-2.058	-2.485	-2.01	-2.23	-2.463	-1.976	-2.483	-2.547	-1.683	-1.424
38 Cyclopentane ... Cyclopentane	MP2/cc-pVTZ CP	-2.259	-2.997	-2.986	-2.977	-2.112	-2.641	-3.137	-2.569	-2.8	-3.09	-2.463	-3.085	-3.163	-2.189	-1.862
39 Benzene ... Cyclopentane	MP2/cc-pVTZ CP	-2.669	-3.575	-3.514	-3.533	-3.344	-4	-4.58	-3.83	-3.709	-3.682	-2.838	-3.622	-3.684	-3.31	-2.956
40 Benzene ... Neopentane	MP2/cc-pVTZ CP	-2.184	-2.895	-2.849	-2.863	-2.657	-3.124	-3.599	-3.009	-2.992	-2.997	-2.386	-2.921	-2.976	-2.623	-2.347
41 Uracil ... Pentane	MP2/cc-pVTZ CP	-3.655	-4.848	-4.811	-4.811	-3.909	-4.585	-5.441	-4.284	-4.556	-4.752	-3.672	-4.845	-4.957	-3.995	-3.433
42 Uracil ... Cyclopentane	MP2/cc-pVTZ CP	-3.076	-4.138	-4.091	-4.098	-3.339	-3.995	-4.698	-3.702	-3.889	-4.045	-3.08	-4.138	-4.223	-3.399	-2.94
43 Uracil ... Neopentane	MP2/cc-pVTZ CP	-2.869	-3.712	-3.689	-3.689	-3.035	-3.478	-4.05	-3.196	-3.487	-3.638	-2.924	-3.699	-3.784	-3.068	-2.654
44 Ethene ... Pentane	MP2/cc-pVTZ CP	-1.524	-2.005	-1.993	-1.988	-1.448	-1.73	-2.151	-1.631	-1.962	-2.076	-1.773	-2.078	-2.131	-1.48	-1.28
45 Ethyne ... Pentane	MP2/cc-pVTZ CP	-1.341	-1.748	-1.715	-1.727	-1.51	-1.723	-2.104	-1.577	-1.815	-1.873	-1.526	-1.804	-1.837	-1.48	-1.34
46 Peptide ... Pentane	MP2/cc-pVTZ CP	-3.32	-4.264	-4.256	-4.243	-3.254	-3.715	-4.513	-3.534	-3.988	-4.274	-3.462	-4.329	-4.436	-3.329	-2.855
47 Benzene ... Benzene (TS)	MP2/cc-pVTZ CP	-2.239	-2.876	-2.828	-2.843	-2.951	-3.258	-3.745	-3.115	-3.049	-2.964	-2.353	-2.833	-2.906	-2.896	-2.577
48 Pyridine ... Pyridine (TS)	MP2/cc-pVTZ CP	-2.886	-3.535	-3.506	-3.513	-3.688	-3.829	-4.39	-3.662	-3.678	-3.645	-2.966	-3.461	-3.563	-3.558	-3.179
49 Benzene ... Pyridine (TS)	MP2/cc-pVTZ CP	-2.704	-3.331	-3.293	-3.304	-3.472	-3.641	-4.175	-3.53	-3.485	-3.41	-2.795	-3.272	-3.366	-3.362	-2.999
50 Benzene ... Ethyne (CH-pi)	MP2/cc-pVTZ CP	-2.493	-2.867	-2.857	-2.86	-3.168	-2.914	-3.463	-2.99	-3.031	-2.958	-2.599	-2.781	-2.904	-3.022	-2.648
51 Ethyne ... Ethyne (TS)	MP2/cc-pVTZ CP	-1.371	-1.524	-1.539	-1.536	-1.623	-1.345	-1.661	-1.384	-1.589	-1.591	-1.517	-1.449	-1.531	-1.539	-1.34
52 Benzene ... AcOH (OH-pi)	MP2/cc-pVTZ CP	-4.122	-4.707	-4.726	-4.715	-4.924	-4.338	-5.25	-4.373	-4.76	-4.722	-4.269	-4.573	-4.713	-4.58	-4.146
53 Benzene ... AcNH2 (NH-pi)	MP2/cc-pVTZ CP	-3.843	-4.361	-4.405	-4.387	-4.49	-4.066	-4.722	-3.904	-4.396	-4.39	-4.07	-4.222	-4.373	-4.195	-3.752
54 Benzene ... Water (OH-pi)	MP2/cc-pVTZ CP	-2.947	-3.277	-3.288	-3.277	-3.423	-2.952	-3.567	-2.912	-3.312	-3.257	-3.057	-3.208	-3.304	-3.164	-2.88
55 Benzene ... MeOH (OH-pi)	MP2/cc-pVTZ CP	-3.604	-4.188	-4.168	-4.168	-4.253	-3.995	-4.762	-3.972	-4.28	-4.25	-3.797	-4.148	-4.251	-3.986	-3.634
56 Benzene ... MeNH2 (NH-pi)	MP2/cc-pVTZ CP	-2.651	-3.231	-3.199	-3.204	-3.148	-3.229	-3.843	-3.111	-3.338	-3.277	-2.832	-3.241	-3.31	-3.029	-2.74
57 Benzene ... Peptide (NH-pi)	MP2/cc-pVTZ CP	-4.46	-5.282	-5.255	-5.258	-5.441	-5.397	-6.199	-5.34	-5.425	-5.433	-4.651	-5.234	-5.349	-5.113	-4.674
58 Pyridine ... Pyridine (CH-N)	MP2/cc-pVTZ CP	-3.688	-4.146	-4.237	-4.205	-4.244	-3.817	-4.367	-3.772	-4.047	-4.178	-3.727	-4.014	-4.152	-3.915	-3.576
59 Ethyne ... Water (CH-O)	MP2/cc-pVTZ CP	-2.731	-2.85	-2.927	-2.899	-2.873	-2.529	-2.873	-2.761	-2.876	-2.863	-2.878	-2.705	-2.851	-2.939	-2.553
60 Ethyne ... AcOH (OH-pi)	MP2/cc-pVTZ CP	-4.515	-4.868	-4.966	-4.933	-5.019	-3.999	-5.029	-4.206	-4.945	-4.914	-4.862	-4.61	-4.849	-4.858	-4.264
61 Pentane ... AcOH	MP2/cc-pVTZ CP	-2.242	-2.912	-2.906	-2.894	-2.125	-2.435	-3.029	-2.252	-2.691	-2.878	-2.354	-2.948	-3.026	-2.203	-1.865
62 Pentane ... AcNH2	MP2/cc-pVTZ CP	-2.75	-3.534	-3.528	-3.516	-2.652	-2.966	-3.657	-2.772	-3.277	-3.483	-2.897	-3.541	-3.644	-2.735	-2.319
63 Benzene ... AcOH	MP2/cc-pVTZ CP	-3.097	-3.801	-3.747	-3.76	-3.713	-3.865	-4.556	-3.597	-3.861	-3.747	-3.167	-3.772	-3.873	-3.64	-3.211
64 Peptide ... Ethene	MP2/cc-pVTZ CP	-2.507	-2.999	-3.001	-2.995	-2.654	-2.611	-3.168	-2.45	-2.943	-3	-2.719	-2.947	-3.064	-2.634	-2.257
65 Pyridine ... Ethyne	MP2/cc-pVTZ CP	-3.72	-3.991	-4.104	-4.068	-4.206	-3.784	-4.207	-3.789	-4.045	-4.082	-3.882	-3.792	-3.972	-4.092	-3.675
66 MeNH2 ... Pyridine	MP2/cc-pVTZ CP	-3.363	-3.968	-3.966	-3.963	-3.972	-3.936	-4.552	-3.667	-4.018	-4.026	-3.484	-3.955	-4.043	-3.733	-3.42

## Sheet: New Table 5
Table 5: RMS differences (kcal/mol) between various high-level corrections with the cc-pVDZ-F12 and cc-pVTZ-F12 basis sets for a 58-system subset of the 1.0r_e slice of S66x8
	HLC(T*)	HLC(T)	HLC(Tb sc)	HLC(Ts)	HLC(T*sc)	S66x8 original(a)
relative to HLC(Tb sc)/cc-pVTZ-F12
F12b/cc-pVTZ-F12	0.0206086	0.0521587	REF	0.00949895	0.0129616	0.0914363
(F12*)/VDZ-F12	0.0445868	0.116345	0.0305902	0.0254411	0.0424305
F12b/cc-pVDZ-F12	0.0417889	0.136323	0.0272419	0.0362548	0.0301666
relative to HLC(Ts)/cc-pVTZ-F12
F12b/cc-pVTZ-F12	0.0210751	0.0430543	0.00949895	REF	0.0221507	0.0866799
(F12*)/VDZ-F12	0.045767	0.107581	0.036307	0.0246566	0.0503767
F12b/cc-pVDZ-F12	0.0385214	0.127282	0.0255631	0.0299127	0.0358279
relative to HLC(T* sc)/cc-pVTZ-F12
F12b/cc-pVTZ-F12	0.0269514	0.0650592	0.0129616	0.0221507	REF	0.0970966
(F12*)/VDZ-F12	0.0484262	0.129164	0.0281906	0.0323091	0.033756
F12b/cc-pVDZ-F12	0.0503176	0.149095	0.0342048	0.0463987	0.025865
CCSD-MP2 relative to cc-pVTZ-F12 (58 systems)
F12b/cc-pVTZ-F12	REF
(F12*)/VDZ-F12	0.0132129
F12b/cc-pVDZ-F12	0.0398033
(a) [CCSD(T)-MP2]/aug-cc-pVDZ with counterpoise correction
